# Supplementary material for: Population genomics of the Viking world
Source: bioRxiv or medRxiv preprint supplement (doi:10.1101/703405), 2019-07-17
Supplement: Supplementary file [file media-1.pdf]

# **SUPPLEMENTARY INFORMATION**

## **Supplementary Note 1. Ancient samples and archaeological background**

### **The Viking Age: A definition**

The Viking Age is understood as referring to the period c. 800-1050 CE in Scandinavia, the British Isles, the North Atlantic and the Baltic Sea Area. Like most other historical time periods (e.g. the “Middle Ages”, “Age of Crusades”, “Reformation Period”, or “Age of Enlightenment”), the term “Viking Age” does not refer to a naturally bounded time slice. It is commonly defined as a historical *durée* marked by the widespread and politically significant operation of sea-born warriors and colonists of Scandinavian descent in regions outside Scandinavia<sup>1</sup>.

Albeit the definition and naming of the period is debated<sup>2</sup>, most researchers agree that it is a phase of rapid and profound economic and cultural changes<sup>3,4</sup>. Many of these are related to the expansion and diversification of deep-sea seafaring, with a number of knock-on effects for societies. These include: closer interactions and confrontations between groups around the Baltic and North Seas and further afield<sup>5,6</sup>; an acceleration of cultural change and exchange, leading, for example, to the adoption of monetary systems of exchange and the spread of Christian religion in Scandinavian kingdoms<sup>7-9</sup>; an expansion of commercial exchange, focused on emerging maritime trading towns<sup>10-12</sup>; and colonization of the North Atlantic islands including the Faroese, Iceland, Greenland, with brief ventures into Newfoundland<sup>13,14</sup>. The demographic conditions and consequences of these events are widely discussed<sup>4,15,16</sup>, but many basic facts concerning both the size and development of populations and their interactions are poorly known from existing sources.

### **Populations and connectivity in first millennium CE Scandinavia**

The Viking Age does not by any measure mark a break of previous isolation, and any genetic developments in the period must be considered on the basis of a long and changing history of interactions in Northern Europe. Scandinavian societies were exposed to an increased cultural and probably also genetic exchange already in the late Roman period (c. 200-375 CE) with evidence of intense interactions between Scandinavian societies and the Roman Empire, especially its active Rhine boundary<sup>17</sup>. In the Migration period (c. 375-550 CE) written sources and archaeological evidence point to large scale migrations from Northern Europe including parts of Scandinavia into

32 Western Europe and the Mediterranean area<sup>18</sup>. This includes the settlement of Anglo-Saxons from  
33 present-day Northern Germany and Denmark in England, who left a very considerable cultural and  
34 genetic impact<sup>19,20</sup>.

35 The period around c. 530-550 CE has recently attracted particular attention, as evidence accumulated  
36 for a severe climatic event, the “Late Antique Little Ice Age”, when several major volcanic eruptions  
37 caused extreme global weather events in the Northern hemisphere<sup>21</sup>. This led to widespread famine  
38 and pandemic, the “Justinian Plague”, which is recorded across wide areas of Europe, probably  
39 including Scandinavia<sup>22</sup>. The effects in Scandinavia are suggested to include a demographic drop  
40 through widespread death and migrations<sup>23</sup>. While little evidence currently exists to qualify the  
41 detailed pattern of developments, it is possible that regions were affected differently, whence changes  
42 in population genetics could have occurred as a consequence.

43 The period c. 550-700 CE shows reduced archaeological evidence of migrations from and supra-  
44 regional interaction between Scandinavia and other regions<sup>24</sup>, albeit punctuated by finds such as the  
45 c. 630 CE Sutton Hoo boat burial in East Anglia, which shows marked Scandinavian affinities in  
46 material culture and burial ritual<sup>7,25</sup>.

47 As a historical dynamic, the “Viking phenomenon” is considered to emerge gradually in the course  
48 of the 700s CE. This is suggested by various lines of evidence including: the chronology of objects,  
49 which were likely brought into Scandinavia through the earliest raid and maritime trade<sup>26–28</sup>; evidence  
50 for the evolution of boat-building technology<sup>29</sup>; or direct evidence of maritime warfare, such as the  
51 boat burial of warriors from a mid-eighth century raiding party found in Salme, Estonia<sup>30</sup>. In  
52 particular, the chronology is charted by the spread of maritime trading towns or *emporion* in the Baltic  
53 Sea area (e.g. Ribe in Western Denmark c. 700 CE; Åhus in South East Sweden and Truso in Eastern  
54 Poland c. 725 CE; Birka in Middle Sweden and Staraja Ladoga in North West Russia after c. 750 CE  
55 <sup>10,12</sup>).

56 A first wave of raids, trade and colonization culminated in the period c. 840-880 CE, when large  
57 Viking armies operated in France and the British Isles, while the earliest colonists settled in Iceland,  
58 and trading expeditions reached the Black Sea, the Atlantic coast of Spain and Portugal, and with  
59 occasional ventures into the Mediterranean<sup>31</sup>. This is followed by a period with less evidence of  
60 Viking activity in Western Europe. Eventually this gave way to what is sometimes referred to as the  
61 “second Viking Age” in c. 970-1020 CE, when raids resumed in the west, leading to the amalgamation  
62 of a North Sea empire under king Cnut, who came to rule England, Denmark, Norway and part of  
63 Sweden between c. 1016 and his death in 1035<sup>32</sup>. While there is evidence for large-scale movement

and migrations across sea in both these episodes, it is not clear how they will have contributed relatively to the demography and population genetics of the period.

The end of the Viking Age is conventionally set to the mid eleventh century CE, when Scandinavian seaborne armies cease to be a primary political force in Western Europe. However, in many regions this date is acknowledged to be an arbitrary convention, as the pattern of maritime activities and connectivities, which mark out the Viking Age, continue to evolve in Scandinavia, the Baltic Sea area, Atlantic Britain and the North Atlantic well into the following centuries<sup>1</sup>.

### **The Viking Age burial record and DNA retrieval**

Burial customs show marked regional and chronological variation in and around Scandinavia in the Viking Age. While most regions see a gradual increase in the use of inhumation burials towards the end of the period, the early Viking Age is represented mainly by cremation burials in many parts of Scandinavia. This implies that there is a limited record of relevant bone remains available for sampling in much of Sweden, for example<sup>33,34</sup>. This problem is accentuated for the centuries immediately before the Viking Age (600-800 CE), where cremation burial is even more prevalent, leaving few options to sample for human DNA in most regions of Scandinavia.

The adoption of Christian burial practices in Scandinavia and the Baltic Sea area from the 10<sup>th</sup> century onwards implied that virtually all members of society from infants to adults were buried in designated burial areas around churches, leading to a very comprehensive archaeological record. For all previous periods, the record of individuals given an archaeologically visible burial is highly selective and skewed towards social elites. This must be borne in mind when assessing evidence for mobility and diversity, as there is much to suggest that elites maintained wider networks and enjoyed higher degrees of mobility compared to the average population<sup>33</sup>.

For this study, we have shotgun sequenced 528 ancient samples most of which were excavated in the major areas of Viking expansion during the late 8<sup>th</sup> until late 11<sup>th</sup> centuries. After removing poorly preserved and contaminated samples the number of samples was reduced to 442. The approximate locations of the archaeological sites are presented in Figure 1 in the main text. The details of sampled individuals with their unique IDs used throughout this study is presented in Supplementary Table 1. The vast majority of skeletal remains used for ancient DNA extraction were teeth and petrous bones. The samples originate from over 80 archaeological sites, covering large parts of Northern Europe and Greenland which is now represented by multiple countries including: Greenland (Eastern and Western settlements, n=23 individuals), Iceland (n=17), Faroe Islands (n=17), Ireland (n=4), UK

96 (n=42), Norway (n=41), Denmark (n=89), Sweden (n=123), Poland (n=10), Estonia (n=34), Russia  
97 (n=33), Ukraine (n=4) and Italy (n=5). The approximate locations of the main archaeological sites  
98 are presented in Figure 1 in the main text.

99 Most samples have been archaeologically dated to the Viking age (8-12<sup>th</sup> centuries CE) or had direct  
100 relevance to the Viking period such as the ones from later Norse settlements in Greenland, medieval  
101 samples from Faroe Island or noble family members of Ukrainian rulers of 12-13<sup>th</sup> centuries CE as  
102 well as earlier pre-Viking (from Estonia) and Iron Age samples. Two samples that were initially  
103 sampled as Viking Age individuals were identified as Late Neolithic/Bronze Age after radiocarbon  
104 dating.

105 This appendix contains a brief description of most archaeological sites from which we have ancient  
106 samples used for this study.

107



## 108 **DENMARK**

### 109 **Catalogue of Danish skeletons: Introduction**

110 The catalogue present information on the skeletons from Danish collections included in the study.  
111 This comprises find circumstances, burial type, a brief report of objects found with the skeleton and  
112 their dating, plus reports on osteological, pathological and biochemical analyses that have been  
113 carried out prior to the current project. The catalogue is based on information in the national database  
114 “Fund og Fortidsminder”, together with digests from published sources. The catalogue is organized  
115 geographically after the National Sites and Monuments Numbers (“Stednummer”). First, the museum  
116 and the museum number of the find is given. After this, the site is indicated by place name, parish  
117 (“sogn”), shire (“herred”) and county (“amt”). On the next line, the National Sites and Monuments  
118 number is given together with the year of finding. The project-specific “VK”-number(s) for Viking  
119 Genomics is/are listed after the description of the sites/graves.

120

### 121 **Bakkendrup**

122 **National Museum of Denmark RAS 45/83, Bakkendrup, Bakkendrup Sogn, Løve Herred,**  
123 **Holbæk Amt.**

124 Nat. Sites and Monuments no.: 03.02.01-52 (sb. 52.)                      Year of finding: 1979

125 A cemetery with flat inhumation graves near Bakkendrup Bro. It was excavated in 1979 by the  
126 National Museum. Dated to the second half of the 9<sup>th</sup> century AD.

127

128 Samples used for DNA analysis:

129 VK294 Denmark\_Bakkendrup losfund-2, conc.5

130 VK315 Denmark\_Bakkendrup Grav 16

131 VK369 Denmark\_Bakkendrup losfund-2, conc.1

132

### 133 **Bårse**

134 **Museum Southeast Denmark SMV 28/86, Bårse, Tyvestensager, Bårse Sogn, Bårse Herred,**  
135 **Præstø Amt.**

136 Nat. Sites and Monuments no.: 05.02.03-67.                      Year of finding: 1986

137 Excavated by Museum Southeast Denmark in 1986. A small Viking Age burial ground with 11  
138 inhumations located on a small hill. Grave A was the deepest and was covered with three large stones.  
139 Grave goods: a strap-end mount, a buckle from a belt (same as the one found in Rantzausminde)

140 dated to the 10<sup>th</sup> century AD, whetstones and a pumice with abrasion marks. Cremation graves were  
141 found underneath the inhumations (not known if these were of animals).

142

143 Samples used for DNA analysis

144 VK281 Denmark\_Barse Grav A

145

146 **Besser**

147 **National Museum of Denmark N01 353/41, C24368-83, Besser S, Samsø Herred, Holbæk Amt.**

148 Nat. Sites and Monuments no.: 03.05.01-45

Year of finding: 1941

149 Excavated by the National Museum in 1941. Six graves were found under a compact layer of stone  
150 on a small hill. The graves were originally constructed to fit wooden coffins, but fragments from a  
151 wood coffin were only recovered in one grave (Grave 1). Grave 1 was also the richest of the six  
152 burials. It contained a trefoil silver brooch, two oval brooches, a spindle whorl, four glass beads, a  
153 key, an iron knife and a hemispherical vessel. Grave 4 contained a shield boss, a whet stone, a knife,  
154 a ring needle of bronze and some undefined iron. The other graves only contained an iron knife.  
155 Grave 3 was the only inhumation grave. Grave 1, 5 and 6 were cremation graves but in man-length  
156 coffins. There were no human remains recovered in Grave 2 and 4. Has been dated to be from 750-  
157 1066 AD.

158

159 Samples used for DNA analysis

160 VK298 Denmark\_Besser Grav III

161

162

163 **Bødker garden**

164 **Langelands Museum LMR 13372, Bødkgårds mark/Bødker gård, Tryggelev Sogn, Langelands**

165 **Søndre Herred, Svendborg Amt.**

166 Nat. Sites and Monuments no.: 09.03.07-40.

Year of finding: 1997

167 Excavated by Langelands Museum in 1997. A small Viking-Age burial ground on a small hill  
168 containing five preserved inhumations. Soil is gravel and clay. Three graves are oriented E-W and  
169 each had an iron knife as grave goods. Two adjacent graves in a N-S direction. One contained a small  
170 clay-pot. Remains of settlement from early Iron Age with postholes and pits. Burial D (Male, adult),  
171 SW-NE oriented. Skull separated from body and found adjacent to lower part of torso. Mandible

172 found upside down in "original head end". Buried in supine position. Robust. Not young. Knife was  
173 found underneath the skull. Grave H (Male, adult) Right side hocker position in N-S direction with  
174 head N. Arms and legs bended. A small clay pot (14 cm diameter) next to torso. Charcoal and burned  
175 bone (animal) found in fill. Entire cemetery dates broadly to 9<sup>th</sup> century AD based on the finding of  
176 buckles/pins (type P 42 after Ingmar Jansson 1985)<sup>35</sup>. Grave D: Younger than grave C. Difficult to  
177 date more precisely. Grave H did not have any stratigraphy that could be related to the other graves.  
178 It was buried with a clay jar. It has also been dated to 9<sup>th</sup> century AD.

179

180 Samples used for DNA analysis

181 VK289 Denmark\_Bodkergarden Grav H, sk 1

182 VK291 Denmark\_Bodkergarden Grav D, sk 1

183

184 **Bogøvej**

185 **Langelands Museum LMR 12077, Bogøvej 21, Lindelse Sogn, Langelands Sønder Herred,**

186 **Svenborg Amt.**

187 Nat. sites and monuments no.: 09.03.04-28. Year of finding: 1987, 1988, 1989

188 Excavated in 1987, 1988 and 1989 by Langelands Museum. Burial ground from Viking period. The  
189 cemetery is located on small drumlins of very mixed moraine material with a high chalk content; there  
190 were thus varying, but often good, conditions for the preservation of skeletons<sup>36</sup>. The burial ground is  
191 located on a small hill 500 m south of Lidelse Nor in an elongated area (70m x 30 m in a NE-SW  
192 orientation). The burial ground was discovered in 1920, when four inhumation graves were  
193 uncovered. A total of 49 graves have been excavated of which three were double graves. Excavations  
194 in 1987 and 1988 also revealed activity dated to the late Bronze Age including 17 pits of which some  
195 contained flint tools, large amount of pottery, small fragments of bronze and some tools made of  
196 antler. The majority of the individuals had been buried in a supine position and a few in hocker. Some  
197 of the inhumation graves contained grave goods: knife- , whetstones, buckles, glass beads. Two stone  
198 lined tomb graves (Grave BA) had carriages (minus wheels) as coffins ("Vognfadning"), and a female  
199 burial with the remains of a wooden shrine containing an intact comb. A male burial contained an  
200 axe dated to the late Viking Age period, a strike-a-light and an Arabic silver coin. One skeleton was  
201 decapitated (Grave T). Most graves were oriented E-W. Of the sexed individuals: 15 were males and  
202 22 females. Only few subadults. Dated to 10th century, possibly with few graves dated to the early  
203 11<sup>th</sup> century AD (unknown which ones).

204

205 Samples used for DNA analysis

206 VK286 Denmark\_Bogovej Grav BJ

207 VK288 Denmark\_Bogovej Grav BA

208 VK292 Denmark\_Bogovej Grav A.D.

209 VK320 Denmark\_Bogovej Grav S

210 VK338 Denmark\_Bogovej Grav BV

211 VK361 Denmark\_Bogovej BX

212 VK362 Denmark\_Bogovej LMR 12077

213 VK363 Denmark\_Bogovej BT

214 VK364 Denmark\_Bogovej BN

215 VK365 Denmark\_Bogovej BS

216 VK366 Denmark\_Bogovej BY

217 VK367 Denmark\_Bogovej D

218 VK368 Denmark\_Bogovej T

219

## 220 **Galgedil**

221 **Odense City Museums OBM 4520, Galgedil, Otterup Sogn, Lunde Herred, Odense Amt.**

222 Nat. Sites and Monuments no.: 080306 -08. Year of finding: 1999–2005

223 Excavated by Odense City Museums in 1999–2005. Galgedil is a Viking-Age cemetery (c. 800-  
224 1050AD) located in the northern part of the Danish island of Funen. The site revealed 54 graves  
225 containing 59 inhumations and 2 cremation burials. Previous study of the remains to date has included  
226 light isotopes of carbon and nitrogen in collagen (10 samples) and the radiocarbon determination of  
227 the age of eight samples. In addition, aDNA was investigated in 10 samples from the cemetery by  
228 Melchior et al.<sup>37</sup> and Strontium analysis was carried out by Price et al.<sup>38</sup> The cemetery is situated on  
229 the top and down the southern and western slope of a small hill in a rolling, moraine landscape 5 km  
230 from the former seacoast. The investigated skeletal material from Galgedil consisted of the human  
231 remains from 57 inhumations with varying degrees of preservation. The number of male and female  
232 skeletons was almost the same. There were 24 males (48%) and 19 females (38%). Sex could not be  
233 determined in six of the adult skeletons (14%) or for the eight subadult individuals of various ages.  
234 Several individuals seem to be non-locals based on strontium isotopes: OU, UD.

235

236 Samples used for DNA analysis  
237 VK133 Denmark\_Galgedil KO  
238 VK134 Denmark\_Galgedil ALZ  
239 VK135 Denmark\_Galgedil ALY  
240 VK138 Denmark\_Galgedil AQQ  
241 VK139 Denmark\_Galgedil ANG  
242 VK140 Denmark\_Galgedil PT  
243 VK141 Denmark\_Galgedil OMB/BFQ  
244 VK278 Denmark\_Galgedil TQ  
245 VK279 Denmark\_Galgedil AXE  
246 VK280 Denmark\_Galgedil UO  
247 VK370 Denmark\_Galgedil ANO  
248 VK371 Denmark\_Galgedil UD-Vest  
249 VK372 Denmark\_Galgedil KM  
250 VK373 Denmark\_Galgedil BER  
251 VK411 Denmark\_Galgedil TT  
252 VK446 Denmark\_Galgedil LS

253

254 **Gl. Lejre**

255 **Roskilde Museum ROM 641/85, Mysselhøjgård, Allerslev Sogn, Volborg Herred, København**  
256 **Amt**

257 Nat. Sites and Monuments no.: 02.06.01-115. Year of finding: 2009

258 Excavated by Roskilde Museum in 2009. The archaeological site of Gl. Lejre. is located on Sealand  
259 ca. 35 km west of Copenhagen. Seven inhumation graves or deposit finds were excavated at the hall  
260 area of the aristocratic residence of Gl. Lejre<sup>39</sup>. One of the graves, A1636 was placed on the top of a  
261 hill in the centre of the residence while a group of four burials, A1859, A1860, A1861 and A1896  
262 were found 14 meters south of the it on a small slope. Grave A1880 was found in a disturbed area  
263 north of grave A1636 and 13 meters to the west in the North-Western corner of the residence another  
264 disturbed grave, A1697, was found.

265 All but one skeleton was lying in supine position with head in the west and in a long oval shaped  
266 graves and with no evidence of coffin, except for grave A1636. Grave A1896 was lying in hocker  
267 position. A total of five individuals could be sexed: four males and one female. Everybody were

268 middle aged adults or older. The only grave good that was found consisted of a brass finger ring  
269 placed on the left fourth finger of the female A1861).

270

271 Samples used for DNA analysis

272 VK94 Denmark\_GI Lejre-A1861

273 VK445 Denmark\_GI Lejre-A1896

274

## 275 **Hesselbjerg**

276 **Moesgaard Museum FHM 1379, Hesselbjerg, Randlev Sogn, Hads Herred, Århus Amt**

277 Nat. Sites and Monuments no.: 15.02.11-12. Year of finding: 1963–70, 1997–2001

278 The cemetery has a distinct location on a narrow sand and gravel hill stretching 3-400 m in a north-  
279 south direction. The surrounding landscape is flat with fertile agricultural land (UTM 574947 /  
280 6200145). The cemetery is located approximately 1 km south-east of the parish village Over Randlev  
281 and 3.8 km from the coast of Kattegat. The graves were positioned on the hilltop and on the east side  
282 of the hill. The graves were excavated by Moesgaard museum in 1963–70 and 1997-2001<sup>40-42</sup>. A total  
283 of 104 graves were recovered of which 84 were inhumations and 20 were cremations. The  
284 preservation of the skeletons varied. More or less intact skeletons were recovered from 69 graves.  
285 Over 80% of those interred in the cemetery were women. There were only limited graves and these  
286 were mostly personal equipment such as knives, iron belt buckles, whetstones, pottery, and a few  
287 pieces of jewelry. Only few graves contained elaborate artefacts. A single pit contained numerous  
288 glass and amber beads and an elaborately decorated bronze gilt belt buckle. The dating based on  
289 grave goods is mid- 9<sup>th</sup> to 10<sup>th</sup> century AD. An associated building was excavated c. 200 m north-  
290 west of the cemetery. A well has been dated through dendrochronology to about 900 AD. A pollen  
291 analysis of the bottom shows that the nearby area consisted of fields for grassing animals.

292

293 Samples used for DNA analysis

294 VK84 Denmark\_Hesselbjerg Grav 3

295 VK86 Denmark\_Hesselbjerg Grav 13

296 VK87 Denmark\_Hesselbjerg Grav 41b, sk PC

297 VK300 Denmark\_Hesselbjerg Grav 22, sk IR

298 VK339 Denmark\_Hesselbjerg Grav 16, sk GO

299 VK340 Denmark\_Hesselbjerg Grav 5, sk V

300 VK383 Denmark\_Hesselbjerg Grav 11, sk DT

301 VK384 Denmark\_Hesselbjerg Grav 14, sk EU

302

303 **Hesselbjergmarken**

304 **Langelands Museum LMR 11163, Hesselbjergmarken, Magleby Sogn, Langelands Søndre**

305 **Herred, Svendborg Amt.**

306 Nat. Sites and Monuments no.: 09.03.06-35. Year of finding: 1860, 1981

307 Excavated by Langelands Museum in 1982<sup>36</sup>. First burials discovered in 1860 and in 1981. Viking-  
308 Age burial ground. Grave B was buried with iron knife, whetstone and a silver coin (Museum no.  
309 11163:6a) Samanide coin dated to 903-913 AD. Buried in supine position with head in east end with  
310 face turned north and feet in the west.

311

312 Samples used for DNA analysis

313 VK318 Denmark\_Hesselbjergmarken Grav B

314

315 **Hessum**

316 **Odense City Museums/Nationalmuseet? [ML1] NM 818/50, Hessum, Skeby Sogn, Lunde**

317 **Herred, Odense Amt.**

318 Year of finding: 1950

319 The cemetery was recovered during gravel digging and four of the graves were excavated and  
320 analysed by Odense City Museums and the National Museum of Denmark in 1950. Two of the graves  
321 were relatively well preserved. Only limited grave goods in the form of an iron knife with wooden  
322 handle. It is unknown which grave it belonged to.

323

324 Samples used for DNA analysis

325 VK295 Denmark\_Hessum sk 1

326 VK316 Denmark\_Hessum sk II

327

328 **Hundstrup Mose**

329 **National Museum of Denmark N01 673/47, C26290-91, C28241-51, Hundstrup Mose,**

330 **Hammer Sogn, Hammer Herred, Præstø Amt.**

331 Nat. Sites and Monuments no.: 05.04.01-12 (sb. 12) Year of finding: 1947

332 Sacrificed victims buried in the bog of Hundstrup. In total two adults, two children and two infants  
333 were recovered. The two children (7-11 and 11-13 years) were found lying together. They had been  
334 covered with branches and had been buried with an iron knife. The preservation was very good, but  
335 none of the skeletons was complete. There are no signs of disease or trauma on the remains. Strontium  
336 analyses have been done on all of the children and adults and show that Sk. 2 (VK297) was non-local.  
337 The graves date to Germanic period rather than Viking Age<sup>43</sup>.

338

339 Samples used for DNA analysis

340 VK296 Denmark\_Hundrup Mose sk 1

341 VK297 Denmark\_Hundrup Mose sk 2

342

343 **Kaagården**

344 **Langelands Museum LMR 11563, Kaagården, Lindelse Sogn, Langelands Sønder Herred,**  
345 **Svendborg Amt.**

346 Nat. Sites and Monuments no.: 09.03.04-60.

Year of finding: 1984–87

347 Excavated by Langelands Museum from 1984–87<sup>36</sup>. Viking-Age cemetery (date to entire Viking Age  
348 period until 1000 AD. Grave BF possibly to 10<sup>th</sup> century AD) on a small hill with 70 graves (from  
349 late Germanic period to late Viking Age) but most of graves date to late Viking Age. The richest  
350 graves placed on the top of the hill. Contained graves of adults and subadults. Subadults were buried  
351 with iron knives. The presence of sand and the shells of marine molluscs in some of these graves at  
352 Kaagården, strongly indicates that the human skeletons were cremated on the nearby beach.

353

354 Samples used for DNA analysis

355 VK274 Denmark\_Kaargarden 391

356 VK275 Denmark\_Kaargarden 217

357 VK276 Denmark\_Kaargarden BH

358 VK285 Denmark\_Kaargarden Grav BZ

359 VK287 Denmark\_Kaargarden Grav BS

360 VK317 Denmark\_Kaargarden Grav BF99

361

362 **Kumle høje**



363 **Langelands Museum LMR 12845, Kumle høje, Lindelse Sogn, Langelands Sønder Herred,**  
364 **Svendborg Amt.**

365 Nat. Sites and Monuments no.: 09.03.04-41. Year of finding: 1998

366 Excavated by Langelands Museum in 1998. Viking-Age cemetery (date to 10<sup>th</sup> century AD ) with  
367 min. 11 adult individuals buried (males and females). A rare double grave with two males on top of  
368 each other: one on its back and the other facing down. Some cultivation post-mortem damage.  
369 Another male grave with healed cranial trauma, a female grave with a 17cm long iron knife, one male  
370 grave with broken legs (perimortem), a female grave covered with large stone slabs. The richest grave  
371 was of a female in supine position with iron artefacts and amber, part of a bronze belt buckle. Several  
372 other male graves showed trauma.

373

374 Samples used for DNA analysis

375 VK290 Denmark\_Kumle Høje Grav O

376

377 **Ladby**

378 **National Museum of Denmark NM 182/34, Ladby, Kølstrup Sogn, Bjerger Herred, Odense**  
379 **Amt.**

380 Nat. Sites and Monuments no.: 080106-06 Year of finding: 134–35, 1938

381 The burial ground of Ladby was uncovered west of Nymarksgård near the ship-grave of Ladby, south  
382 of Kerteminde Fjord. It was found during the course of gravel digging. It was excavated by the  
383 National Museum in 1934-35 and 1938. Ten flat inhumation graves were recovered. Traces of  
384 wooden coffin was found in Grave 2 (VK319). The grave was oriented NW-SE. Grave 4 (VK301)  
385 was buried in a supine position with head resting on a stone. The grave is oriented WN-ES. An iron  
386 knife was found in the grave. It has been difficult to determine the earliest and latest date for the use  
387 of the burial ground, since most of the graves were badly damaged and did not contain any objects  
388 that could yield specific dating. Most of the finds were iron knives. A C-14 dating of grave 4 from  
389 1997 yields a date of 640-890 AD with +/- 1 standard deviation. Conclusively, the burial ground is  
390 thought to have been in use from about 700 to sometime into 10<sup>th</sup> century CE<sup>44-46</sup>.

391

392 Samples used for DNA analysis

393 VK301 Denmark\_Ladby Grav 4

394 VK319 Denmark\_Ladby Grav 2

395

396 **Lejre**

397 **Roskilde Museum/National Museum of Denmark NM 194/45; NM 152/46, NM C29995-30150,**  
398 **Lejre, Kornerup Sogn, Sømme Herred, Københavns Amt.**

399 Nat. Sites and Monuments no.: 02.06.01- 7. Year of finding: 1953–68

400 Viking-Age cemetery comprising 49 graves at the Gl. Lejre ship setting. Excavated by National  
401 museum in 1953-68. Four graves were cremation graves. The fill of several graves contained  
402 potsherds and cremated bones. No archaeological information is available.

403

404 Samples used for DNA analysis

405 VK90 Denmark\_Lejre Grav 902

406 VK92 Denmark\_Lejre Grav 935

407 VK247 Denmark\_Lejre Grav 804

408 VK385 Denmark\_Lejre Grav 321

409

410 **Rantzausminde**

411 **Langelands Museum NM 288/27, Rantzausminde, Egense Sogn, Sunds Herred, Svendborg**  
412 **Amt.**

413 Nat. Sites and Monuments no.: 09.05.04-66. Year of finding: 1926, 1927

414 Viking-Age cemetery. Seven inhumations. No further metadata at Antrolab. There is no C-14 dating,  
415 but few archaeological artefacts date the graves to late 8<sup>th</sup> to early 9<sup>th</sup> century AD.

416

417 Samples used for DNA analysis

418 VK312 Denmark\_Rantzausminde Grav 1

419 VK313 Denmark\_Rantzausminde Grav 2

420 VK314 Denmark\_Rantzausminde Grav 5

421

422 **Stengade**

423 **Langelands Museum LMR C195, Stengade I, Tullebølle Sogn, Langelands Nørre Herred,**  
424 **Svendborg Amt.**

425 Nat. Sites and Monuments no.: 09.02.09-58. Year of finding: 1905–23, 1963, 1972-74

Excavated by Langelands Museum in 1972-74. A Viking Age cemetery constructed on a small bank and discovered during marl digging. The site comprises four inhumation graves, of which Grave 3 had a rich equipment of weapons and riding gear as well as the skeleton of a horse. Human remains were only preserved in Grave 4, a mature adult male buried with an iron knife. The site also comprised two inhumation graves from the Early Roman Period, four cremation graves from Roman period and three undateable inhumation graves. Skeletal material has not been preserved from these graves. Grave LMR c195 (AS 36/78) may stem from this site<sup>44,47,48</sup>.

Samples used for DNA analysis

VK282 Denmark\_Stengade I, LMR c195

#### **Tollemosegård**

**Tollemosen, Tollemosegård. Græse Sogn, Lyng-Frederiksborg Herred, Frederiksborg Amt. MFG 113/97.**

Nat. Sites and Monuments no.: 01.03.03-61. Year of finding: 1997

A cemetery dated to late Germanic and early Viking Age period (700-1000 AD) based on grave goods. A total of 54 graves. Several containing double graves and a few cremations. Double graves in layers. Varying amounts of grave goods: from none, to rich goods including sacrificed animals, knives, glass beads, amber beads, nails, wooden buckets. Strontium analysis has been conducted on BQ (VK65), BT, and EW (VK 70) samples.

Samples used for DNA analysis

VK65 Denmark\_Tollemosegard-BQ

VK69 Denmark\_Tollemosegard-DS

VK70 Denmark\_Tollemosegard-EW

VK71 Denmark\_Tollemosegard-BU

#### **Trekroner**

**Roskilde Museum ROM 2285, Trekroner Øst-Grydehøj, Fløng Sogn, Sømme Herred, Roskilde Amt.**

Nat. Sites and Monuments no.: 02.04.01-17. Year of finding: 2000

457 Grydehøj is a small hill east of Roskilde. The hill has been used as a burial site for approximately  
458 3000 years. The west side of the hill was used during the early Viking Age period in which 27  
459 inhumations have been recovered. At the time of excavation, the highest point of Trekroner-Grydehøj  
460 was approximately 39 m above sea level and thereby the highest point within 1km radius. At the foot  
461 of the east side there is a small lake today, but may have been a peat bog at that time.

462 The burials dated to the Viking Age period represents burials from the very early Viking Age (8<sup>th</sup> to  
463 9<sup>th</sup> century). Only few graves contained grave goods that could aid in the dating of the graves and all  
464 pointed towards this early period. Anthropological examination has shown that there were 14 males,  
465 8 females and 10 unidentified individuals. Grave goods were found in 21 graves. Larger stones were  
466 found in the grave A2058 and a stone was found on the left shoulder of the body<sup>49</sup>.

467

468 Samples used for DNA analysis

469 VK284 Denmark\_Grydehoj A2058

470

471 **Ribe**

472 **Sydvestjyske Museer ASR 13, Ribe, Ribe Domkirke sogn, Ribe Herred, Ribe Amt.**

473 Nat. Sites and Monuments no.: 19.04.08-81.

Year of finding: 2008–11.

474 Morten Søvsø, Museum of Southwest Jutland, Denmark

475

476 Excavations of this site were carried out in 2008-11 at the cathedral in Ribe (Fig. S1.1), Jutland  
477 located a Christian cemetery sealed by settlement layers c. 1050 AD<sup>50</sup>. <sup>14</sup>C-dates combined with a  
478 large archaeological dataset including stratigraphy, preservation, grave customs and coffin types  
479 dates the burials between c. 850 and 1050 AD leaving little doubt, that the find documents the  
480 existence of Ansgar's church, founded c. 855 AD. Ribe is Scandinavia's first town from around AD  
481 700. Became a major trading place/emporium with controlled coin economy in the 8<sup>th</sup> C. Decline  
482 from late 9<sup>th</sup> C. A Church, the present-day Cathedral, was founded c. AD 860. Samples come from  
483 Christian burials at this site predating AD 1050.

484

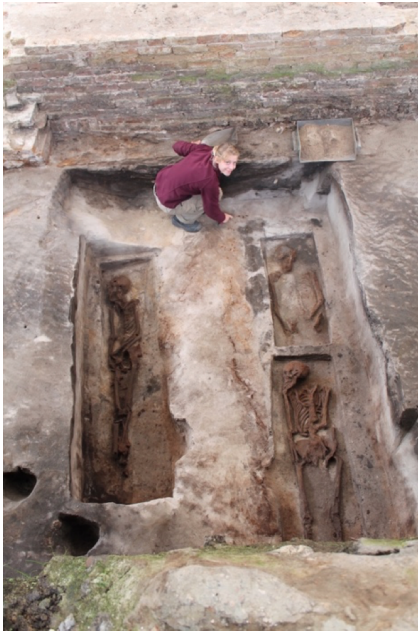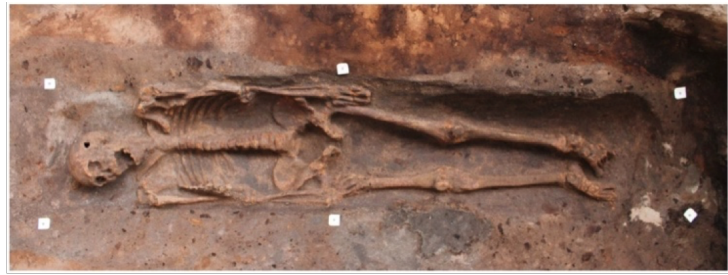

**Fig. S1.1:** The Ribe site during excavation (left) and the skeleton K1586 sampled for aDNA analysis in this study. Photo: Museum of Southwest Jutland.

#### Samples used for DNA analysis

VK322 K1568

VK323 K1563

VK324 K1552

VK325 K1572

VK326 K1578

VK327 K1586

VK328 K1594

VK329 K1600

VK330 K1582

#### Gerdrup

**Roskilde Museum ROM 191/8, Gerdrup, Kirkerup Sogn, Sømme Herred, Københavns Amt.**

Nat. Sites and Monuments no.: 02.04.08-67. Year of finding: 1981, 1983

Ole Kastholm, Roskilde Museum, Denmark

In the autumn 1981, the find of a Bronze Age sword was reported to Roskilde Museum. The sword came from a field a few km north of Roskilde, an area with many burial mounds, some still standing

507 as visible monuments in the landscape, others more or less destroyed by ages of ploughing and stone  
508 harvesting. Archaeologists of the museum visited the find place, and it was evident that the sword  
509 originated from a now destroyed burial mound. Furthermore, a number of dark spots were observed  
510 in the newly ploughed field, which were thought to be cremation graves. Based on this, a small trial  
511 excavation was carried out, which confirmed the existence of such graves as well as an inhumation  
512 grave. Two graves were examined in 1981 and the museum returned for a larger campaign in 1983.  
513 The excavations unearthed a number of burials dating from Late Neolithic to the Viking Age. In total  
514 c. 1800 m<sup>2</sup> was excavated.

515

516 The 1981-campaign:

517 Grave A: cremation grave, no artefacts, AMS-dated to c. 400 AD (sample A10) and c. 1800 BC  
518 (sample A12).

519 Grave B: double inhumation grave, male + female, contextually dated to the 9th century AD. The  
520 male person (age 35-40 years) was lying with the head and neck in an awkward position, and had  
521 probably his neck broken. Furthermore, his ankles were crossed, as if they had been tied together. He  
522 was buried with an iron knife. The female person (age 40-50 years) had given birth at least once and  
523 was buried with an iron knife, a bone case with iron needles and a spear. The spear head (Jan  
524 Petersen's Type E)<sup>51</sup> dates the grave.

525

526 Samples used for DNA analysis

527 VK213 Denmark\_Gerdrup-A10

528 VK214 Denmark\_Gerdrup-A12

529 VK215 Denmark\_Gerdrup-B; sk 1

530 VK216 Denmark\_Gerdrup-B; sk 2

531

532 **Kragehave Ødetofte**

533 **Kroppedal Museum TAK 1049, Høje Tåstrup Sogn, Smørum Herred, Københavns Amt.**

534 Nat. Sites and Monuments no: 020207-115

Year of finding: 2004

535

536 Excavated by Kroppedal museum in 2004. Settlements including 42 houses, 11 fence-structures and  
537 several wells were found dated to the later part of the Iron Age 3-8<sup>th</sup> century AD.

538 Three inhumation graves were recovered. One, a female dated to Early Roman Iron Age (0-200AD),  
539 and the other two, a female and a male (x1718) dated to the Late Roman Iron Age (C2/C3) (200-  
540 375AD).

541 The skeleton x1718 was of an old adult male (50+ years) with osteoarthritis in elbow joints, hips and  
542 vertebrae. Significant dental wear, AM loss and crowded teeth.

543 Samples used for DNA analysis

544 VK532 Kragehave Odetofter XL718

545 **Brøndsager**

546 **Kroppedal Museum SØL 941, Torslunde Sogn, Smørum Herred, Københavns Amt**

547 Nat. Sites and Monuments no: 020213-41.

Year of finding: 1997-1998

548

549 Excavated by Søllerød Museum in 1997-98. A cemetery containing minimum 20 graves. The graves  
550 were found on a small plateau. Settlements were found on the south side of the plateau. Only three  
551 skeletons were excavated. They dated to the Late Roman Iron Age (C2) (200-380AD). One grave  
552 (grave 900) contained a male (25-30 years) buried in supine position in a wooden coffin with the head  
553 to the south. The grave contained rich grave goods. A silver fibula was found next to his right  
554 shoulder, a comb of bone and bronze rivets was found next to his hip, and he was wearing a small  
555 gold ring on his toe. A wooden bucket with bronze inlays and handle was found by his feet. Two  
556 smaller bowls were found inside the bucket as well as a glass. The remains of a slaughtered sheep  
557 were found in an upper layer of the grave. He had osteoarthritis in his lower spine.

558 Another grave contained a sub adult, ca. 14-15 years, possibly male (based on grave goods) buried in  
559 a wooden coffin with a wooden bucket with a bronze belt, four clay bowls, two Roman drinking  
560 glasses, a play board with red paint, 30 white and 29 black playing pieces, a comb of bone with bronze  
561 rivets, a pearl necklace and a gold Aureus with an eyelet. He had a gold coin in his mouth and a gold  
562 ornamented ring dated to the Late Roman Iron Age. He was buried with a pig and butchered sheep.

563 The third grave contained a 4-5-year-old child also buried in a wooden coffin. It was buried with a  
564 pearl necklace made of bronze and amber, a comb of bone with bronze rivets, two clays bowls and a  
565 pig.

566

567 Samples used for DNA analysis

568 VK521 Sol941 Grav900 Brondsager Torsiinre

569

570 **Alken Enge**  
571 **Skanderborg Museum SBM 1028, Torslunde Sogn, Smørum Herred, Københavns Amt**  
572 Nat. Sites and Monuments no: 020213-41. Year of finding: 1997-1998  
573  
574 Excavated by Skanderborg Museum in 2013-2014. The wet meadows of Alken Enge (Alken  
575 Meadows) at Lake Mossø are the site of a mass grave with skeletal remains of a minimum estimate  
576 of 380 defeated warriors deposited in an original sea basin. The specific bone sample was deposited  
577 is in a natural channel between two sea basins. The tooth is from the lower jaw / mandibula on a  
578 disarticulated male individual found centrally in the northern main field of the Alken Enge  
579 excavation. No abrasion, pathologies or special bone damage have been observed. There were six  
580 remaining teeth - the rest has fallen out. In the absence of dating, it must be found attributed to the  
581 total dating frame 2 BC-54 AD. Context and fund data etc. is presented in the publication and its  
582 supplementary data<sup>52</sup>.  
583  
584 Samples used for DNA analysis  
585 VK582 SBM1028 ALKEN ENGE 2013, X2244  
586  
587  
588



589 **Catalogue of Norwegian skeletons**  
590 **(Without samples from Trondheim)**  
591 **Jan Bill, Museum of Cultural History, Oslo, Norway**  
592

593 **Introduction to the catalogue**

594 The catalogue presents information on the Viking Age and earlier skeletons from Norwegian  
595 collections included in the study. This comprises find circumstances, burial type, a brief report of  
596 objects found with the skeleton and their dating, plus reports on osteological, pathological and  
597 biochemical analyses that have been carried out prior to the current project. The catalogue is mainly  
598 based on information gathered from published sources, as well as the collection databases of the  
599 Norwegian university museums and the database for the Schreiner Collection, where the skeletons  
600 are kept. The Schreiner Collection distinguishes between skeletons with crania of ‘Nordic’, ‘Sami’,  
601 ‘Eskimoic’, ‘Other’ or ‘Unknown’ type in order to avoid conflict with regulations for the sampling  
602 and use of Sami human material for research. All the skeletons in the present catalogue have been  
603 categorized as having skulls of ‘Nordic’ type.

604 The catalogue is geographically organized, starting with skeletons found in SE Norway, and ending  
605 with those found in N Norway. First is given the museum number, the starting letters of which  
606 indicates to which museum collection the finds belong. The museum number serves as reference to  
607 information in the museum archives and registers. “C” is the Museum of Cultural History and  
608 University of Oslo; “T” is the University Museum at the Norwegian University of Science and  
609 Technology in Trondheim; and “Ts” is the University Museum at The Arctic University of Norway  
610 in Tromsø. Next, starting with A, is given the skeleton’s number in the Schreiner Collection; the  
611 Schreiner Collection is today part of the Institute of Basic Medical Sciences, formerly the Anatomical  
612 Institute, and holds the majority of archaeological skeletons from the Viking Age and earlier found  
613 in Norway. Next follows the project-specific “VK”-number for Viking Genomics. After that are given  
614 the name of the region (“fylke”), the municipality (“kommune”) and the farm (“gård”), followed by  
615 the farm number, the smallholding number and, if applicable, any local place name associated with  
616 the site.

617 In the next line follows the identification number in the National Register for Archaeological  
618 Monuments (“Askeladden”); however, not all finds are registered in this database.

619 Geographical coordinates are given in EU89-UTM zone 33; if imprecise, the accuracy is stated as  
620 within the “smallholding”, “farm”, or “municipality”. Following this, the year of finding is stated.

621

622 **Catalogue**

623 **Hedmark**

624 **C25552, A4005, VK448, Hedmark, Ringsaker, Berg øvre (619/9 «Breidablikk»)**

625 Askeladden ID: None

626 Coordinates: EU89-UTM zone 33 N6746886 E275540 (smallholding)      Year of finding: 1933

627 The skeleton was found in 1933 when a burial mound was being removed by the land user. It was  
628 found lying on two stone slabs, and had been covered by two or three further slabs; an accompanying  
629 sickle type R. 384 dates the burial to the Viking Age. The site was inspected by Alf Söderholm from  
630 the Institute of Anatomy at the University of Oslo, and he concluded that the skeleton, which had  
631 been removed from the burial before his arrival, was female.

632 The Schreiner database describes the skeleton as brownish and from an adult woman with a skull of  
633 Nordic type. It also describes the position of the skeleton as 'atypical', and cites a letter from  
634 archaeologist Sigurd Grieg, University of Oslo, saying that the head was said to be found lying  
635 between the legs, and the body with its upper part to the north.

636

637 **C26737, A4304, VK422, Hedmark, Åmot, Arnestad lille (25/1)**

638 Askeladden ID: 41956-1

639 Coordinates: EU89-UTM zone 33 N6785034 E303152      Year of finding: 1938

640 The burial, which was placed in a small mound, was found by a farmer in 1938 when he quarried the  
641 mound for stones. Apart from the skeleton, he found the following objects: One double-edged sword  
642 of Petersen's M-type, a double-edged sword blade, an axe of Petersen's G-type and an arrowhead  
643 type R. 539. The grave was subsequently investigated by an archaeologist, Sverre Marstrander, but  
644 apart from another arrowhead, somewhat similar to type R. 538, this did not produce further finds.  
645 The human bones in the burial are reported to originate from two individuals, a young, strongly built  
646 man in his early twenties, and another person being 50-60Y old. It is also stated that there are animal  
647 bones, including horse bones, included in the osteological material.

648 The M-type swords are dated by Androschchuk<sup>53</sup> to around the mid-10th century, and is a common  
649 companion to the G-type axes<sup>51</sup>.

650 The Schreiner database describes the human material as being yellowish and originating from a male  
651 and a person of unknown sex. The skull is described as Nordic.

652 Russ<sup>54</sup> has examined the material and separated it into two individuals, A, and B. It was individual  
653 A, which was sampled for DNA. The post-cranial bones were not possible to assign to either of the

two individuals. The remains of A consist of a very fragmented cranium, to which two fragments of a mandibula seemingly can be associated. The sex of this individual cannot be determined, but the age determination indicates that he/she was 17-30Y, and most likely in his/her early 20's at the time of death. Porosities on frontal, parietal and occipital bones may indicate anaemia. Naumann<sup>55</sup> has carried out isotopic analyses on both individuals. A sample from a mandible from individual A produced the following isotope results:  $\delta^{13}\text{C}$ : -20.6, %C: 41.4,  $\delta^{15}\text{N}$ : 10.9, %N: 14.0, C:N: 3.4<sup>55</sup>. A sample from a 2<sup>nd</sup> molar from the mandible produced those:  $\delta^{13}\text{C}$ : -20.7, %C: 36.2,  $\delta^{15}\text{N}$ : 11.5, %N: 12.6, C:N: 3.3,  $^{87}\text{Sr}/^{86}\text{Sr}$ : 0.7159.

**C17564, A2813, VK420, Hedmark, Vang, Tommelstad (6/-)**

Askeladden ID: None

Coordinates: EU89-UTM zone 33 N6747756 E287415 (bruk) Year of finding: *c* 1893

The skeleton originates from a burial mound, where it was found together with three iron knives of a type different from those of the Early Iron Age, an arrowhead of the type R. 539, a fire steel of the common type R. 426 and an iron handle for a pot. The finds only allow a dating to the Viking Age in general.

The information in the Schreiner database is sparse. The skeleton is described as brownish and adult, but no sex determination has been made. The cranium with mandible and a part of the right humerus is preserved, and is characterized as Nordic.

**C25720, A4006, VK393, Hedmark, Ringsaker, Mæhlum (752/1)**

Askeladden ID: 29529

Coordinates: EU89-UTM zone 33 N6751636 E282299 Year of finding: 1933

The skeleton was found during the professional excavation of a burial mound, 7.5 m in diameter, situated on a natural hummock *c* 250 m W of the farm. The skeleton was situated in the middle of the mound, placed E-W. Six arrowheads – three type R. 358, two type R. 359 and one of undetermined design – were placed near the head, while the other finds were made on the northern side of the torso and at the hips. These included an iron tool of unknown function, a possible fragment of an iron buckle, a fire steel type R. 426, and a fragment of a three-layered bone or antler comb with an iron rivet.

686 The R. 358 arrowheads date the burial to the 10<sup>th</sup> century, a dating not in conflict with the presence  
687 of type R. 359 arrowheads<sup>51</sup> and a type R. 426 fire-steel<sup>56</sup>.

688 The Schreiner database describes the skeleton as brownish in color and from an adult male. The skull  
689 is characterized as Nordic. Russ<sup>54</sup> also suggests that the individual is male, and based on the teeth she  
690 suggest that he was 33-45Y at the time of death, while the cranial sutures indicate a somewhat higher  
691 age. The teeth are worn, at least two shows caries, and there is ample calculus and hypoplasia. The  
692 man has been strongly built and was possibly above average height. The spine shows lipping age- or  
693 wear-related lipping. The cranium shows a large lambdoid ossicle and a parietal notch bone.

694 Krzewińska, et al. (2015) estimated the mtDNA HVR1 sequence of this individual to represent  
695 haplogroup HV4a<sup>57</sup>.

696

697 **C27338, A4460, VK394, Hedmark, Åmot, Arnestad store (24/1)**

698 Askeladden ID: 12709-1

699 Coordinates: EU89-UTM zone 33 N6784587 E303102

Year of finding: *c* 1943

700 During the demolition of a one meter high, 5 m wide burial mound of mainly stones, a skeleton and  
701 several finds were unprofessionally recovered. An archaeological inspection of the site after  
702 excavation did not produce further finds. The finds included a poorly preserved axe resembling type  
703 R. 555, equivalent with Petersen's type H, four arrowheads type R. 539 and two R. 540 ones, plus  
704 some unidentifiable iron objects.

705 The R. 540 arrowheads indicate a migration period dating, which is in contrast to the axe of Petersen's  
706 type H, datable to the first half of the 10<sup>th</sup> century, perhaps the entire century; an arrowhead type R.  
707 539 does not provide any clarity. The axe may be considered the more important dating element.

708 The Schreiner database declares the skeleton to be brownish and from an adult of Nordic type, but  
709 gives no sex determination.

710

711 **Oppland**

712 **A2808, VK417, Oppland, Gran, Sandeødegården on Nedre Hov (262/- or 263/-, Lindbak)**

713 Askeladden ID: None

714 Coordinates: EU89-UTM zone 33 N6699700 E255988 farm

Year of finding: 1868

715 Two inhumation burials in two mounds (no. 1 and 2), excavated in 1868 by Nicolay Nicolaysen. No  
716 objects are associated with the burials, and there were no indications of a construction of a grave  
717 chamber. Mound no. 1 was app. 6,5 m in diameter and about 2 m high – a 1.5 m high stone was found

718 on top of the mound, where it has apparently earlier been placed in an upright position. Charcoal was  
719 found sparsely in the mound filling, and the skeleton was found, in a somewhat disturbed state, in the  
720 middle of the mound, at some distance above the basis of the mound.

721 Mound 2 was placed next to and NW of mound 1, and was about 1.2 m high and 7.8 m in diameter.  
722 Centrally in the mound was found a skeleton, lying on its back in an E-W orientation, with the head  
723 towards east.

724 The graves can only be dated, by their burial type, to within the Late Iron Age.

725 The Schreiner database describes the two skeletons as brownish and the skull(s) as of Nordic type. It  
726 also mentions that there was at least one animal bone in the material turned over to the Schreiner  
727 Collection in 1885, but that was discarded along with other bones in 1924. It is unknown, from which  
728 mound the skeleton originates.

729

730 **C35586, A5305, VK386, Oppland, Lesja, Skålgård søndre (131/1)**

731 Askeladden ID: 11363

732 Coordinates: EU89-UTM zone 33 N6898881 E189426

Year of finding: 1981

733 The grave was found next to a large stone during digging for the construction of a farm road in 1981.  
734 An archaeological control dig produced no further information. Apart from the skeleton, the grave  
735 contained a sword of Petersen's type L, with remains of a sheath, a whetstone of sandstone, a fragment  
736 of an iron knife blade and an iron fragment of unknown use. Androschchuk<sup>53</sup> dates Petersen's L-type  
737 from the 870's into the 11<sup>th</sup> century.

738 The Schreiner database describes the skeleton as being of varying colour and originating from a  
739 mature male, around 50Y old at the time of death.

740

741 **C24243 and 24297, A3777-3778, VK421 and VK387, Oppland, Jevnaker, Velo nordre (164/6)**

742 Askeladden ID: None

743 Coordinates: EU89-UTM zone 33 N6694793 E247284

Year of finding: 1928

744 Due to a mistake, the two skeletons VK421 and VK387 are recorded on two different farm numbers  
745 in the collection, but originate from the same grave on farm 164/6. VK421, *alias* C24243, was found  
746 June 1928 during construction of a roadbed from the farmhouse to the public road and sent by the  
747 local sheriff to the museum. VK387, *alias* C24297, originates from the resulting archaeological  
748 investigation of the find site, carried out by the Anatomical Institute, not the museum of University  
749 of Oslo. Because of their different ways into the museum and the findings of ceramics at the

archaeological investigation, they were considered two different graves.

The find site is situated in the yard of the farm Velo Nordre, c. 20 SW of the farmhouse. The initial finds were made 25-30 cm below the surface, and consisted of a skeleton oriented E-W, with the head to the W, and a small axe. This is of Petersen's L-type, datable to the mid-10<sup>th</sup> to 11<sup>th</sup> century<sup>51</sup>. By the archaeological excavation of the remaining part of the grave some weeks later, remains of a further, female skeleton was found, along with unrecovered remains of two infants. The female skeleton was orientated the same way as the one first found, and the infants were lying at its feet. The excavation also produced a ceramic shard identified to be from a vessel of type R. 361, two undefinable pieces of burned clay and a small, unidentifiable piece of iron. The entire grave, with all four skeletons, had been lined with rather thick timbers, but no iron nails were found. The shard indicates an Early Iron Age date, but may represent an earlier settlement on the site. The Velo farm has produced finds going back to the Bronze Age.

The Schreiner database states about the VK387 skeleton (A3778) that it is brownish, adult, and female. The cranium is classified as Nordic. The VK421 skeleton (A3777) is described as likewise brownish and adult, but male. Russ<sup>54</sup> confirms A3777 to be male, based on the cranial features. The teeth shows strong wear and post-mortal loss of enamel. The age is estimated to +45Y. The post-cranial bones could not be found in the collection. Krzewińska, et al.<sup>57</sup> suggest haplogroup U5a/U5b2 for the individual's mtDNA HVR1 sequence.

**C14690-14692, A1517, VK414, Oppland, Skjåk, Nedre Hjeltar (59/1)**

Askeladden ID: 51891

Coordinates: EU89-UTM zone 33 N6878623 E153537

Year of finding: 1889

The skeleton was found in an E-W oriented burial, with the head towards W, and the grave goods placed at either side of the cranium. The finds consisted of an axe, identified as a R. 555, four arrow heads and some unidentifiable iron objects. The R. 555 type is the same as Petersen's H-type, datable to the second half of the 10<sup>th</sup> and the first part of the 11<sup>th</sup> century. The arrowheads cannot be identified. The Schreiner database describes the skeleton as brownish and from an adult male; the cranium is described as Nordic. According to the description by Schreiner<sup>58</sup>, substantial parts of the skeleton are preserved. Russ<sup>54</sup> estimates that the individual is male, and +45Y of age, due to closure of cranial sutures. The few remaining teeth show heavy wear, and there are calculus and signs of extreme parodontosis and resorption. The post-cranial skeleton shows extensive wear and examples of eburnation in several joints. Both femurs have an atypical shape, being flat and broad. Krzewińska,

782 et al.<sup>57</sup> find the mtDNA HVR1 sequence of this individual to represent haplogroup H6<sup>57</sup> .

783

784 **C21852, A1520, VK415, Oppland, Lunner, Hov**

785 Coordinates: EU89-UTM zone 33 N6691573 E258795

Year of finding: 1910

786 The location of this find is slightly unclear, but is here located according to the placename “Hov”.

787 This skeleton was found approximately in the centre of a round mound, extended on its back and with  
788 the head towards W. The right arm was bent over the breast. The only grave goods found was a  
789 mosaic bead of black glass with milk-white and red decorations, datable to the Viking Age.

790 The Schreiner database describes the skeleton as brownish, adult and from a female; the skull is  
791 described as Nordic. A list of the preserved skeletal parts are provided by Schreiner<sup>58</sup>.

792

793 **Telemark**

794 **C21794, A1645, VK392, Telemark, Vinje, Særen (23/-)**

795 Askeladden ID: None

796 Coordinates: EU89-UTM zone 33 N6626654 E100574 (farm)

Year of finding: 1915

797 The information about the circumstances of this find is vague. It was found by an Olav Nykos during  
798 hunting in a scree 2 km N of the Særen farms. Two keys of type R. 459 dates the grave to the Viking  
799 Age before the 11<sup>th</sup> century<sup>56</sup>. No other finds were made.

800 In the Schreiner database the skeleton is described as greyish, adult and of undetermined sex, but with  
801 a Nordic cranium type. Russ<sup>54</sup> estimates the skeleton to be female and, based on the fusion of the  
802 cranial sutures and the heavily worn teeth to be +45Y. One caput mandibulae and one femur shows  
803 anomalies; some of the long bones are bent, but it is unclear if this is post-mortem or pathological.  
804 Krzewińska, et al.<sup>57</sup> find the individual's mtDNA HVR1 sequence to represent haplogroup H\*.

805

806 **C22242a-d, A1648A and A1648B, VK390 and VK391, Telemark, Skien, Søndre Mæla (4/76**  
807 **Berg)**

808 Askeladden ID: None

809 Coordinates: EU89-UTM zone 33 N6576689 E191488 (GÅRD)

Year of finding: 1918

810 The two skeletons in this grave were found in 1918 during fence construction on the parcels Kveldro  
811 and Vesterbø on the smallholding Berg under Mæla søndre. The skeletons were lying close together,  
812 and apart from the human remains, only two not cruciform brooches were found. They resemble the  
813 brooch in Shetelig<sup>59</sup> and can be dated to the Migration Period (AD 400-550/600).

814 In the Schreiner database, both skeletons are described together as being brownish in colour and with  
815 skulls of Nordic type. Russ<sup>54</sup> has separated the material into individual A (VK390) and B (VK391),  
816 but cannot exclude the presence of more individuals. Individual A is a male of 30-50Y; the mandible  
817 from this individual shows massive teeth with massive hypoplasia on the canine teeth. Individual B,  
818 with the most intact crania, is a female, aging 18-30Y. Naumann et al.<sup>60</sup> notes the following isotopic  
819 values from the mandible:  $\delta^{13}\text{C}$ : -20.5, %C: 42.1,  $\delta^{15}\text{N}$ : 11.6, %N: 15.3, C:N: 3.2<sup>55</sup>. A sample from  
820 a 3<sup>rd</sup> molar produced those:  $\delta^{13}\text{C}$ : -21.0, %C: 41.6,  $\delta^{15}\text{N}$ : 9.7, %N: 14.2, C:N: 3.4,  $^{87}\text{Sr}/^{86}\text{Sr}$ : 0.7137.  
821 From individual B, she got the mandible values  $\delta^{13}\text{C}$ : -20.4, %C: 41.1,  $\delta^{15}\text{N}$ : 12.3, %N: 14.5, C:N:  
822 3.3. A sample from a 2<sup>nd</sup> molar produced those:  $\delta^{13}\text{C}$ : -21.1, %C: 39.6,  $\delta^{15}\text{N}$ : 11.0, %N: 14.6, C:N:  
823 2.9,  $^{87}\text{Sr}/^{86}\text{Sr}$ : 0.7109.

824

825 **C23941a-f, A3697, VK389, Telemark, Skien, Bergsland (60/77 Lagmannsgårdshøyden)**

826 Topografisk: Schreinerske arkiv: Schreiner 1927:

827 Askeladden ID: None

828 Coordinates: EU89-UTM zone 33 N6576540 E192556 Year of finding: 1926

829 The finds were made during building work at app. 50 cm depth, below a layer of stone slabs. There  
830 were no traces or reports of a mound on the site. The finds consisted of skeletal remains plus a  
831 spearhead, a frostnail type R. 591 for a horse and a few iron fasteners. The spearhead is of Petersen's  
832 type I and dates according to Petersen to the first half of the 10<sup>th</sup> century<sup>51</sup>; Andrushchuk<sup>53</sup> dates some  
833 of the sword types that occur with the I-type spearhead into the second half of the century; the grave  
834 is therefore dated to within the 10<sup>th</sup> century.

835 In the Schreiner database the skeleton is described as brownish of colour, adult and male.

836

837 **Sør-Trøndelag**

838 **T16298, A4481, VK516, Sør-Trøndelag, Ørlandet, Østråt (Austrått) (82/91)**

839 Askeladden ID 56213-1

840 Coordinates: EU89-UTM zone 33 N7074267 E240441 Year of excavation: 1944

841 This grave find was made during road construction, and was sent in to the Schreiner Collection by  
842 Th Petersen from the university museum in Trondheim. No remains of a mound were reported, but  
843 the burial was overlooking a small bay, where in modern times harbour structures were established.  
844 Two finds are reported: An iron spearhead type R.521, with copper alloy knots, and a highly  
845 fragmented shield boss type R.562. These date the find to the 10<sup>th</sup> century.



846 In the Schreiner Collection Database the skeleton is described as originating from a burial site, and  
847 as being brownish; calvaria and remains of the facial bones are preserved together with a defect lower  
848 jaw, a left humerus and fragments of other bones. The individual is estimated to be male and of adult  
849 age. According to Scheiner catalogue 11, the bones were found together with a spearhead type R.521,  
850 and a shield boss type R.562 from the 10<sup>th</sup> century. The museum archive at NTNU reports Schreiner  
851 to have estimated the age to over 50 Y and the height to 167-168 cm. Schreiner found that the skull  
852 was not of the “typical Iron Age type”, and he finds it to be a mixture between that and “the Trøndelag  
853 Bronze Age type”.

854

855 **T13363, A3699, VK523, Sør-Trøndelag, Bjugn, Melem (Herstaen) (84/-)**

856 Askeladden ID: None

857 Coordinates: EU89-UTM zone 33 N7089516 E239588

Year of excavation: 1926

858 This find was unprofessionally extracted from a large, partly stone-lined chamber grave, oriented  
859 ENE-WSW, inside a cairn. After the extraction, the grave was excavated by a student, B. Irgens  
860 Larsen. Several shards of a very thin-walled ceramic vessel of possible Bronze Age type were  
861 recovered. The grave also contained an unusually thick-walled cranium, which was broken by the  
862 finder. According to the museum archive, Professor Schreiner found that the skull type indicated a  
863 date prior to the Migration Period.

864 The Schreiner database states that the skeletal fragments consisted of a defect calva and minimal  
865 additional remains. The colour is described as greyish, and the skeleton is estimated to be from an  
866 adult female.

867

868 **Nord-Trøndelag**

869 **T2327, A3705, VK548, Nord-Trøndelag, Stjørdal, Kil søndre (220/-)**

870 Coordinates: EU89-UTM zone 33 N7040131 E311368

Year of finding: 1927

871 Askeladden id.: None

872 The remains were found during the construction of a railroad, in bog soil next to a creek. On the  
873 breast of the skeleton were found two well-preserved single shell oval brooches of copper alloy with  
874 riveted, plated knots (T-2293), a brown, opaque glass bead (T-2294) and a clay bead (T-2295). The  
875 glass bead is by Bjørn<sup>61</sup> said to be of amber. The oval brooches are of the type R. 649<sup>62</sup>, which  
876 Petersen<sup>63</sup> dates to the 9<sup>th</sup> century, a dating that Bjørn agrees in.

877 The Schreiner database states that the skeleton is yellowish and well-preserved but not complete. In

Schreiner<sup>58</sup> are listed 50 bones that are preserved, plus the cranium. The skeleton is from a female; no age is determined. The cranium is described as being of Nordic type. According to Bjørn<sup>61</sup>, the height of the female was calculated to 163 cm.

## **Nordland**

### **TS7659, A5195, VK514, Nordland, Steigen, Vikran Nordre (71/2)**

Coordinates: EU89-UTM zone 33 N7533257 E505595                      Year of finding: 1965/66

Askeladden ID:            37739-1

The cranium was found during ploughing a field in 1965, and an archaeological excavation in 1966 produced the remaining parts of a skeleton. The individual was found lying on its left side with flexed legs and the head in SSW. Right arm was extended, with the fingers in front of the knees. A knife was lying at the hand, and another knife plus a composite comb behind the hip. There is no indication that a mound had ever been present over the burial. The composite comb dates the burial to the 6<sup>th</sup> to 10<sup>th</sup> century.

The Schreiner database describes the remains as brownish and well preserved. No sex determination is given, but the age is estimated to 11-13 Y and the body height to 160 cm.

Russ<sup>54</sup> states that sex determination is not possible due to the low age of the individual. The teeth indicate it to be 11Y ± 30M, the rest of the skeleton 10-14Y, and she concludes that the age was presumably 11-12Y. One milk tooth, no. 55, is still in place. Calculus is present on several teeth, but no caries or hypoplasia. Carabellis cusp is observed on tooth 16 and 26. Very weak cribra were present in both eye sockets. Non-metric traits are present on atlas, as two extra bones in the lambdoid suture and a vastus notch on the right patella.

Naumann et al.<sup>60</sup> produced the following isotope results from a sample from a femur:  $\delta^{13}\text{C}$ : -16.8, %C: 42.2,  $\delta^{15}\text{N}$ : 16.3, %N: 16.3, C:N: 3.0<sup>55</sup>. A sample from a 1<sup>st</sup> molar produced those:  $\delta^{13}\text{C}$ : -17.2, %C: 44.7,  $\delta^{15}\text{N}$ : 16.0, %N: 16.3, C:N: 3.2,  $^{87}\text{Sr}/^{86}\text{Sr}$ : 0.7104. Krzewińska, et al. determines the mtDNA HVR1 sequence of this individual to represent haplogroup K1a11<sup>57</sup>.

### **T20545 h:1, A5317, VK526, Nordland, Herøy, Sørherøy (Prestegården, 4/1)**

Coordinates: EU89-UTM zone 33 N7319886 E376306                      Year of finding: 1983

Askeladden ID: 36189-1

The find site is situated next to the Herøy Sound, only 80 m from the beach, and 300 m north of the large Romanesque Herøy church from the 12<sup>th</sup> century. A skeleton was found with one oval brooch

10 cm below the surface during construction works in an area that has yielded several other inhumation burials. During a control excavation after the finding, remains of a further skeleton was found. This had been placed in an E-W direction, with the head towards W. A 1.2 x 1.6 m large dark coloring of the sandy subsoil indicates the presence of a wooden coffin or grave lining. It seemed that that the deceased had been laying in a hocker position. There were no indications of a mound present. The finds from the excavation included wooden remains, iron nails and rivets, animal bones, another oval brooch of the same type as found with the first individual, R.647, variant B<sup>63</sup>, a knife and textile fragments from the brooches. The two brooches did differ in design, but may indicate that both skeletons came from the same burial, and dates them to the 9<sup>th</sup> century<sup>63</sup>.

According to the osteological investigation following the excavation, both skeletons were from young females. The poorer preserved one (A5316) was by Schreiner estimated to originate from a 17-18 Y old woman, while the better preserved one (A5317) was judged as belonging to a 12-13 year old female, an interpretation also found in the Schreiner database, where the bones are described as yellowish.

Russ<sup>54</sup> found that A5317 belonged to a younger individual early in puberty, with an age of 12-17 Y, most likely between 13-15 Y. Due to young age it is not possible to determine the sex with certainty, but traits on the hip bone indicate female sex. Some cribra orbita, mostly in the left eye socket, and traces of healed cribra in the right one were the only pathologies found. Several non-metric traits were recorded: extra bones in the sutures, especially lambdoid ossicles and an eptiteric bone. The mtDNA HVR1 sequence of this individual represented haplogroup J1d/J2b<sup>57</sup>.

**T5105, A0642, VK529, Nordland, Steigen, Leines (6/-)**

Coordinates: EU89-UTM zone 33 N7513575 E491831                      Year of finding: Before 1897

Askeladden ID: None

This skeleton was given by Sheriff Olaf Olsen to Trondheim University Museum with the information that it had been found on the farm Leines in Ledingen parish, Nordland. Together with the skeleton had been found two single-edged swords of the types R. 491 and R. 500, a celt type R. 401, two whetstones, and a possible sickle. The sword type R. 491 is equivalent with Petersens type C, which Androshchuk<sup>53</sup> dates to the early Viking Age, AD 750-870. The celt and the R. 500 sword may indicate an earlier date.

The Schreiner database describes the skeleton as well preserved, brownish, and belonging to an adult man. Schreiner in 1927 lists its preserved parts and describes them as from a male<sup>58</sup>.

942 In 2013, Russ<sup>54</sup> describes the few remains as well preserved, and suggest that they belong to a male  
 943 of 24-30 Y of age. A slight cribra is present in both eye sockets; the teeth show calculus. The spine  
 944 shows small osteophytes and the muscle fastenings, especially on the thigh bone.  
 945 Naumann<sup>55</sup> measured the following isotope values on a sample from a tibia:  $\delta^{13}\text{C}$ : -18.3, %C: 43.0,  
 946  $\delta^{15}\text{N}$ : 15.0, %N: 15.0, C:N: 3.3. A sample from a 2<sup>nd</sup> molar produced those:  $\delta^{13}\text{C}$ : -17.7, %C: 43.6,  
 947  $\delta^{15}\text{N}$ : 13.8, %N: 15.9, C:N: 3.2,  $^{87}\text{Sr}/^{86}\text{Sr}$ : 0.7109. She suggests that marine foods played a significant  
 948 role in the man's childhood, but that his consumption of freshwater fish and/or terrestrial predators  
 949 increased in the later part of his life.  
 950 Krzewińska, et al.<sup>57</sup> found the mtDNA HVR1 sequence of this individual to represent haplogroup  
 951 H\*.

952

953 **Ts5287, A4691B, VK519, Nordland, Steigen, Steigen Mellem (78/- Hagbartsholm)**

954 Askeladden ID: 7944

955 Coordinates: EU89-UTM zone 33 N7535488 E498506

Year of finding: 1954

956 This find is from an excavation of a Migration Period-Viking Age burial site, carried out by H.E.  
 957 Lund, Tromsø museum, in 1954. The individual is from grave X, and the finds included fragments of  
 958 a three-layered, composite antler or bone comb with linear ornaments and a five iron nails with  
 959 adhering wood plus some charcoal. The comb dates the burial to the 6<sup>th</sup>-10<sup>th</sup> century.

960 The Schreiner database describes the few remains of the skeleton as brownish of colour, adult of age,  
 961 and of undetermined sex. The skull is categorized as Nordic. A small iron ring is mentioned as grave  
 962 goods, an object which does not occur in the archaeological record of the find.

963 Russ<sup>54</sup> estimates the skeleton to be female, based on the crania and the femur joints. Age is determined  
 964 to 25-30Y, based on limited teeth wear. An enamel hypoplasia is observed on dx maxilla canin, and  
 965 on the left femur an exostos on the neck of the left femur, behind the head.

966 Naumann<sup>55</sup> has measured the following isotope values<sup>55</sup>: Femur:  $\delta^{13}\text{C}$ : 19.1, %C: 43.8,  $\delta^{15}\text{N}$ : 13.8,  
 967 %N: 15.4, C:N: 3.3. A 1<sup>st</sup> molar produced:  $\delta^{13}\text{C}$ : -17.2, %C: 47.4,  $\delta^{15}\text{N}$ : 15.8, %N: 17.9, C:N: 3.1,  
 968  $^{87}\text{Sr}/^{86}\text{Sr}$ : 0.7106.

969

970 **Ts4306, A4511 and A4512, VK515 and VK530, Nordland, Bodø, Rønvik nedre (32/100,**  
 971 **Rønvik)**

972 Askeladden ID: None

973 Coordinates: EU89-UTM zone 33 N7462971 E473589

Year of finding: c 1946

974 These two graves were found about 20 m apart, and *c* 70 m from the beach, and it is unknown which  
 975 skeleton belonged to each grave. One was found in a very shallow grave, only 20 cm below the turf,  
 976 and contained, apart from the human remains, a three-layered bone or antler comb and a needle house  
 977 of bone of type VGJ 492, a miniature sword of bone or wood of a shape like Petersen type V, plus  
 978 some possible chest mounts of iron. Androshchuk<sup>53</sup> dates the V-type to around AD 1000, which might  
 979 be a fair guess of the date of the amulet as well. The other burial, which was 180 cm deep and covered  
 980 with stones, also contained human remains together with a sword of Petersen's Y-type, and a  
 981 spearhead of Petersen's G-type plus a shield boss of the type R. 563. Androshchuk<sup>53</sup> dates the Y-sword  
 982 to AD 900-975, and Petersen<sup>51</sup> dates the spearhead to the second half of the tenth and the early 11<sup>th</sup>  
 983 century. This grave thus can be dated to the middle or second half of the tenth century. Since the  
 984 burials both date to the second half of the 10<sup>th</sup> century or perhaps slightly later, both skeletons can  
 985 also be assigned to this date.

986 VK 515 (A4512): The Schreiner database states that the skeleton is brownish of colour and originates  
 987 from a young male of adult age, with a Nordic type skull. Russ<sup>54</sup> also determines the skeleton to be  
 988 young and male on the basis of DSP of the coxae, less so of the cranium. Remains of milk teeth roots  
 989 are still present, but all molars have erupted; there are several examples of enamel hypoplasia. On the  
 990 basis of the teeth and the fusion of the epiphyses, the age is estimated to 18-20Y. The strong  
 991 development of clavícula and the forearm bones indicates strong physical labour.

992 Naumann et al.<sup>60</sup> have measured isotope values: A femur gave  $\delta^{13}\text{C}$ : -16.00, %C: 41.2,  $\delta^{15}\text{N}$ : 16.8,  
 993 %N: 15.0, C:N: 3.2<sup>55</sup>. A sample from a 1<sup>st</sup> molar produced  $\delta^{13}\text{C}$ : -18.6, %C: 43.5,  $\delta^{15}\text{N}$ : 14.3, %N:  
 994 15.6, C:N: 3.3,  $^{87}\text{Sr}/^{86}\text{Sr}$ : 0.7130. Krzewińska, et al.<sup>57</sup> found that the mtDNA HVR1 sequence of this  
 995 individual was estimated to represent haplogroup H\*.

996 VK 530 (A4511) is described in the Schreiner database as brownish and being from an adult male of  
 997 35-35Y of age. The skull is said to be of Nordic type. Some animal bones were found together with  
 998 the human remains. Russ<sup>54</sup> finds that the features of the cranium are indecisive, but that a humerus  
 999 measurement indicates it to be a female. The lambdoid suture between occipitale and parietale is  
 1000 indented and irregular, and a light porosity can be seen on the occipital. Based on tooth wear she  
 1001 suggest an age of 25-35Y, which is not contradicted by the state of the bones. The four incisors and  
 1002 the canines in the mandible show signs of lack of space. An abscess has caused the loss of premolar  
 1003 dx maxilla and damaged the bone around pm2.

1004 Naumann et al.<sup>60</sup> have measured the isotope values of a 3<sup>rd</sup> molar:  $\delta^{13}\text{C}$ : -19.8, %C: 42.4,  $\delta^{15}\text{N}$ : 11.3,  
 1005 %N: 14.6, C:N: 3.4<sup>55</sup>. Krzewińska, et al.<sup>57</sup> found the mtDNA HVR1 sequence of this individual to

1006 represent haplogroup H\*.

1007

1008 **Ts5252, A4689, VK518, Nordland, Værøy, Nordland, (17/- Vågehamn)**

1009 Askeladden ID: 59407

1010 Coordinates: EU89-UTM zone 33 N7510519 E402848

Year of finding: 1954

1011 The site is situated on the N end of the small island Værøy S of Lofoten, facing very rich fishing  
1012 waters, but also one of the world's strongest whirlpools, Moskstraumen. The human remains originate  
1013 from a grave with eight different individuals, buried at the same occasion. The grave was situated c  
1014 50 m from the beach, 4-5 m a.s.l. and was first discovered through the digging of a trench for a water  
1015 pipe in August 1954. The remaining part of the grave was dug out in October the same year. It was  
1016 reported that altogether remains of eight individuals were found, but detailed information is only  
1017 available on the three of them. All remains were found inside a rectangular stone lining, oriented E-  
1018 W and measuring 3.1 m in length and about one metre wide. It was not marked above ground. In the  
1019 eastern part of the burial three parallel skeletons were found with their heads towards the east: In the  
1020 northern side a child was lying facing north with some animal bones at the breast. In the southern  
1021 side a male individual was lying on his back with his knees towards south and with an axe above his  
1022 head; and in the middle a richly equipped female was placed with a number of dress accessories. In  
1023 the western end of the burial another five persons with equipment were reported.

1024 Among the burial goods the following items dates the burial: Two axe heads of Petersen type D and  
1025 E, which according to Petersen<sup>51</sup> appears with sword types that Androshchuk et al.<sup>53</sup> date to the mid-  
1026 9<sup>th</sup> to 10<sup>th</sup> century; further two type C swords, which Androshchuk dates to the early Viking Age, AD  
1027 750-870. An oval brooch of type R. 647 is from the 9<sup>th</sup> century<sup>63</sup>, and the same date – with an  
1028 emphasis on the early part of that century – is stipulated for a Berdal A type oval brooch also found  
1029 in the grave<sup>63</sup>. The burial thus seems to have taken place around the middle of the 9<sup>th</sup> century.

1030 The Schreiner database describes the find under number A4689a, while A4689b is unrelated. It states  
1031 that post-cranial bones from A4684 – but no cranium – have been intermixed with 4689a. Only one  
1032 cranium is mentioned, and it is identified as female; this is the one that was sampled for VK518.

1033 Russ has been examining the human remains stored under A4689 in the Schreiner Collection and  
1034 found the remains of four individual, which probably reflects the three from the October 1954  
1035 excavation, plus the A4684 individual<sup>54</sup>. She found one female – only represented through a cranium  
1036 – and three males, one of these being only 16-20Y. The female was, based on suture and teeth wear  
1037 status, determined to be 25-40Y old.

1038  
1039 **T9366-9379, A3708, VK524, Nordland, Nesna, Tommeidet (98/22)**

1040 Askeladden ID: 16512-1

1041 Coordinates: EU89-UTM zone 33 N7351266 E397879 Year of finding: c 1910

1042 This boat burial was found in one of several mounds overlooking a natural harbour on the W tip of  
1043 the island Tomme. Remains of two individuals were found in the burial, placed side by side in the  
1044 SW-NE orientated boat. Horse- and cattle bones were found in the NE end of the grave<sup>64</sup>. Among the  
1045 rather rich grave goods, the following datable items were found: A couple of oval brooches of copper  
1046 alloy, of the type R. 652, which Petersen dates from the late 9<sup>th</sup> to the late 10<sup>th</sup> century<sup>63</sup>; a trefoil  
1047 brooch type R. 671, a model which is also elsewhere found with R. 652<sup>63</sup>; four beads of black glass  
1048 with white bands and white, red and green dots in glass added to the surface, datable to the #?#; a  
1049 sword described as similar to R. 495, but with a smaller top rather than a regular knob on the upper  
1050 end – this sounds like a type P or Y sword, dated by Androschuk<sup>53</sup> to the late 10<sup>th</sup> century; a shield  
1051 boss type R. 562 dates according to Petersen<sup>51</sup> to 850-950; and an axe type R. 552, which Petersen  
1052 finds together with swords of the B, C, E and H type; only the H-type of these continues into the 10<sup>th</sup>  
1053 century. The grave can probably be dated to the middle of the 10<sup>th</sup> century.

1054 The Schreiner database describes the human remains as greyish and the skull type as Nordic. The  
1055 materials first came to the Anatomical Institute in 1927, probably when Schreiner was doing his  
1056 survey for the Oseberg publication. The preserved remains from a male and a female are listed in  
1057 Schreiner<sup>58</sup>. Russ could not identify any remains of the woman<sup>54</sup>. The surviving remains are from a  
1058 male (cranium and DSP), 35-50Y old. The cranium shows a severe case of sinusitis frontale, which  
1059 is suggested to have caused the man's death. Further spina bifida occulta was observed on sacrum,  
1060 with arcus missing on 4 and 5. Left femur shows evidence of non-malignant bone cancer. Krzewińska,  
1061 et al.<sup>57</sup> determines the mtDNA HVR1 sequence to represent haplogroup HV0.

1062  
1063 **T12578, A3709, VK525, Nordland, Dønna, Hov (19/1, Løkta)**

1064 Askeladden ID: 73294

1065 Coordinates: EU89-UTM zone 33 N7342211 E397137 Year of finding: 1922

1066 This site is situated only 50 m from the current beach, overlooking an open, stony bay facing ENE.  
1067 The find was made during the digging of a trench for a water pipe to a farm building. The finds from  
1068 this burial are few, including a knife and a sickle, plus two oval brooches of types R. 647 and R649,  
1069 the latter datable to the 9<sup>th</sup> century<sup>63</sup>.

1070 In the Schreiner database the find is described as brownish and originating from an adult woman with  
1071 a skull of Nordic type. It is more fully described in Schreiner<sup>58</sup>. Russ<sup>54</sup> finds it to belong to a female,  
1072 25-30Y of age, based on tooth wear. The skeleton is described as poorly preserved, but very gracile.  
1073 Some skeletal parts from the upper breast region are coloured green by copper alloy, demonstrating  
1074 that at least one of the oval brooches most likely had been positioned here. The following pathological  
1075 features were recorded: A double facet on the atlas, and a type B deformation of its posterior arch.  
1076 Calculus was prominently present and caries was found on two teeth. M1, sin, showed an abscess,  
1077 and there were found indications of enamel hypoplasia.

1078 Naumann et al.<sup>60</sup> got the following isotopic values: A sample from a femur produced the following  
1079 isotope results:  $\delta^{13}\text{C}$ : -20.4, %C: 43.8,  $\delta^{15}\text{N}$ : 11.0, %N: 15.7, C:N: 3.2<sup>55</sup>. A sample from a 1<sup>st</sup> molar  
1080 produced those:  $\delta^{13}\text{C}$ : -20.2, %C: 54.5,  $\delta^{15}\text{N}$ : 11.3, %N: 16.6, C:N: 3.2,  $^{87}\text{Sr}/^{86}\text{Sr}$ : 0.7092.

1081

1082 **C18558, A253, VK388, Nordland, Lødingen, Ytterstad (17/-)**

1083 Askeladden ID: None

1084 Coordinates: EU89-UTM zone 33 N7580530 E527347 (farm) Year of finding: 1889

1085 The skeleton was found in a small mound at the farm Ytterstad, about 500 m from the beach. The  
1086 farm is on the N side of a well sheltered bay facing E and overlooking the mouth of Tjeldsunde, a  
1087 part of the inner sailing route along the Norwegian coast. The only accompanying object was an  
1088 unidentified, ornamented antler tool. The ornaments indicate a date to the Viking Age or Middle  
1089 Ages, but the burial type excludes the latter. The skeleton was initially identified as female, but was  
1090 later determined to be a young male by Schreiner<sup>58</sup> who also notes that several of the metatarsals  
1091 showed pathological changes.

1092 Russ<sup>54</sup> describes the skeleton as quite complete, but poorly preserved and belonging to a young male  
1093 age 15-17Y. The rearmost molar had erupted, but most epiphyses in the post-cranial skeleton had not  
1094 yet fused. Coxae could not be used for sex determination due to young age, but the cranium allowed  
1095 a certain identification. Unhealed cribra was found in both cranial orbits. Both feet and legs are  
1096 showing patological possibly from a severe, enduring inflammation which might have caused the  
1097 individual's death.

1098 Naumann et al.<sup>60</sup> have recorded the following isotope results from a femur:  $\delta^{13}\text{C}$ : -17.8, %C: 45.5,  
1099  $\delta^{15}\text{N}$ : 14.9, %N: 16.5, C:N: 3.2<sup>55</sup>. A sample from a 1<sup>st</sup> molar produced:  $\delta^{13}\text{C}$ : -20.5, %C: 38.5,  $\delta^{15}\text{N}$ :  
1100 12.5, %N: 12.4, C:N: 3.6,  $^{87}\text{Sr}/^{86}\text{Sr}$ : 0.7175.

1101



1102 **C14554-14557, A1522, VK419, Nordland, Bodø, Rønvik Øvre (31/-)**

1103 Askeladden ID: None

1104 Coordinates: EU89-UTM zone 33 N7463888 E475796

Year of finding: 1889

1105 This burial was found in shell sand in what had earlier been a gentle slope towards the nearby beach,  
1106 but which had been eroded at the time of finding. There was no memory of a mound on the site. The  
1107 grave itself were found below two stone slabs, 1.0 and 0.7 m long, which were lying in the topsoil.

1108 Apart from the skeletal remains, the grave held an axe of Early Iron Age type, but with similarities  
1109 with Petersen's type C axe without 'beard', a large scythe type R. 386 and a sickle possibly of type  
1110 R. 385. C-type axes are often found with H-type swords, which Androshchuk<sup>53</sup> dates to up to AD  
1111 950. The burial cannot be dated more closely than Migration Period to Early Viking Age.

1112 The Schreiner database states that the skeleton is brownish in colour and from an adult male; its crania  
1113 is described as being of Nordic type; the preserved bones are listed in Schreiner<sup>58</sup>. Russ<sup>54</sup> suggests  
1114 that the individual is most likely a young man, 17-25Y, based on sutures, tooth wear and epiphyses<sup>54</sup>.  
1115 Naumann et al.<sup>60</sup> analysed a sample from a femur which produced the following isotope results:  $\delta^{13}\text{C}$ :  
1116 -17.7, ‰C: 43.0,  $\delta^{15}\text{N}$ : 14.5, ‰N: 15.1, C:N: 3.3<sup>55</sup>. A sample from a 2<sup>nd</sup> molar produced those:  $\delta^{13}\text{C}$ :  
1117 -19.0, ‰C: 47.8,  $\delta^{15}\text{N}$ : 12.8, ‰N: 16.9, C:N: 3.3,  $^{87}\text{Sr}/^{86}\text{Sr}$ : 0.7109. Krzewińska, et al.<sup>57</sup> estimated the  
1118 mtDNA HVR1 sequence to represent haplogroup U1/U5a.

1119

1120 **C18035-18039, A1502, VK418, Nordland, Steigen, Steigen øvre (77/1)**

1121 Askeladden ID: None

1122 Coordinates: EU89-UTM zone 33 N7535744 E499177

Year of finding: c. 1894

1123 The find was made during drainage work on the present-day cemetery of Steigen, only about 300 m  
1124 from the rather marshy coast. There are several Iron Age cemeteries in the surrounding area. It  
1125 produced a weapon equipment, which has been argued to be of eastern origin<sup>65</sup>. A shield boss type  
1126 R. 221, two spearheads of Rygh's type 206 and 211, and a sword with a decorated scabbard mounting  
1127 dates this find firmly in the Early Iron Age, according to Sjøvold in the late 4<sup>th</sup> century.

1128 The Schreiner database describes the skeleton as brownish and from an adult male with a cranium of  
1129 Nordic type. The extent of the remains are described in Schreiner<sup>58</sup>.

1130

1131 **Ts5656, A4727, VK547, Nordland, Tjelsund, Stokke (79/1)**

1132 Coordinates: EU89-UTM zone 33 N7604398 E557131 sogn Lødingen

Year of finding: 1957

1133 Askeladden id.: 47377-1

1134 The burial was found through the digging of a cable ditch, straight downhill 15 m N of the main  
1135 building of the farm and 1 m N of the road between Sandnes and Kjærstad. The site is situated *c* 150  
1136 m E of Hol church, at Tjelsundet. A professional excavation of the remaining part of the burial was  
1137 conducted by curator Simonsen from Tromsø Museum.

1138 The grave was not marked on the surface, and the burial pit, dug in shell sand, was without stones  
1139 and in the shape of a trough. It measured 30-50 cm in depth, and was 60 cm wide and 130 cm long.  
1140 It was oriented E-W, and the body was lying on its side, with the head towards E, facing N, and with  
1141 flexed legs. The sparse grave goods were found at the back of the legs, in the grave's SW corner.  
1142 They consisted of an auger of iron and a possible awl of iron with a wooden handle. Further three  
1143 iron tacks with wooden remains comes from an unidentified object. The finds can be dated no closer  
1144 than to the Viking Age.

1145 In the Schreiner database, the skeleton is described as yellowish and well-preserved. The age of the  
1146 individual, who is determined to be male, has been estimated to 45-55 Y, and the body height to 180  
1147 cm. The cranium is described as being of Nordic type.

1148

1149 **Troms**

1150 **Ts3639, A4184, VK520, Troms, Tromsø, Tussøy, (188/1)**

1151 Askeladden ID: None

1152 Coordinates: EU89-UTM zone 33 N7729512 E621341

Year of excavation: 1935

1153 The smallholder Hjalmar Brox and his son Albert discovered this grave when digging in a small  
1154 mound located *c.* 7 m a.s.l., *c.* 100 m W of the farmstead. On the behalf of Tromsø Museum a student,  
1155 H. Haldorsen, excavated a 7 x 4 m large section of the mound and found evidence of three individuals,  
1156 of which A4184 is individual III. Individual I and II had apparently been buried simultaneously, and  
1157 from the grave equipment (weapons and tools) they were identified as male and buried in the 8<sup>th</sup>  
1158 century; no human remains were reported salvaged. A4184 was in the grave first discovered by Brox,  
1159 who had disturbed it severely, but the body had apparently been lying with the head towards west.  
1160 The cranium and a few other bones were recovered from the burial together with two oval brooches  
1161 of the types Rygh 652 and Rygh 654<sup>62</sup>, found in the breast region. The grave dates according to  
1162 Gjessing to the 10<sup>th</sup> century<sup>66</sup>.

1163 In the Schreiner Collection database the skeleton no. A4184 is described as well-preserved but  
1164 incomplete and brownish in color. It is stated that it consists of a “very defect and deformed calva  
1165 with associated right, defect upper jaw with cheek bone, plus a few further bones”. The skeleton is

1166 judged to be from an adult female with a skull of Nordic type.  
1167 Russ<sup>54</sup> describes the skeleton as poorly preserved and with only few skeletal parts present. Age  
1168 determination based on the 3<sup>rd</sup> molar is 11-17 Y, while the remaining material indicates 12-19Y, most  
1169 likely 16-18Y. Due to the young age, sex determination is uncertain, but features at the cranium  
1170 indicate female. Apart from some calculus and a possibly caries in one canine tooth, no pathological  
1171 features were observed.

1172

1173 **Ts3525, A4049, VK528, Troms, Tromsø, Tussøy, Trygstad i Bø (188/10)**

1174 Askeladden ID: 27358-1

1175 Coordinates: EU89-UTM zone 33 N7730580 E622625                      Year of excavation: 1933

1176 A4049 was handed in to Tromsø museum by a local from Tussøy, Tryggve Sletten, and he appears  
1177 to be the source for the contextual information. The find was made 40-50 cm below the surface, at a  
1178 place near a stream, 5-6 m a.s.l. The distance to the sea shore is c 50 m. The find included a skeleton  
1179 in a supine position with the head towards W. It had a sword of Petersen's type C<sup>51</sup> on its right hand  
1180 side and an axe on the left; supposed animal bones were also found at its side. Further finds from the  
1181 grave were two arrowheads, a large, four-sided hone of slate, fragments of a knife, an iron staple and  
1182 a decorated bone comb of type Rygh 447<sup>62</sup>. At the head and foot end of the grave, stone heaps were  
1183 found, and 5-10 m from the grave, towards the river, charcoal and other unspecified material. Gjessing  
1184 dates the grave to AD 800-850<sup>66</sup>, but Androschchuk dates the C-type swords to the wider range AD  
1185 750-870<sup>53</sup> and the comb would fall into Ashby's Type 5, which broadly dates from the 8th to the mid-  
1186 10th century<sup>67</sup>; Gjessing's narrow dating interval may thus be expanded to AD 750-870.

1187 In the Schreiner Collection Database A4049 is described as a yellowish, well-preserved, incomplete  
1188 skeleton with a defect cranium. The skeleton is estimated to be male and senilis, around 60 Y of age  
1189 and with a skull of Nordic type. The body height is, following Trotter and Gleser, estimated to 179  
1190 cm.

1191 In her examination of the rather well preserved skeleton in 2013, Russ estimated A4049 to be a male,  
1192 40-60 years of age. Of pathological features, she recorded several severe examples of lipping on the  
1193 vertebrae, especially in the lower back. A 28 mm long and 7-8 mm deep cut in the breast bone may  
1194 be peri- or postmortem. Non-metric traits were three ossicles at lambda and several more in the  
1195 lambdoid suture, and vastus notch in both patella<sup>54</sup>.

1196 A sample from a femur produced the following isotope results:  $\delta^{13}\text{C}$ : -16.0, %C: 44.4,  $\delta^{15}\text{N}$ : 17.3,  
1197 %N: 15.5, C:N: 3.3. A sample from a 1<sup>st</sup> molar produced those:  $\delta^{13}\text{C}$ : -19.9, %C: 44.8,  $\delta^{15}\text{N}$ : 12.3,

1198 %N: 15.3, C:N: 3.4,  $^{87}\text{Sr}/^{86}\text{Sr}$ : 0.7118<sup>55</sup>. Naumann et al.<sup>60</sup> points out that the  $^{87}\text{Sr}/^{86}\text{Sr}$  value differs  
1199 from known local values, indicating that the individual grew up at a different place than Tussøy. They  
1200 further suggest a very significant change in diet from terrestrial to highly marine food in later part of  
1201 life. Among 33 Merovingian and Viking age individuals from Northern Norway, analysed by  
1202 Naumann et al.<sup>60</sup>, A4049 was one of those digesting the most marine diet in his late years, while his  
1203 childhood diet was among the most terrestrially dominated in the study.  
1204 Krzewinska et al.<sup>57</sup> estimate the mtDNA HVR1 sequence of this individual to represent haplogroup  
1205 K\*.  
1206

1207 **Ts---- , A5001a, VK531, Troms, Lenvik, Skarsvåg (94/2)**

1208 Askeladden ID: 48876-1

1209 Coordinates: EU89-UTM zone 33 N7709381 E617444

Year of excavation: 1964

1210 No museum number is recorded for this skeleton, but information can be found in the archives of  
1211 Tromsø museum, file 214/64, and under accession number 1964/104. The grave was situated above  
1212 the natural harbour Skarsvågen at the NW end of the island Senja, overlooking the inner sailing route  
1213 along the Norwegian coast. It was archaeologically excavated by P. Simonsen in 1964, who found no  
1214 objects in the grave and no indications of a mound above. From the grave form, Simonsen dated it to  
1215 Viking Age, or perhaps a little earlier. However, recent  $^{14}\text{C}$  dating results showed that the sample was  
1216 much older than initially thought ( $^{14}\text{C}$  date: 3918+/-36).

1217 In the Schreiner Collection Database, the skeleton is described as well-preserved but incomplete, with  
1218 a skull. It is said to be of varying color and is estimated to be of a male, senilis 55-65 Y of age. The  
1219 skull is said to be of Nordic type.

1220

1221

1222

1223

1224

1225

1226

1227

1228

1229

1230 **Ukraine**  
1231 **Inna Potekhina, Institute of Archaeology of the National Academy of Sciences of**  
1232 **Ukraine**

1234 **Chernihiv city, Chernihiv oblast (region), Ukraine**

1235 Relevance for the Vikings: Rurik dynasty.

1236 Gleb Svyatoslavich, «Gleb, son of Sviatoslav» (in Ukrainian and Russian languages endings -ovych,  
1237 -evych after the name have a meaning «son of») was the 11<sup>th</sup> century prince of Tmutarakan/Novgorod,  
1238 aged 25-35 according to anthropologist analysis.

1239 Sources of information: Skull was found in 1967 in a tomb (stone sarcophagus) near the Saviour's  
1240 Chernihiv cathedral (Fig. S1.3). It was an accident finding during construction works on the territory  
1241 of State historical and cultural reserve «Chernihiv Starodavniy» (Ancient Chernihiv).

1242

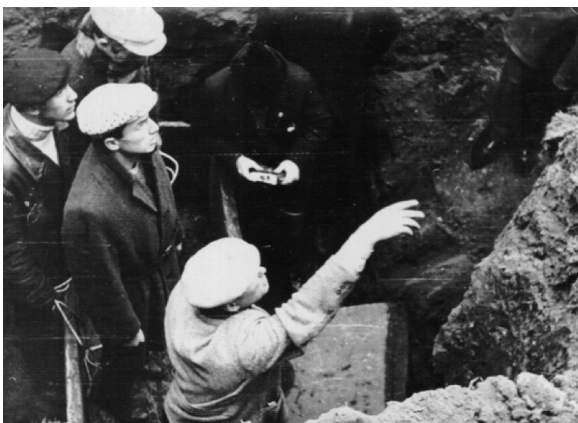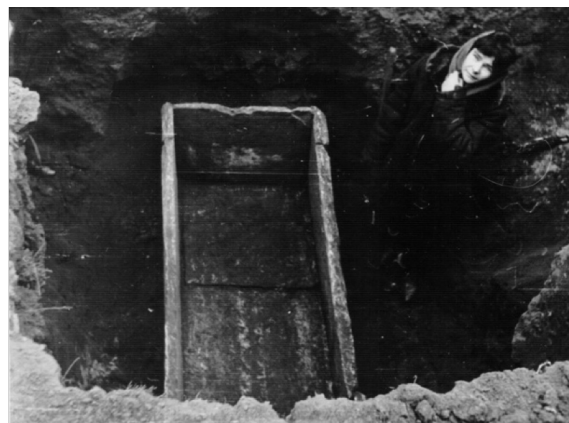

1243  
1244 **Fig. S1.2:** Photos from scientific archives of State historical and cultural reserve «Chernihiv  
1245 Starodavniy».

1246

1247 Prior to the date of finding there was no institution in Chernihiv (USSR) which could professionally  
1248 make all the archeological data and stratigraphy. Therefore, there are no archeological reports of these  
1249 findings in archives. The skull was sent to Moscow and returned back in a wooden box. For many  
1250 years, it laid in this box in the archives and was rediscovered for science only in 2016.

1251 Coordinates: WGS84: 51° 29' 20.45" N, 31° 18' 28" E; 51.489014°, 31.307778°

1252

1253 Dating (archeological only): The sarcophagus was found in the backyard of the cathedral. The depth  
1254 of the upper plate of the sarcophagus is 1.9-2.0 meters from modern surface (Fig. S1.2). Stratigraphy  
1255 is slightly damaged by the later breach of the soil: water supply pipes are laid 0.2 m above the

1256 headboard of sarcophagus. Archeologists date it to 11<sup>th</sup> century.

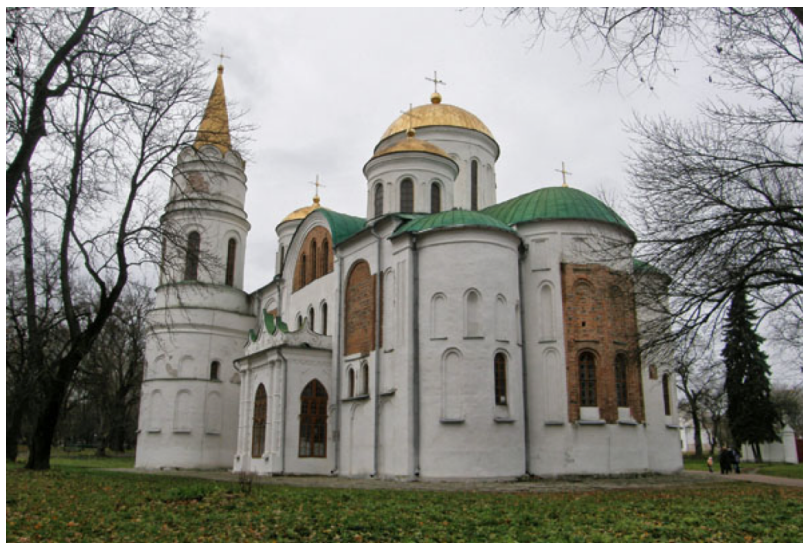

1257  
1258 **Fig. S1.3:** Saviour's Chernihiv cathedral (11<sup>th</sup> century). Modern view of the cathedral and a backyard  
1259 where sarcophagus was found.

1260

1261 Anthropological data: aged 25-35 years, traces of sword wounds are preserved on the skull. All  
1262 anthropological measurements and indexes are in the article<sup>68</sup>.

1263

1264 Samples used for DNA analysis

1265 VK542 Ukraine\_Chernigov

1266

1267 **Lutsk city, Volyn oblast (region), Ukraine**

1268 Relevance for the Vikings: Rurik dynasty

1269 Izjaslav Ingvarevych, «Izjaslav, son of Ingvar» (in Ukrainian and Russian languages endings -ovych,  
1270 -evych after the name have a meaning «son of») was 13<sup>th</sup> century prince of Dorogobuzh, Principality  
1271 of Volhynia/Galicia, aged 30-40 according to anthropologist analysis.

1272 Sources of information: Skull was found in 1989 in a tomb on the territory of Lutsk castle (Figs. S1.4  
1273 and S1.5).

1274 Archeology report is located in scientific archive of Lutsk State historical and cultural reserve  
1275 (Научный архив Государственного историко-культурного заповедника города Луцк). Archive  
1276 number: 203, 51 pages. Coordinates: WGS84: 50° 44' 20" N, 25° 19' 23" E; 50.738889°, 25.323056°

1277

1278

1279  
1280  
1281

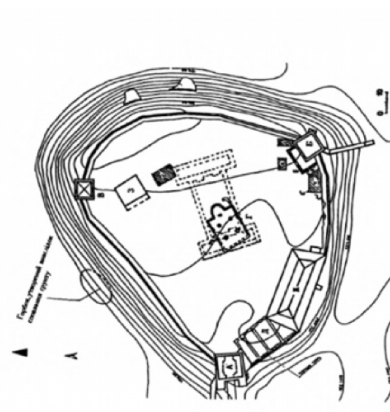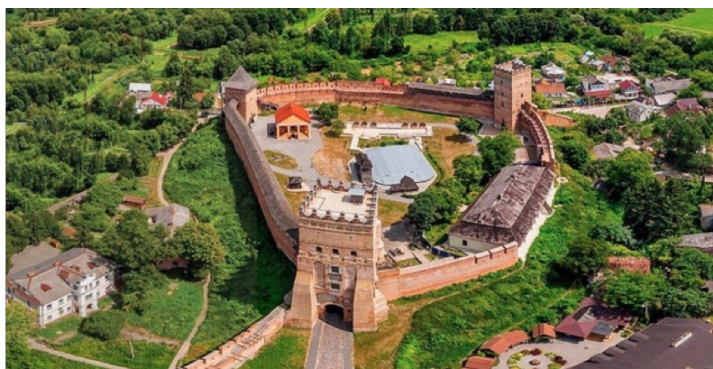

1282  
1283  
1284  
1285  
1286

**Fig. S1.4:** Lubart's Castle, ruins of old Rus church (12<sup>th</sup> -13<sup>th</sup> century) on the territory of the castle. Today the ruins of the church and tomb are covered with metal construction (in the center of the castle) with inner access.

Dating (archeological only): given to the same church building material used for the construction of the burial chamber and stratigraphy data, burial can be dated to the end of XII - beginning of XIII century. Anthropological data: aged 30-40, traces of stab wounds are preserved on the skeleton, at the moment of finding in 1989 archeologists observed an arrowhead stuck in the skull. All anthropological measurements and indexes are in the article<sup>69</sup>.

1292

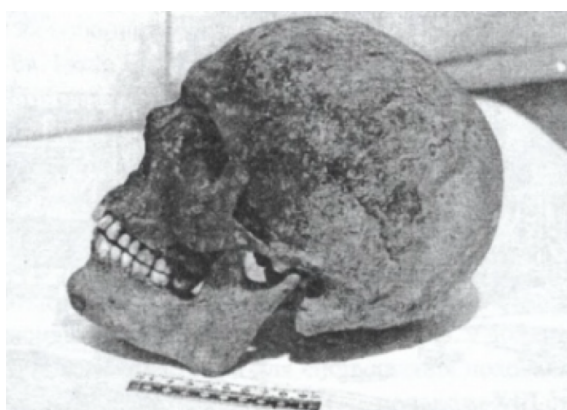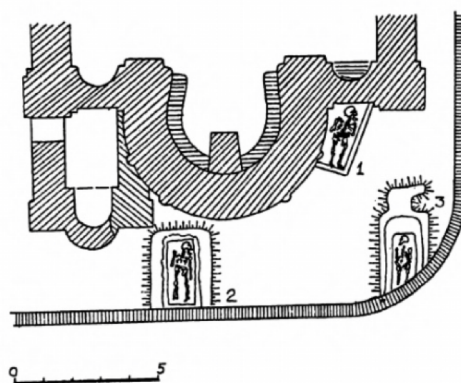

1293  
1294

**Fig. S1.5:** Photo of the skull, year 1989 (left) and the schematic drawing of the tombs (right). No: 2 is Izjaslav's tomb.

1297



1298 Samples used for DNA analysis

1299 VK541 Ukraine\_Lutsk

1300

1301 **Shestovitsa, Ukraine**

1302 The cemetery Shestovitsa refers to the archaeological complex of the IX-XII century, which consists  
1303 of a hillfort and numerous burial mounds. It is located in the Korovel tract, near the village of  
1304 Shestovitsa, on the right bank of the Desna river (the tributary of the Dnieper river), 12 km south-  
1305 west from the city of Chernigov<sup>70</sup>. Coordinates are 51 ° 21'59.17 " N, 31 ° 10'46.04 " E, the altitude  
1306 above the sea level is 116 m.

1307 The first excavations of Shestovitsa were carried out in 1925-1927 by P.I.Smolichev. Since 1948 the  
1308 research of the hillfort and the cemetery was resumed. The cemetery consists of several hundred  
1309 burial mounds with a varied funerary rite. By now, more than 160 burial mounds have been excavated,  
1310 including more than 60 with the cremation rite, more than 50 - with the inhumation rite, and the same  
1311 number with the cenotaphs. Most of the burial mounds date back to the 10<sup>th</sup> -11<sup>th</sup> centuries, and only  
1312 a few - the 12<sup>th</sup> century. In many cases, collective burials containing from 2 to 9 skeletons of men,  
1313 women and children were found. Among the buried there are warriors with weapons and fighting  
1314 horses. Rich burial inventory often included things of Scandinavian origin: weapons (battle axes,  
1315 swords, spearheads, daggers, quivers with arrows); ornaments and household items (knives, combs,  
1316 stucco and pottery); remnants of clothing, fasteners, brooches; Arabic and Byzantine coins. In  
1317 Shestovitsa, apparently, the squad of the Kiev prince was deployed, in which Varangian soldiers were  
1318 also members. Since the 1990s Shestovitsa archaeological complex is recognized by historians as one  
1319 of the largest settlements of Vikings in Europe.

1320 The question of the anthropological composition of the buried in Shestovitsa is debated. Earlier, the  
1321 researchers attributed them to the Slavs, emphasizing a slight eastern component on the basis of  
1322 flattening of the face in some male skulls. However, the weak horizontal profiling of the face here is  
1323 not accompanied by other signs of eastern origin, which allows to deny the presence of a Mongoloid  
1324 craniological complex and suggests the influence of the Finnish or laponoid component. The presence  
1325 of immigrants from the Finno-Ugric lands in this region is consistent with the chronicle and  
1326 archaeological data. It was also suggested that the Norman (Germanic) morphological component is  
1327 mixed here with the Slavic. Some researchers refer the series from Shestovitsa to the Scandinavian  
1328 cluster and find it remote parallels in the synchronous population of Sweden and Britain.

1329 Despite a certain multi-vector anthropological connections of the population of Shestovitsa, Slavic



1330 and Norman should probably be considered the dominant components in its composition. The real  
1331 ratio is difficult to determine due to the low representativeness of the series, but there is every reason  
1332 to believe that the role of each of them was different for the male and female population, and women  
1333 evidently represented a more homogeneous group of Slavic origin.  
1334 For genetic analysis, samples of bone tissue from 12 burials excavated by D.I. Bliefeld in 1956-58  
1335 from various mounds of Shestovitsa were transferred. Unfortunately, materials from only two burials  
1336 proved to be suitable for DNA isolation:  
1337 Ukraine\_Shestovitsa-8870-97 = kurgan 32(23)/ burial 2, pit Б, male, 25-30.  
1338 Ukraine\_Shestovitsa-8871-96 = kurgan 32(23)/ burial 1, female, 35-40.  
1339  
1340 Samples used for DNA analysis  
1341 VK539 Ukraine\_Shestovitsa-8870-97  
1342 VK540 Ukraine\_Shestovitsa-8871-96  
1343  
1344  
1345  
1346  
1347

1348 **St John's College, Oxford, UK**  
1349 **Ceri Falys, Thames Valley Archaeological Services**  
1350

1351 In 2008, archaeological excavations in advance of development in the grounds of St John's College,  
1352 Oxford, UK, revealed an unexpected sequence of deposits that shed new light on Oxford's prehistoric  
1353 ritual past, a grisly episode in its history from the late Anglo-Saxon period (evidence of a massacre  
1354 dating to around AD 1000), and more mundane but still interesting development from medieval  
1355 occupation in three tenement plots, to a post-medieval farm and then the arrival of the college.

1356 Of interest to this study, the excavation led to the discovery of a mass grave containing a minimum  
1357 of 35 human skeletons. The majority of individuals were articulated and relatively complete, although  
1358 several disarticulated limbs and a skull were also recovered. The remains were not deposited within  
1359 a purposefully dug grave, but rather had been placed in a pre-existing depression in the landscape,  
1360 resulting from the incomplete infilling of a portion of a monumental Neolithic henge ditch. The  
1361 skeletons were deposited in the grave in a disorganized manner, and seemingly with little care or  
1362 respect. There was no pattern to the positioning or orientation of individuals within the grave.  
1363 Frequent intermingling of elements between individuals strongly suggest all skeletons had been  
1364 deposited in a single episode. At the deepest portions of the grave, the bodies were piled four deep.  
1365 Osteological analysis found that all individuals, with the exception of two adolescents, were tall and  
1366 robust adult males. All of them had met a violent death, as every man displayed evidence of  
1367 perimortem sharp-force trauma (blade and puncture wounds), which was extensive and excessive in  
1368 most cases. Many of the wounds were inflicted from behind, and few defensive wounds were  
1369 observed. Most unusually, several skeletal elements had been partially burned. As a whole, the  
1370 individuals in this assemblage appear to have an unusually high rate of non-fatal pathologies as well,  
1371 both congenital and acquired through their lifestyle, and minimal evidence of antemortem trauma. It  
1372 is concluded that this group, all robust adult males (bar the teenagers), mostly of the same generation,  
1373 taller than average, sharing unusual pathologies, limited antemortem trauma, and extensive  
1374 perimortem wounds, disposed of in this disorganized way, might well have been a physically distinct  
1375 sub-group of the population, and had been massacred in a single event.

1376 It is proposed that this is not a battle grave for fresh Vikings newly landed, but Danes who had been  
1377 settled in Oxford for some years, possibly some of the younger ones may even be second generation.  
1378 The unusual occurrence of charring of some skeletal elements examined in context with historical  
1379 documentation points strongly towards these men being the Danish victims of King Aethelred's  
1380 decree ordering their extermination in AD 1002, during the event known as the 'St Brice's Day

1381

1382

1383

1384 Massacre’.

1385 It was hoped that radiocarbon dating would have confirmed the possibility of these men being the  
1386 victims of the known massacre, unfortunately, these results have been inconclusive and somewhat  
1387 puzzling. The dating initially appeared to preclude associating all of the skeletons with the St Brice’s  
1388 Day massacre, with three of the radiocarbon results indicating a perfect fit with a date of AD 1002.  
1389 However, subsequent testing by a second laboratory returned three dates that appear much too early,  
1390 which is puzzling and remains unresolved. Archaeologically, however, there is no possibility that the  
1391 commingled human remains in the top of the Neolithic henge ditch could be interpreted as anything  
1392 other than a single mass grave.

1393 Isotopic results suggested the possibility that several individuals, including three of the men with the  
1394 earliest radiocarbon dates, had an unusually high seafood diet for the inland location. It has been  
1395 suggested that this marine reservoir offset is a contributing factor for the apparent discrepancy in the  
1396 dating. Other isotope results indicated the majority of men likely originated either in the British Isles  
1397 or the nearer continent, including western Denmark and Germany. One man suggests an origin in a  
1398 colder average climate than the rest of the group (e.g. Denmark or southern Scandinavia), two have  
1399 values well within the limits of the modern UK distribution, but could also be attributed to this  
1400 northern region, and a further three men have values which would appear to be from somewhere  
1401 warmer than the UK.

1402 It is highly unusual for archaeology to capture evidence of a historically documented event, and  
1403 archaeologists have usually been reluctant to make such connections, but it is here contended that,  
1404 although there are some unresolved problems, the overwhelming probability is that this site presents  
1405 just such an occasion. Of course other possibilities exist, however, the nature of the extensive  
1406 perimortem trauma (suggestive of attacks on defenseless victims rather than battle casualties),  
1407 charring of severed limbs, unusual shared congenital defects, a diet unusually high in fish proteins  
1408 for the local population, the assemblage comprised of solely tall, robust, hard-working males, with  
1409 limited previous history of violence, the jumbled nature of their burial and the location of the burial  
1410 out of town in a prehistoric (pagan) monument all strongly support the hypothesis that these men  
1411 were the Oxford victims of the St. Brice's Day Massacre<sup>71</sup>.

1412

1413 Samples used for DNA analysis  
1414 VK163 UK\_Oxford\_sk 1870  
1415 VK146 UK\_Oxford\_sk 1785  
1416 VK147 UK\_Oxford\_sk 1864  
1417 VK148 UK\_Oxford\_sk 1787  
1418 VK149 UK\_Oxford\_sk 1852  
1419 VK150 UK\_Oxford\_sk 1866  
1420 VK151 UK\_Oxford\_sk 1963  
1421 VK172 UK\_Oxford\_sk 1968  
1422 VK173 UK\_Oxford\_sk 1978  
1423 VK174 UK\_Oxford\_sk 1984  
1424 VK175 UK\_Oxford\_sk 1996  
1425 VK164 UK\_Oxford\_sk 1872  
1426 VK176 UK\_Oxford\_sk 1990  
1427 VK177 UK\_Oxford\_sk 2056  
1428 VK178 UK\_Oxford\_sk 2057  
1429 VK165 UK\_Oxford\_sk 1876  
1430 VK166 UK\_Oxford\_sk 1891  
1431 VK167 UK\_Oxford\_sk 1898  
1432 VK168 UK\_Oxford\_sk 1899  
1433 VK143 UK\_Oxford\_sk 1951  
1434 VK144 UK\_Oxford\_sk 1756  
1435 VK145 UK\_Oxford\_sk 1783  
1436  
1437  
1438  
1439  
1440  
1441  
1442

1443 **Ridgeway Hill Mass Grave, Dorset, UK**

1444 **Louise Loe, Oxford Archaeology, UK Ridgeway Hill Mass Grave, Dorset, UK**

1445

1446 The Ridgeway Hill mass grave was a multiple burial of executed Vikings, which had been made  
1447 sometime in the 10<sup>th</sup> or 11<sup>th</sup> century on the crest of Ridgeway Hill, near Weymouth, on the South  
1448 coast of England. The grave was discovered in 2009 by Oxford Archaeology during the construction  
1449 of the Weymouth Relief Road. The skeletons, around 50 in total, were predominantly young adult  
1450 males, all of whom had been decapitated: heads had been deposited in a pile located at the southern  
1451 edge of the grave, while the beheaded bodies had apparently been thrown in with little care.

1452

1453 The burial had been a one-off occurrence and had taken place at the time of, or shortly following, the  
1454 men's execution, which had probably been performed at the graveside. The grave itself was a disused  
1455 Roman quarry, used by the executioners for convenience rather than specifically dug for the purpose.  
1456 It was an irregular ovoid feature, which by the time it was used as a grave, had partially silted up, the  
1457 individuals buried to a maximum depth of less than one meter. In keeping with other Anglo-Saxon  
1458 execution cemeteries, the proximity of the grave to a major road, a parish boundary and prehistoric  
1459 monuments, would all seem to have been important. It is conceivable that the executions had been  
1460 performed in front of a large crowd of spectators and as a formal event.

1461

1462 The men had been buried in a variety of positions and occupied no particular orientation (Extended  
1463 Data Fig. 1b). Most were lying prone (face down) on a West-East alignment, but there was a lot of  
1464 variation and entanglement giving the overall impression of a jumble of bodies which had been  
1465 thrown in with little care, with no consideration to how they lay and no attempt to bury them with  
1466 their heads. This strongly suggests that they had been buried by their executioners and that, possibly,  
1467 there had been more than one executioner. Site plans and digital survey data were scrutinized to  
1468 explore the order in which the men had been buried, but no pattern could be discerned suggesting  
1469 they may have been thrown into the grave from all sides.

1470

1471 It would seem that the men had been stripped prior to their execution, because no dress fastenings or  
1472 other remains of evidence for clothing were found. There was also no evidence to suggest that the  
1473 men's hands had been tied, or that any other form of restraint had been used. The probable Icelandic  
1474 Jomsvikings saga describes the execution by beheading of a number of warriors who did not have  
1475 their hands tied, but were roped together. Perhaps this had been the same here.

1476

1477 Analysis was unable to determine exactly how many men were executed and buried in the grave,  
1478 because of some commingling and loss of bones as a result of modern disturbance. By employing  
1479 counting and pair-matching exercises, it was estimated that between 47 and 52 individuals were  
1480 present. There were more beheaded skeletons than skulls and this could mean that some heads had  
1481 been taken as trophies following the executions (Extended Data Fig. 1b).

1482

1483 All of the men had suffered horrific ends, their executions an ugly affair involving excessive violence.  
1484 The decapitations, probably performed with a sword, were evidenced by wounds that were  
1485 concentrated in the region of the neck indicating that, in most cases, it had taken several attempts,  
1486 from a variety of angles, to remove their heads. Blows intended to decapitate had been delivered from  
1487 as high up as the back of the head to as low down as the shoulder blades, suggesting they had not  
1488 been very well performed or organized. Approximately 188 wounds were observed on all of the  
1489 skeletons, that is an average number of almost four wounds per individual. In addition, sharp force  
1490 lesions were present on the forearms and tops of skulls of some individuals and may have been  
1491 defense injuries and incapacitating injuries.

1492

1493 Isotope analysis performed on a number of skeletons<sup>72</sup>, suggests they were a disparate group of people  
1494 in terms of their origins, migratory histories and dietary habits, although a general emphasis on Arctic  
1495 and sub-Arctic areas of Scandinavia, northern Iceland, the Baltic States, Belarus and Russia, and on  
1496 terrestrial food sources, are suggested. It would appear that the majority were not living in the British  
1497 Isles in the years leading to their deaths.

1498

1499 Although most of the men were young adults (18-25 years old) when they died the youngest was in  
1500 their early or mid-teens and the oldest, over 50. They possessed features, particularly those relating  
1501 to height and facial appearance, that were similar to Scandinavian populations of similar date. At least  
1502 one individual had filed his teeth, seen as horizontal grooves on his front, central, upper incisors,  
1503 possibly as a status symbol or a marker of occupation. In addition, evidence for infection and physical  
1504 impairment was frequent for a group of predominantly young individuals who had died in their prime  
1505 of life, although none of the skeletons showed convincing evidence for previous war wounds<sup>73</sup>.

1506

1507 There are no historical records that directly link the mass grave with an event, but there are a number

1508 of possibilities, such as the ravaging of Portland in 982, or Viking attacks in Dorset in 998, 1015 and  
1509 1016. Although it seems very likely that these were Vikings executed by the English, the possibility  
1510 that they were a group of mercenaries fighting for the English and executed by Vikings cannot be  
1511 entirely ruled out. Other possible scenarios are that the men were merchants or recent settlers in  
1512 England who were sentenced to judicial execution by the English authorities, were victims of the St  
1513 Brice's Day massacre (1002) or were hostages or combatants engaging in reprisals against previous  
1514 enemies during the reign of Cnut (1016-35).

1515 In total, 10 skulls were sampled for DNA analysis for the present project. The skull with the filed  
1516 teeth – 3736 – is among them.

1517

1518 Samples used for DNA analysis

1519 VK256 UK\_Dorset-3722

1520 VK257 UK\_Dorset-3723

1521 VK258 UK\_Dorset-3733

1522 VK259 UK\_Dorset-3734

1523 VK260 UK\_Dorset-3735

1524 VK261 UK\_Dorset-3736

1525 VK262 UK\_Dorset-3739

1526 VK263 UK\_Dorset-3742

1527 VK264 UK\_Dorset-3744

1528 VK449 UK\_Dorset-3746

1529

### 1530 **Acknowledgements**

1531 We thank Richard Breward and Jon Murden from the Dorset County Museum for allowing access to  
1532 the assemblage for DNA sampling.

1533

1534

1535 **Västergötlands museum IM16-107025, Varnhem RAÄ 60, Västergötland,**  
1536 **Sweden**

1537 **Maria Vretemark, Västergötlands museum**  
1538

1539 Varnhem in the central part of Västergötland is well known for its large church with the adjacent  
1540 ruins of a Cistercian abbey. Less attention has been paid to the history of Varnhem before the abbey  
1541 was founded in the middle of the twelfth century. In order to learn more about this earlier period, the  
1542 Museum of Västergötland started an archaeological research project in 2005 named '*Varnhem –*  
1543 *innan munkarna kom*' (Varnhem – Before the monks arrived). The archaeological excavations  
1544 revealed a large settlement area and a Viking Age church with a surrounding churchyard. Thick  
1545 cultural layers, foundations of buildings, a church ruin, and hundreds of Christian Viking Age graves  
1546 were discovered. All of this presents an image of a prominent farmstead with roots going far back  
1547 into the Iron Age.

1548 Varnhem is situated in an area with a great density of prehistoric sites. Graves and settlements dating  
1549 from all periods are found here. Fertile soil, rich pasture and meadowland for harvesting and grazing,  
1550 together with woodlands and lakes provided the right conditions for the emergence of a strong  
1551 wealthy community. Among the rich archaeological finds discovered in the area, the large silver  
1552 treasure found in 1873 deserves particular mention. This Viking Age hoard consists of 476 silver  
1553 coins from the early 11<sup>th</sup> century. Most of the coins are Anglo-Saxon and they point to contact with  
1554 the West. Rune stones in the region bear witness of men killed in England. Several rune inscriptions  
1555 also mention '*thegnar*' - a title of a follower of the Danish kings Sven Forkbeard and Cnut the Great,  
1556 and as such a member of the English/Danish royal forces in England after the conquest in 1015 and  
1557 the subsequent Danish occupation. Some of these *thegnar* obviously came from Västergötland, a  
1558 region that had long been part of the Danish sphere of influence. The most successful Viking soldiers  
1559 might have received a share of the taxes known as the *Danegeld*, which was paid in silver coins. They  
1560 returned home after their service ended, and this could explain how the large number of Anglo Saxon  
1561 silver coins ended up in Varnhem.

1562 The presence of a large Iron Age farmstead was confirmed through the discovery of the remains of  
1563 house constructions, hearths, trenches, pits and postholes, along with pottery, animal bones and other  
1564 artefacts. A series of radiocarbon dates indicated that the site had been continuously settled for a  
1565 thousand years, from the Roman Iron Age to Early Medieval times. This was most likely an  
1566 aristocratic manor. A church, built at the expense of the landowner, was included as one of the  
1567 buildings on the prominent farm.



1568 In past decades, remains of early churches and early Christian burial grounds have emerged in several  
1569 places in central parts of Västergötland. The oldest churches in this region have been dated to the  
1570 period around the year 1000. They were privately built farm churches, predating the centralised  
1571 church organisation of the twelfth century with its system of parish churches based on a territorial  
1572 division of the landscape. The foundations of this private church were excavated as part of the  
1573 archaeological project at Varnhem (Extended Data Fig. 1d). The first church in Varnhem was built  
1574 in the late 10<sup>th</sup> century. It was a small wooden church. Sometime during the period 1030-1050 AD  
1575 the wooden church was replaced by a larger church built of locally quarried limestone. This church  
1576 was probably one of the first stone buildings in Sweden.

1577 Surrounding the foundations of the church in Varnhem, there is an extensive, nearly 4000 m<sup>2</sup>  
1578 Christian burial place containing at least 2000 graves, and perhaps as many as 3000. Approximately  
1579 350 graves have been excavated so far and a well-preserved assemblage of human bones has been  
1580 recovered for osteological analysis. The rest of the graves remain untouched under the grass of the  
1581 park. The graves at Varnhem exhibit signs of a socially stratified society. Members of the family that  
1582 owned the magnate's farm were buried closest to the church. This is indicated by the presence of  
1583 limestone coffins. Further away from the church, the dead had been interred in wooden coffins or in  
1584 simpler graves without a coffin. The social division of the churchyard is also reflected in the state of  
1585 health that can be observed in the skeletons. There was also a division by gender. Men were buried  
1586 to the south of the church and women to the north. The dating of the graves is extremely interesting.  
1587 The burial ground at Varnhem was used continuously for Christian burials from the first half of the  
1588 tenth century to the end of the twelfth century, a period of 250-300 years. Christianity was obviously  
1589 established in the area already by the middle of the tenth century at the latest<sup>74</sup>.

1590

1591

1592 Samples used for DNA analysis

1593 VK29 Sweden\_Skara 17

1594 VK30 Sweden\_Skara 105

1595 VK31 Sweden\_Skara 194

1596 VK33 Sweden\_Skara 175

1597 VK34 Sweden\_Skara 135

1598 VK35 Sweden\_Skara 118

1599 VK39 Sweden\_Skara 181

|      |                        |
|------|------------------------|
| 1600 | VK40 Sweden_Skara 106  |
| 1601 | VK42 Sweden_Skara 62   |
| 1602 | VK303 Sweden_Skara 27  |
| 1603 | VK304 Sweden_Skara 36  |
| 1604 | VK306 Sweden_Skara 33  |
| 1605 | VK308 Sweden_Skara 101 |
| 1606 | VK309 Sweden_Skara 53  |
| 1607 | VK395 Sweden_Skara 275 |
| 1608 | VK396 Sweden_Skara 166 |
| 1609 | VK397 Sweden_Skara 237 |
| 1610 | VK398 Sweden_Skara 231 |
| 1611 | VK399 Sweden_Skara 276 |
| 1612 | VK400 Sweden_Skara 236 |
| 1613 | VK401 Sweden_Skara 229 |
| 1614 | VK402 Sweden_Skara 38  |
| 1615 | VK403 Sweden_Skara 217 |
| 1616 | VK404 Sweden_Skara 277 |
| 1617 | VK405 Sweden_Skara 83  |
| 1618 | VK406 Sweden_Skara 203 |
| 1619 | VK407 Sweden_Skara 274 |
| 1620 | VK424 Sweden_Skara 273 |
| 1621 | VK425 Sweden_Skara 44  |
| 1622 | VK426 Sweden_Skara 216 |
| 1623 | VK427 Sweden_Skara 209 |
| 1624 |                        |
| 1625 |                        |
| 1626 |                        |
| 1627 |                        |
| 1628 |                        |
| 1629 |                        |
| 1630 |                        |
| 1631 |                        |

1632 **Skämsta, Sweden**

1633 **Caroline Ahlström Arcini, National Historical Museums, Lund**

1634

1635 Two Dwarfs: Upplandsmuseet, inventory number - UM36031\_621 and UM36031\_623b

1636 In the year 1994 parts of a burial site were investigated in the small hamlet Skämsta north of Uppsala  
1637 in Sweden. Six inhumation graves containing skeletons from seven individuals were excavated. In  
1638 addition to the more intact graves, a pit of mixed bones was found in the northern part of the cemetery.  
1639 These bones came from a damaged grave. The excavated graves were not visible above ground. Four  
1640 of the graves however were constructed of stone slabs of various size. Five of the individuals were  
1641 orientated west-east and one was buried east-west. All of them were buried lying on their backs. They  
1642 were all single graves but in one grave bones from a newborn was found.

1643 Different types of artefacts were found in the graves such as combs, pearls, a ring for the hair.  
1644 Regarding the ring there is one parallel found in Poland. The graves have, based on the finds, been  
1645 dated to the later part of the Viking age and beginning of the medieval period (AD 1000-1100).  
1646 Estimation of age and sex has been done according to standards<sup>75</sup> and the results indicate that five of  
1647 the buried were adults, one was sub-adult 12-14 years of age and there was also a newborn. As for  
1648 the adults, two died when they were 20-40 years of age and four between 40-60 years. Regarding the  
1649 sex of the individuals three of them were men, three were women and the sub-adult was a boy.

1650 Already during the excavation, the archaeologists noticed that there was something unusual with one  
1651 of the graves (grave 41850, a.k.a. UM36031\_623b). It contained a fully grown individual, however  
1652 the stature was very small, about 130 cm. The osteological analysis of the skeletal material revealed  
1653 that the individual was a dwarf. Further investigation of the rest of the skeletons showed that this was  
1654 not the only dwarf. The individual in grave 33124 (UM36031\_621), buried just north of the dwarf in  
1655 grave 41850 was also abnormally short. A closer examination of the bones of these two individuals  
1656 showed that except for short deformed limbs and joints their vertebrae were very flat resulting in a  
1657 short trunk<sup>76</sup>. To determine the underlying cause to why the individuals were so short and why their  
1658 limbs were so deformed, a radiologist was consulted at the X-ray department in Lund. X-rays were  
1659 taken of several parts of the skeletons and the diagnose was that they have suffered from a disease  
1660 called *Spondyloepiphyseal dysplasia (SED)*<sup>77</sup>. Except for the short stature and deformed limbs, the  
1661 individuals affected by SED could have a flat face, occasionally a cleft palate and/or club foot.  
1662 Approximately 50 per cent have myopia and/or retinal detachment.

1663 *Spondyloepiphyseal dysplasia* congenita is usually inherited as an autosomal dominant condition. It  
1664 could either arise due to a mutation or appear in a child of an affected parent. If one parent is affected,

1665 the risk of inheritance is 50 percent and if both parents are affected the risk is 75 percent.  
1666 There are three possible family relationships for the dwarfs at Skämsta. They are either brother and  
1667 sister, mother and son or father and daughter.  
1668  
1669 Samples used for DNA analysis  
1670 VK517 Sweden\_Uppsala\_UM36031\_623b  
1671 VK527 Sweden\_Uppsala\_UM36031\_621  
1672  
1673

1674 **Ljungbacka (Bronsdolken 7, Lockarp parish, Malmö, Sweden)**  
 1675 **Ingrid Gustin, Dept. of Archaeology and Ancient History, Lund university,**  
 1676 **Sweden**  
 1677 **Malmö Museum**  
 1678

1679 The burial ground of Ljungbacka is situated in south-west Scania, a few kilometres east of the coast.  
 1680 In the 1970s and 80s parts of a major cemetery were excavated close to a Bronze Age burial mound.  
 1681 The total number of excavated burials reached 191; 31 were inhumations and 160 cremations. The  
 1682 cremations were dated to Late Iron Age, while the inhumations were dated to the Late Iron Age, most  
 1683 likely Viking Age. Six of the inhumation burials contained two or more individuals. The upper-lying  
 1684 individuals were often placed in opposite direction versus the underlying<sup>78</sup>.  
 1685

|                  |                                                                                                                                  |                                                                                                                                                                   |
|------------------|----------------------------------------------------------------------------------------------------------------------------------|-------------------------------------------------------------------------------------------------------------------------------------------------------------------|
| New grave number | MHM 6031: 26A                                                                                                                    | MHM 6031: 28                                                                                                                                                      |
| Old grave number | 4A                                                                                                                               | 0.250694444                                                                                                                                                       |
| Date             | Viking Age                                                                                                                       | Late Iron Age, probably Viking Age                                                                                                                                |
| Grave type       | inhumation                                                                                                                       | inhumation                                                                                                                                                        |
| Position         | southwest-northeast                                                                                                              | northeast-southwest                                                                                                                                               |
| Age              | 55-75*                                                                                                                           | 35-40                                                                                                                                                             |
| Sex              | female*                                                                                                                          | male                                                                                                                                                              |
| Stature (cm)     | 167                                                                                                                              | 170                                                                                                                                                               |
| Artefacts        | keys, knife, whetstone                                                                                                           | knife, whetstone, pottery                                                                                                                                         |
| General comments | Individual placed in prone position, head facing south. Found above a coffin with a supine individual in east- west orientation. | The lower of two burials. This individual had supine position with head facing north. The filling of the grave contained unburned skeletal remains of a young man |

1686  
 1687 Samples used for DNA analysis  
 1688 VK108 Grav4A\_ MHM 6031: 26A  
 1689 VK217 Grave6\_ MHM 6031: 28  
 1690  
 1691

1692 **Öland, Sweden**  
1693 **Helene Wilhelmson, Sydsvensk arkeologi AB, Kristianstad, Sweden /**  
1694 **Archaeology, Dept of archaeology and ancient history, Lund University, Sweden**  
1695

1696 **Öland in the Late Iron Age (AD400-1050)**

1697 In the island of Öland in the Baltic Sea, many human remains from the Late Iron Age have been  
1698 excavated from burials and other contexts. Throughout the period the burials are both cremations as  
1699 well as inhumations. There are considerable variations in inhumation burial form (pit coffin, stone  
1700 cist etc) during the Viking age<sup>79-83</sup>. The uncremated human remains from burials (and other contexts)  
1701 were recently studied using an interdisciplinary bioarchaeological perspective<sup>83</sup> integrating new  
1702 radiocarbon dates of many graves. The individuals studied for aDNA here are the majority of the late  
1703 Iron age population discussed in that study.

1704 The most recent dietary isotope analysis of human remains, show a great individual variation in diet<sup>5</sup>  
1705 supporting the archaeozoological finds and point towards a population with highly varied subsistence  
1706 strategies. First generation migration to Öland was investigated through <sup>87</sup>Sr/<sup>86</sup>Sr and  $\delta^{18}\text{O}$  isotopes  
1707 and the results were interpreted to show extensive immigration to the island with 68% non-local  
1708 individuals in the Late Iron Age. The immigrants appear to be both regional and interregional. The  
1709 greater variation in individual diet could not be concluded to correlate to provenance of an individual.  
1710 The society and people living in Öland has therefore been interpreted as population of mixed  
1711 provenance resulting in a creolized society with a mixing of different non-local and local traditions  
1712 for burial and subsistence practice<sup>83</sup>.

1713

1714 **The Viking Age burials sampled for this study**

1715 These 29 individuals were included in the study of Wilhelmson<sup>83</sup> and consist of all types of burials.  
1716 They are from 20 sites in Öland, excavated on separate occasions between the years 1931-1975.  
1717 About half of the individuals (15) are dated by <sup>14</sup>C and the rest are dated by typology. The burials are  
1718 inhumations of varied type. They have different orientation (EW, NS or SN), include different  
1719 architecture (lime stone cists, pits, coffins, full boat burial) and single as well as multiple burials in  
1720 one grave. Two more burials in this study (id 1099, 1052) are from the Early Iron Age. A table  
1721 overview below presents the selected individuals details.

1722

1723

1724

1725 Samples used for DNA analysis

| Sample | Id         | Parish            | SHM<br>(grave<br>field) | Grave id                  | 14C calib.                            | Year of<br>excavation | local/non-<br>local? (from<br>provenance<br>isotopes) | Age of death                 | Sex     |
|--------|------------|-------------------|-------------------------|---------------------------|---------------------------------------|-----------------------|-------------------------------------------------------|------------------------------|---------|
| VK332  | Oland_1088 | Smedby            | 23267                   | 3                         | 858 ±68 AD                            | 1944                  | local                                                 | 45-60                        | Male    |
| VK333  | Oland_1028 | Vickleby          | 22486                   |                           | 885 ± 69 AD                           | 1939                  | non local                                             | Mature                       | Male    |
| VK334  | Oland_1058 | Gärdslösa         | 28364                   | 134                       | 1049 ± 58 AD                          | 1964-66               | gray                                                  | Mature                       | Female  |
| VK335  | Oland_1068 | Långlöt           | 29352                   | 18                        |                                       | 1968                  | non local                                             | Young-mature                 | Male    |
| VK336  | Oland_1075 | Gärdslösa         | 28364                   | 164                       | 853 ± 67 AD                           | 1965                  | local                                                 | Mature                       | Male    |
| VK337  | Oland_1064 | Hulterstad        | 22394                   |                           | 858 ± 68 AD                           | 1939                  | local                                                 | Mature                       | Male    |
| VK342  | Oland_1016 | Hulterstad        | 25096                   |                           |                                       | 1954                  | non local                                             | 70+                          | female? |
| VK343  | Oland_1021 | Sandby            | 26454                   | 3                         |                                       | 1959                  | local                                                 | Young/mature                 | female? |
| VK 344 | Oland_1030 | Södra<br>Möckleby | 25657                   |                           |                                       | 1956                  | non local                                             | Mature-old                   | Male?   |
| VK345  | Oland_1045 | Långlöt           | 29352                   | 24                        |                                       | 1968-1969             | non local                                             | 60+                          | Male    |
| VK346  | Oland_1057 | Långlöt           | 29352                   | 13                        |                                       | 1968                  | local                                                 | Old                          | Male    |
| VK347  | Oland_1065 | Köpinge           | 6393/75                 | 3                         |                                       | 1975                  | non local                                             | Mature-old                   | Female? |
| VK348  | Oland_1067 | Köpinge           | 6393/75                 | 20                        |                                       | 1975                  | non local                                             | Old                          | Male    |
| VK349  | Oland_1073 | Kastlösa          | 27771                   | 1                         | 829 ± 57 AD                           | 1960                  | non local                                             | 55-65                        | Male    |
| VK350  | Oland_1086 | Långlöt           | 29352                   | 25                        | 799 ± 68 AD<br>(1210+-45 uncal<br>BP) | 1968-73               | non local                                             | Ca 38                        | Female  |
| VK352  | Oland_1012 | Runsten           | 28549                   |                           |                                       | 1966                  | non local                                             | 35-45                        | Male    |
| VK353  | Oland_1024 | Smedby            | 25129                   |                           | 1049 ± 58 AD                          | 1954                  | non local                                             | 16                           | Female  |
| VK354  | Oland_1026 | Hulterstad        | 19726                   | 1                         | 986 ± 38 AD                           | 1931                  | gray                                                  | 60                           | Male    |
| VK355  | Oland_1046 | Ventlinge         | 22291                   | -                         | 847 ± 65 AD                           | 1939                  | local                                                 | Ca 20                        | Male    |
| VK357  | Oland_1097 | Kastlösa          | 22763                   | -                         | 1053 ± 60 AD                          | 1941                  | non local                                             | mature                       | Female? |
| VK358  | Oland_1105 | Gärdslösa         | 28364                   | 108:I:169                 | 853 ± 71 AD                           | 1965                  | non local                                             | Young                        | Male?   |
| VK359  | Oland_1130 | Böda              | 22231                   | A7                        | 700-800 AD                            | 1937                  | NA                                                    | Over 15                      | Undet.  |
| VK379  | Oland_1077 | Böda              | 22231                   | A8                        | 700-800 AD                            | 1937                  | non local                                             | juvenile-<br>young<br>12-15y | Undet.  |
| VK380  | Oland_1078 | Böda              | 21367                   | A5                        |                                       | 1935                  | gray                                                  |                              | Undet.  |
| VK382  | Oland_1132 | Böda              | 22231                   | A7                        | 700-800 AD                            | 1937                  | NA                                                    | Over 15                      | Undet.  |
| VK442  | Oland_1008 | Smedby            | 24542                   | I undre<br>(=lower)<br>24 | 847 ±-65 AD                           | 1951                  | non local                                             | 38 ± 10                      | Female  |
| VK443  | Oland_1101 | Böda              | 21367                   |                           |                                       | 1935                  | non local                                             | Ca 23                        | Male    |
| VK444  | Oland_1059 | Smedby            | 23494                   | 20                        | 847 ± 65 AD                           | 1945                  | gray                                                  | 19                           | Male    |
| VK522  | Oland 1052 | Stenåsa           | 24846                   | 1                         | 386 ± 80 AD                           | 1953                  | local                                                 | 19                           | Male    |
| VK533  | Oland 1076 | Gärdslösa         | 28364                   | 136                       | Viking age                            | 1965                  | non local                                             | 50-60                        | Female  |
| VK579  | Oland 1099 | Mörbylånga        | 1785/67                 | 5                         | AD 200-400                            | 1966-67               | local                                                 | 18-19                        | Female  |

1726

1727

1728

1729 **Kärda, Småland, Sweden**  
1730 **Jörgen Gustafsson, Jönköpings Läns Museum**  
1731

1732 Near the village of Nästa in Kärda parish, around 10 kilometers west of Värnamo in central Småland,  
1733 several graves from the Late Iron Age have been investigated on a number of occasions. In the  
1734 surrounding area, there are other grave fields with a total of 100 mounds and 40 circular stone settings.  
1735 There are also graves (mounds and large stone settings) from the Bronze Age and Early Iron Age in  
1736 the area, but not at all to the same extent. The local ancient monument environment including the  
1737 grave fields has been described from around the year 1800 and onwards. In addition to these reports,  
1738 sections of the grave field Kärda 42b were partially investigated in connection with the building and  
1739 widening of Road 27 on three occasions: 1936–1937, 1990 and 2015.

1740 Most ancient monuments in the parish date back to the Late Iron Age<sup>84</sup>. The parish, just as the region  
1741 as a whole, is characterized by a large number of mounds and burial mound fields. Within the parish,  
1742 there are 21 known grave fields comprising a total of 471 mounds and 158 circular stone settings.

1743 When Road 27 was built between Värnamo and Smålandsstenar in November 1936, human bones  
1744 were found, which led to an archaeological investigation of the site. During the excavations, 13 graves  
1745 were found, of which nine held skeletons. Four were cremation graves, of which three were found in  
1746 a mound with a central cairn dating back to the Early Bronze Age. The age of the primary grave was  
1747 determined by the find of a dagger-shaped fire-striking flint-stone. The grave field was located on a  
1748 marked elevation along the old road. The southern part of the grave field was investigated and  
1749 removed in 1936–1937. At the excavations in 1990, when the road was widened, the remaining parts  
1750 of the grave field were removed on the southern and south-western slope of the elevation, and a  
1751 further nine graves containing skeletons were discovered. In 2015, in connection with the laying of a  
1752 water supply pipe on the south-westernmost part of the grave field, a further grave with skeletal  
1753 remains were found and investigated.

1754 The graves consisted of slightly rounded mounds with shallow ditches around them and inner stone  
1755 packing covering the buried skeletons. In some cases, it was found that the dead were buried in  
1756 coffins. All individuals were adults, with the exception of a boy of 7 to 11 years old. The graves  
1757 contained few artifacts, including knives, a sandstone whetstone, a gold foil bead and a bronze buckle  
1758 from the 11th century. Only three <sup>14</sup>C-datings have been made, of which one showed Middle Viking  
1759 Age and two Late Viking Age, around the year 1000. It was possible to determine that the graves  
1760 containing skeletons were oriented in an east-west direction and constructed according to Christian  
1761 tradition. It is quite likely that they are from the era of overlap between pagan and Christian traditions.



1762 In Smålandsstenar, only some 30 kilometers from Kärda, investigated tumuli of approximately the  
1763 same age were found to be cremation graves of the pagan tradition, which indicates that there were  
1764 local differences when it came to the transition to Christian burial practices<sup>85</sup>.

1765 The samples are taken from the graves that were investigated in 1990.

1766

1767 Samples used for DNA analysis

1768 VK265 Sweden\_Kärda 17

1769 VK266 Sweden\_Kärda 19

1770 VK267 Sweden\_Kärda 21

1771 VK268 Sweden\_Kärda 22

1772 VK269 Sweden\_Kärda 24

1773 VK270 Sweden\_Kärda 25

1774

1775

1776 **The Swedish History Museum in Stockholm SHM 16098/Gotland's Museum**  
1777 **Inv.nr. GFC12675, Kopparsvik, Gotland, Sweden**  
1778 **Sabine Sten, Department of Archaeology and Ancient History Campus Gotland, Uppsala**  
1779 **University, Sweden**  
1780

1781 **Kopparsvik**

1782 A large number of graves dated to the Viking Age, 800-1150 AD, have been located at the coast of  
1783 the Swedish island of Gotland which has always held an important geographic central position as an  
1784 island in the Baltic Sea. Archaeological finds show artefacts that are not locally manufactured on the  
1785 island, from as early as the Stone Age, 7000-1800 AD, when the island was visited by foreign peoples  
1786 who brought their own merchandise. The Viking Age was a very intense historical period for Gotland.  
1787 Archaeological finds such as jewelry and coins, mainly manufactured by silver, but also gold, show  
1788 traces of trade and exchange contacts with countries mainly from the east, south, and west. Valuable  
1789 shiploads also contributed to commotion. Perhaps visiting merchants who never returned home may  
1790 have been buried on the island, and Gotlandic merchants may never have returned home from their  
1791 travels.

1792 One of the larger grave fields along the coast, just south of the Visby harbour, is Kopparsvik, Visby  
1793 76:1, (The Swedish History Museum in Stockholm SHM 16098, and Gotland's Museum Invnr.  
1794 GFC12675). An area that due to several forms of exploitations has been excavated a number of times  
1795 under Oscar Vilhelm Wennersten, during the years 1917 and 1918, Greta Arwidsson in 1956, Erik  
1796 Nylén in 1963 and Hilka Pettersson during the period of 1964-1966. The grave field, that has been  
1797 fully excavated, is estimated to have been approximately 120 x 60m and divided into two areas, a  
1798 northern and a southern region (Fig. S1.6). Skeletal remains and archaeological artefacts have been  
1799 collected from 330 excavated and examined graves. It has, based on the approximately 1000  
1800 archaeological artefacts, been possible to date the grave field to 900-1050 AD. The archaeological  
1801 artefacts illustrate both Gotlandic manufacturing and traces of long distance trade. Several papers of  
1802 the archaeological studies e.g. by Pettersson<sup>86</sup>, Westholm<sup>87</sup> and Toplak<sup>88</sup> as well as osteological  
1803 examinations by Arcini<sup>89,90</sup> have been written about Kopparsvik.

1804 Out of the approximately 330 graves excavated at the Kopparsvik grave field in the 1900's, 174 have  
1805 been handpicked for an osteological analysis between the years 2013 to 2015, in the research project  
1806 *Vikingatida Fröjel and Kopparsvik- hälsa, gravläggning och härkomst* (Andersson 2015 unpubl.) at  
1807 Uppsala University Campus Gotland.

1808 No archaeological trace of settlements has been found in the vicinity of Kopparsvik, and the

1809 environment does not allow for farming. Kopparsvik has, therefore, been interpreted as a place of  
1810 commerce. In correlation to a research project concerning health in archaeological skeletal materials  
1811 isotopic investigations were performed on fifteen handpicked individuals from Kopparsvik, at the  
1812 Archaeological Research Laboratory, Stockholm University. The measuring of coal and nitrogen  
1813 isotopes allowed us an insight of how the diet of the Kopparsvik population may have looked. Were  
1814 they fishermen who lived mainly on a marine diet, such as fish and seal, or were they farmers who  
1815 consumed terrestrial diet, such as cattle, sheep, pigs, or terrestrial wildlife. The isotopic analysis  
1816 results showed an exclusively terrestrial diet (oral report from Professor Kerstin Lidén, Stockholm  
1817 University).

1818 Before the DNA examination was performed, detailed dental documentation and dental x-ray was  
1819 performed. The dental examinations were performed at the Osteological laboratory, department of  
1820 Archaeology and Ancient History, Uppsala University Campus Gotland in cooperation with the  
1821 Department of Cardiology, Institute of Odontology, Sahlgrenska Academy at University of  
1822 Gothenburg. The dental x-ray examinations were performed at the dental practice  
1823 *Tandläkarpraktiken*, Adelsgatan in Visby.

1824 The skeletal remains are generally very well preserved, which contributes to the good documentation  
1825 conditions for sex- and age assessments, stature estimations, and notes of pathological changes  
1826 (Andersson 2015 unpubl.).  
1827

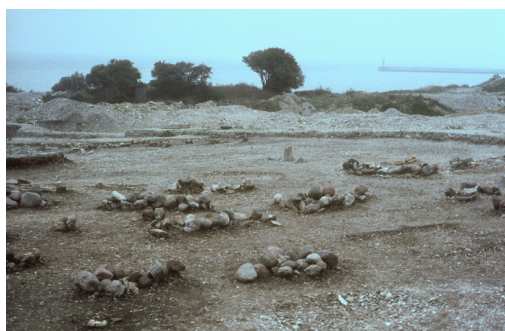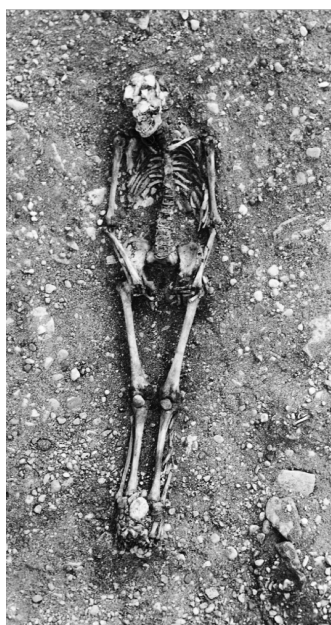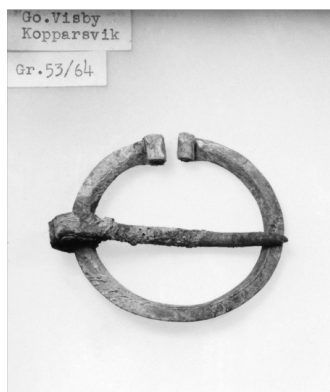

1828  
 1829 **Fig. S1.6:** An overview of the site Kopparsvik (top); skeletal remains (lower left) and a Viking age  
 1830 artefact (lower right) excavated in grave 53 in the burial site Kopparsvik.

- 1831
- 1832 Samples used for DNA analysis
- 1833 VK48 Gotland\_Kopparsvik-212/65
- 1834 VK50 Gotland\_Kopparsvik-53.64
- 1835 VK51 Gotland\_Kopparsvik-88/64
- 1836 VK53 Gotland\_Kopparsvik-161/65
- 1837 VK232 Gotland\_Kopparsvik-240.65
- 1838 VK251 Gotland\_Kopparsvik-30.64
- 1839 VK450 Gotland\_Kopparsvik-35
- 1840 VK452 Gotland\_Kopparsvik-111
- 1841 VK453 Gotland\_Kopparsvik-134
- 1842 VK454 Gotland\_Kopparsvik-140

1843 VK467 Gotland\_Kopparsvik-181  
1844 VK468 Gotland\_Kopparsvik-235  
1845 VK469 Gotland\_Kopparsvik-260  
1846 VK471 Gotland\_Kopparsvik-63  
1847 VK472 Gotland\_Kopparsvik-112  
1848 VK473 Gotland\_Kopparsvik-126  
1849 VK474 Gotland\_Kopparsvik-137  
1850 VK475 Gotland\_Kopparsvik-187  
1851 VK476 Gotland\_Kopparsvik-225  
1852 VK477 Gotland\_Kopparsvik-228  
1853 VK478 Gotland\_Kopparsvik-271  
1854 VK479 Gotland\_Kopparsvik-272

1855

1856 **Fröjel**

1857 Gotland's position in the Baltic Sea, with mile long coasts (800 km) and the vicinity water has been  
1858 of great importance to the people on the island for centuries, both regarding fishing, seal-and bird  
1859 hunting and marine commerce. A large number of fishing hamlets and larger harbors has been located  
1860 along the coasts. Fröjel, Bottarve/Nymans, placed on the western coast of the island of Gotland, was  
1861 one of the largest and most important harbors and commerce sites during the Viking Age and the  
1862 early Middle Ages. Other important contemporary places of commerce, in the Baltic Sea area, was  
1863 Birka in Uppland, Sweden, Hedeby in northern Germany, Wolin in northern Poland, and Grobin in  
1864 south west Lithuania.

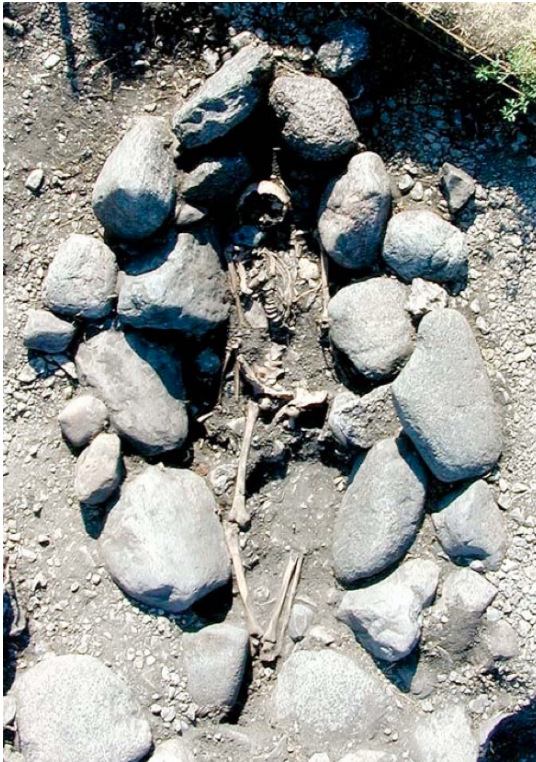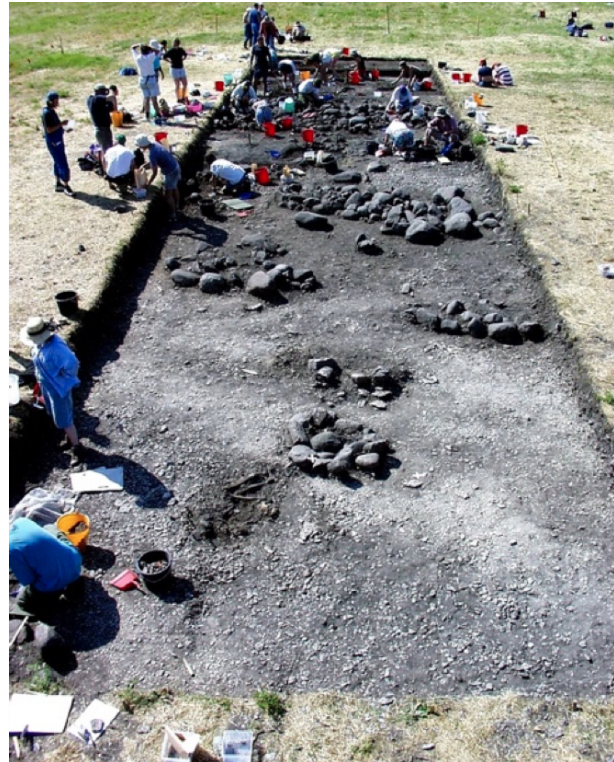

**Fig. S1.7:** Grave 8 (left) and the overview (right) of the Fröjel site it was excavated in. © Dan Carlsson

The excavations of the Fröjel site was initiated in the late 1980's and proceeded for many years under the management of associate professor Dan Carlsson, Centre for Baltic Sea studies, University of Gotland. The excavations revealed the remains of both a harbor and a place of commerce, with remnants of house structures from the 500's to the 1180's (Fig. S1.7). The archaeological finds included weight scales, balances, and silver coins, mainly Arabic and German, that indicated long distance trade. Other finds included raw materials and semi-manufactured objects of metal, bone, and antler, and imply the presence of handicrafts (combs and needles). Vast finds of animal bones indicate animal husbandry in the area, and finds of fish net sinkers indicate that the population were fishing in the area. A Viking Age grave field was also excavated in the area, and contained finds of jewelry and fine details of garments. It is also evident that a church was built at the site in the early 1000's<sup>91,92</sup>. The archaeological finds and the archaeological skeletal remains are stored at the County Museum Gotland.

Samples used for DNA analysis

VK56 Gotland\_Frojel-001A98

1884 VK57 Gotland\_Frojel-03601  
1885 VK58 Gotland\_Frojel-03604  
1886 VK60 Gotland\_Frojel-00702  
1887 VK63 Gotland\_Frojel-01499  
1888 VK64 Gotland\_Frojel-03504  
1889 VK428 Gotland\_Frojel-00287  
1890 VK429 Gotland\_Frojel-01599  
1891 VK430 Gotland\_Frojel-00502  
1892 VK431 Gotland\_Frojel-00487A  
1893 VK432 Gotland\_Frojel-00303  
1894 VK433 Gotland\_Frojel-01798  
1895 VK434 Gotland\_Frojel-01288  
1896 VK435 Gotland\_Frojel-02500  
1897 VK437 Gotland\_Frojel-02303  
1898 VK438 Gotland\_Frojel-04498  
1899 VK439 Gotland\_Frojel-02498  
1900 VK440 Gotland\_Frojel-003A88  
1901 VK441 Gotland\_Frojel-032A98  
1902 VK455 Gotland\_Frojel-03401  
1903 VK456 Gotland\_Frojel-02404  
1904 VK457 Gotland\_Frojel-03299\_1  
1905 VK458 Gotland\_Frojel-03299\_3  
1906 VK459 Gotland\_Frojel-02198  
1907 VK460 Gotland\_Frojel-04898  
1908 VK461 Gotland\_Frojel-025A89  
1909 VK462 Gotland\_Frojel-025B89  
1910 VK463 Gotland\_Frojel-019A89  
1911 VK464 Gotland\_Frojel-019B89

1912

### 1913 **Acknowledgements**

1914 Thanks to Gotlands Museum for lending the Kopparsvik and Fröjel material.

1915 Dentist Carolina Bertilsson, Gothenurg and Professor Peter Lingström, Department of Cardiology,

1916 the Institute of Odontology, the Sahlgrenska Academy at University of Gothenburg. Dentist Björn  
1917 Lundberg, Tandläkarpraktiken, Adelsgatan, Visby and Johanna Andersson, Gothenburg. Professor  
1918 Kerstin Lidén, Department of Archaeology and Classical Studies, Stockholm University.  
1919  
1920  
1921



1922 **Vikings in Medieval Russia**

1923 **Natalia Grigoreva (Institute for the history of material culture, Russian**  
1924 **Academy of Sciences, Saint-Petersburg, Russia) and Vyacheslav Moiseyev (Peter**  
1925 **the Great Museum of Anthropology and Ethnography (Kunstkamera), Russian**  
1926 **Academy of Sciences)**

1927

1928 Scandinavian artifacts are frequently found in the settlements and burials between 9 and 11 centuries  
1929 CE on the Northern territories occupied by early Russian state known as Old Rus'. These finds and  
1930 historical literal sources namely the earliest Russian chronicle of Tale of Past Years according to  
1931 which Vikings (Varyagi in Russian tradition) took part in the foundation of the Rus' state in 862 put  
1932 forward a question about the role of Scandinavians in history and population processes in early  
1933 Russia.

1934 Regrettably pre-Christian burial tradition in Baltic area including Scandinavia was based on  
1935 cremation which limits the wide use of skeletal remains in morphologic and genetic population  
1936 studies. Most anthropological series referable to the problem are dated by period after the  
1937 Christianization of the Rus' at the end of 10<sup>th</sup> century.

1938 Among the sites series which can be closely related to Vikings are those from Shestovitsy, Chernigov  
1939 region, Ukraine, Gnezdovo, Smolensk region, Russia, Staraya Ladoga (Leningrad region, Russia)  
1940 and some others.

1941

1942 **Staraya Ladoga (before 1701 - Ladoga)**

1943 Coordinates 59.999102, 32.295809

1944

1945 According to dendrochronological data Ladoga (in the saga «Aldeigja» or «Aldeigjuborg») was  
1946 founded in 753. The place became the first residence of military leader Rurik possibly of  
1947 Scandinavian origin in 862 before his moving to Novgorod and who found first Russian royal dynasty  
1948 of Rurikovich. In 11-13<sup>th</sup> centuries Staraya Ladoga functioned as trade outpost of the Novgorod  
1949 Republic on the way from the Baltic Sea to Novgorod and then to Constantinople or to Caspian Sea.

1950

1951 It is generally believed that Medieval Ladoga being an important trade and handicraft center had  
1952 complex population structure which included groups of different origin from all Baltic regions. The  
1953 strongest Scandinavian influence in Staraya Ladoga is detected for the period from the middle of 9th

1954 to the middle of the 10th century. Apart of a large number of Scandinavian imports presence of two  
 1955 large log buildings with galleries in Ladoga settlement was reported. It was suggested that these  
 1956 buildings served as inns and trade-storages of Scandinavian merchants<sup>93</sup>.  
 1957 Unfortunately, early Scandinavian burials of 9-10 centuries found at Plakun site situated on the other  
 1958 bank of the Volkhov River opposite to Ladoga settlement consist of only cremations.  
 1959 The only early medieval skeletal collection available for morphologic and genetic studies was  
 1960 excavated in 1938-1939 by V.I. Ravdonikas and G.P. Grozdilov on so called Zeml'yanoie Gorodische  
 1961 (Earth hillfort) of Staraya Ladoga. All burials in the cemetery were made in graves without mounds  
 1962 according to Christian tradition. Skeletons lay on their backs with their heads to the West. According  
 1963 to stratigraphy Ravdonikas suggested two periods of functioning of the cemetery namely 17-18 and  
 1964 11-12 centuries. Several burials from the lower horizon was dated by <sup>14</sup>C as 880-1188. According to  
 1965 the analysis for strontium, the buried have differences from the local fauna. According to written  
 1966 sources in first half 11 century Ladoga area was given by Grand Prince of Rus' Yaroslav Mudry  
 1967 (Yaroslav the Wise) to his wife Swedish Princess Ingegerd Olofsdotter as a marriage gift, who in turn  
 1968 set her relative Earl Ragnvald Ulfsson as governor of the land. Scandinavian Kongesagaer (kings'  
 1969 sagas) testifies presence of Viking Christians in the military troops of Ragnvald Ulfsson for defense  
 1970 from local pagan tribes.  
 1971  
 1972 Collection of skeletons from earlier graves of Staraya Ladoga housed in the Peter the Great Museum  
 1973 of Anthropology and Ethnography (Kunstkamera) consists of 65 individuals. Craniometrical studies  
 1974 reveal that skulls of individuals from the southern part of the cemetery morphologically are closely  
 1975 related to series of Viking Age from Scandinavia<sup>94</sup> while those of Northern part possibly belong to  
 1976 admixed Slavic, Finnish and Scandinavian population. Later this finding was supported by results of  
 1977 integrative analysis of cranial metric and nonmetric traits<sup>95</sup>.  
 1978  
 1979 Samples used for DNA analysis  
 1980 VK14 Russia\_Ladoga\_5680-12  
 1981 VK15 Russia\_Ladoga\_5680-16  
 1982 VK16 Russia\_Ladoga\_5680-2  
 1983 VK17 Russia\_Ladoga\_5680-17  
 1984 VK18 Russia\_Ladoga\_5680-3  
 1985 VK19 Russia\_Ladoga\_5757-1

1986 VK20 Russia\_Ladoga\_5680-1  
1987 VK21 Russia\_Ladoga\_5680-18  
1988 VK22 Russia\_Ladoga\_5680-13  
1989 VK23 Russia\_Ladoga\_5680-9  
1990 VK218 Russia\_Ladoga\_5680-4  
1991 VK219 Russia\_Ladoga\_5680-10  
1992 VK220 Russia\_Ladoga\_5680-11  
1993 VK221 Russia\_Ladoga\_5757-14  
1994 VK408 Russia\_Ladoga\_5757-18  
1995 VK409 Russia\_Ladoga\_5680-14  
1996 VK410 Russia\_Ladoga\_5680-15

1997

1998 **Kurevanikha 2**

1999 Coordinates: 58.783533, 36.162257

2000

2001 The Kurevanikha 2 medieval cemetery is located on Mologa River near Kurevanikha village,  
2002 Ust'uzhna district, Vologda region. The cemetery was excavated by A.N. Bashenkin in 1990. The  
2003 age of the burial place was estimated as 11-13 centuries. It was suggested that first Scandinavians  
2004 appeared at the place in 8<sup>th</sup> century due to its important role on the way from Ladoga region to Volga  
2005 trade way to Caspian province. Again, although this suggestion is supported by Scandinavian artifacts  
2006 found in graves it cannot be proved by morphologic or genetic researches because of wide spread  
2007 cremation tradition of before Christian period. Nevertheless, cranial metric studies reveal that  
2008 Christian time series of skulls from Kurevanikha 2 has close biological affinities with Scandinavian  
2009 series of the Viking Age<sup>94</sup>.

2010

2011 Samples used for DNA analysis

2012 VK160 Russia\_Kurevanikka\_7283-3

2013 VK161 Russia\_Kurevanikka\_7283-4

2014

2015 **Pskov**

2016 Together with Gnezdovo and Staraya Ladoga Medieval Pskov was area with clear evidence of  
2017 Scandinavian presence. The main part of Pskov Necropolis medieval time situated on the territory of

2018 Okol'ny Gorod (Outskirts City) is occupied by kurgan burial grounds. While most of burials are very  
2019 poor of artifacts few of them have rather rich kit of the Scandinavian things. Most of burials consist  
2020 of cremations but also several burials with inhumations were found.

2021 In 2003-2009 eight chamber burials with inhumations of 10-11 centuries were found near  
2022 Starovoznesenskiy monastery (Ancient Pskov necropolis of 10<sup>th</sup> - beginning of 11<sup>th</sup> century).  
2023 Originally these burials were covered by artificial mounds which were later destroyed during  
2024 subsequent city construction. Nevertheless, these graves survived and were found during rescue  
2025 archeological excavations. The group of burial chambers were also found in Kiev, Timerevo,  
2026 Gnezdovo, Staraya Ladoga and some other. Basically, chambers are bigger than ordinary ground burial  
2027 pits with their size up to 3.4 X 3.2 m. Their walls, ceiling and floor were made of logs. Basically,  
2028 these burials were accompanied by numerous artifacts of Northern European and of Scandinavian  
2029 origin.

2030 It was suggested that chambers burial tradition in early Russia are of Scandinavian origin. The socio-  
2031 cultural group which practiced this rite in Eastern Europe became part of the higher stratum of the  
2032 Old-Russian population. With the adoption of Christianity that tradition subsided<sup>96</sup>.

2033

2034 Samples used for DNA analysis

2035 VK158 Russia\_Pskov\_7283-18

2036 VK159 Russia\_Pskov\_7283-20

2037

2038

2039

2040 **Gnezdovo, Russia**

2041 **Tamara Pushkina and Alexandra Buzhilova, Moscow State University**

2042

2043 The Gnezdovo complex of archeological monuments (main period of its existence covers the early  
2044 10<sup>th</sup> - the early 11<sup>th</sup> centuries) is situated about 13 km westward of present-day Smolensk. The  
2045 complex occupies a vast territory on both banks of the Dnieper river and consists of two settlements  
2046 and seven groups of burial mounds that surrounds settlements<sup>97</sup>. The complex includes 13 coin and  
2047 coin-and-items hoards of the 10<sup>th</sup> century. The hoards were found mainly in the territory of the Central  
2048 settlement, the principal and the most explored settlement<sup>98</sup>.

2049 At the present time Gnezdovo settlement that belongs to the 10<sup>th</sup>-early 11<sup>th</sup> century is designated as  
2050 the only early town center in the Smolensk part of the Dnieper basin and the biggest monuments of  
2051 the Old Russian state emergence in the territory of Eastern Europe. Many characteristics obtained in  
2052 the course of archeological study results analysis brings Gnezdovo together with town centers that  
2053 existed in Northern Europe in the late first-early second millennia AD, such as Birka, Hedeby etc.

2054 The monument's scope and its role in many respects were determined by Gnezdovo's geographical  
2055 position at the junction of Eastern Europe's river systems that connect the Baltic with the Black Sea  
2056 and the Caspian Sea.

2057 Choice of the place for settlement made by Slavs and Scandinavians who came there practically  
2058 simultaneously was determined by the landscape situation and favorable climatic conditions at the  
2059 turn of the first and the second millennia: at that relatively dry-weather period the Dnieper flood plain  
2060 was not drowned during high waters and was suitable for reclamation. Initially the settlement territory  
2061 was inconsiderable and amounted to no more than 1-2 ha but as early as the first stage of the  
2062 settlement existence the Central settlement, i.e. the fortified part of the settlement was formed. A  
2063 small part of burials (about 1% of the collection) belongs to the initial stage of the settlement  
2064 existence. This number of burials completely corresponds to the monument's initially modest scope.  
2065 Heyday of Gnezdovo fell on the second half of the 10<sup>th</sup> century: the settlement area increased and  
2066 attained its maximum (about 30 ha) due to expansion of building-up within the flood plain limits and  
2067 development of new considerable area along the right bank of the Dnieper above the flood plain and  
2068 of inward lands.

2069 The absolute majority of approximately 1000 of burial mounds explored in all 5 groups of mounds  
2070 was built at the middle and the second part of the 10<sup>th</sup> century. Rare burial mounds with cremations  
2071 (such mounds were built near the eastern, north-western, and western boundaries of the settlement)  
2072 are related to the earliest period of the settlement's existence. Some mounds of the Forest mounds

group and partially the Central mound group belong to such burials. The well-known mound L-13 is one of these mounds. L-13 mound gave the earliest for Gnezdovo find of Byzantine amphora with the Slavic inscription-graffito. In the middle and the second half of the 10<sup>th</sup> century the other mound groups (the Dnieper, the Ol'shanskaya and the Right-Bank Ol'shanskaya groups) were formed. These late mounds are situated along the Dnieper bank downstream. At the same time the Forest and the Central mound groups continued to grow.

Single and paired burials performed in accordance with cremation rite under low mounds and so called big mounds with rather complicated cremation rite as well as single inhumations in graves and chambers under mounds belong to the late period of the settlement existence. Male burials in chambers accompanied with riding horses belong to the same period. By the end of the late period the total number of burial mounds attained 4500-5000. Cremation is predominant burial rite in Gnezdovo mounds (cremations comprise 52% of burials), inhumations compose about one third (31%) of burials in the collection of the explored burials. The rest 17% are so called empty mounds where remnants of burials have not been detected.

As judged by materials obtained in the mound necropolis, population of Gnezdovo attained approximately 800-1100 persons and this population distinguished itself by a stable demographic structure and obvious social differentiation.

Exploration of the settlement territory has demonstrated its variegated structure and availability of different zones: residential and manufacturing zones as well as areas related with Gnezdovo functioning as a river port. Traces of manufacturing activities represented by findings of tools, rejected products, intermediate products and raw material stocks have been noted on all explored plots, from the earliest period of the settlement existence and onwards.

At the heyday of the settlement no less than 5 manufacturing zones functioned in Gnezdovo. Findings related to processing of iron, nonferrous and precious metals are concentrated in these zones. Workshops produced adornments for Scandinavian and Slavic women, bridle and belt plates made in the Volga Bulgarian tradition and items specific for the local culture of long mounds. Topography of Oriental coin silver findings and Scandinavian antiquities witnesses their concentration in Gnezdovo and its immediate vicinity.

About 450 Oriental, Byzantine, and West European coins (the greater part of these coins is fragmented) have been found in burials and occupation layer. Dates of coin minting vary from the 6<sup>th</sup> to the mid-11<sup>th</sup> centuries. 13 Gnezdovo hoardings contain over 1400 Oriental silver coins (intact and fragmented, with punches and riveted eyelets), two Byzantine nomismae, weigh—scales and

2105     plummets as well as various adornments. Adornments include 190 gold and silver items. There are  
2106     items of Slavic, Scandinavian, and Oriental origin among these adornments.

2107

2108     If judged by concentration of Oriental silver Gnezdovo is comparable with such North European  
2109     monument as Birka and Old Russian monuments: Kiev, Rurikovo gorodishche (i.e. a place of  
2110     abandoned old fortified settlement), Novgorod (the earliest layers). So called Byzantine imported  
2111     goods (glazed pottery, precious textiles etc.) comprise a considerable part of findings. Abundance of  
2112     Scandinavian items (adornments, items of everyday use, amulets etc.) is one of the most expressive  
2113     features of the Gnezdovo material culture. These findings are matched with data of burial rite analysis  
2114     of which permits saying that no less than 25% of burials are Scandinavian ones.

2115     Data of sporo-pollen, carpological, and osteological analysis bear witness that cultivated plants and  
2116     pastoral farming played an important role in the settlement economy and in some extent provided for  
2117     vital requirements of the settlement inhabitants. Inconsiderable area of arable land discovered in the  
2118     western part of Gnezdovo complex beneath mounds of the Dnieper group and character of that time  
2119     landscape bespeak of inability of the early town population to provide themselves with agricultural  
2120     produce and had to get a considerable part of such products from without.

2121     The latest burials of Gnezdovo necropolis are few and can be dated by the turn of the 10<sup>th</sup> and the  
2122     11<sup>th</sup> centuries. Archeological material indicate that a rather active life continued in Gnezdovo in the  
2123     early 11<sup>th</sup> century, but Gnezdovo gradually lost its unique character of the urban center and became  
2124     a feudal estate. The final stage connected with the town extinction and transfer of its functions to  
2125     Smolensk described in chronicles. This fate brings Gnezdovo together with certain early town centers  
2126     of North Europe. It is believed that these centers ceased to exist due to a complex of reasons. These  
2127     reasons include a piecemeal termination of Islamic coins importation in the 70s of the 10<sup>th</sup> century,  
2128     change of trade routes and a conflict between local elite and the central power of the emerging state<sup>98</sup>.

2129

2130     Samples used for DNA analysis

2131     VK222 Russia\_Gnezdovo 60-95

2132     VK223 Russia\_Gnezdovo 75-140

2133     VK224 Russia\_Gnezdovo 78-249

2134     VK252 Russia\_Gnezdovo 78-258

2135     VK253 Russia\_Gnezdovo 78-262

2136     VK254 Russia\_Gnezdovo 81-287

- 2137 VK255 Russia\_Gnezdovo 81-292
- 2138 VK272 Russia\_Gnezdovo 77-241(g)
- 2139 VK273 Russia\_Gnezdovo 77-255
- 2140 VK413 Russia\_Gnezdovo 81-290
- 2141 VK466 Russia\_Gnezdovo 77-222
- 2142 VK470 Russia\_Gnezdovo 77-212
- 2143
- 2144
- 2145
- 2146
- 2147
- 2148
- 2149
- 2150
- 2151
- 2152



2153 **Sandomierz, Poland**  
2154 **Monika Bajka, "Trzy Epoki" Archaeological Service and Marek Florek,**  
2155 **Institute of Archaeology, Maria Curie-Sklodowska University in Lublin, Poland**  
2156

2157 The inhumation cemetery is situated on the left bank of the Vistula, in the northern part of the Town  
2158 Hill of Sandomierz, geo coordinates: N: 50°40'53,56''; E: 21°44'57,08''. The Town Hill occupies  
2159 the edge of the Sandomierz Upland loess area, which towers circa 50 metres above the level of the  
2160 Vistula. In the Medieval Age (since the end of the 10<sup>th</sup> century), Sandomierz was the main centre of  
2161 the Sandomierz Region, and constituted the second centre (after Cracow) of the historical Lesser  
2162 Poland. In the 12<sup>th</sup> century, Sandomierz, together with Cracow and Wroclaw, was called *sedes regni*  
2163 *principalis*.

2164 As recent hypotheses indicate, Sandomierz was established after the annexation of the northern part  
2165 of the Lesser Poland (Sandomierz Region) to the State of the Piasts (the family ruling the tribe of  
2166 Polanie from the Greater Poland) in around the year 970. The new incomers from the Greater Poland  
2167 (the centre of the Piast state) had the greatest influence on the creation of the town.

2168 The cemetery encompasses the central and the northern part of the Town Hill. Because the site is in  
2169 majority a built-up area, the site is known mainly from casual findings. In the years 2013-2015, in  
2170 the northern part of the Town Hill, 9 graves were found. They represent the oldest part of the  
2171 cemetery. Because of their shape (large, rectangular grave pits with walls covered with boards and  
2172 wooden vaults, and with wooden coffins inside) some of them are associated with the "chamber  
2173 graves" from Scandinavia, north-eastern Europe, northern and central Poland (Pomerania, Kuyavia,  
2174 Greater Poland). The chamber of grave No. 9 was additionally surrounded with a circular palisade.  
2175 Some of the graves (including all the graves of chamber-like construction) were equipped with the  
2176 following items: clay vessels, an iron axe, dress elements (horseshoe-shaped bronze buckles), silver  
2177 and bronze decorations (silver rings, temple rings), sets for making fire (flint strike-a-lights, iron  
2178 firesteels, knives etc)<sup>99-101</sup>.

2179  
2180 Chronology: Basing on the equipment (pottery, metal findings), the graves discovered in the years  
2181 2013-2015 should be dated to the time between the end of the 10th century and the middle of the 11th  
2182 century. Radiocarbon dating of bones from the grave No. 8 was performed: 1070+/-35 BP, after  
2183 calibration: 938-1022 cal AD, and from the grave No. 9: 1090+/-35 BP, after calibration: 888-1018  
2184 cal AD. This date seems to be the same like the one based on archaeological dating of the artifacts.  
2185

2186 Elements indicating the foreign origin of some persons buried in the graves that were excavated in  
2187 the years 2013-2015:

- 2188 - the form of some graves: it resembles the form of the chamber graves; it generally does  
2189 not occur in the Sandomierz Region and in the Lesser Poland
- 2190 - the vessels found in the graves have no analogies in the local pottery from the 10<sup>th</sup> and  
2191 11th centuries, their forms refer to the pottery from the Greater Poland and central Poland
- 2192 - horseshoe-shaped bronze buckles (from graves Nos. 7 and 9) which represent a garment  
2193 element characteristic mainly of the region of the Baltic coast and north-eastern Europe  
2194 (Rus)
- 2195 - an axe from grave No. 7, which has the closest analogy to the finds from the cemeteries  
2196 of the Varangian and Rus' cemeteries from Eastern Europe
- 2197 - a key from grave No. 9, which was secondarily used as a firesteel; it has the closest  
2198 analogy to the finds from Scandinavian and east European (Russian) sites.
- 2199 - the results of the analysis of strontium content in the teeth of the persons buried in the  
2200 cemetery

2201

2202 The furnishing of the graves is of high standard in comparison to other graves from the same period  
2203 from Sandomierz and its neighborhood. The form of the graves and their furnishing indicate that they  
2204 were created for the local elites of foreign origin, who had arrived here from other territories, probably  
2205 from the Greater Poland, after the annexation of the Sandomierz Region to the State of Polanie (the  
2206 State of the Piasts). The equipment elements (horseshoe-shaped bronze buckles, axe, key used as  
2207 firesteels) and the form of the graves might indicate that the Varangians and Rus' people were also  
2208 buried in the cemetery. They were at the service of the Piasts, e. g. as the members of the princely  
2209 squads or as merchants.

2210

2211 Samples used for DNA analysis

2212 VK494 Poland\_Sandomierz 1/13

2213

2214

2215

2216 **Cedynia, Poland**

2217 **Dariusz Blaszczyk, Institute of Archaeology, University of Warsaw**

2218

2219 Cedynia site 2 (Cedynia commune, Gryfino county, zachodniopomorskie voivodeship) is located on  
2220 the Odra river (on the right bank) in Western Pomerania region. The cemetery was situated at the  
2221 culmination and slope of a hill, ca. 200 m to the north-east of the fortified settlement (gród). In the  
2222 cemetery 1308 inhumation and 9 cremation graves was unearthed. The cemetery was partially  
2223 excavated. It was used from the end of the 11<sup>th</sup> c. and/or beginning of the 12<sup>th</sup> c. to the middle of the  
2224 14<sup>th</sup> c. Grave 558 was different from others graves in the cemetery with its grave equipment, large  
2225 burial pit and traces of wooden funeral construction (a chamber?).

2226

2227 **Grave 558**

2228 An elite grave – burial in a wooden chamber, male, *adultus*, oriented east-west<sup>102,103</sup>. The individual  
2229 was facing east (a typical Christian orientation of that time) and buried in a supine position, on the  
2230 back, arms along the body, legs strait. The deceased was buried in a wooden coffin which was placed  
2231 in a chamber made of timber 2.8 (length) × 2.3 (width) × 1.2 (depth) m. The chamber was very poorly  
2232 preserved, only traces of wood were visible. It was possibly built in a framework construction.

2233 Burial equipment: Iron double edged sword (type  $\alpha$  according to A. Nadolski<sup>104</sup>) at the left pelvic  
2234 bone was discovered. The sword had a straight cross-guard, a relatively short handle and a lens-  
2235 shaped pommel. Its total length was about 97 cm. On the blade under the cross-guard, the x-ray  
2236 examination revealed a sign in a form of an outline of a face. This type of swords was used in the end  
2237 of 11<sup>th</sup> c. and in the beginning of the 12<sup>th</sup> c. In addition, there were unearthed an iron knife at the left  
2238 pelvic bone and a U-shaped belt fitting made of bronze plaque on lumbar vertebrae.

2239 Chronology: Archaeological dating based on a typology of the sword: the end of the 11<sup>th</sup> c. or the  
2240 first half of the 12<sup>th</sup> c. <sup>14</sup>C date 1010±30 BP (Poz-75117, 973-1150 AD, 95.4%, a piece of a bone).  
2241 The date is affected by the preservative covering the whole skeleton (Analyses carried out in Poznań  
2242 Radiocarbon Laboratory, Poland).

2243 Additional information: The skeleton was covered with rodent bones; they are probably the results of  
2244 postdepositional processes. Over the burial stones were registered. However, probably they were not  
2245 connected with the grave no. 558 but were possibly associated with the building of the nearby  
2246 church<sup>103</sup>. In the cemetery one more burial with sword was found, male, grave no. 1120.

2247 Diet: A sample from a rib produced the following isotope results:  $\delta^{13}\text{C}$ : -19,3, ‰C: 40,0,  $\delta^{15}\text{N}$ : 10,0,  
2248 ‰N: 14,5, C:N: 3,2. It indicates that the diet of the studies individual was based on C<sub>3</sub> plants (cereals,

2249 vegetables and fruit) with some amount of animal products (meat, dairy and eggs). He could also  
2250 have in his diet a small share of freshwater fish. This type of diet was typical for the region and time  
2251 period (Analyses carried out in Stable Isotope Facility, University of Bradford, UK).

2252 Provenance: A sample from a second premolar P2 produced the following isotope result:  $^{87}\text{Sr}/^{86}\text{Sr}$ :  
2253 0,7110. This isotopic signature falls within the range of  $^{87}\text{Sr}/^{86}\text{Sr}$  values occurring in the postglacial  
2254 lowland areas of the southern shore of the Baltic Sea (0,7100-0,7124). It is very likely that the  
2255 individual was of local origin - from Cedynia itself or from the West Pomerania region (Analyses  
2256 carried out in Geochronology and Isotope Geochemistry Laboratory University of North Carolina,  
2257 Chapel Hill, USA).

2258

#### 2259 **Grave 435**

2260 An ordinary grave – burial in a wooden coffin with no grave goods<sup>105,106</sup>. A male, *maturus*, oriented  
2261 east-west, facing east (a typical Christian orientation of that time) and buried in a supine position, on  
2262 the back, arms along the body, legs straight. This sample was taken for DNA analysis for comparative  
2263 purposes.

2264 Chronology: Middle Ages, 11<sup>th</sup> – 13<sup>th</sup> centuries

2265 Diet: A sample from a rib produced the following isotope results:  $\delta^{13}\text{C}$ : -20,3, %C: 52,1,  $\delta^{15}\text{N}$ : 11,6,  
2266 %N: 19,2, C:N: 3,2 (Analyses carried out in Stable Isotope Facility, University of Bradford, UK).

2267

2268 Samples used for DNA analysis

2269 VK211 Poland\_Cedynia gr. 435

2270 VK212 Poland\_Cedynia gr. 558

2271

2272

2273 **Czersk, Poland**

2274 **Dariusz Blaszczyk, Institute of Archaeology, University of Warsaw**

2275

2276 Czersk site 1 is situated on the Vistula river (on the left bank) in Masovia region (Góra Kalwaria  
2277 commune, Piaseczno county, Masovia voivodeship). In Middle Ages Czersk was an important center  
2278 of political and ecclesiastical power. A burial ground was located around a church. The cemetery was  
2279 partially excavated yielding 797 burials. It was used from the end of the 11<sup>th</sup> century or beginning of  
2280 the 12<sup>th</sup> century to the 13<sup>th</sup> century<sup>107</sup>.

2281

2282 **Grave 609**

2283 An elite grave – male, *senilis* (about 60 years), oriented east-west, facing east (a typical Christian  
2284 orientation of that time). The height of the individual was about 180 cm (according to M. Trotter and  
2285 G. Gleser). Visible traces of degenerative changes (connected with the age) and wounds (broken and  
2286 fused ribs) were observed on the skeleton. The deceased was buried in a wooden coffin with iron  
2287 ferrules. He was buried in a supine position, on the back, right hand straight along the body, left arm  
2288 bent in elbow and supported by hand on the pelvis, legs straight.

2289 Burial equipment: Iron double edged sword (type  $\alpha$  according to A. Nadolski<sup>104</sup>) at the left pelvic  
2290 bone was unearthed. In addition, the following items were discovered: 2 bronze bowls (type VI  
2291 according to T. Poklewski<sup>108</sup>), an iron spearhead bone (type V according to A. Nadolski<sup>104</sup>), a wooden  
2292 bucket covered with decorated iron sheet, a golden ring, a thin, silver, spirally wound wire (alloy of  
2293 silver with copper and gold).

2294 Chronology: Archaeological dating based on a typology of the sword, the spearhead and bronze  
2295 bowls: the end of the 11<sup>th</sup> c. or the first half of the 12<sup>th</sup> c. (most probably the beginning of the 12<sup>th</sup> c.).  
2296 <sup>14</sup>C date 1085±30 BP (Poz-68711, 894-1016 AD, 95.4%, a piece of a bone). The date is affected by  
2297 the reservoir effect as a result of significant consumption of marine fish (proofed by N and C stable  
2298 isotope analysis). After correction of <sup>14</sup>C it can be calibrated to 1050-1200 AD, 68% and dated  
2299 probably to the turn of the 11<sup>th</sup> - 12<sup>th</sup> c (Analyses carried out in Poznań Radiocarbon Laboratory,  
2300 Poland).

2301 Additional information: The grave was situated near the church, according to some scholars grave  
2302 609 is interpreted as a burial of Magnus Haroldson, one of 3 sons of Harold II Godwinson, the last  
2303 Anglosaxon king of England<sup>109,110</sup>.

2304 Diet: A sample from a rib produced the following isotope results:  $\delta^{13}\text{C}$ : -17,2, ‰C: 43,6,  $\delta^{15}\text{N}$ : 12,3,  
2305 ‰N: 15,9, C:N: 3,2. It indicates that an important part of the diet of this individual was sea fish or

2306 anadromous fish (migrating, e.g. sturgeon). This type of diet was unusual for the region and time  
2307 period and is very different from any known studied Polish populations (Analyses carried out in  
2308 Stable Isotope Facility, University of Bradford, UK).

2309 Provenance: Samples from a first molar M1 and a piece of rib produced the following isotope results:  
2310  $^{87}\text{Sr}/^{86}\text{Sr}$ : 0,7106 and 0,7114. Obtained results are ambiguous and not allow to determine whether the  
2311 examined person was of local origin or was a newcomer. The  $^{87}\text{Sr}/^{86}\text{Sr}$  value obtained for the first  
2312 molar (complete mineralization to about 4.5 years of age) is found in both areas with post-glacial  
2313 deposits as well as areas with marine carbonate rocks or clastic rocks such as loess. Such values occur  
2314 in northern Poland and other parts of Europe (e.g. southern Scandinavia) but are rather not present in  
2315 the territory of England. The difference in strontium values between the first molar (forming in early  
2316 childhood) and a rib (reflecting the last two to four years of life) may indicate that the individual spent  
2317 his adulthood (including the last years of his life) in a different place than his childhood. This would  
2318 indicate that the man buried in the grave 609 changed his place of residence during his lifetime  
2319 (Analyses carried out in Geochronology and Isotope Geochemistry Laboratory University of North  
2320 Carolina, Chapel Hill, USA).

2321

2322 Samples used for DNA analysis

2323 VK200 Poland\_Czersk gr. 609

2324

2325

## 2326 **Kraków-Zakrzówek, Poland**

2327 **Dariusz Błaszczuk, Institute of Archaeology, University of Warsaw**

2328

2329 The cemetery was situated on the right bank of the Wisła river on the sandy dune in the foothills of  
2330 the Twardowski Rocks. Cemetery at Kraków-Zakrzówek was a typical early Christian, not  
2331 churchyard, inhumation, 'flat' burial ground with graves arranged in rows and oriented according to  
2332 east-west axes. 75 certain and 22 probable burials as well as 2 clusters of bones was unearthed<sup>111</sup>.

2333 The cemetery was used from the beginning of the 11<sup>th</sup> to the beginning of the 13<sup>th</sup> century. One grave  
2334 attracted special attention because of its extraordinary form. The grave no. 19 was situated in the  
2335 center of the cemetery and from three sides surrounded by a ditch with traces of 9 postholes. Possibly,  
2336 a ditch existed also on the fourth side but was destroyed by post-depositional processes. The length  
2337 of the entire structure was about 4 m, and a width about 3.2 m. These traces indicate the existence on  
2338 the surface of the grave a monumental timber structure in a form of 'a house of the dead' or a fence.

2339 Grave 19 was different from others graves in the cemetery with its central location, surrounding ditch  
2340 and grave equipment. This sample, however, wasn't sequenced due to poor DNA preservation.

2341

#### 2342 **Grave 24**

2343 A commoner's grave – A male *adultus* or *maturus* (about 40 years old) oriented east-west, facing  
2344 west and buried in a supine position, right hand along the body, left hand bent with a hand on the  
2345 pelvis, legs straight. The body height was 168 cm. No traces of a coffin were discovered.

2346 Burial equipment: Whetstone.

2347 Chronology: Middle Ages between the 11<sup>th</sup> and the beginning of the 13<sup>th</sup> c.

2348 Provenance: A sample from a second premolar P2 produced the following isotope result:  $^{87}\text{Sr}/^{86}\text{Sr}$ :  
2349 0,7095. This isotopic signature falls within the range of  $^{87}\text{Sr}/^{86}\text{Sr}$  values occurring in the areas with  
2350 marine carbonate rocks or clastic rocks such as loess. This type of rock is a geological base in Kraków  
2351 and its surroundings. It seems that the studied individual was of local origin. (Analyses carried out in  
2352 Geochronology and Isotope Geochemistry Laboratory University of North Carolina, Chapel Hill, the  
2353 USA).

2354

2355 Samples used for DNA analysis

2356 VK210 Poland\_Kraków gr. 24

2357

#### 2358 **Acknowledgements**

2359 Thanks for lending samples to the State Archeological Museum in Warsaw (Łukasz Stanaszek PhD),  
2360 the Archaeological Museum in Kraków (Michał Zaitz MA) and the Regional Muzeum in Cędynia.

2361

2362

2363 **Bodzia, Poland**

2364 **Wieslaw Bogdanowicz, Museum & Institute of Zoology PAS, Warszawa, Poland**

2365

2366 Bodzia, located in the north-central part of Poland, approximately 40 km south-east of the city of  
2367 Toruń, is one of the most fascinating archaeological discoveries dating back to the time of origin of  
2368 the Polish state. The main discovery connected to this site relates to the remains of an early medieval  
2369 cemetery found in 2007 during rescue excavations carried out by the Institute of Archeology and  
2370 Ethnology of the Polish Academy of Sciences along the route of the A1 motorway. The discovery  
2371 encompassed 50 chamber-like graves dated to the late 10<sup>th</sup> and early 11<sup>th</sup> centuries AD; along with 8  
2372 belonging to a 2<sup>nd</sup> phase (dating back to between the second half of the 11th century and the early  
2373 12<sup>th</sup> century). The unique character of this burial ground mainly lies in the fact that members of a  
2374 small elite population have been buried there. Furthermore, almost all the dead are orientated N-S, in  
2375 what is an uncommon feature for that time in Mediaeval Europe.

2376

2377 The layout of the cemetery has no analogies in Europe. It is formed of rows of graves with large  
2378 burial pits placed in quadrangular burial spaces. The burial field is divided into rectangular sepulchral  
2379 spaces, marked on the surface and arranged into 4 rows oriented along the east-west axis. Some of  
2380 these plots are adjacent, especially those in the northern row with the shape of a trapezium narrowing  
2381 down to the east. The others, located more to the south, are arranged in smaller clusters or  
2382 individually, retaining the same orientation as the rest. The burials were located compactly and  
2383 contiguously, in this way ensuring a clear delimitation of the cemetery boundaries.

2384

2385 Equally unique are the rich grave goods, which may be linked mainly with Scandinavia and Kievan  
2386 Rus, but also with Southern and Western Europe. A characteristic feature of all the burials here is the  
2387 bountiful presence of a range of items, including weapons (sword, lang sax, spearhead, Khazarian-  
2388 type pickaxe) – in the case of men, and numerous ornaments (rings, pendants, amulets, kaptorgas,  
2389 necklaces, etc.) – in the case of women. There are abundant coins: 67 items from 58 graves. These  
2390 relate to the Holy Roman Empire, England, the Premyslid State and Poland. These and many other  
2391 features make the cemetery at Bodzia a very specific example highlighting Europe's past.

2392

2393 A study based on the strontium isotope  $87\text{Sr}/86\text{Sr}^{112}$  combined with genetic analyses<sup>113</sup> show that a  
2394 part of the population buried at Bodzia was not local, but was probably of Scandinavian and/or Rus-  
2395 Varangian origin. A special role is played here by the tomb of a young warrior (E864/I) buried



2396 together with three young women; one of them was placed below him, in what is a two-level burial  
 2397 pit. In his tomb, a ceremonial sword was folded, ornamented in the Mammen style. On the strap-end  
 2398 there is a bident – the tamga of Prince Sviatopolk the Accursed (1015-1019) – son of Vladimir the  
 2399 Great and husband of a daughter of Polish king Boleslav I (the Brave).  
 2400 The cemetery extends back to the period in which the Polish State had its origins, and also relates to  
 2401 unknown episodes in that state formation, and to the emergence of elites in the early state under the  
 2402 Piasts. The aforementioned features (as well as others) ensure this discovery unique status where  
 2403 Europe's past is concerned.  
 2404 Bone remains of five individuals have been studied (see the inventory of the burials and their contents  
 2405 after Sobkowiak-Tabaka<sup>114</sup>; with dating after Buko and Kara<sup>115</sup>):  
 2406 E63 (♂) – adultus/early maturus, incomplete skeleton, pathological changes included dental caries,  
 2407 head of a Type 1 axe found near right femur; dated 978-1016 AD;  
 2408 E864/I (♂) – adultus, skeleton with several injuries made by a sharp-edged tool with lack of traces of  
 2409 healing suggesting a violent death; weapons including an iron Petersen Type Z sword (with swords  
 2410 of this type mainly dated to the first half and middle of the 11<sup>th</sup> century, i.e. the Late Viking Period<sup>116</sup>;  
 2411 dated 1010-1020 AD;  
 2412 E58 (♂) – maturus, incomplete skeleton, pathological changes including lifetime loss of teeth, with  
 2413 weapons including a battle-knife of the langsax type, and tools an iron knife placed near the left arm,  
 2414 and another iron knife placed near the right femur;  
 2415 E37 (♀) – early adultus, incomplete skeleton, with probable post-inflammatory changes visible on  
 2416 the left femur and a post-inflammation state also noted inside the right rib; iron bucket hoop near the  
 2417 feet; in a row of graves dated between 980/990-1030/1035;  
 2418 E870 (♀) – adultus (20-25 years old), incomplete skeleton, no pathological changes noted, among  
 2419 findings are a few coins and a whorl made of Volhynian slate; dated 1017-1023 AD.  
 2420  
 2421 Samples used for DNA analysis  
 2422 VK153 Poland\_Bodzia E63  
 2423 VK154 Poland\_Bodzia E37  
 2424 VK155 Poland\_Bodzia E870  
 2425 VK156 Poland\_Bodzia E58  
 2426 VK157 Poland\_Bodzia E864/I  
 2427

2428 **Orkney Islands, UK**  
2429 **Julie Gibson, Ingrid Mainland, University of the Highlands and Islands,**  
2430 **Orkney, UK**  
2431

2432 **Newark, Deerness, Orkney (HY 5746 0413)**

2433 Newark comprises a Viking Age and Medieval period chapel and cemetery located in the parish of  
2434 Deerness on the Mainland of Orkney. The site was excavated in the late 1960s and early 1970s and  
2435 although not fully published the osteological materials recovered have been subject to <sup>14</sup>C and  
2436 isotopic analysis, providing a broad chronology for the cemetery and placing the human remains  
2437 within the cultural traditions of Scandinavian Scotland<sup>117,118</sup>.

2438 The site at Newark stands in a sand-blown landscape at the side of a bay. The deposits remain to a  
2439 maximum of c1.3m thick above glacial clay and had been truncated by the imposition of a grand post-  
2440 medieval house. The cemetery has been eroding at least since the 1920's exposing over 100m of  
2441 graveyard associated with a medieval chapel.

2442 The chapel was excavated by Dr Don Brothwell between 1969 and 1972 in order to obtain a sequence  
2443 of Norse skeletons; Burials continue to be exposed from time to time in the coastal section. The recent  
2444 find of a Pictish Type 2 decorated cross slab on this site by Hugo Anderson Whymark, introduces the  
2445 possibility of the presence of an earlier 8th century chapel (see  
2446 <https://sketchfab.com/models/6de93d22334a4b6da3098402e7e720b5>).

2447  
2448 Three skeletons were selected for analysis, based on preservation and availability. Of these, only one  
2449 (VK205) has a secure date: 930+- 40, calibrated, but marine reservoir effect has been proposed by  
2450 Barrett suggesting a date in early 11th century<sup>117</sup>. This individual is a female and was buried without  
2451 grave goods.

2452  
2453 Samples used for DNA analysis  
2454 VK204 Orkney\_Newark for Brothwell  
2455 VK205 Orkney\_Newark 68/12  
2456 VK206 Orkney\_Newark 71(13)

2457  
2458 **Buckquoy, Birsay, Orkney (HY 243 282)**

2459 Buckquoy is a Late Iron Age ('Pictish') and Norse period settlement site located in the parish of  
2460 Birsay on the Mainland of Orkney. The settlement has been a key site in discussion on Scandinavian

2461 first contact<sup>119</sup>, due to the admixture of Pictish and Scandinavian type material found within Pictish-  
2462 style houses. Inhumations were associated with the structural remains, dating to both the Pre-Viking  
2463 and the Viking occupation. A full account of the archaeology is to be found in Ritchie<sup>120</sup> with  
2464 additional information on the dating of the skeletal remains in Ashmore<sup>121</sup>.  
2465 Excavations undertaken in the early 1970's at Point of Buckquoy<sup>120</sup> revealed a somewhat disturbed  
2466 inhumation inserted into the top of a multi-period settlement mound of the 8th to 10th centuries AD.  
2467 Immediately beneath were the partial remains of a succession of Norse longhouses, overlying a  
2468 Pictish multi-cellular dwelling. Identified by skeletal analysis as a male aged about 40, the burial  
2469 (VK202) consisted of a simple scoop grave with the body thought to have been interred in a crouched  
2470 position, laid on his right side and aligned S-N with his feet to the north. Grave goods consisted of a  
2471 bronze ring-pin of the early 10<sup>th</sup> century, half of a silver penny of Edmund (940-6), an iron knife, a  
2472 whetstone and an iron javelin-head. <sup>14</sup>C dates are available but earlier than the artefactual assemblage,  
2473 that accords with its stratigraphic relations. Brundle et al.<sup>122</sup> suggest the dated bone may be intrusive.  
2474 VK201 was an earlier, Pictish, unaccompanied long cist burial of an adult male dated to 404 - 596  
2475 calAD<sup>121</sup>.

2476

2477 Samples used for DNA analysis

2478 VK201 Orkney\_Buckquoy, sk M12

2479 VK202 Orkney\_Buckquoy, sk 7B

2480

#### 2481 **Brough Road, Birsay, Orkney (HY 2466 2807)**

2482 Archaeological remains from Brough Road are derived from excavation during the 1970s of a  
2483 coastally eroding midden and associated structures dating to the Late Iron Age and Norse periods. A  
2484 full account of the archaeology is to be found in Morris et al.<sup>123</sup> with additional information on the  
2485 dating and of isotopic analysis of human remains in Ashmore<sup>121</sup> and Barrett et al.<sup>124</sup>. A pre-Viking  
2486 long cist cemetery and later Viking or Norse inhumations were also recovered within this area, which  
2487 overlooks the Brough of Birsay and Birsay village, important Pictish/Viking/Norse settlements and  
2488 ecclesiastical centre.

2489

2490 Three individuals were sampled from Area A Brough Road. The primary use of the site is reflected  
2491 by cairn-burials, comprising two long cist graves underlying stone cairns. VK203 is a long cist grave  
2492 unaccompanied inhumation containing only one body. Two dates from this individual have resulted

2493 in two widely spaced <sup>14</sup>C dates, 130-54 CalAD or 548-668 CalAD, but this individual represents in  
2494 both cases a pre-Viking burial. Osteologically, this individual was probably a male and was elderly.  
2495 The cairns were sealed by sand and midden layers into which were inserted two burials dating to  
2496 Viking/Late Norse periods: VK208 - a rough cist grave cutting into the midden topping one of the  
2497 cairns containing a disarticulated body of a probable male aged over 30 years. It was associated with  
2498 artefacts iron artefacts, complete antler comb, hog-backed in form and of a Viking period date. Two  
2499 dates from this individual indicate a later Pictish to Viking date-range, 650-980 CalAD or 890-1026  
2500 CalAD. On top of one the cairns (above) lay a flexed inhumation (VK207), not contained within a  
2501 cist and with no grave finds. This was an adult, aged c. 30-35 years but sex could not be determined  
2502 osteologically. A <sup>14</sup>C date of 880 to 1160 Cal AD<sup>121</sup> was obtained for this individual.

2503

2504 Samples used for DNA analysis

2505 VK203 Orkney\_BY78, Ar. 1, sk 3

2506 VK207 Orkney\_BY78, Ar. 1, sk 1

2507 VK208 Orkney\_BY78, Ar. 1, sk 2

2508

2509

2510 **Medieval skeletons from the Public Library Site in Trondheim, Norway**  
2511 **Birgitte Skar and Lisa Mariann Strand, NTNU University Museum, Trondheim,**  
2512 **Norway**  
2513

2514 Seven skeletons originating from the Early and High medieval period in Norway, extending from  
2515 1030 to ca 1350 AD are part of the foundation of the genetic research material discussing  
2516 demographics during the Viking Ages.

2517 The medieval churchyard from which the skeletons originate was located at The Public Library Site  
2518 (Folkebibliotekstomten) in the central part of the town Trondheim. After several minor excavations  
2519 in the 19<sup>th</sup> and 20<sup>th</sup> century, the excavation of the St. Olavs churchyard located at this site was  
2520 completed during a ten-month period between 1984-85<sup>1</sup>.

2521 The individuals that are included in the present analysis were between 11 and 50 years of age,  
2522 representing both biological females and males. Each burial context shows distinct expressions of  
2523 Christian ritualistic burial customs as they were inhumations, buried in an east-west direction and  
2524 were either buried in plank coffins, trunk coffins or without coffin.

2525 The seven individuals analysed in this study belong to the St. Olavs churchyard<sup>125</sup>. This part of the  
2526 churchyard lasted for approximately 100 years. During this stage, the churchyard was extended and  
2527 an increased amount of burials were found. In addition to the clearly Christian burial customs, burial  
2528 rods and hazel sticks were present in some of the graves.

2529 Five of these have been radiocarbon dated and display surprisingly old dates. Three of them except  
2530 the sample from individual VK113 (SK223) are dated within the final Viking period, the two  
2531 mentioned individuals, however, derive from the very beginning of the Medieval period. From the  
2532 automated measure of stable carbon ( $\delta^{13}C$ ) from the dating laboratory, it can be read that the stable  
2533 carbon value is quite low. This indicates that the individuals have had a mixed diet potentially  
2534 consisting primarily of marine resources. This is an issue that needs further investigation regarding  
2535 stable carbon and nitrogen isotope values of the five dated individuals, which may again serve to  
2536 clarify the obtained dates with reference to marine reservoir effect and thus shed light on the question  
2537 of the dates being too old.

2538

2539 Samples used for DNA analysis

2540 VK113 Norway\_Trondheim\_SK223

2541 VK114 Norway\_Trondheim\_SK332

2542 VK116 Norway\_Trondheim\_SK372

2543 VK117 Norway\_Trondheim\_SK328  
2544 VK118 Norway\_Trondheim\_SK271  
2545 VK124 Norway\_Trondheim\_SK356  
2546 VK125 Norway\_Trondheim\_SK367  
2547  
2548

2549 **Italian Medieval sites**

2550 **Gabriele Scorrano (University of Copenhagen), Enrico Cappellini (University of**  
2551 **Copenhagen), Pasquale Favia (University of Foggia), Italo M. Muntoni**  
2552 **(Soprintendenza Archeologia)**  
2553

2554 **San Lorenzo in Carminiano (Foggia, Italy)**

2555 The medieval settlement of S. Lorenzo in Carminiano (then Carmignano) was the main village in  
2556 Northern Apulia between Late Middle Ages and Modern Age. It is located in the central area of the  
2557 “Tavoliere delle Puglie” plain, just outside the city of Foggia (Northern Apulia – Italy). The  
2558 settlement topography is articulated into three subdivisions, bounded by ditches, with a northern  
2559 trapezoidal one (enclosure I), probably surrounded by walls and extending over 7 hectares ca. (13<sup>th</sup> -  
2560 16<sup>th</sup> century), another in the north-western position (enclosure II), smaller in size and with a half-  
2561 circular morphology, and a third southern one (enclosure III), elliptical and very broad (up to 15 ha).  
2562 In the site only a small church dedicated to San Lorenzo has been found. Outside the church, along  
2563 the bottom wall, various paving slabs have been discovered, both in cobwebs (USR 932-841) covered  
2564 with a combustion ground, in tessellato, with stone tiles and brick sections and finally a wider lacer  
2565 with brick remains<sup>126</sup>. Some poles’ holes have also been found and they may perhaps refer to a late-  
2566 medieval stage. The trench carried out in the area in front of the church identifies at least four phases:  
2567 the first three referring to the Middle Ages, the latter probably to the 17<sup>th</sup>-18<sup>th</sup> century<sup>126</sup>.

2568 The oldest traces of a funeral attendance are represented by a simple burial in the ground (t.2), hosting  
2569 two individuals, and a third one.

2570 The next occupation was set up directly on the cemeteries, obliterating the ditches, addressing a  
2571 residential area of which two orthogonal sects have been identified so far in cobblestones tied to the  
2572 ground. The bigger enclosure is the suburbium of settlement. In this area, some silos for cereal have  
2573 been found, directly cut into the natural substrates of limestone clay and clay, without coating.

2574

2575 Samples used for DNA analysis

2576 VK534 Italy\_Foggia-869

2577 VK535 Italy\_Foggia-891

2578

2579 **Cancarro (Troia, Foggia, Italy)**

2580 The church of Cancarro is situated at 3,5 km South-West from Troia (Foggia, Italy), at 430 m asl.

2581 The city of Troia was built on the ruins of the Roman town of Aecae in a strategic position on the Via

2582 Traiana. The church was used between the 11<sup>th</sup> and the 13<sup>th</sup> century<sup>127</sup>. Next to the church  
2583 archaeologists unearthed a cemetery with 54 well-preserved burials, often overlaying each other. Two  
2584 graves host two individuals and five pits are ossuaries<sup>127</sup>. A minimum of 79 skeletons, mainly women,  
2585 were confidently identified from re-used graves<sup>127</sup>. The cemetery was used between the late 11<sup>th</sup>  
2586 century (Norman age) to the second half of the 13<sup>th</sup> century (Swabian-Angevin age), based on  
2587 artifacts<sup>127</sup>.

2588

2589 Samples used for DNA analysis

2590 VK536 Italy\_Foggia-1240

2591 VK537 Italy\_Foggia-1248

2592 VK538 Italy\_Foggia-1249

2593

2594

2595



2596 **Balladoole, Isle of Man, UK**  
2597 **Allison Fox, Manx National Heritage**  
2598

2599 The Site: Around AD 900, a Viking was buried in an oak ship at Balladoole, Arbory in the south east  
2600 of the Isle of Man. The site is a low hill, with a wide panorama over the surrounding landscape and  
2601 seascape. There is artefactual evidence for Mesolithic and Neolithic use of the area, and structural  
2602 evidence for Bronze Age burials and Iron Age occupation. It was during the excavation of the latter  
2603 hillfort that the Viking burial was discovered<sup>128</sup>.

2604 The ship had been placed in a shallow pit, which disturbed several existing Christian burials.  
2605 Boulders were placed around the hull of the ship to hold it in place, and the dead man and his goods  
2606 placed within (Extended Data Fig. 1c). The grave goods included jewelry of outstanding  
2607 workmanship, as well as simpler, practical objects, but no sword, indicating that his status was gained  
2608 through trade. A low mound of earth and boulders was then raised over the ship and capped with the  
2609 cremated remains of a horse, dog, pig, sheep or goat, ox and cat that had been sacrificed as part of  
2610 the burial rite. A marker post was set in the top of the mound.

2611 By the time the site was excavated in the 1940s, the timber of the ship had almost completely rotted  
2612 away in the soil, leaving only 300 of the iron nails that once held it together. The ship was about 10.5  
2613 m in length and was a trading vessel built for sailing short distances and landing on beaches to buy  
2614 and sell goods, ideal for trading around the Irish Sea.

2615 The Viking: From the skeletal remains, the Viking was about 45 years old when he died, c. 175 cm  
2616 tall, strong and muscular. His teeth were badly worn by chewing coarse food. During 2006/7, the  
2617 face of the Viking was reconstructed by Dr Caroline Wilkinson and Caroline Needham, University  
2618 of Dundee. Scientific analysis on his diet and origin was undertaken during the same period by a  
2619 team led by Dr Leigh Symonds. Isotope analysis suggested that the Viking was quite likely to have  
2620 come directly from Scandinavia rather than from around the site of his burial<sup>129</sup>.

2621  
2622 Samples used for DNA analysis  
2623 VK170 Isle-of-Man\_Balladoole  
2624  
2625

2626 **Viking Age sites from Ireland**  
2627 **Maeve Sikora (National Museum of Ireland) and Linzi Simpson (Trinity College**  
2628 **Dublin)**

2630 **Islandbridge, Dublin NMI 08e0693:001 (Ireland\_08e693)**

2631 This is the most recent discovery of a furnished Viking grave in Ireland. The grave, at Islandbridge  
2632 in Dublin, is located close to the find spot of many Viking graves reported in the 19th century<sup>130</sup>. The  
2633 human remains were discovered during an excavation in 2008 that took place as a response to the  
2634 discovery of an iron sword and spearhead at the same location in 2004<sup>131</sup>. The in-situ human remains  
2635 were discovered at a depth of 80-90cm below ground level but most of the skeleton had been heavily  
2636 disturbed and did not survive. The individual was lying in a supine position, and based on the position  
2637 of the in-situ vertebrae, was oriented approximately north-south with the head at the north. The legs  
2638 appear to have been flexed, as indicated by the portion of the left femur which was in situ. Portions  
2639 of the right scapula and clavicle, fragments of 7 right ribs, unsided fragments of radius and ulna, and  
2640 fragments of vertebrae remains were recovered and have been identified by Barra Ó Donnabhain as  
2641 those of a young adult male aged between 18 and 20 years at death<sup>131</sup>. Although the grave had been  
2642 heavily disturbed, a copper alloy ringed pin and two copper alloy objects which probably represent a  
2643 scale pan, were discovered associated with the remains. Copper staining on some of the rib bones  
2644 suggests that these artefacts were originally placed on the torso. It is considered probable that the  
2645 sword and spearhead found in the same area in 2004 were associated with this grave. Isotope analysis  
2646 of the human remains uncovered indicate that this individual was non-local to Dublin and spent most  
2647 of his early life in some region of Scandinavia before coming to Ireland<sup>131</sup>. The burial has not been  
2648 radiocarbon dated but based on the artefact typology dates to the first half of the ninth century.  
2649 The main body of comparable material for this grave is found in the  
2650 Islandbridge/Kilmainham/Inchicore area of Dublin. Graves from this area, the largest cemetery in the  
2651 Viking west, have produced a rich array of artefacts with an impressive collection of weapons and  
2652 trading material, among other objects. This grave was immediately north-west of the 'great gravel  
2653 pit' that produced the rich collection of grave-goods in 1866<sup>130</sup>.

2654  
2655 Samples used for DNA analysis

2656 VK546 Ireland\_08E693

2657

2658

2659 **Eyrephort, Co. Galway NMI 1947:55 (Ireland\_EP55)**

2660 This grave is one of the few graves of early Viking Age date in Ireland to be discovered outside of  
2661 Dublin. It was discovered 1947 in west Co. Galway, in sand dunes in the townland of Eyrephort,  
2662 close to the coast. It was not excavated at the time but a description of the burial was recorded based  
2663 on the account of the finder who had uncovered and subsequently re-interred the remains. A full re-  
2664 evaluation of the grave and contents has recently been published and the account here is based on this  
2665 most recent analysis<sup>130</sup>. The human remains were analysed by Barra Ó Donnabhain and represent a  
2666 young adult male, probably aged between 20 and 25 years at death and with a living stature of  
2667 c.175cm<sup>130</sup>. The burial was extended and supine with the head to the south-west and the feet to the  
2668 north-east. The grave contained an iron sword, spearhead and shield boss. Iron staining on the bones  
2669 indicates that the sword probably lay along the left side, next to the arm. Both the spearhead and  
2670 shield boss are of Scandinavian type and the sword is a double-edged sword of Petersen type K dating  
2671 to the second half of the ninth century<sup>130</sup>.

2672

2673 Samples used for DNA analysis

2674 VK543 Ireland\_EP55

2675

2676 **Finglas, Co. Dublin, NMI 04E0900 (Ireland\_FG254)**

2677 This grave was discovered during excavations in advance of construction works at Finglas, a suburb  
2678 of Dublin, some 5.5km northwest of the city<sup>132</sup>. Finglas was formerly a village outside of Dublin, and  
2679 probably developed from an early medieval monastic centre founded there. Although relatively little  
2680 is recorded about the monastery, references to a scriptorium there in the ninth century suggest that it  
2681 was considered a significant foundation<sup>133</sup>. This report is based on Kavanagh's account of the  
2682 excavation and Sikora's publication on the finds<sup>132,133</sup>. The grave was located close to the church at  
2683 Finglas, but outside of the boundary of the church grounds. It contained a single adult female who  
2684 was buried with a pair of oval brooches, a casket decorated with bone plaques and an antler comb,  
2685 only a portion of which survived. The skeleton was extended and supine, with the head to the south-  
2686 west. It had been damaged by previous groundworks and the lower legs and feet had been heavily  
2687 disturbed. The remains represented a woman aged between 25 and 35 at death. She had been buried  
2688 wearing a pair of oval brooches, one at each shoulder. The casket and comb had been placed by her  
2689 right side. Only one brooch survives intact while the second is very fragmentary. The brooches are  
2690 single-shelled cast oval brooches of the Berdal type which have been gilded and inlaid with silver

2691 wire. The complete brooch is highly decorated with zoomorphic studs some of which are cast with  
2692 the brooch and some of which were applied. These animals have eyes made of glass studs. This type  
2693 of brooch dates to the mid-ninth century, and it is likely that the burial occurred around this time<sup>133</sup>.  
2694 Finglas is not only unusual for the location of the burial and the high-status of some of the grave-  
2695 goods. In Ireland, 78 of the 107 Viking graves known are those of males<sup>130</sup>, and the discovery of a  
2696 female grave is therefore highly significant. The location of the grave, clearly a non-Christian burial,  
2697 adjacent to a Christian church is also interesting and as Harrison and Ó Floinn point out, is 'further  
2698 evidence of the complex relationship between the 'pagan' Norse and 'Christian' Irish in the mid-  
2699 ninth century'<sup>130</sup>.

2700

2701 Samples used for DNA analysis

2702 VK544 Ireland\_FG254

2703

2704 **Ship Street Great**

2705 **Licence no. 01E0722, (Ireland\_SSG12)**

2706 This Viking warrior grave was located on the western side of Ship Street Great, close to the junction  
2707 with Stephen Street Lower. The removal of a deep cellar exposed the remains of a very truncated  
2708 skeleton lying approximately 3m below the ground level, in the boulder clay. The partial skeleton  
2709 was in a supine position with the head to the west and was lying in a shallow grave-cut. All that  
2710 survived was the intact lower mandible, crushed skull fragments, vertebrae, some ribs, the shoulder  
2711 blades, the right collar bone and part of the right arm. Analysis by Laureen Buckley, Osteologist,  
2712 revealed that this was probably a male, aged between 25 and 29 who had suffered nutritional  
2713 deficiency and had the beginnings of degenerative disease of the spine suggestive of a hard and  
2714 strenuous lifestyle. Four small artefacts were found in the neck area, a small silver finger ring, a  
2715 corroded iron object, a glass bead, and small twisted silver ring. A fragment of a pattern-welded sword  
2716 was also found close to the skeleton but an examination of the surrounding boulder clay found no  
2717 other features. A fragment of bone was sent for dating and this produced a 95% probability of the  
2718 individual dating to between AD 665 and AD 865 (intercept date of AD 790) with a 68% probability  
2719 of dating to between AD 690 and AD 775 (send to Centrum Voor IsotopenOnderzoek, Groningen).  
2720 The date-range and mode of burial confirms this individual was likely to have been part of the hordes  
2721 of Viking warriors which descended on Ireland from the late 8<sup>th</sup> century onwards. That the skeleton  
2722 formed part of a larger group of burials was also indicated by the subsequent excavations in Golden

2723 Lane by Edmond O'Donovan where four additional Viking skeletons (including a female) were  
2724 found, one of which lay just 5m west of the Ship Street burial. These were interred in the environs of  
2725 an Early Christian cemetery and were all of a similar date. Four skeletons with some with weaponry  
2726 had been found previously 150 m to the north-east, at South Great George's Street, and isotope  
2727 analysis of these suggest that two were reared in the Scandinavian region while the other two were  
2728 reared closer to the Atlantic (in and around the British Isles), presumably in Viking colonies on the  
2729 Western or Northern Scottish isles<sup>130,134–136</sup>.

2730

2731 Samples used for DNA analysis

2732 VK545 Ireland\_SSG12

2733

#### 2734 **Acknowledgements**

2735 The authors are grateful to Mr John Kavanagh, excavator at Finglas, for providing information on his  
2736 excavation, and also to Ms Laureen Buckley, Dr Denise Keating and Dr Barra Ó Donnabháin who  
2737 analysed the remains from the sites mentioned above.

2738 **Iceland**

2739 **Hildur Gestsdóttir, Institute of Archaeology, Iceland**

2740

2741 **Hofstaðir, Mývatnssveit**

2742 The farm of Hofstaðir in Mývatnssveit in northern Iceland lies to the west of Lake Mývatn, and is  
2743 bordered to the west by the river Laxá (Fig. S1.8). A Viking Age hall lies within the home-field of  
2744 the Hofstaðir farm, west of the current farmhouses and up against a small scarp that demarcates the  
2745 arable part of the home-field (the home-field boundary lies on top of the scarp). Excavations there,  
2746 carried out under the direction of Gavin Lucas between 1996 and 2002, indicate that the hall was built  
2747 in the middle of the 10<sup>th</sup> century. The site of the church and cemetery at Hofstaðir is within the home-  
2748 field of the modern farm, 80 m southwest of the Viking Age hall, up against the eastern edge of the  
2749 old farm-mound, which was abandoned in the middle of the 20<sup>th</sup> century. The cemetery sits on the  
2750 eastern edge of the farm-mound.

2751 Excavations of the site were carried out 2000-2004 and again 2010-2015. The excavations revealed  
2752 at least two, possibly three phases of church structures in the center of an octagonal area bordered by  
2753 a turf wall. Little remains of the earliest church, which appears to have been deliberately demolished,  
2754 except post-foundations and remains of a trampled floor. Radiocarbon and tephrochronolgy dating  
2755 indicate that this earliest church was established in the mid 10th century. The later church was built  
2756 on the same spot as the earlier one, although the later church was slightly smaller. Tephrochronology  
2757 indicates that this later structure was built before the 1300 eruption in Katla, which also seals all  
2758 burials within the cemetery. The earliest graves clearly respect the oldest structure on the site, and  
2759 recent radiocarbon dating of six of the skeletons from the site dated from 695-1148, although this  
2760 range can be tightened in some instances as many of the burials clearly post-date the tephra from the  
2761 940 eruption in Veidivötn.

2762 A total of 170 skeletons were excavated at Hofstaðir, mostly from in situ burials, although there are  
2763 four examples of redeposited graves. There is clear organization of the cemetery, as seen in other  
2764 medieval cemeteries in Iceland. Females are mostly buried in the northern half, males mostly in the  
2765 southern half and children up against the church; in particular, up against its southern wall. The burials  
2766 are all inhumations. The grave-cuts are very tightly spaced with a lot of intercutting, especially in the  
2767 area where the children are buried. All the burials are supine with the hands usually resting on the  
2768 abdomen or alongside the body. About half of the adult burials were in simple wood-coffins of which  
2769 nothing survived except wood-staining of the soil. The surviving depth of the burials ranged between  
2770 30 cm (in areas where there had been levelling of the land for agricultural purposes in the middle of

2771 the 20<sup>th</sup> century) to about 80 cm (which represents the maximum depth of the burials while the  
2772 cemetery was in use. Preservation in the cemetery was on average good and in most instances, quite  
2773 consistent although there were a couple of locations where variations had clearly caused the creation  
2774 of micro-environments within the cemetery. An example of this is the small porch which had been  
2775 added to the later church on top of three graves located immediately west of it. This resulted in poorer  
2776 preservation of the skeletal material in these graves than in the rest of the cemetery.  
2777 Bioarchaeological analysis of the skeletons from Hofstaðir have indicated a very high prevalence of  
2778 inherited osteoarthritis, indicating that the people buried within the cemetery were closely  
2779 biologically related<sup>137,138</sup>.

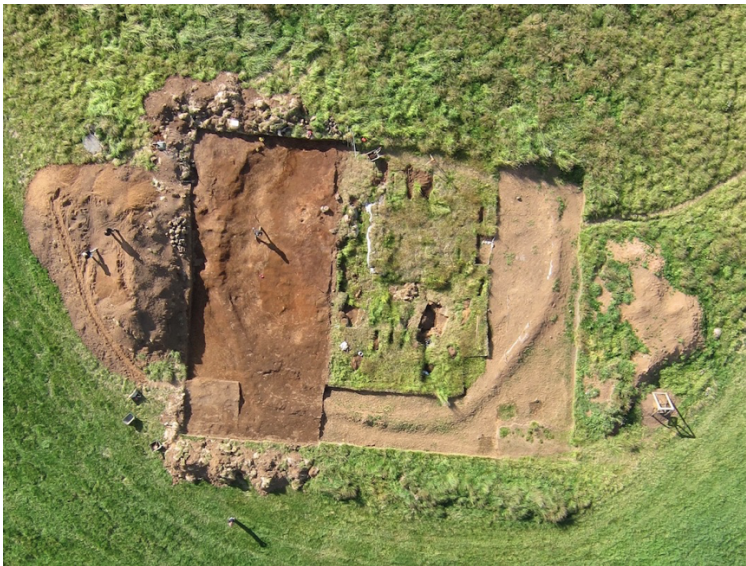

2781  
2782 **Fig. S1.8:** Aerial view of the Hofstaðir archaeological site.

- 2783
- 2784 Samples used for DNA analysis
- 2785 VK95 Iceland\_HSM-A-127
  - 2786 VK98 Iceland\_HSM-A-083
  - 2787 VK99 Iceland\_HSM-A-104
  - 2788 VK101 Iceland\_HSM-A-125
  - 2789 VK102 Iceland\_HSM-A-128
  - 2790 VK110 Iceland\_HSM-A-115S
  - 2791 VK111 Iceland\_HSM-A-118
  - 2792 VK122 Iceland\_HSM-A-114
  - 2793 VK123 Iceland\_HSM-X-104

2794 VK225 Iceland\_HSM-A-108  
2795 VK226 Iceland\_HSM-A-115N  
2796 VK227 Iceland\_HSM-A-117  
2797 VK228 Iceland\_HSM-A-120  
2798 VK230 Iceland\_HSM-A-123

2799

## 2800 **Ingiríðarstaðir, Þegjandadalur**

2801 Þegjandadalur is a largely abandoned valley in northern Iceland, with limited areas of pasture towards  
2802 the mouth of the valley, to the north. Elevation above sea level rises from circa 40 m at the valley  
2803 mouth to circa 180 m at the head of the valley. The valley runs broadly north – south for  
2804 approximately 7 km, and is up to 1.6 km at its widest. The area of lowland is approximately 7.3 km<sup>2</sup>.  
2805 The valley walls rise steeply to eroded heathland in the east, at circa 400 m, and more gently to better  
2806 vegetated heathland in the west at c. 230 m. At the southeastern limit of the valley a saddle gives  
2807 access to Laxárdalur, at about 250 m above sea level. The grave field at Ingiríðarstaðir was discovered  
2808 in 2008, as a result of the wider study of a complex and remarkably well preserved archaeological  
2809 landscape in the valley of Þegjandadalur, in the county of Þingeyjarsýsla in northeastern Iceland.  
2810 Excavation of the grave field was carried out between 2008-2015. The excavation revealed eight adult  
2811 inhumation burials as well as the remains of seven horses in six burials, all of which had been  
2812 disturbed in antiquity. In addition, a single undisturbed neonatal skeleton inhumation burial was  
2813 recovered.  
2814 Radiocarbon and tephrochronological dating indicate a date of late 9<sup>th</sup>-early 11<sup>th</sup> century AD.  
2815 Recent isotope analysis has demonstrated that the individuals buried at Ingiríðarstaðir were born in  
2816 the region<sup>139</sup>.

2817

2818 Samples used for DNA analysis

2819 VK129 Iceland\_ING08

2820

## 2821 **Hringsdalur, Arnarfirði**

2822 In the summer of 2006 human remains and artefacts were discovered in an eroded sandbank on a  
2823 small peninsula, Hreggnasi, which lies in the sea by the Hringsdalur valley in Arnarfjörður in the  
2824 Westfjords in Iceland. This resulted an archaeological investigation of the area between 2006-2011.  
2825 The excavation revealed 4-5 burials, including one boat burial, which contained the disturbed remains



2826 of four adults, as well as a single undisturbed inhumation burial. A further 2-3 disturbed burials were  
2827 located at the site.

2828 Dating of the site has mainly been based on artefact typology, placing it in the 10<sup>th</sup> century AD<sup>140</sup>.

2829

2830 Samples used for DNA analysis

2831 VK127 Iceland\_HDR08

2832 VK128 Iceland\_HDR111

2833

2834

2835 **Greenland**

2836 **Jette Arneborg, The National Museum of Denmark**

2837

2838 **Sandnes, Kilaarsarfi V51**

2839 The Sandnes farm is lying close to the shore at the head of Ameralla fjord and has an associated  
2840 church. This site is considered as the largest in the southern part of the Norse Western Settlement.  
2841 The open valley behind the farm offered plenty of pasture while the nearby river supplied water for  
2842 the farm. Today, the church is sanded up and flooded at high tide, clearly showing the dramatic  
2843 changes of the landscape that has been happening since the first Norse settlers arrived. Ten ruins have  
2844 been recorded on the Kilaarsarfik plain during the course of multiple expeditions. An unknown  
2845 number of ruins have been lost to the fjord<sup>141</sup>. Church and churchyard were excavated in 1930 and  
2846 1932.

2847 The discovered artefacts and radiocarbon dates indicate that the Sandnes farm was occupied from c.  
2848 1000 AD up until the time of the depopulation of the Western Settlement in the later part of the 14<sup>th</sup>  
2849 century. Sr isotopic analysis of skeletons from the church yard from the later settlement period  
2850 indicate that they were brought up in Greenland<sup>142</sup>.

2851

2852 Samples used for DNA analysis

2853 VK74 Greenland\_V051\_0928

2854 VK75 Greenland\_V051\_KAL-0929 / skeleton 11

2855 VK76 Greenland\_V051\_KAL-0957 / skeleton 27

2856 VK77 Greenland\_V051\_KAL-0959 /skeleton 31

2857 VK78 Greenland\_V051\_KAL-0960 / skeleton 30

2858 VK196 Greenland\_V051\_KAL-0947 /skeleton 22

2859

2860 **Ujarassuit (Anavik) V7**

2861 The Anavik farm is situated on a raised beach terrace at Ujarassuit fjord. The houses and the church  
2862 lie spread over the large flat plateau where conditions for farming would have been excellent during  
2863 the Viking Age. Nine house ruins have been recorded at the site, including one of the most well-  
2864 preserved stone houses in the Western Settlement.

2865 The main excavations of the site were carried out in 1932, when multiple buildings were identified.  
2866 New excavations were conducted in 1982 when a small trench was opened in the churchyard to obtain  
2867 human remains for  $\delta^{13}\text{C}$  analysis. Radiocarbon dates and the positioning of the arms of the dead

2868 date the excavated burials to the 13<sup>th</sup>–14<sup>th</sup> century. The analysis of  $\delta^{13}\text{C}$  indicated, that the diet of  
2869 the analyzed individuals was mainly marine<sup>143,144</sup>.

2870

2871 Samples used for DNA analysis

2872 VK189 Greenland\_V007\_KAL-0992 / skeleton U04

2873

#### 2874 **Narsarsuaq Ø149**

2875 The Ø149 site is a Norse high-status farm with a connected church at Narsarsuaq in Uunartoq Fjord  
2876 and was first recorded in 1921 by Poul Nørlund and identified as the remains of a Benedictine  
2877 nunnery. The farm is located on a peninsula between Lichtenau Fjord and Uunartoq Fjord in the  
2878 southern region of the Eastern Settlement close to the hot springs on the island of Uunartoq. 21  
2879 features, including the church, living houses, byres, stables and barns have been recorded on the site.  
2880 The first archaeological excavations were conducted in 1945-46 and again in 1948 lead by C.L.  
2881 Vebæk. Few Norse ruins were investigated such as the church and the churchyard, sections of the  
2882 dwelling, a small stable and the stable/barn complex. The church belongs to the later phase of the  
2883 settlement from about 1300 but has had one or more predecessors. The human remains from the  
2884 grave yard were radiocarbon dated to c. 14<sup>th</sup> century<sup>143,145</sup>. Sr isotopic analysis of skeletons from the  
2885 church yard indicate that the buried were local Greenlanders<sup>142</sup>.

2886

2887 Samples used for DNA analysis

2888 VK190 Greenland\_Ø149\_KAL-0996 / skeleton 3, grave unit I

2889 VK191 Greenland\_Ø149\_KAL-1000 /skeleton 7, grave unit I

2890

#### 2891 **Ruin group Ø64**

2892 The farm site of E64 is located in Igaliku Kujalleq, a small side branch of Igaliku fjord in the Norse  
2893 Eastern Settlement. 12 features have been recorded on the site among which are a small church  
2894 belonging to the group *landnam* churches that were established from the late 10<sup>th</sup> century-around  
2895 1000. The church yard was excavated in 2007-08 led by Jette Arneborg. The excavated skeletons  
2896 were radiocarbon dated within the period from late 10<sup>th</sup> century to about 1200. Sr isotope analysis  
2897 indicates that several of the buried were immigrants from Iceland<sup>142</sup>.

2898 X530, x532, x677 and x678 were all buried in the same grave.

2899

2900 Samples used for DNA analysis  
2901 VK1 Greenland\_Ø64\_KNK2655x677  
2902 VK6 Greenland\_Ø64\_KNK2655x678  
2903 VK9 Greenland\_Ø64\_KNK2655x530  
2904 VK11 Greenland\_Ø64\_KNK2655x532  
2905 VK186 Greenland\_Ø64\_KNK2655#78  
2906 VK187 Greenland\_Ø64\_KNK2655#72

2907

2908 **Brattahlid, Qassiarsuk, Ø29a**

2909 The site is located on the Qassiarsuk plain in Tunulliarfik Fjord where 60 ruins are recovered and  
2910 identified as the high-status farm Brattahlid, where one of the first Norse settlers such as Erik the Red  
2911 settled with his family in the mid-AD 980s.

2912 The northernmost farm at Qassiarsuk identified as the ruin group Ø29a, is thought to have been that  
2913 of Erik the Red. According to Icelandic sagas Tjodhilde, the wife of Erik the Red had a church built  
2914 on the farm around 1000, and the remains of a small church found in the beginning of the 1960s have  
2915 been identified with Tjodhildes church mentioned in the sagas. Later radiocarbon dates of skeletons  
2916 from the church yard indicate, that the small church was built at the time of settlement in the late 10<sup>th</sup>  
2917 century. The church yard was taken out of use in the beginning of the 1200s and the church site  
2918 relocated<sup>143</sup>.

2919 There was a sex bias in the arrangement of the graves in the churchyard. The southern side of the  
2920 church was mostly for high status men while many of the women were buried on the north side. A  
2921 few high-status women were also buried on the south side, whereas a few low-status men were buried  
2922 on the north side, and studies show that there were clear differences of both stature and the teeth  
2923 conditions between people buried on the south and north sides, likely reflecting the social structure  
2924 of the Norse society<sup>146</sup>.

2925 A mass grave was also excavated on the south side of the church with 13 adult men and two boys of  
2926 10 and 17 years of age, respectively. This was a secondary grave since the bones of the skeletons did  
2927 not lie in situ, indicating that the remains might have been moved to “Tjodhildes Church” from  
2928 another grave or they may have died far away, and their bones were subsequently brought to  
2929 Brattahlid for burial. Studies by Alexandersen and Prætorius<sup>146</sup> suggest that the individuals buried in  
2930 the mass grave might have relatives. Sr isotopic analyses indicated that some of the buried at  
2931 Tjodhildes church were immigrants from Iceland<sup>142</sup>.

2932 Samples F2, F3, F5, F6, F7, F8 and F9 are from the mass grave.

2933

2934 Samples used for DNA analysis

2935 VK513 Greenland\_Ø029a\_KAL-1088 / skeleton F8

2936 VK179 Greenland\_Ø029a\_KAL-1092 /skeleton F2

2937 VK180 Greenland\_Ø029a\_KAL-1091 /skeleton F3

2938 VK182 Greenland\_Ø029a\_KAL-1085 /skeleton F5

2939 VK183 Greenland\_Ø029a\_KAL-1086 /skeleton F6

2940 VK184 Greenland\_Ø029a\_KAL-1087 / skeleton F7

2941 VK185 Greenland\_Ø029a\_KAL-1089 /skeleton F9

2942 VK193 Greenland\_Ø029a\_KAL-1061 /skeleton 75

2943

2944

2945

2946 **The Church Site In Sandur, Sandoy, Faroe Islands**  
2947 **Símun V. Arge, Tjóðsavnið - Faroe Islands National Museum**  
2948

2949 **Settlement by the bay Sandsvágur**

2950 According to the Færeyingasaga a man, Sniðálvur, lived in the village of Sandur in the Viking period.  
2951 Local legends have it, that he lived at á Krossi by the church, and that he had fled from the Hebrides  
2952 because of a charge of manslaughter.

2953 Remains of ancient occupation have regularly been made visible by erosion of the coastline on both  
2954 sides of the bay of Sandsvágur. Extensive Viking Period settlement have now been revealed by and  
2955 north of the ancient church site, which have been dated back into the Viking Period. At the site of á  
2956 Sondum settlement activity has been dated to 4<sup>th</sup>-6<sup>th</sup> century – the earliest dated proofs of human  
2957 settlement in the islands even this has not been a continued settlement. The village of Sandur is the  
2958 largest agricultural area in the islands, which may have been especially attractive for the  
2959 landnámsman when he should choose a site to settle. Settlement historical investigations and place-  
2960 name studies indicate three larger farms in the village already in the Viking Period<sup>147</sup>.  
2961

2962 **The church site in Sandur**

2963 Archaeological excavations within the church as well as at the church site at Sandur, við Kirkjugarð,  
2964 have often revealed remarkable finds. Prior to professional excavations took place the only coin hoard  
2965 in the islands so far turned up in 1863–98 silver mints deriving from the Continent, Ireland, UK and  
2966 Scandinavia, hidden by the end of the 11<sup>th</sup> century. Archaeological investigations inside the church  
2967 1969-70 revealed five of the present church's predecessors, built in 1839. The first church at the site  
2968 was a small, plain wooden stave-church apparently dating from the 11<sup>th</sup> century. This church was  
2969 replaced by a much larger church, Church 2; both churches had a Romanesque plan. The church-  
2970 typology and the archaeological finds indicate that Church 2 was erected in late 12<sup>th</sup> or early 13<sup>th</sup>  
2971 century. The archaeological excavation at the church in Sandur is of significant meaning concerning  
2972 the development of the Faroese parish church.

2973 Excavations in the extended area of the churchyard to the south of the church during the period 1970–  
2974 2009 extensive settlement remains turned up in the 3000 m<sup>2</sup> large area. Rather than the proper  
2975 habitation site this area is interpreted as an activity area with the remains of different activities. Also,  
2976 a Viking Period burial ground turned up here, where 12 graves were found of which 7 have been  
2977 investigated. The dead were buried with personal belongings indicating a high-status society in the  
2978 10<sup>th</sup> century. The proper settlement area is to be found to the north of the church site where

2979 archaeology has verified deep stratified settlement layers along the eroding cliff edge from the period  
2980 8<sup>th</sup>-early 13<sup>th</sup> century.

2981

## 2982 **Burials in Church 2**

2983 In the nave of the second church at the site, Church 2 – the first one being a small wooden stave-  
2984 church apparently dating from the 11<sup>th</sup> century - 23 burials were found, obviously established in a  
2985 planned manner below the wooden floor of the church, why this might have occurred during a  
2986 restricted period of time (Extended Data Fig. 8c). Most of the dead were buried in wooden coffins,  
2987 though a few were interred in the grave in grave clothes only. The coffins were of the trapezoid  
2988 medieval type.

2989 7 of the buried were adults and 16 were children. Of the seven adults, three were women and four  
2990 were men, all over the age of 35. Child mortality in the medieval period was high and of the 16  
2991 children all but one died before their first year and most just a few months after birth. This child was  
2992 approximately 4 years old when it died.

2993 It is astonishing that both men, women and children are buried in the nave of the church. Usually only  
2994 the priests were buried inside the church in the Middle Ages – at least outside the urban centers. The  
2995 question arises whether this church may have had a special status which was different from a normal  
2996 parish church. If the church was privately owned, it would have been reasonable to find members of  
2997 the family of the owners amongst the buried within the church. Therefore, it is possible that those  
2998 who are resting here are family members of the main farm here in Sandur, to which the church  
2999 belonged.

3000 The great calcoid content in the sand and the fact that they have been located inside the following  
3001 churches protected by the rain causes that the outstanding preservation of the skeletons. This material  
3002 is of special value to the understanding of the Medieval Faroese population.

3003 The archaeological context makes the church site in Sandur one of the most interesting and promising  
3004 historical sites in the Faroe Islands<sup>147</sup>.

3005

3006 Samples used for DNA analysis

3007 VK25 Sandoy\_Church2\_grave28

3008 VK27 Sandoy\_Church2\_grave8

3009 VK44 Sandoy\_Church2\_grave29

3010 VK45 Sandoy\_Church2\_grave13

|      |                                       |
|------|---------------------------------------|
| 3011 | VK46 Sandoy_Church2_grave14           |
| 3012 | VK234 Sandoy_Church2_grave23          |
| 3013 | VK236 Sandoy_Church2_grave27          |
| 3014 | VK237 Sandoy_Church2_grave32          |
| 3015 | VK238 Sandoy_Church2_grave22          |
| 3016 | VK239 Sandoy_Church2_grave16          |
| 3017 | VK240 Sandoy_Church2_grave7           |
| 3018 | VK241 Sandoy_Church2_grave17          |
| 3019 | VK242 Sandoy_Church2_grave31          |
| 3020 | VK244 Sandoy_Church2_grave24          |
| 3021 | VK245 Sandoy_Church2_grave15          |
| 3022 | VK248 Sandoy_Church2_grave_B          |
| 3023 | VK24 Á Bønhúsfløtu_Nesi_Hvalba_grave1 |
| 3024 |                                       |
| 3025 |                                       |
| 3026 |                                       |



3027 **Salme, Estonia**  
3028 **Jüri Peets, Tallinn University, Estonia**  
3029

3030 In autumn 2008 remains of human skeletons and ancient artefacts (sword fragments, rivets, gaming  
3031 pieces, dice, etc.) were brought to light while digging an electrical cable trench for the lighting of a  
3032 cycling track near the Salme borough on the island of Saaremaa in Estonia. Archaeological rescue  
3033 excavations revealed that the finds came from a partly destroyed boat burial (Salme I). It was probably  
3034 a rowing ship approximately 11.5 m long and ca 2 m wide. Fragments of three swords and other  
3035 weapons, a lot of gaming pieces etc. were found as grave goods<sup>148</sup>. Skeletal remains of seven  
3036 individuals were found, including some partial skeletons *in situ* (Fig. S1.9); also a lot bones of  
3037 domestic animals, and the remains of goshawk (*Accipiter gentilis*) and sparrow hawk (*Accipiter*  
3038 *nisus*) were found<sup>149</sup>.

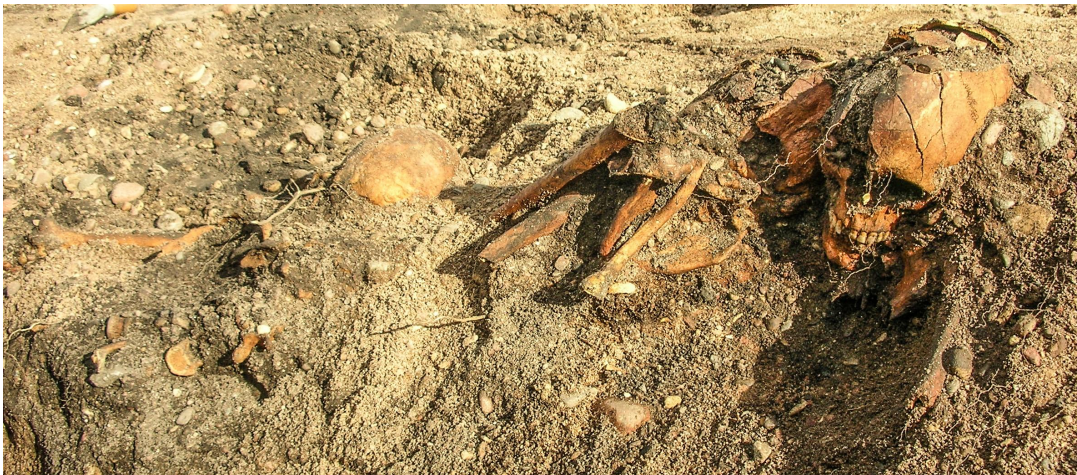

3039  
3040 **Fig. S1.9:** Skeletal remains *in situ* in Salme I ship burial.

3041  
3042 As a result of fieldwork during two summers (2010–2011) the second ship of Salme (Salme II) was  
3043 discovered; practically the whole ship contour, which in the middle part could be observed to the  
3044 height of 5–6 rivet rows, together with the remains of 34 warriors was unearthed<sup>150,151</sup>. The skeletons  
3045 lay in three layers mostly in an area of about 3 x 4 m in the central part of the ship. In the two upper  
3046 layers the perished warriors had been placed heads pointing NE, in the same direction as the ship. In  
3047 the bottom layer they had been placed between the ribs, transverse with the longitudinal axle of the  
3048 ship, heads pointing alternately east and west. The dead had been provided with rich grave goods,  
3049 which mostly consisted of weapons, including more than 50 arrowheads, some spears and about 40  
3050 swords (whole and broken). At least five swords had hilts of gilded bronze, among them one ring-hilt  
3051 sword with a blade of pattern welded steel. One sword had a blade ornamented with an inlay of golden

3052 wire and a handle decorated with garnets. Other items included nearly 300 gaming pieces of whale  
3053 bone, antler combs, small padlocks, whetstones of schist, beads etc. The dead had been covered with  
3054 shields with iron bosses. Besides the remains of meat animals, among osteological material of the  
3055 Salme II ship some bones of goshawk and peregrine falcon (*Falco peregrinus*), and lots of mallard  
3056 (*Anas platyrhynchos*) bones were recovered. At least five or six dogs had been buried in the ship, all  
3057 in the top layer at the boards of the ship. The original length of the vessel, considering the proportions  
3058 of the preserved remains, could have been 17–17.5 m or more<sup>152</sup>. Unlike the ship discovered in 2008,  
3059 this ship may have moved also by sail<sup>151</sup>.

3060

3061 Apparently the most important individual was the man (skeleton XII (L)) who was buried in the  
3062 middle of the first row of the second layer in the mass burial of Salme II ship. He had a valuable ring  
3063 sword (blade broken in several pieces), and warriors with shouldered swords placed at each side.  
3064 Most likely the fallen warriors in the Salme I ship had been buried with as much homage and weapons  
3065 as those in the second one. Apparently, they had been also covered with shields, of which,  
3066 unfortunately, only shield rivets with domed heads have preserved. Artefact finds and <sup>14</sup>C analyses’  
3067 results of samples of human bones suggest the origin of the burials in the same “event”, that took  
3068 place in about 750 AD. The “event” may have been an armed conflict and the perished warriors-  
3069 seafarers were buried in two mass graves in the ships on the seashore. The shape of the weapons and  
3070 other artefacts of both ships allow us to date them to the Late Vendel Period. Most of the finds belong  
3071 to the Vendel Age period VII: 4 (c. 700–750 AD)<sup>153</sup> or earlier. An overwhelming part of human bones  
3072 of both ships (4 samples of 7 persons from Salme I ship and 9 samples of 34 person from Salme II  
3073 ship) were dated by <sup>14</sup>C (94,5%) to the 650–780 cal AD, but some samples, nevertheless, gave results  
3074 up to 940 cal AD<sup>148,150</sup>. At the same time the earliest and the latest datings of samples from both  
3075 ships are practically identical: the earliest is the dating of skull SaI: 3 from the Salme I ship, resulting  
3076 in 1320±30 BP (Hela-1915), i.e. 650–780 cal AD and the latest of skeleton SaI: 4 that gave the result  
3077 of 1200±30 BP (Beta-509634), i.e. 700–940 cal AD, whereas the respective datings of the samples  
3078 from the Salme II ship are of skeleton XV (O), resulting in 1330±30 BP (Poz-109002), i.e. 649–767  
3079 cal AD and of skeleton XII (L), resulting in 1199±32 BP (Ua-50746), i.e. 700–940 cal AD, both  
3080 skeletons originated from the second burial layer (Extended Data Fig. 1a). Most results of the analyses  
3081 of animal bones remain within these limits. The reason for such great difference in the dating results  
3082 is unclear. All analyzed samples were taken from materials without any later impact, i.e. all samples  
3083 were taken from bones that were not disturbed after burial. Resolving this phenomenon is of utmost

3084 importance, considering that four skeletons, identified genetically as brothers, and the dating of their  
3085 skeletons also differed considerably. In addition to the above mentioned skeleton XV (O), dated as  
3086 the oldest (1330±30 BP), also skeletons of two other brothers were dated, i.e. skeleton XIV (N)  
3087 1295±32 BP (Ua-50747), and XXII (V) 1250±30 BP (Beta-509632). The skeleton XXVI (Ö), the  
3088 fourth brother is currently not dated. Results of isotope analysis (study of  $^{87}\text{Sr}/^{86}\text{Sr}$ ,  $^{18}\text{O}/^{16}\text{O}$  and  
3089  $^{13}\text{C}/^{12}\text{C}$  isotopes value in human dental enamel and bones) show that the warriors buried in the mass  
3090 graves in the ships came from Central Sweden<sup>30</sup>.

3091

3092 Samples used for DNA analysis

3093 VK480 Estonia\_Salme\_II-VI(E)

3094 VK481 Estonia\_Salme\_II-IV(F)

3095 VK482 Estonia\_Salme\_II-XVI(P)

3096 VK483 Estonia\_Salme\_II-XXII(V)

3097 VK484 Estonia\_Salme\_II-XVII(Q)

3098 VK485 Estonia\_Salme\_II-XV(O)

3099 VK486 Estonia\_Salme\_II-VII(G)

3100 VK487 Estonia\_Salme\_II-I(A)

3101 VK488 Estonia\_Salme\_II-VIII(H)

3102 VK489 Estonia\_Salme\_II-XXV(Ä)

3103 VK490 Estonia\_Salme\_II-XIV(N)

3104 VK491 Estonia\_Salme\_II-XXIV(Ö)

3105 VK492 Estonia\_Salme\_II-II(B)

3106 VK493 Estonia\_Salme\_II-XXXIV(Š)

3107 VK495 Estonia\_Salme\_II-III(C)

3108 VK496 Estonia\_Salme\_II-XXIII(W)

3109 VK497 Estonia\_Salme\_II-XXVI(Ö)

3110 VK498 Estonia\_Salme\_II-XXXII(Z)

3111 VK504 Estonia\_Salme\_I-1

3112 VK505 Estonia\_Salme\_I-2

3113 VK506 Estonia\_Salme\_I-3

3114 VK507 Estonia\_Salme\_I-4

3115 VK508 Estonia\_Salme\_I-5

- 3116 VK509 Estonia\_Salme\_I-6
- 3117 VK510 Estonia\_Salme\_I-7
- 3118 VK511 Estonia\_Salme\_II-XXVIII(X)
- 3119 VK512 Estonia\_Salme\_II-XXVII(Ü)
- 3120 VK549 Estonia\_Salme\_II-X(J)
- 3121 VK550 Estonia\_Salme\_II-V(D)
- 3122 VK551 Estonia\_Salme\_II-XXI(U)
- 3123 VK552 Estonia\_Salme\_II-XI(K)
- 3124 VK553 Estonia\_Salme\_II-XIII(M)
- 3125 VK554 Estonia\_Salme\_II-XII(L)
- 3126 VK555 Estonia\_Salme\_II-IX(I)
- 3127
- 3128
- 3129

3130 **Glyn, Llanbedrgoch, Anglesey (Wales)**  
3131 **Mark Redknap, National Museum Cardiff**  
3132

3133 Excavations by Amgueddfa Cymru – National Museum Wales at Glyn, Llanbedrgoch between 1994  
3134 – 2001, in 2004 and in 2012 uncovered a small early medieval settlement which by the late ninth  
3135 century had developed into a large entrepôt and regional centre about one hectare in size serving the  
3136 kingdom of Gwynedd. During the second half of the ninth century a stone rampart was built to provide  
3137 additional security<sup>154</sup>. In the second half of the ninth century rectangular timber buildings with  
3138 ground-fast posts were remodelled, having sunken floors and sill-beam construction resting on low  
3139 stone walls. A rich array of ninth/tenth-century artefacts reflect an Insular mix of local, Anglo-Saxon  
3140 and Irish styles, as well as contact with the Scandinavian world (Hiberno-Norse hack-silver,  
3141 fragments of Kufic silver coin, lead weights of different types, some capped with decorative  
3142 metalwork, ringed pins and a fragment of oval brooch).

3143 The excavations have provided evidence for the organised use of space for activities such as iron  
3144 working, baking, bronze smithing, waste disposal, sleeping, cooking and burying. An unexpected  
3145 bonus was the discovery in 1998 and 1999 of the remains of five people buried in a seemingly  
3146 haphazard manner in the upper fill of the ditch outside the rampart. This raised questions about not  
3147 only the identities of those buried so unceremoniously, but also the settlement's fate, who occupied  
3148 it during the tenth century and their status. The preliminary osteological report identified a young  
3149 adult female, a young adult male, a mature adult male and two adolescents, and radiocarbon dates  
3150 pointed to their deaths occurring in the mid- to second half of the tenth century, burial possibly later  
3151 in the early eleventh century<sup>154</sup>.

3152 The irregular disposition and orientation of the bodies and the observation that the wrists of one adult  
3153 male (burial 3) appeared to have been tied behind the back, suggested a non-normative burial rite  
3154 given that Christian burial within cemeteries was, by now, standard for the local population.  
3155 Radiocarbon dates, stratification and the absence of late-tenth or early eleventh-century coins  
3156 suggested that they had been buried during a final phase of occupation of the site in the tenth  
3157 century<sup>154</sup>.

3158 During facial reconstruction work it was suggested that some of these features pointed to a genetic  
3159 relationship between the skulls, either familial or more probably because the individuals originate  
3160 from a small gene pool (Caroline Wilkinson, *in litt.*). Consequently it was considered possible that  
3161 they represented local islanders, perhaps the victims of a Viking attack on the Anglesey<sup>154</sup>. This view  
3162 is no longer held<sup>155</sup>.

3163 Since 2004, the human remains from Llanbedrgoch have undergone a complete osteological  
3164 reassessment by Professor Alice Roberts in order to establish the demographic profile and health  
3165 status of the individuals. This has refined the estimated age at death, and included a further  
3166 inhumation found in 2012, just north of the 1998-99 inhumations.

3167 Multiple isotope analysis for palaeodietary reconstruction and to identify the childhood place of  
3168 origin of these individuals has now been conducted on burials 1-7 by Katie Hemer as part of her PhD,  
3169 the analytical work being undertaken at the NERC Isotope Geosciences Laboratory in Nottingham  
3170 following the award of a grant from NERC. Strontium results provide the most compelling evidence  
3171 in the case of the Llanbedrgoch individuals because the signatures are distinctive. Full report on these  
3172 burials is in preparation (Hemer, Roberts and Redknap, in prep.).

3173 Juvenile burial 4 (context 737) sampled for DNA analysis, provided two radiocarbon dates: Beta-  
3174 150715: 1030+/-40BP, Cal AD 960-1040; OxA-33786, 1055+/- 40 (2016) Cal AD 892-1031. Stable  
3175 isotope analysis (strontium and oxygen) of this juvenile (9.5-14 years old) by Dr Katie Hemer  
3176 suggests that he may have grown up between the ages of three and seven in parts of mid-Wales or on  
3177 the border of England, while the other adult male (burial 3, with his wrists tied) in the same burial  
3178 had strontium values consistent with old or radiogenic geologies found in parts of Scotland, Denmark  
3179 or further afield in southwest Norway, and oxygen values within the range expected for the British  
3180 Isles. None of the extra-mural burials grew up on Anglesey, and they appear to have grown up in  
3181 places with diverse geologies and climate<sup>155</sup>.

3182 The archaeological context of this extra-mural cluster suggests that they may have been treated in  
3183 death as incomers, outcasts because they were not local and perceived to be non-Christian, perhaps  
3184 instilling fear or suspicion in the minds of those responsible for their burial. Bearing in mind the raids  
3185 from Man in the 970s and 980s, some may have been hostages or slaves of the Welsh, if not free  
3186 traders. These results are still under discussion.

3187

3188 Samples used for DNA analysis

3189 VK171 Wales\_Cardiff\_burial#4\_GL99

3190
