# Supplementary material for: Population genomics of the Viking world
Source: bioRxiv or medRxiv preprint supplement (doi:10.1101/703405), 2019-07-17
Supplement: Supplementary file [file media-2.pdf]

## **SUPPLEMENTARY INFORMATION**

### **Supplementary Note 2. Ancient DNA laboratory procedures and sample selection**

#### **Ancient DNA extraction**

All aDNA laboratory procedures were conducted in the special aDNA clean-room facilities at Centre for GeoGenetics, Natural History Museum, University of Copenhagen according to strict aDNA standards<sup>156,157</sup>. The overwhelming majority of ancient samples were petrous bones and teeth (Supplementary Table 1). To maximize the yield of endogenous DNA from ancient human samples we targeted the cementum (the hard and relatively well preserved outer layer of the tooth roots)<sup>158</sup> or the otic capsule of the petrous bones<sup>159</sup>.

The drilled bone sample (ranging from 100 to 400 mg) was briefly digested in digestion buffer (4.65 ml 0.5 M EDTA, 50 µl recombinant Proteinase K, 50 µl 100x TE and 250 µl 10% N-Laurylsarcosyl) for 45 minutes at 40°C (pre-digestion step)<sup>158</sup>. After this, the samples were centrifuged for 2 minutes at 2000g and the resulting supernatant was removed. To the bone material, an identical digestion buffer was added for a full 24-hour digestion at 40°C. After this digestion step, the samples were centrifuged for 5 minutes at 2000g and the remaining undigested pellets were stored for later re-extraction. Silica-powder-based DNA extraction protocol was used to extract the aDNA from 2 ml digested solution. The water based suspension of silica was prepared by mixing 6g of SiO<sub>2</sub> with 50 ml H<sub>2</sub>O. After 1 hour of sedimentation, the top 48 ml supernatant was transferred to a new 50 ml tube. This was followed by another 5-hour sedimentation after which the top 43 ml of the supernatant was discarded and the silica was re-suspended and activated by 60 µl 37% HCL. To each of 2 ml digested sample, 20 mL of the binding buffer (19.54 ml Qiagen buffer PB, 360 µl 5M sodium acetate, 100 µl 5M sodium chloride) and 100 µl silica suspension was added and adjusted to pH 4-5 with 37% HCl<sup>160</sup>. This was followed by a 1-hour incubation at room temperature after which the supernatant was removed by a brief centrifugation step for 2 minutes at 2000×g. The silica was re-suspended in 1 ml binding buffer, transferred to 2ml Eppendorf tubes, centrifuged and washed twice with 80% ice-cold ethanol. The DNA was released from silica particles by 70 µl Qiagen EB buffer. With each round of extractions, negative controls were used.

## NGS library preparation and sequencing of ancient samples

From 20 µl double-stranded DNA extracts blunt-end DNA libraries were prepared using Illumina-specific adapters and NEBNext DNA Sample Pre Master Mix Set 2 (E6070) kit according to the manufacturer's instructions with few below-mentioned modifications:

The end-repair step was conducted in 25 µl reactions using 20 µl of DNA extract. This was incubated for 20 mins at 12°C and 15 mins at 37°C, purified using PB buffer with Qiagen MinElute spin columns, and eluted in 17 µl EB buffer. This was followed by ligation (25 µl reactions) of the Illumina-specific sequencing adapters prepared according to Meyer and Kircher 2010<sup>161</sup>. This step was carried out for 15 mins at 20°C and the resulting DNA-adapter complex was purified using PB buffer and Qiagen MinElute columns, before eluting in 20 µl EB Buffer. The last, adapter fill-in reaction was conducted in 30 µl volume and incubated for 20 mins at 65°C followed by 20 mins at 80°C to inactivate the Bst enzyme. qPCR was conducted using SYBR green MIX (Roche) according to manufacturer's instructions and the same forward and reverse primers used for the subsequent index PCR step in order to calculate the total amount of DNA library in each sample and assess the optimal number of PCR cycles required for DNA library amplification at the subsequent step. After that, the 12µl DNA library was index-amplified in a 50 µl PCR reaction by mixing with 25 µl 2X Kapa U+, 1 µl of each primer (10 µM, inPE forward primer + indexed reverse primer) and 11 µl H<sub>2</sub>O. The PCR thermocycling conditions were 45s at 98°C, followed by number of cycles (based on qPCR values) of 15s at 98°C, 30s at 65°C and 30s at 72°C, and a final 60s elongation step at 72°C. The amplified DNA library was purified with PB buffer using Qiagen MinElute columns and eluted in 50 µl EB buffer. Negative library controls, based on EB as well as negative extraction controls were included for each batch. To quantify the amount of the purified DNA libraries, Agilent Bioanalyzer 2100 was used. The library pools were sequenced (80 bp single read) on Illumina HiSeq 2500 machines at the Danish National High-throughput DNA Sequencing Centre. The base-calling and sequence sorting by sample-specific indices were produced by the Sequencing Centre using CASAVA v1.8.2.

## Sample selection

A total of 528 ancient human remains were processed and screened (c. 15 million sequences per sample) for contamination levels and endogenous human DNA content. After removing contaminated and poorly preserved samples the number reduced to 442. Many of the remaining samples were prioritized based on their endogenous human DNA content and relevance to the project and were sequenced deeper resulting in 376 samples between 0.1 and 11.7X coverage, of which 216 were above

64 1X. A total of 64,786,513,002 DNA reads from 442 different samples were generated for this study,  
65 out of which 23,149,730,287 uniquely mapped to the human reference genome (Supplementary Table  
66 2).  
67

### **Supplementary Note 3 - Data quality assessment, contamination, error profiles and sex determination**

AdapterRemoval v2.1.3<sup>162</sup> was used for removing Illumina adapter sequences and stretches of Ns at both ends of the ancient DNA reads, keeping only sequences with a minimum length of 30 bp. We mapped the adapter-free sequences against the human reference genome build 37 using BWA v0.7.10 aligner<sup>163</sup> with the seed (-l parameter) disabled for higher sensitivity of ancient DNA reads<sup>164</sup>. DNA sequences were processed with samtools v1.3.1<sup>163</sup> and only aligned sequences with mapping quality of at least 30 were kept. Picard v1.127 (<http://broadinstitute.github.io/picard>) was used to sort the reads and remove duplicates. DNA libraries were combined at sample level and realigned using GATK v3.3.0<sup>165</sup> with Mills and 1000G gold standard indels. At the end, realigned bam files had the md-tag updated and extended BAQs calculated using samtools calmd. Read depth and coverage were determined using pysam (<http://code.google.com/p/pysam/>) and BEDtools<sup>166</sup>. The mapping statistics for the ancient samples are summarized in Supplementary Table 2.

DNA damage is one of the most characteristic features of ancient DNA molecules and is usually manifested in the form of single or double stranded breaks resulting in fragmented DNA molecules (usually <100 bp) and single-stranded overhangs, as well as cytosine deamination towards the 5' end of DNA fragments leading to the typical C→T transitions in the sequenced DNA reads.

We have used mapDamage v2.0 to obtain approximate bayesian estimates of damage parameters<sup>167</sup>. Three main parameters were assessed: (i) the C→T transitions rates at the first position of the 5' end of DNA reads, (ii)  $\lambda$ , the proportion of nucleotides in single-stranded overhang regions, and (iii)  $\delta_s$ , which shows the estimated C→T transition rate for the single-stranded overhang segments.

Of the 442 ancient samples, the C → T transition rates at the first position of the 5' end of the DNA fragments ranged from 1.5% to 42.4% when comparing with the human reference genome (Figure S3.1). Both the lambda ( $\lambda$ ) and DeltaS ( $\delta_s$ ) parameters show a significant deviation from zero, indicating that the bulk of the recovered DNA molecules were damaged and degraded which suggested that the majority of DNA molecules were of ancient origin.

The DNA damage parameters of each ancient sample from this study is presented in Supplementary Table 4.



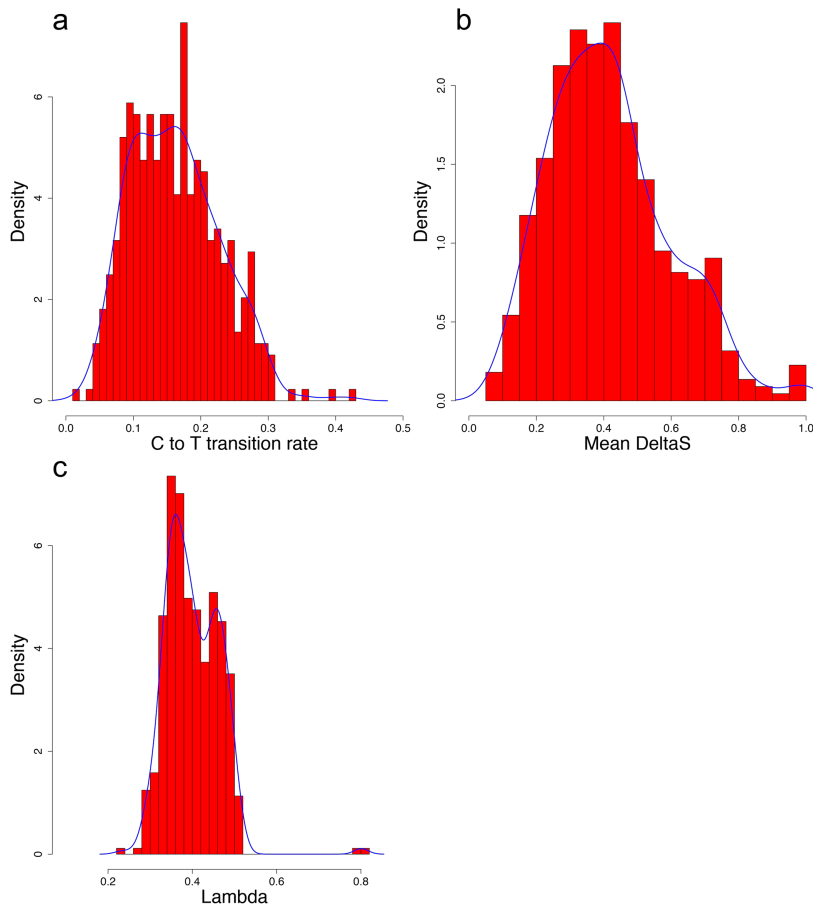

**Fig. S3.1:** Distribution of the ancient samples according to the DNA damage levels. (a) C→T transition rates; (b) transition rates in single-stranded overhangs; (c) fraction of bases in single stranded overhangs.

## Contamination

**ContamMix:** This method relies on the reconstructed consensus mtDNA sequences of ancient samples; thus, the contamination should not exceed 50% for this method to work. The details of ContamMix is described elsewhere<sup>168</sup>. It also assumes that the sequenced mtDNA reads originate from a mixture of the reconstructed consensus sequence and 311 whole mitochondrial genomes, representing possible contaminant sequences from present-day worldwide populations. By comparing the mapping affinity of each ancient mtDNA read to the reconstructed consensus sequence and to the 311 possible contaminants, ContamMix reports the total fraction of non-endogenous reads

115 as the contamination rate with a Bayesian estimate of the posterior probability of the contamination  
 116 proportion.

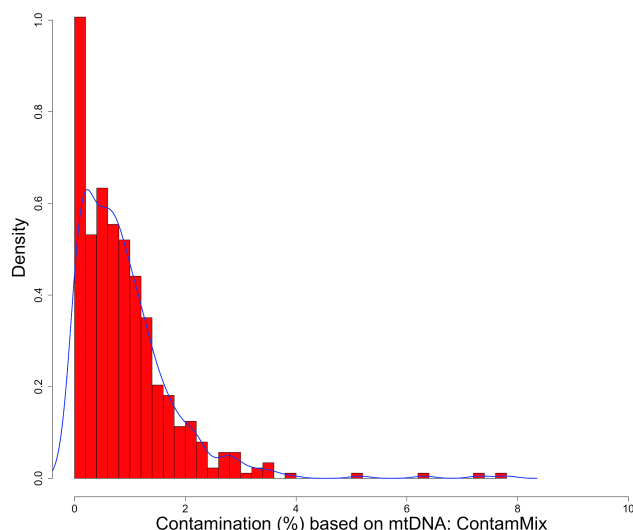

117  
 118 **Fig. S3.2:** Distribution of the ancient samples according to the contamination levels. All ancient  
 119 samples have >9X sequencing depth (n=442) on mtDNA. The four samples with more than 5%  
 120 contamination on the plot did not show significant contamination based on Schmutzi, therefore were  
 121 kept for downstream analysis.

122  
 123 For this approach, we aligned all trimmed reads from ancient samples to the human mitochondrial  
 124 reference genome: revised Cambridge Reference Genome (rCRS) with the same parameters as for  
 125 the whole genome mapping. The sequencing depth of coverage for the mtDNA ranged 9-538X, the  
 126 details are provided in the Supplementary Table 2. To construct the endogenous mtDNA sequence of  
 127 ancient samples required for ContamMix we have used an in-house perl script. mtDNA sites with  
 128 base quality <20 and reads with mapping quality <30 were discarded. Only SNPs and sites with at  
 129 least 3X coverage were considered for consensus calling. At each mtDNA position a base was called  
 130 only if it was observed in at least 70% of the reads covering that site. The distribution of the ancient  
 131 samples based on contamination levels assessed by ContamMix are shown in Figure S3.2. The  
 132 contamination estimates are presented in Supplementary Table 4.

133  
 134 **Schmutzi:** The amount of present-day human contamination was also estimated in each sample with  
 135 Schmutzi<sup>169</sup>. This estimate was performed without the inclusion of the predicted contaminant in the  
 136 database of putative present-day human contaminant mitogenomes used by Schmutzi (option "--  
 137 notusepredC"). Unlike ContamMix, it does not estimate a parameter for error but instead uses input

138 mis-incorporation rates due to deamination and uses base quality scores. Schmutzi also assumes a  
139 single contaminant source unlike ContamMix.

140 Both methods were applied to our dataset and only samples with contamination levels greater than  
141 5% detected with both methods were removed.

142 Schmutzi was also used to infer the endogenous consensus sequences by mitigating the impact of  
143 deamination-induced nucleotide mis-incorporations and the presence of present-day human  
144 contamination. The former is achieved by incorporating the rates of mis-incorporations into a  
145 Bayesian model that considers every possible 4 base for the endogenous and the contaminant. Each  
146 aDNA fragment is assigned a probability of being endogenous given the contamination prior provided  
147 above. This probability is computed using the distribution of fragment lengths and the rate of base  
148 mis-incorporations due to deamination. The most likely base is produced along with a per-base error  
149 probability on a PHRED scale.

150

151 **Male X-chromosome based contamination analysis:** Since male individuals carry only 1 X  
152 chromosome inherited from the mother, any heterozygous position of that chromosome (outside the  
153 pseudoautosomal regions) would be either due to sequencing errors or contamination. In case of  
154 sequencing errors, the heterozygous positions are expected to be randomly distributed across the  
155 chromosome, while in case of contamination heterozygous positions should be restricted to mainly  
156 diagnostic positions (sites on the X chromosome that are known to be polymorphic). The difference  
157 of mismatch rates between these positions and adjacent sites indicates the contamination levels. This  
158 method is described in more detail in previous work<sup>170</sup> using the package ANGSD<sup>171</sup>. For this  
159 analysis, we removed the pseudoautosomal regions of the X chromosome and used mapping quality  
160  $\geq 30$  and base quality  $\geq 20$  filters. The reported values are based on the maximum likelihood estimator  
161 using the unbiased sampling-based approach, i.e. “Method1” in ANGSD (Figure S3.3).

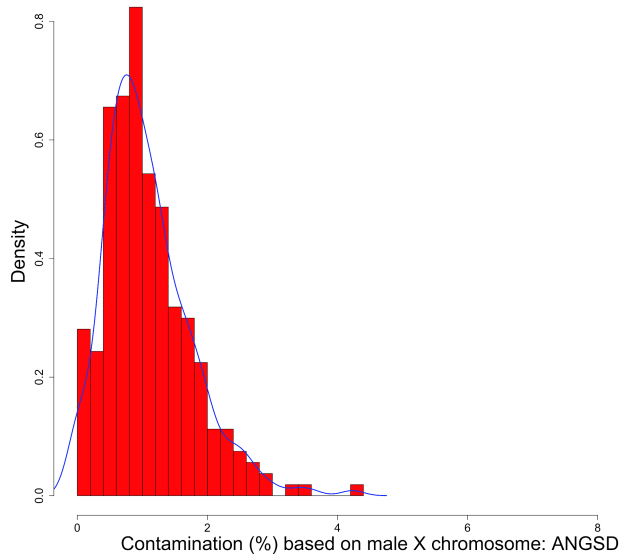

**Fig. S3.3:** Distribution of the ancient samples according to the X-chromosome based contamination levels. Only male individuals with  $>0.1X$  average genomic depth of coverage were used for the analysis ( $n=267$ ).

### Sex determination

The sex of ancient individuals was determined by calculating the  $R_Y$  parameter, which reflects the ratio of the fraction of Y chromosome reads to the fraction mapped to both X and Y chromosomes<sup>172</sup>. According to this method, individuals with  $R_Y$  values above 0.077 are considered as male, while the ones lower than 0.016 as female.

We assessed the sex of all the ancient samples in this study, regardless of the sequencing depth. We identified 141 females and 296 males (Supplementary Table 5) while the biological sex for the rest of the 5 samples were not identified (4 of which due to low coverage). This strong male bias was expected, since in many of the famous sites such as Dorset-UK (executed c. 50 males) and Salme-Estonia (2 ship burials of male warriors), only male individuals were buried. Moreover, whenever feasible (with all other factors being equal - e.g. age of the sample or preservation), males were prioritised due to the extra genetic information carried in the Y-chromosome. Interestingly, one of the ancient samples with unidentified biological sex (VK204) had c.  $1X$  average genomic coverage. The inability of this method to identify the sex of this individual may indicate that this person was affected by some form of Klinefelter syndrome and had one of the non-usual karyotypes (e.g. XXY or XXXY). Given the relatively high rate of occurrence of this syndrome with roughly 1 in 576 males<sup>173</sup>, it is not unlikely to observe one case in such large number of ancient samples.

184 **Mitochondrial DNA analysis**

185 For mtDNA haplogroup assignment we used the mtDNA consensus sequences created by Schmutzi.  
186 The mitochondrial haplogroups of the ancient Viking Age individuals were assigned using  
187 haplogrep<sup>174</sup>.

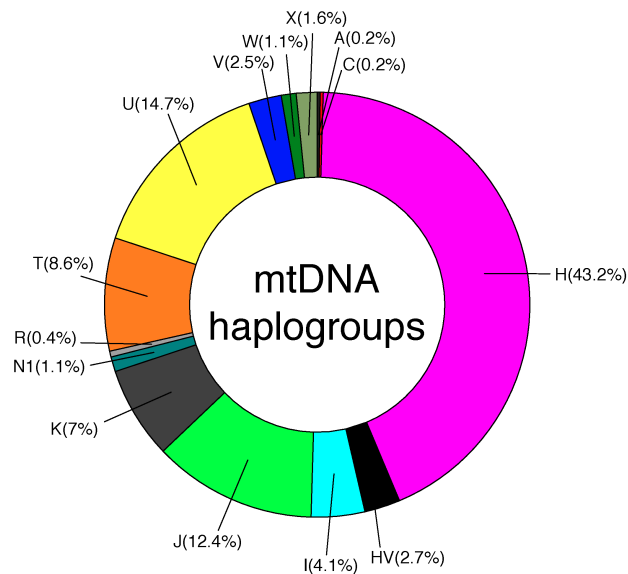

188  
189 **Fig. S3.4:** The distribution of mtDNA haplogroups across the 442 ancient samples from this study.  
190 The haplogroup frequencies should be interpreted with caution since there are a few related  
191 individuals in this study especially from Faroe Islands and Salme boat burials (see the genetic  
192 relatedness section) which were not removed for the frequency estimation of the whole dataset.

193  
194  
195 The overall distribution of the mtDNA haplogroups of the ancient Viking age samples (Figure S3.4)  
196 is quite similar to the diversity of mtDNA lineages found in modern northern European populations.  
197 Namely, the frequently encountered (>5%) major mtDNA haplogroup were Hg H (43%), followed  
198 by Hgs U, J, T and K  
199 ([http://www.eupedia.com/europe/european\\_mtdna\\_haplogroups\\_frequency.shtml](http://www.eupedia.com/europe/european_mtdna_haplogroups_frequency.shtml)).

200 Interestingly, we found two individuals VK548 (a female individual from Norway; Nord-Trondelag  
201 3705) and VK160 (a male individual from Russia; Kurevanikka\_7283-3) who had mtDNA  
202 haplogroups commonly found in Asian populations: haplogroups A12a and C4a1a, respectively. The  
203 VK548 sample was previously suggested to have had the haplogroup A4b based on mtDNA HVR1  
204 data<sup>57</sup>.

205 The haplogroup frequencies in Figure S3.5 should be interpreted with caution since there are few  
 206 related individuals in this study especially from Faroe Islands and Salme boat burials (see  
 207 Supplementary Note 4) which were not removed for the frequency estimation of the whole dataset.  
 208 The aligned whole mtDNA sequences of Viking age samples (roughly dating 1000 year ago) were  
 209 used as an input for BEAST v1.8.4<sup>175</sup> to uncover the trajectory of the effective female population size  
 210 ( $N_e$ ) through time using the Bayesian skyline plot (BSP) method.  
 211 The MCMC chains were run for 10E8 states and sampled every 10E4 states with the first 10E6 states  
 212 discarded as burn-in. We used the CIPRES open-access server for phylogenetics studies<sup>176</sup> to run the  
 213 BEAST analysis. We checked the output data for convergence to a stationary distribution and  
 214 sufficient effective sample size estimates using Tracer v1.7<sup>177</sup>. We used the GTR model with gamma  
 215 plus invariant sites and a strict clock with a normal prior of 2.2E-8/site/year as the mean value with  
 216 standard deviation of 2.2E-9. The resulting trees were annotated with TreeAnnotator 1.8.4 (BEAST  
 217 package) and visualised by FigTree (<http://tree.bio.ed.ac.uk/software/figtree/>).

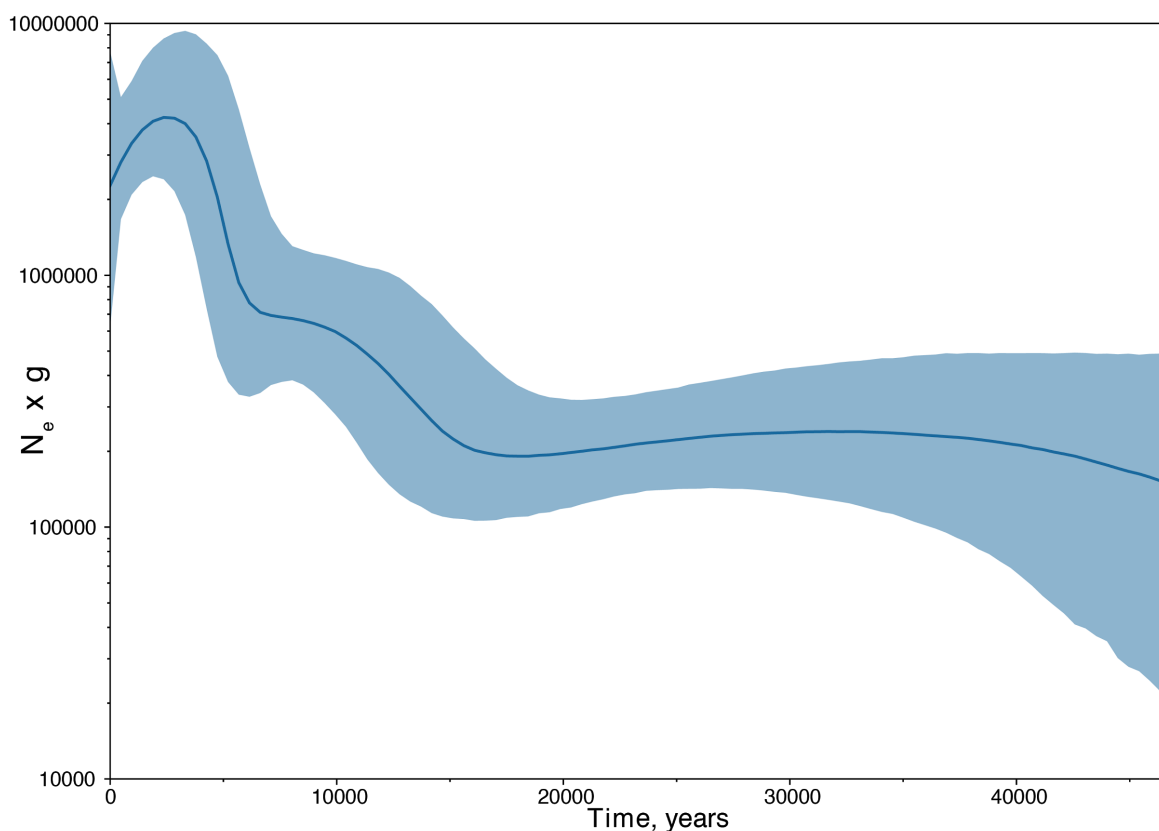

218  
 219 **Figure S3.5:** Bayesian skyline plot based on the ancient samples. Values on the y axis represent the  
 220 effective female population size ( $N_e$ ) x generation time ( $g$ ).  
 221







also observed for less frequent haplogroups in our ancient dataset, such as G (n=3), J (n=3) and T (n=2),, indicating a possible non-Scandinavian male genetic component in the Viking Age Northern Europe. Interestingly, individuals carrying these haplogroups were from the later Viking Age (10<sup>th</sup> century and younger), which might indicate some male gene influx into the Viking population during the Viking period. Worth mentioning, that due to the small sample size of the rare haplogroups, these differences might be of stochastic nature therefore the results based on uniparental markers should be interpreted with caution.

**pathPhynder Analysis:** The highly degraded nature of aDNA data poses considerable challenges for combining ancient and modern samples for phylogenetic analyses. Typical analyses of ancient Y-chromosome data focus on a curated set of known markers (ISOGG), however, many more markers exist and will continuously be generated as more sequencing studies emerge. By making use of this additional Y-chromosome variation, we can increase the probability of overlap of ancient DNA reads with branch-defining markers and use this information to place ancient samples into more detailed phylogenies.

Using the pathPhynder workflow (<https://github.com/ruidlpm/pathPhynder>), we first assigned 56,246 variants from the 1000 Genomes Project to the branches of the Y-chromosome tree<sup>181</sup>. Next, for each aDNA sample, we generated a pileup at these informative sites, excluding C/T and G/A sites covered by a single read to minimise the impact of post-mortem deamination ('conservative' mode). Next, for each ancient sample, we determined the number of ancestral and derived alleles at each branch and traversed the 1000 Genomes Y-chromosome tree, using this information to map ancient samples to their most likely place in the phylogeny (Figure S3.8).

In the 1000 Genomes Project Y-chromosome phylogeny, haplogroup N is split into two main clades, one composed of mostly East Asian individuals (CHB) and one of Finnish individuals (FIN). The Viking and Early Viking samples from Estonia and Sweden are positioned within the FIN clade, more specifically at the branch defined by the marker VL29/CTS2929-N1a1a1a1a1a or at branches downstream of it. A large study of Y-chromosomes revealed that the VL29 lineage occurs at highest frequencies in present-day Estonians, Latvians, Lithuanians, Finns and other northern European populations<sup>182</sup>.

Haplogroup I1, previously described as showing the signature of a star-like expansion (Poznik 2016), occurs in present-day Scandinavians at a frequency of 25–35%<sup>183</sup>. In the 1000 Genomes Project, this

287 clade is mostly composed by FIN, GBR and CEU populations. I1 is the most well represented  
 288 haplogroup in our ancient dataset, and most regions contained individuals belonging to this lineage  
 289 (especially Estonia, Russia, Denmark and Greenland), with the exception of the Isle of Man, Ireland  
 290 and Italy, however these regions have comparatively small sample sizes which may not allow the  
 291 detection of this haplogroup. The ancient samples of the present-study are mainly distributed in two  
 292 main clades, I1a1b1-L22, which accounts for 71% of the I1 haplotypes in a Y-chromosome survey  
 293 of Finland<sup>184</sup>, and I1a2a-S246. Of particular interest, the clade I1a2a1a1d1a-S247 is especially well  
 294 represented in Estonian samples, and is found mostly in present-day Finnish and Northern  
 295 Scandinavian groups.

296 While it likely that many I1 lineages dispersed into the British Isles from Scandinavia during the  
 297 Viking period, it is also probable that earlier Anglo-Saxon migrations also played a role, as suggested  
 298 by the East to West decreasing frequency cline of I lineages<sup>185</sup> and the presence of the I1 lineage in  
 299 an individual from this period excavated in England<sup>186</sup>).

300 Within haplogroup I2, two Viking samples from Sweden and Ukraine, fall within the L621-I2a1a2b  
 301 and its downstream I2a1a2b1-CTS10936 clade, together with a FIN individual. This lineage has a  
 302 mostly Eastern European distribution<sup>187</sup>, occurring more frequently in Slavic peoples. Other I2  
 303 ancient samples fall within the clade defined by I2a1b1-M223, with highest frequencies in Germanic  
 304 and Scandinavian peoples<sup>183</sup>. A subset of these individuals from Sweden, Orkney and England was  
 305 positioned in the I2a1b1a2b-Z161 branch, a lineage present in North Europe, especially in Denmark,  
 306 Germany, the Netherlands, and England.

307 In terms of haplogroup R, only a single R2-M9710 individual was found in Iceland (VK123), and  
 308 was positioned together with mostly South Asian populations of the 1000 Genomes project, while all  
 309 other ancient samples belong to R1 subclades.

310 Within Europe, the subclades of R1, R1a-M420 and R1b-M343, reach higher frequencies in the East  
 311 and West, respectively. In broad terms, the distribution of R1 lineages in our ancient dataset is  
 312 consistent with this, with the Isle of Man and Italy carrying exclusively R1b derived lineages, and  
 313 Ukraine and Estonia R1a derived lineages.

314 Focusing on R1a, two major lineages exist, one more common in Central and South Asian populations  
 315 (R1a1a1b2-Z93), and the other in Europe (R1a1a1b1a-Z282)<sup>188</sup> (Underhill 2015). As expected, the  
 316 R1a derived ancient samples here analysed fall within the European Z282 clade, and are positioned  
 317 near Great British (GBR), European (CEU) and Finnish (FIN) individuals in the Y chromosome tree,  
 318 rather than with the South Asian individuals in the Z93 clade. Many of the ancient Norwegian and

319 Swedish samples were determined to be derived for the R1a1a1b1a3a-S221/Z284 marker, of nearly  
 320 exclusive distribution within Scandinavian populations and occurring at approximately 20% in  
 321 Norway<sup>188</sup>.  
 322 In terms of R1b lineages, the R1b1a1b1b-Z2105 and R1b1a1b1a-L11 clades have distinct  
 323 distributions, with the first being typically associated with the Yamnaya<sup>160,189,190</sup> and distributed today  
 324 around the Caucasus and Volga-Uralic regions<sup>187</sup>, and the latter, more commonly found in Late  
 325 Neolithic, Bronze Age and later periods in Central and Western Europe. A derived status at  
 326 R1b1a1b1b-Z2105 was found in a single sample from Italy (VK535). The vast majority of other R1b  
 327 samples belonged instead to the R1b1a1b1a-L11 clade, and were mostly distributed within its two  
 328 main subclades: P312/S116-R1b1a1b1a1a2 and U106/M405-R1b1a1b1a1a1<sup>191</sup>, of western and  
 329 eastern distribution relative to the Rhine river basin<sup>192</sup>.

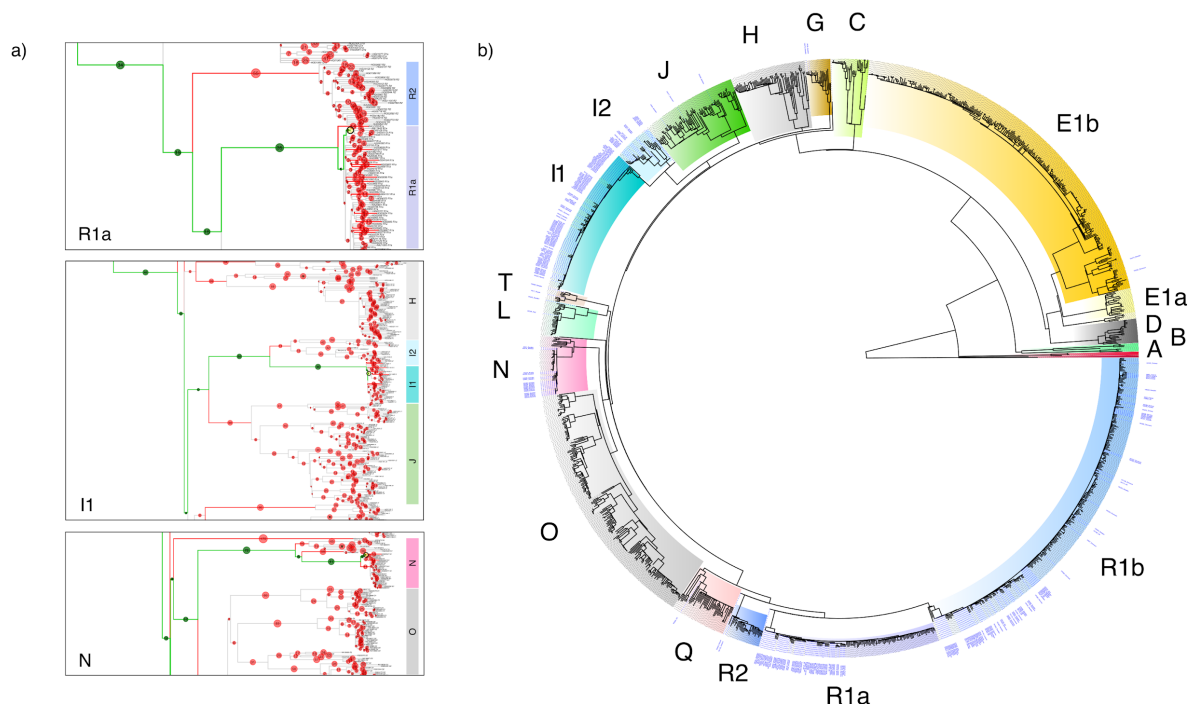

332 **Fig. S3.8:** Placing ancient DNA samples within the 1000 Genomes Y-chromosome tree: a) Examples  
 333 of the identification of the best path within the Y-chromosome tree for 3 representative ancient  
 334 samples. The phylogeny is traversed and the number of derived (green circles) and ancestral (red  
 335 circles) markers present in a given ancient sample are evaluated in order to identify the best path  
 336 (green branches) and position (yellow circle) where this individual can be placed. b) 1000 Genomes  
 337 Y-chromosome phylogeny with 284 ancient samples (labelled in blue) added to the most likely place  
 338 of the tree according to the number of derived and ancestral markers carried at each branch.

## **Supplementary Note 4 - Kinship analysis**

### **Introduction**

Since many of the ancient samples were sampled from the same archaeological sites, it seemed possible that there would be some level of genetic relatedness between certain pairs of individuals across our dataset. To assess to what extent this was the case we used two different methods implemented in two programs NgsRelate<sup>193</sup> and READ<sup>194</sup> that have previously shown to be relatively robust for low coverage NGS data. In particular, we used NgsRelate to detect family relationship between all pairs of samples and double checked all detected first and second degree relationships with READ.

### **Methods**

**READ (Relationship Estimation from Ancient DNA):** Since the genetic relatedness analysis can be difficult with low coverage data, we have used the program READ (in addition to the NgsRelate, see below section) which was shown to successfully work with ancient NGS data as low as 0.1X sequencing depth for determining up to second degree relationships<sup>194</sup>. This method estimates the proportion of non-matching alleles for each pair of individuals and uses the same statistic from unrelated individuals for normalization purposes. Based on the normalised proportions of shared alleles the degree of genetic relatedness between pairs of individuals is assigned as first degree (parent-offspring or siblings), second degree (half-siblings or nephew/niece – uncle/aunt or grandparent-grandchild), unrelated or identical. All the sites in the vcf files were assumed as homozygous (by only taking the majority allele for each polymorphic site) and low frequency alleles (<1%) were removed from the resulting plink files with `-maf 0.01`.

**NgsRelate:** We also used the program NgsRelate to infer relatedness<sup>193</sup>. NGSrelate is a maximum-likelihood based program that for a pair of individuals estimates the three coefficients,  $k_0$ ,  $k_1$  and  $k_2$ , from genotype likelihoods (GLs) instead of called genotypes and through the GLs it takes into account the uncertainty of the true genotypes, which is inherent to low-depth data. The coefficients,  $k_0$ ,  $k_1$  and  $k_2$ , denote the proportions of the genome where the pair of analyzed individuals share 0, 1 and 2 alleles identical by descent, respectively. Importantly, they can be used to infer relatedness, e.g. the expected values for a full sibling pair is  $k_0=0.25$ ,  $k_1=0.5$  and  $k_2=0.25$ , and in general, the more related a pair of individuals is the lower  $k_0$  is expected to be.

371 Since it has not been shown that NgsRelate works for sequencing data of ultra low depth, we only  
372 included the 376 samples with sequencing depth above 0.1X in the analyses. From these we estimated  
373 GLs and allele frequencies with ANGSD<sup>171</sup> using the SAMtools GL model (-gl 1). For this we only  
374 used reads with MapQ<30 and bases with baseQ<20 and excluded sites where the minor allele  
375 frequency across the analysed samples was below 0.05. To minimize potential issues caused by high  
376 error rates caused by the samples being ancient, we only estimated GLs and allele frequencies for the  
377 autosomal sites where 1000 Genomes CEU population has a minor allele frequency of 0.05 and are  
378 not transitions, and we used the minor and major alleles from this CEU population as input to ANGSD  
379 (-doMajorMinor 3). Across all samples this resulted in a dataset, GLs and allele frequencies, from  
380 1,752,719 sites.

381 We applied NgsRelate to the dataset and used accelerated EM algorithm to obtain maximum  
382 likelihood estimates (-m 1). As a stopping criterion for the EM algorithm, we used a log-likelihood  
383 difference of less than  $10^{-6}$  between two consecutive EM-steps (-t 1e-06), and set the maximum  
384 number of steps to 10000 (-i 10000). To be able to assess whether the EM algorithm converged, we  
385 ran ten NgsRelate analyses with different starting seeds. For each pair of samples in the dataset, we  
386 used the estimates from the analysis run with the highest likelihood and for all pairs the likelihood  
387 difference among the top 5 runs were less than 0.15, suggesting that convergence was reached.

388 **PRIMUS:** The pedigree reconstructions based on the kinship coefficients were conducted using  
389 PRIMUS - Pedigree Reconstruction and Identification of a Maximum Unrelated Set<sup>195</sup>.

390

## 391 **Results**

392 The results of kinship analysis of all pairs based on the NgsRelate analysis are depicted in Figure  
393 S4.1 and the estimated relatedness coefficients for pairs estimated to have  $k_0 < 0.875$  are listed in Table  
394 S4.1. The results for first and second degree relationships obtained by READ were identical with that  
395 of NgsRelate.

396

### Pairwise relatedness estimates for samples with >0.1X data

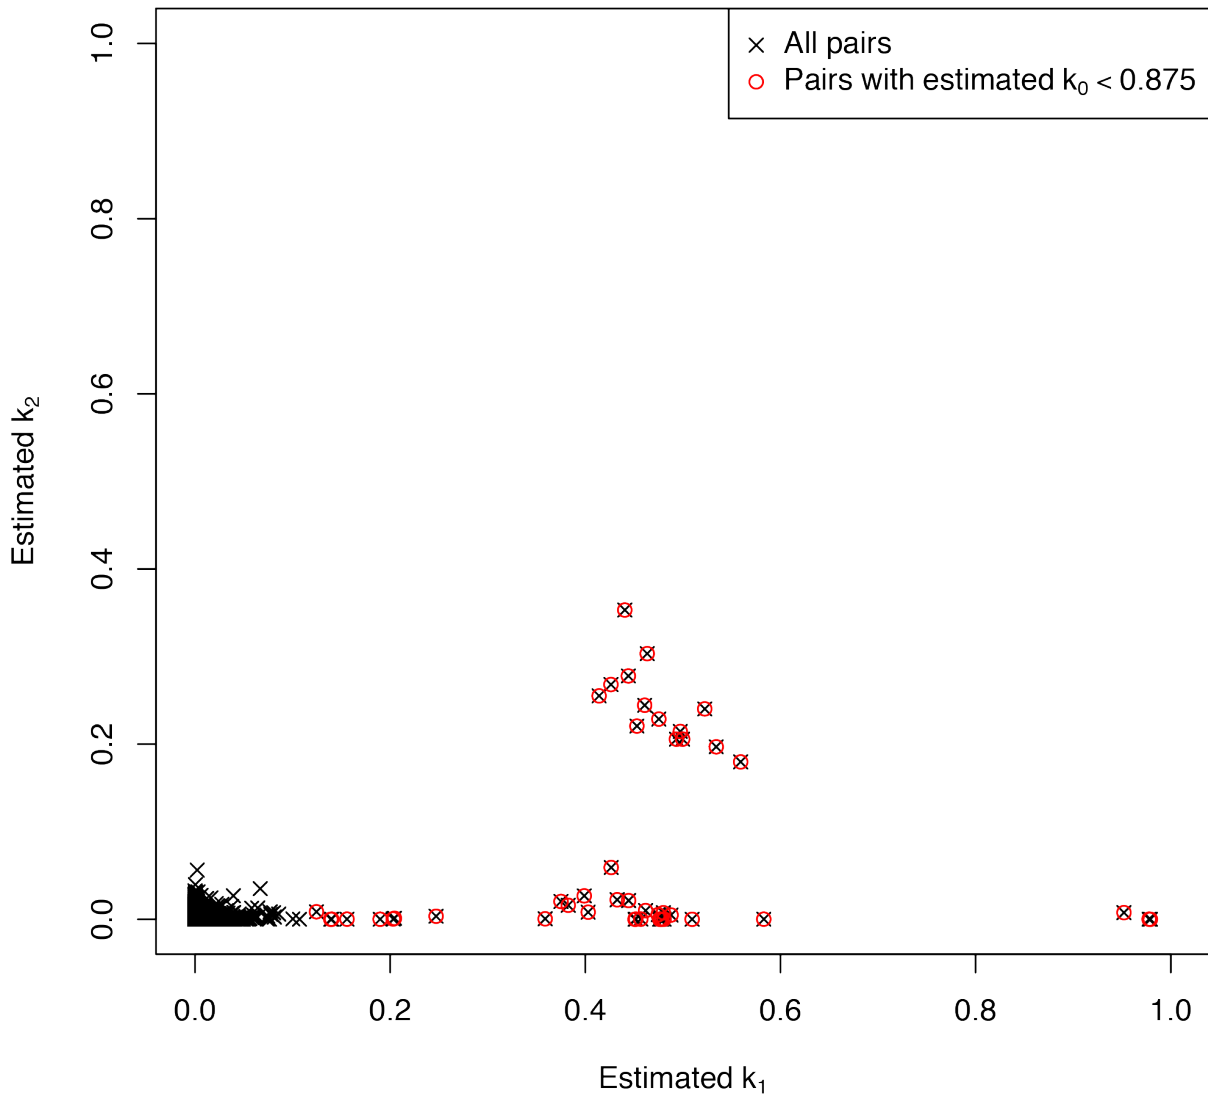

**Fig. S4.1:** Estimated relatedness coefficients for all pairs of samples with more than 0.1X data. The estimates for each pair is shown with black crosses and the ones with estimated  $k_0$  below 0.875 are marked with a red circle.

These results suggest that a large number of individuals are closely related in our ancient dataset, in particular the individuals from the Faroe Islands, Iceland and Salme ship burial.

408 **Table S4.1:** Estimated relatedness coefficients for pairs of ancient individuals with more than 0.1X  
409 data with  $k_0$  below 0.875.

410

| IDs      |          | Origin        |               | Relatedness estimates |       |       |       |
|----------|----------|---------------|---------------|-----------------------|-------|-------|-------|
| Sample 1 | Sample 2 | Sample 1      | Sample 2      | # of sites            | $k_0$ | $k_1$ | $k_2$ |
| VK46     | VK245    | Faroe Islands | Faroe Islands | 1144972               | 0.491 | 0.509 | 0.000 |
| VK46     | VK45     | Faroe Islands | Faroe Islands | 189451                | 0.574 | 0.399 | 0.027 |
| VK154    | VK156    | Poland        | Poland        | 1023563               | 0.522 | 0.478 | 0.000 |
| VK230    | VK110    | Iceland       | Iceland       | 1331502               | 0.306 | 0.426 | 0.268 |
| VK230    | VK111    | Iceland       | Iceland       | 1036610               | 0.021 | 0.979 | 0.000 |
| VK279    | VK144    | Denmark_Fyn   | Oxford        | 250669                | 0.528 | 0.462 | 0.010 |
| VK25     | VK236    | Faroe Islands | Faroe Islands | 1136739               | 0.296 | 0.475 | 0.229 |
| VK25     | VK238    | Faroe Islands | Faroe Islands | 1117599               | 0.641 | 0.359 | 0.001 |
| VK25     | VK234    | Faroe Islands | Faroe Islands | 791012                | 0.301 | 0.493 | 0.206 |
| VK25     | VK242    | Faroe Islands | Faroe Islands | 702498                | 0.507 | 0.488 | 0.005 |
| VK25     | VK44     | Faroe Islands | Faroe Islands | 567811                | 0.513 | 0.480 | 0.007 |
| VK179    | VK183    | Greenland     | Greenland     | 640061                | 0.860 | 0.140 | 0.000 |
| VK110    | VK111    | Iceland       | Iceland       | 962379                | 0.022 | 0.978 | 0.000 |
| VK483    | VK497    | Salme         | Salme         | 1130328               | 0.206 | 0.440 | 0.353 |
| VK483    | VK490    | Salme         | Salme         | 942642                | 0.288 | 0.497 | 0.214 |
| VK483    | VK485    | Salme         | Salme         | 795096                | 0.261 | 0.559 | 0.180 |
| VK237    | VK244    | Faroe Islands | Faroe Islands | 645056                | 0.867 | 0.124 | 0.009 |
| VK539    | VK540    | Shestovitsa   | Shestovitsa   | 853398                | 0.331 | 0.414 | 0.255 |
| VK497    | VK490    | Salme         | Salme         | 876836                | 0.295 | 0.500 | 0.206 |
| VK497    | VK485    | Salme         | Salme         | 739597                | 0.327 | 0.453 | 0.221 |
| VK236    | VK238    | Faroe Islands | Faroe Islands | 1034784               | 0.549 | 0.451 | 0.000 |
| VK236    | VK234    | Faroe Islands | Faroe Islands | 734873                | 0.269 | 0.534 | 0.197 |
| VK236    | VK242    | Faroe Islands | Faroe Islands | 655170                | 0.602 | 0.382 | 0.016 |
| VK236    | VK44     | Faroe Islands | Faroe Islands | 529445                | 0.543 | 0.457 | 0.000 |
| VK342    | VK527    | Öand          | Uppsala       | 909447                | 0.861 | 0.139 | 0.000 |
| VK342    | VK354    | Öland         | Öland         | 682763                | 0.548 | 0.452 | 0.000 |

|              |       |               |               |        |       |       |       |
|--------------|-------|---------------|---------------|--------|-------|-------|-------|
| <b>VK238</b> | VK234 | Faroe Islands | Faroe Islands | 718915 | 0.545 | 0.433 | 0.022 |
| <b>VK238</b> | VK242 | Faroe Islands | Faroe Islands | 640593 | 0.524 | 0.476 | 0.000 |
| <b>VK238</b> | VK44  | Faroe Islands | Faroe Islands | 515690 | 0.519 | 0.481 | 0.000 |
| <b>VK406</b> | VK33  | Skara         | Skara         | 805059 | 0.040 | 0.952 | 0.008 |
| <b>VK168</b> | VK167 | Oxford        | Oxford        | 746748 | 0.520 | 0.475 | 0.005 |
| <b>VK527</b> | VK517 | Uppsala       | Uppsala       | 816579 | 0.233 | 0.463 | 0.303 |
| <b>VK555</b> | VK490 | Salme         | Salme         | 770828 | 0.844 | 0.156 | 0.000 |
| <b>VK245</b> | VK240 | Faroe Islands | Faroe Islands | 636199 | 0.534 | 0.444 | 0.021 |
| <b>VK245</b> | VK45  | Faroe Islands | Faroe Islands | 132706 | 0.278 | 0.444 | 0.278 |
| <b>VK157</b> | VK155 | Poland        | Poland        | 248596 | 0.237 | 0.522 | 0.240 |
| <b>VK490</b> | VK485 | Salme         | Salme         | 619501 | 0.295 | 0.461 | 0.244 |
| <b>VK187</b> | VK183 | Greenland     | Greenland     | 460045 | 0.797 | 0.203 | 0.000 |
| <b>VK241</b> | VK244 | Faroe Islands | Faroe Islands | 436861 | 0.749 | 0.247 | 0.003 |
| <b>VK240</b> | VK45  | Faroe Islands | Faroe Islands | 107208 | 0.514 | 0.426 | 0.059 |
| <b>VK234</b> | VK242 | Faroe Islands | Faroe Islands | 454640 | 0.605 | 0.375 | 0.020 |
| <b>VK234</b> | VK44  | Faroe Islands | Faroe Islands | 367567 | 0.523 | 0.476 | 0.000 |
| <b>VK19</b>  | VK408 | Ladoga        | Ladoga        | 141229 | 0.417 | 0.583 | 0.000 |
| <b>VK242</b> | VK44  | Faroe Islands | Faroe Islands | 329339 | 0.589 | 0.403 | 0.008 |

411

412

413 In the Salme ship burial 4 male siblings (VK483, VK485, VK490, VK497), i.e. brothers were  
414 discovered (Figure S4.2a), which was additionally supported by the identical mtDNA and Y  
415 chromosome profiles (Supplementary Table 5). It is worth mentioning here that the slight differences  
416 in Y chromosomal haplogroup assignments in this case are likely due to the presence of ancient DNA  
417 damaged sites or insufficient genomic coverage. As one would expect, the four brothers were buried  
418 relatively close to each other in the same layer of the Salme II ship burial. In Iceland, we identified a  
419 female individual (VK111) with her two children (one male VK110 and one female VK230, Figure  
420 S4.2b).

421



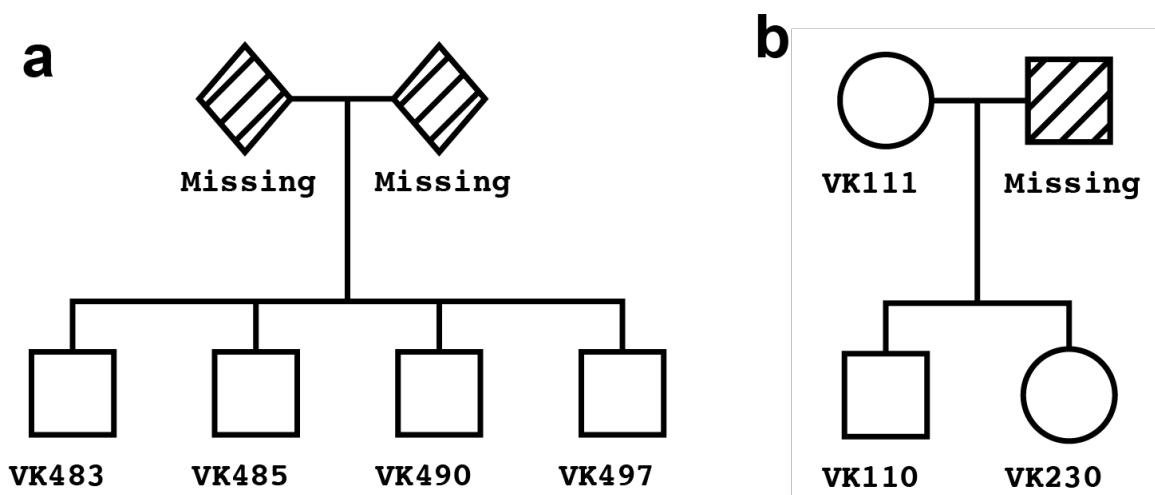

**Fig. S4.2:** Genealogy networks for individuals from Salme (a) and Iceland (b).

The largest number of related individuals were identified in Faroe Islands. Three family groups were identified in the Church burial in Faroe Islands, however, only two groups are analysed here due to the relative closeness of family members within the two groups. Even though we could not see significant degree of relationship between the groups, we cannot exclude the genetic ties between these groups due to missing individuals in our dataset.

Family-1 included 5 infants grave22 (VK238), grave31 (VK242), grave23 (VK234), grave27 (VK236) and grave28 (VK25). The possible four pedigree networks are shown in Extended Data Fig. 8.

The second family included 4 related individuals from the Faroe Islands (Extended Data Fig. 8). The most “parsimonious” network likely reflects the true genetic relationship between the individuals also considering the grave locations in the churchyard, i.e. two infants in graves 13 (VK45) and 15 (VK245) buried close to their (likely) grandparents in graves 7 (VK240) and 14 (VK46).

Among the results from the genetic relatedness analysis it is worth mentioning two exciting cases that were unexpected. We have identified a 2<sup>nd</sup> degree related pair of male individuals (i.e. half-brothers, nephew-uncle or grandson-grandfather) from across the North Sea, one sample (VK279) excavated in Denmark (site Galgedil on Fyn) while his half-brother (VK144) in UK (site Oxford). Similarly, another pair of individuals that are estimated to be third or fourth degree relatives was found in Sweden, one of them excavated on the island of Öland (VK342) while the other one was from Uppsala (VK527).

## **Supplementary Note 5 - Imputation**

Genotype imputations were conducted for 298 ancient samples (289 from this study + 9 from the study by Krzewińska et al.<sup>196</sup>) that had a sequencing depth greater than 0.5X. Since these ancient samples were sequenced at low depth of coverage, we used Beagle v4.1<sup>197</sup> for imputations based on the genotype likelihood data, which was first estimated by GATK v3.7.0 UnifiedGenotyper. To generate the genotype data we only called biallelic sites present in the 1000G dataset and only the observed alleles (--genotyping\_mode GENOTYPE\_GIVEN\_ALLELES). The resulting VCF files were filtered by setting genotype likelihoods to 0 for all three genotypes (e.g. hom ref, het and hom alt) for sites with potential deamination (C>T and G>A) as described by Martiniano et al.<sup>198</sup>. Following this, the per-individual vcfs were merged using bcftools-v1.3.1. The combined VCF were then split into 15,000 markers each and imputed separately using beagle-4.0 using the 1000G phase3 map included with beagle (\*.phase3.v5a.snps.vcf.gz and plink.chr\*.GRCh37.map) with input through the genotype likelihood option. Run time for imputing using beagle was approximately 280,000 core hours.

## **Supplementary Note 6 - Merge with existing panels**

To assess the genetic relationship between the ancient Viking samples and other populations (both modern and ancient) we merged the whole-genome shotgun data of the Vikings with two different SNP array datasets of modern worldwide and ancient populations. Since most ancient samples from this study were low coverage, to obtain the genotypes of the ancient samples (mostly Viking age) the “samtools mpileup” command was used followed by a single read sampling of the majority allele for each of the sites present in the relevant reference dataset, with mapping and base quality  $\geq 30$ .

### **Scandinavian panel - SNP array of European populations enriched for**

**Scandinavians:** A new reference panel was constructed based on 3 published datasets for which we conducted quality control (QC) analysis: the EGAD00010000632 dataset from Leslie et al.<sup>199</sup> (UK dataset), the EGAD00010000124 dataset from Genetic Analysis of Psoriasis Consortium & the Wellcome Trust Case Control Consortium 2<sup>200</sup> (IRE dataset) and the EGAD00000000120 dataset from The International Multiple Sclerosis Genetics Consortium & The Wellcome Trust Case Control Consortium 2<sup>201</sup> (EU dataset). The UK dataset was genotyped on the Human1-2M-DuoCustom SNPchip and contained 1,115,428 sites and 2,912 individuals. The IRE and EU datasets were genotyped on the Human670-QuadCustom SNPchip with 580,030 sites and included 2,622 and 11,376 individuals, respectively. The UK dataset consist of only UK individuals, the IRE dataset has both UK and Irish individuals and the EU dataset contains individuals from Australia, Belgium, Denmark, Finland, France, Germany, Italy, New Zealand, N. Ireland, Norway, Poland, Spain, Sweden, the UK and the US.

The datasets were converted from their original genotype (.gen) file format to binary plink files using GTOOL and plink<sup>202</sup>, the GTOOL default cut-off of 0.9 for genotype probabilities was used, this included all autosomal + the X and Y chromosomes. The datasets included a list of both SNPs and individuals that passed QC which we used, leaving 870,170 markers and 2,578 individuals for the UK dataset, 535,475 markers and 2,178 individuals for the IRE dataset and 475,806 markers and 10,299 individuals for the EU dataset.

All the datasets were checked to be on the TOP strand as specified by the SNPchip manifest. Then the datasets were put on the plus strand using plink and strand files (detailing for each SNPchip which strand TOP refers to for each individual site, from: <http://www.well.ox.ac.uk/~wrayner/strand/>). Then

493 using liftOver<sup>203</sup> the datasets were lifted from hg18 to hg19. Sites that deviated from Hardy-Weinberg  
494 equilibrium were filtered away, using a cutoff P-value of  $1 \times 10^{-6}$ . The three datasets were then merged  
495 and the sites, were none of the alleles agreed with the hg19 reference sequence, were removed along  
496 with duplicated sites, based on genomic position. Non-autosomal sites were removed. SNPs in the  
497 MHC/HLA region on chromosome 6 were removed, due to the fact that it is hard to map to this region  
498 due to the high degree of recombination and because of observed big differences in frequencies  
499 between the datasets for markers in this region. The CHB (Han Chinese) and YRI (Yoruba)  
500 populations from the 1000 Genomes project phase 3 database were merged to this panel as outgroups.  
501

## 502 **Human Origins panel - Affymetrix Human Origins SNP array panel of** 503 **worldwide populations**

504 This dataset of modern individuals consists of 2180 individuals from 213 worldwide  
505 populations<sup>204,205</sup>. We extracted autosomal genotypes at a subset of 593,102 SNPs that were also  
506 included in the “1240K” capture panel<sup>206</sup>.  
507

## 508 **Ancient panels**

509 We constructed datasets for population genetic analyses by merging the newly sequenced Viking Age  
510 individuals as well as other previously published ancient individuals<sup>20,159,160,186,189,190,198,206–228</sup> with  
511 the two modern reference panels described above. Ancient individuals were represented with  
512 “pseudo-haploid” genotypes, obtained by randomly sampling an allele passing filters (mapping  
513 quality  $\geq 30$  and base quality  $\geq 30$ ), further requiring that it matched one of the two alleles observed  
514 in the reference panel (Supplementary Table 3). For high coverage ancient and modern individuals,  
515 we used diploid genotypes obtained using samtools / bcftools as previously described.  
516

## 517 **1000 Genomes dataset**

518 Five European populations from the 1000 Genomes project phase 3 database were used along with  
519 CHB (Han Chinese) and YRI (Yoruba) populations as outliers to assess the genome wide allele  
520 frequencies for various SNPs associated with pigmentation phenotypes and lactose intolerance. The  
521 five European groups included all the individuals from IBS (Spanish), TSI (Tuscan), CEU (Utah  
522 Residents with Northern and Western European Ancestry), GBR (British) and FIN (Finnish) datasets.  
523

## Supplementary Note 7 - Latent ancestry modelling

Based on the ancient pseudohaploid individuals from the “HO 1240K” panel (see Supplementary Note 6) we ran ADMIXTURE<sup>229</sup> by thinning the dataset for linkage disequilibrium using plink with recommended settings (--indep-pairwise 50 10 0.1). This dataset contained 1169 samples for 171769 markers for the autosomal chromosomes. We did 50 replicates with different seeds for  $k=2$  to  $k=20$ . For each replicate, we calculated the cross-validation error, with the distribution shown as boxplots in Figure S7.1. We used pong<sup>230</sup> to identify the best run for each  $K$  and pong was also used to identify similar components between different  $K$ s. See Figure S7.2 for a visualization for  $K=2$  to  $K=6$ . In Extended Data Fig. 2 we chose the 517 most relevant individuals representing 60 different populations and visualized this for  $K=2$  to  $K=5$ .

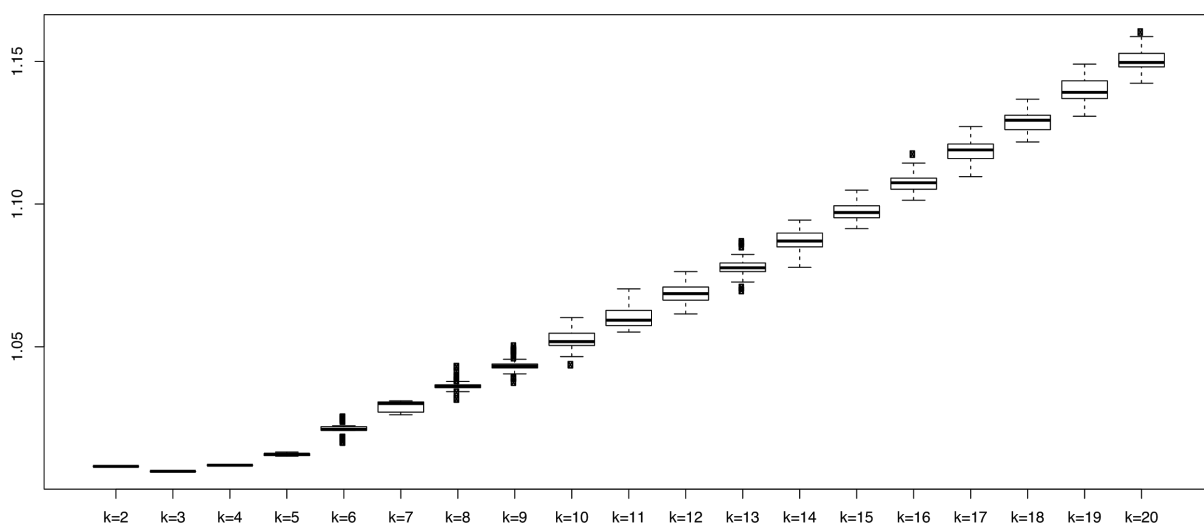

**Fig. S7.1:** Boxplots of the cross-validation error for 50 replicates of admixture runs for  $K=2$  to  $K=20$  with different seed values.

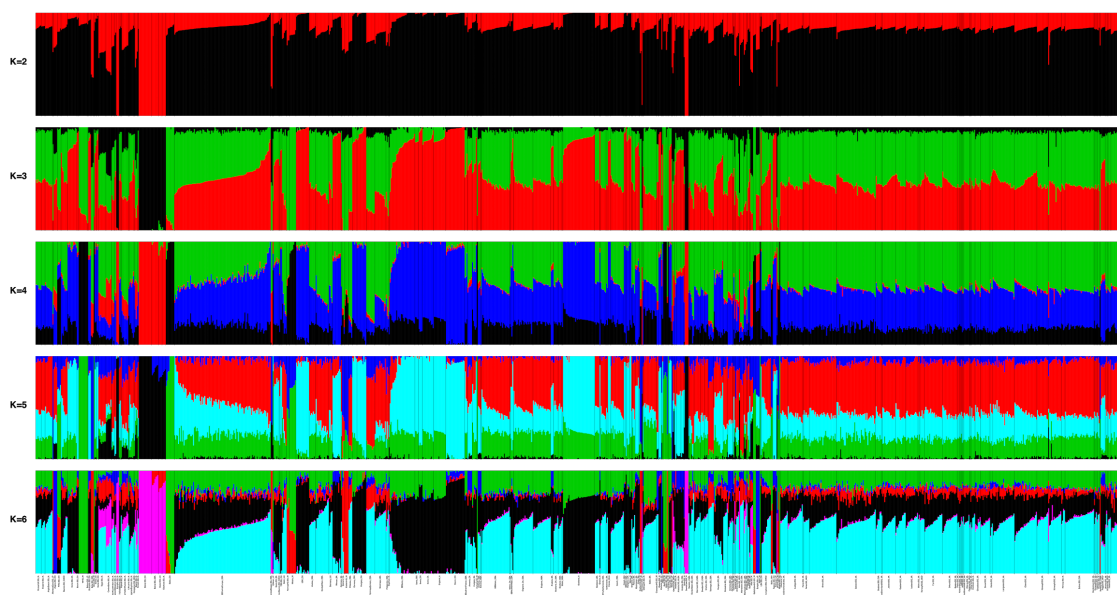

**Fig. S7.2:** Model-based clustering analysis of 1169 individuals: K=2 to K=6. This dataset includes 815 published and 354 ancient samples from this study (mostly Viking Age). See the Extended Data Fig. 2 for a subset of most relevant populations from this dataset.

## 547 **Supplementary Note 8 - Genetic clustering**

548

549 The large number of ancient individuals included in the analysis panels facilitates genetic clustering  
550 using the ancient individuals themselves, rather than projecting them on axes of variation inferred  
551 from modern populations. We carried this out using multi-dimensional scaling (MDS) on a distance  
552 matrix obtained from pairwise identity-by-state (IBS) sharing between individuals.

553

### 554 **Batch effects**

555 Genetic clustering using genetic similarity among the ancient individuals themselves provides a more  
556 accurate picture of their genetic differentiation than projecting them on axes of variation inferred  
557 from modern populations. However, a potential pitfall of this approach is that it is more susceptible  
558 to biases due to batch effects between sets of individuals, e.g. those with differences in sample  
559 processing. The dataset used in this study includes large numbers of individuals, compiled from  
560 heterogenous sample origins (e.g. shotgun sequencing vs in-solution capture), both of which are  
561 expected to exaggerate this potential issue.

562 To investigate this issue, we first assessed dimensions inferred from genetic clustering of 1,265  
563 ancient West Eurasians using multi-dimensional scaling (MDS) on a pairwise identity-by-state (IBS)  
564 sharing matrix. While the first two dimensions differentiate samples with respect to their genetic  
565 ancestry, we observe a possible batch effect separating capture and shotgun samples along dimension  
566 3 (Figs. S8.1 and S8.2).

567

568

569

570

571

572

573

574

575

576

577

578

579

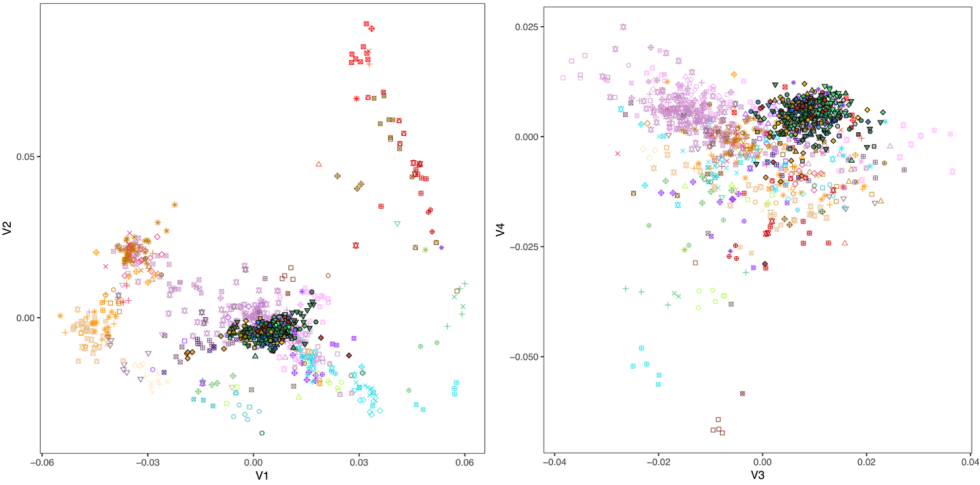

580

581

582

583

584

**Fig. S8.1:** MDS on 1,265 ancient West Eurasian individuals, showing dimensions 1 and 2 (left) and 3 and 4 (right). Plot symbols indicate population grouping as used throughout the study.

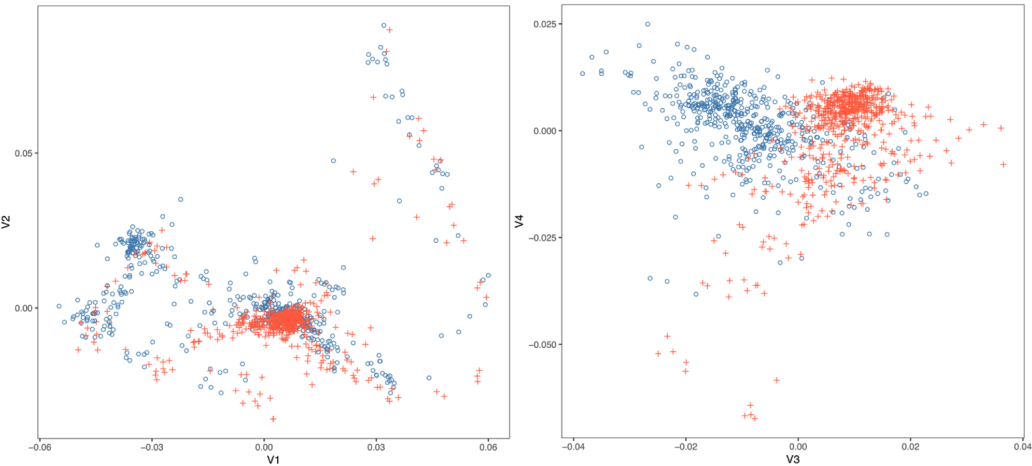

585

586

587

588

589

**Fig. S8.2:** MDS as in Fig. S8.2, but with plot symbols indicating samples processing using shotgun sequencing (red crosses) or in-solution capture (blue circles).

590

591

592

593

To further investigate, we included data from a total of 36 previously published individuals which were generated using both shotgun and capture approaches. We then carried out principal component analysis (PCA) on different subsets of individuals and investigated the loadings of each SNP along the inferred components, using the algorithms implemented in the GCTA package<sup>231</sup>. Performing



594 PCA on the full dataset of 1,265 individuals as well as the shotgun/capture paired individuals recovers  
595 structure that closely resembles the MDS results (Fig. S8.3).

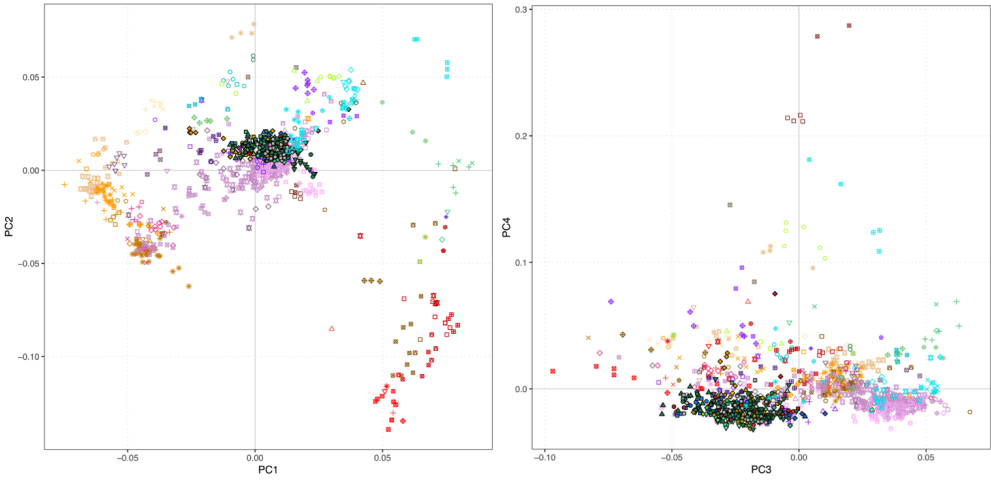

596  
597 **Fig. S8.3:** PCA on 1,265 ancient West Eurasian individuals and shotgun/capture pairs, showing  
598 dimensions 1 and 2 (left) and 3 and 4 (right).

599  
600 We confirm batch effects using the shotgun/capture pairs, which show clear and consistent separation  
601 along PC3 as well as a subtler effect along PC2 (Fig. S8.4).

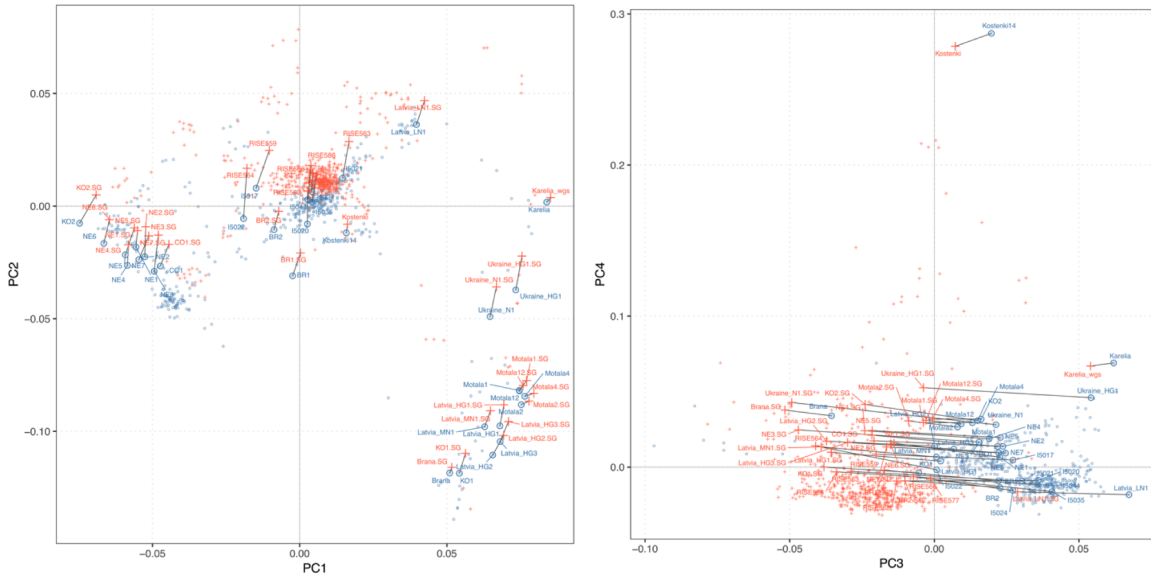

603  
604  
605 **Fig. S8.4:** PCA as in Fig. S8.4, but with plot symbols indicating sample processing using shotgun  
606 sequencing (red crosses) or in-solution capture (blue circles). Pairs of individuals with data from both  
607 approaches are joined with black lines and indicated by sample name.

608

609 However, inspection of the distribution of SNPs with high loadings along PC3 reveals a more  
 610 complex pattern, with batch effects appearing to be confounded with a biological effect due to SNPs  
 611 within genomic regions previously reported to show evidence for recent positive selection in West  
 612 Eurasians<sup>206</sup> (Fig. S8.5).  
 613

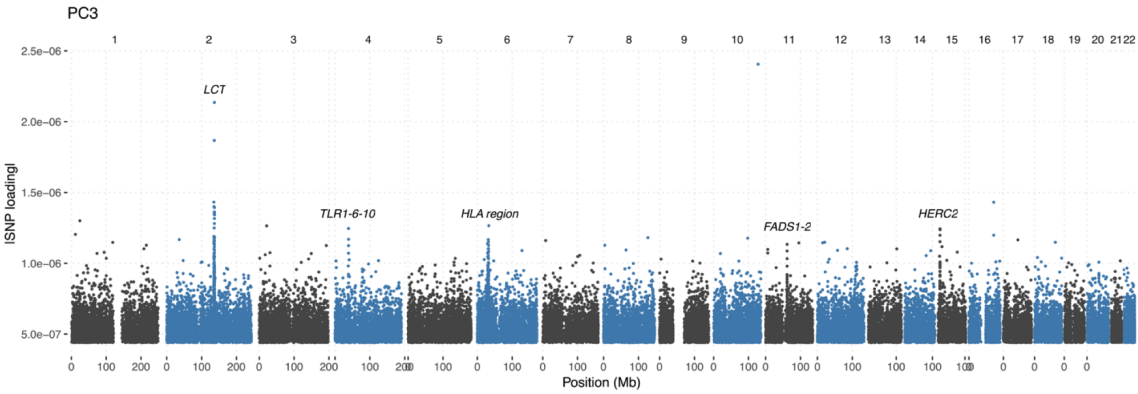

614  
 615  
 616 **Fig. S8.5:** Manhattan plot of SNP loadings along PC3. Peaks of high SNP loadings overlapping genes  
 617 previously reported as targets of recent positive selection in Western Eurasians are indicated.  
 618

619 The observed confounding is not entirely surprising as the investigated ancestry and age groups are  
 620 not evenly distributed across the two sample processing groups. The bulk of the shotgun data  
 621 originates from Viking Age and later individuals from Northern Europe, in contrast to a large fraction  
 622 of earlier Bronze Age individuals from Western and Southern Europe in the capture data. We  
 623 therefore repeated the PCA analysis on a subset excluding any Iron Age or later individuals. Similar  
 624 to the analysis with all individuals, we find evidence for shotgun/capture batch effects along PC3, but  
 625 without strong effects of individual gene regions under selection as seen before (Fig. S8.6, S8.7)  
 626



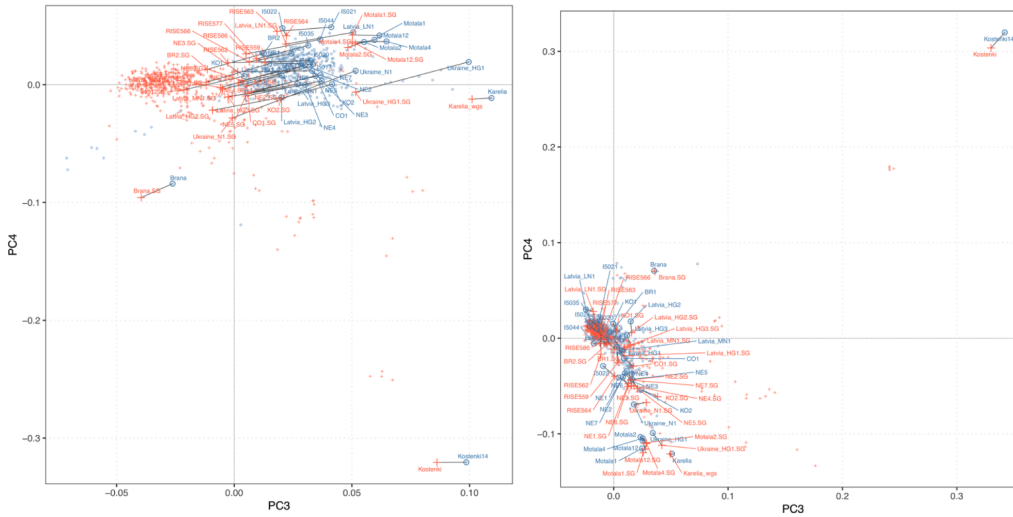

**Fig. S8.8:** Biplot of PC3 and PC4 from a PCA on all individuals, using two different subsets of SNPs for batch effect correction: SNPs with high loadings in pre-Iron Age individual dataset (left) or in the full dataset (right).

We find that batch effects are reduced but still visible along PC3 removing the SNPs identified using the pre-Iron Age individuals (Fig. S8.8 left), whereas they are removed from PC3 and PC4 when excluding the set of SNPs identified in the full set (Fig. S8.8. left). Investigating the loadings along PC3 in the pre-Iron Age corrected SNP set revealed that effects of genomic regions under selection are still present and even amplified compared to the full set of SNPs (Fig. S8.9).

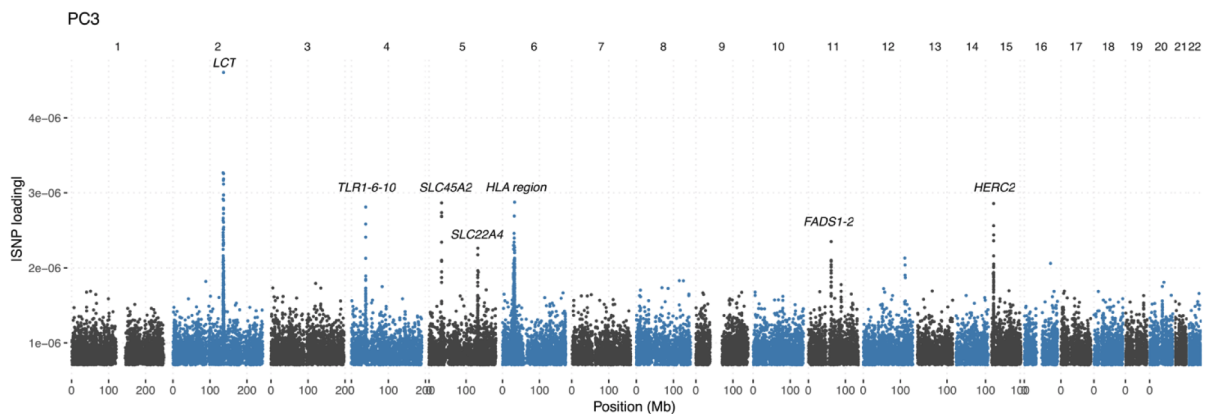

**Fig. S8.9:** Manhattan plot of SNP loadings along PC3 for full set of individuals, using batch correction by removing SNPs identified in the pre-Iron Age individuals.

658

659 In summary, we find that both differences in sample processing and genuine biological differences  
660 due to regions affected by recent positive selection impact genetic affinities between individuals in  
661 subtle and complex ways. The larger sample sizes available of Western Eurasians from the Bronze  
662 Age onwards, combined with their greater genetic homogeneity compared to earlier individuals has  
663 facilitated the detection of these previously hidden effects. As neither of the two effects is desirable  
664 in analyses of population history, we restricted all analyses of population history which use both  
665 shotgun and capture individuals to the subset of SNPs identified using the full dataset (i.e. all outliers  
666 in Figure S8.5).

667

### 668 **Clustering analysis**

669 We combined the batch-corrected MDS with further dimensionality reduction using uniform  
670 manifold approximation and projection (UMAP), an approach that has recently been shown to  
671 effectively visualize population structure among individuals across multiple scales<sup>1</sup>. Results of this  
672 analysis are shown in Figure 2 and Figure S8.10. The projection using IBS-UMAP (using the first 14  
673 dimensions from the MDS) enhances local clustering of ancient individuals with a similar genetic  
674 ancestry, without loss of global relationships among the different clusters. Furthermore, genetic  
675 clusters not evident from the first two dimensions of the MDS are easily recognizable, exemplified  
676 by the clear separation of Iberian and British Neolithic individuals in IBS-UMAP (Fig 2).

677

678

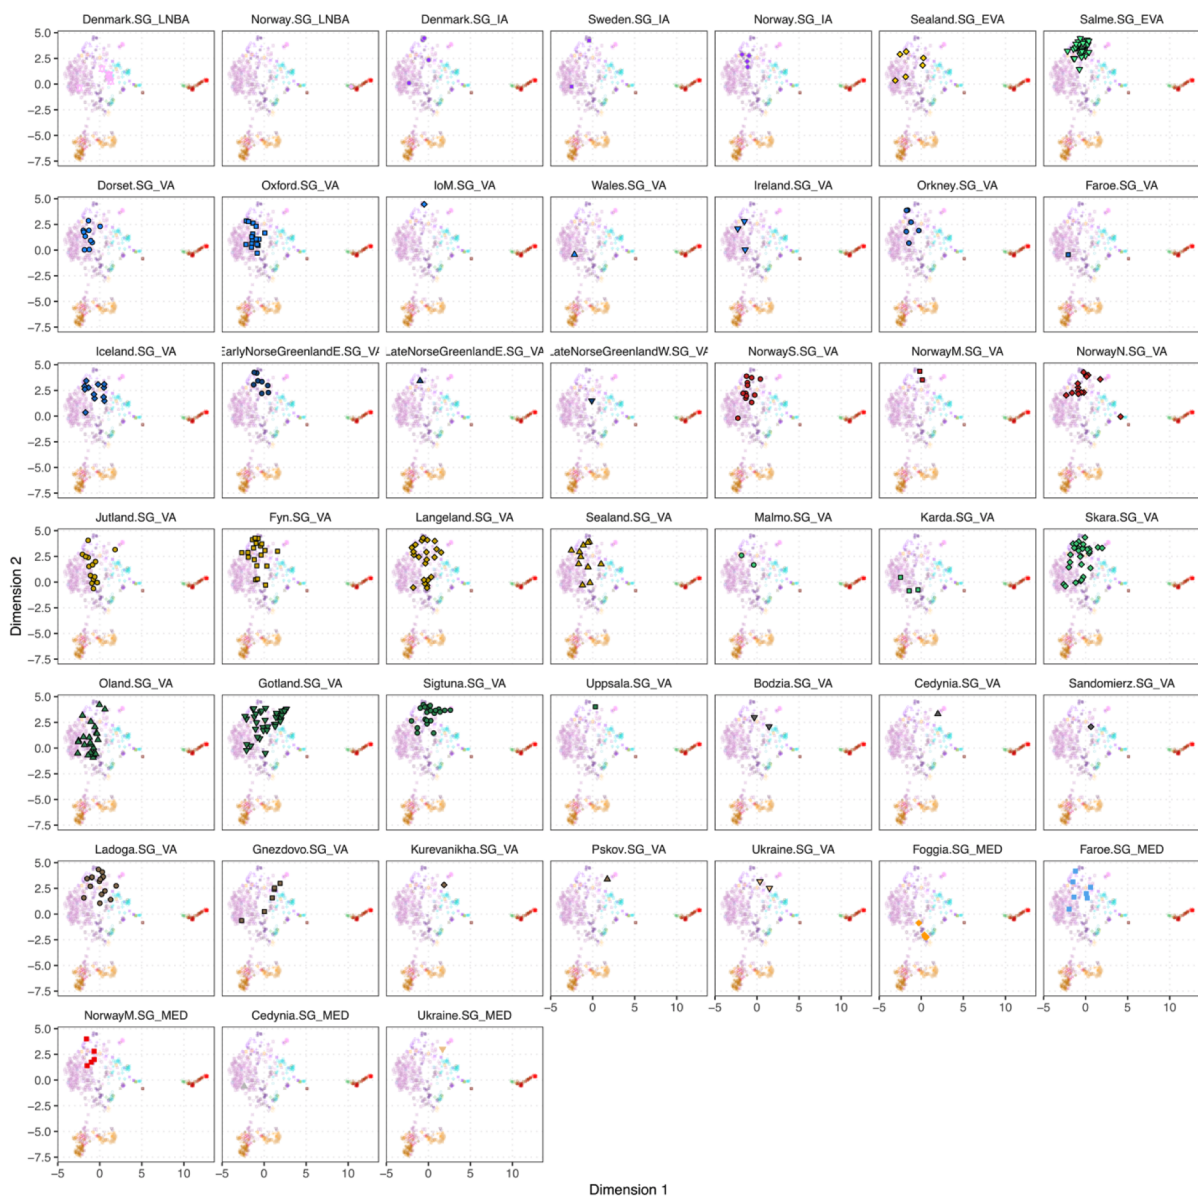

**Fig. S8.10:** Genetic clustering of study individuals using IBS-UMAP. Each panel highlights position of individuals from indicated groups over the full set of individuals.

## **Supplementary Note 9 – Population genetics**

### **Ancestry modelling using qpAdm**

We performed estimation of ancestry proportions for ancient groups using qpAdm<sup>4</sup>. Each ancient group was initially modelled following previous studies of ancient Europeans, using three deep ancestral lineages: West Eurasian hunter-gatherers (represented by Loschbour); Anatolian farmers (represented by individuals from Barcin); and Steppe pastoralists (represented by individuals associated with the Yamnaya culture). Ancestry proportion estimation using qpAdm is based on  $f_4$ -statistics of the form  $f_4(X, O1; O2, O3)$ , where X is either the source or target population, and O1/O2/O3 are triplets of outgroups to the source/target groups. As such, they are susceptible to batch effects described above, e.g. if both source/target groups and the set of outgroups are composed from different sample processing schemes. To minimize batch effects and/or biases due to ancient DNA damage or SNP ascertainment, we conducted this analysis on a dataset restricted to shotgun sequenced individuals, using 1,485,845 transversion-only sites that were found polymorphic and with a minor allele count  $\geq 5$  in an outgroup population (YRI) in the 1000 Genomes Project. For all analyses we used a set of nine outgroups

KwazuluNatal.SG\_N

Ust.SG\_UP

Yana.SG\_UP

Sunghir.SG\_UP

Bichon.SG\_LP

Zagros.SG\_EN

DevilsCave.SG\_N

Baikal.SG\_EN

Alaska.SG\_LP

Results of these analyses are shown in Extended Data Fig. 6 and Supplementary Table 7. While the three source groups (Loschbour.SG\_M, Barcin.SG\_EN, Yamnaya.SG\_EBA) provide a good fit for most ancient Europeans, a number of them reject the fit at  $p < 0.01$ . We attempted to further improve the fit of those groups by testing each of the following additional putative source groups in turn in a four-way model.

720

721 CaucasusHG.SG\_M

722 Armenia.SG\_MLBA

723 Anatolia.SG\_MLBA

724 Botai.SG\_EBA

725 XiongNu.SG\_IA

726 SarmatianRussia.SG\_IA

727 Saami.SG\_IA

728 Tagar.SG\_IA

729

730 All target groups except Oland.SG\_VA were successfully modelled this way ( $p \geq 0.01$ ), and can be  
731 broadly grouped into two patterns. For northern and eastern Viking Age groups (NorwayN.SG\_VA,  
732 Salme.SG\_VA, Sigtuna.SG\_VA, Ladoga.SG\_VA), source groups with east Eurasian ancestry  
733 (XiongNu.SG\_IA, Tagar.SG\_IA, Saami.SG\_IA, SarmatianRussia.SG\_IA) provide good model fits,  
734 with estimated ancestry proportions reflecting the overall east Eurasian ancestry proportions. We note  
735 that among the fitting source groups are three Iron Age individuals with Saami ancestry from  
736 Levänluhta in Finland (Saami.SG\_IA), which have recently documented the extension of Saami  
737 acnetry further south than the present-day distribution<sup>232,233</sup>. While the present analysis does not allow  
738 the distinction of the source groups, the fact that we find individuals with Saami-related ancestry  
739 among the Norwegian Viking Age groups suggests gene flow with Saami groups as a likely  
740 contributor to these signals. A different pattern is found for Kärda.SG\_VA and Foggia.SG\_MED,  
741 which can only be fit as models including eastern source groups rich in Caucasus-related ancestry  
742 (CaucasusHG.SG\_M, Armenia.SG\_MLBA, Anatolia.SG\_MLBA). Similar ancestry compositions  
743 have been previously documented in Greek Bronze Age individuals<sup>220</sup> and contemporary southern  
744 Italians<sup>234</sup>. However, the presence of such ancestry in Kärda in Southern Sweden is more surprising,  
745 suggesting either descendants of a remnant group from an earlier expansion of southeastern groups  
746 (e.g. during the migration period) or ongoing contacts during the Viking Age.

747

## 748 **Baltic ancestry in Gotland**

749 Genetic clustering using IBS-UMAP suggested genetic affinities of some Viking Age individuals  
750 with Bronze Age individuals from the Baltic. To further test these, we quantified excess allele sharing  
751 of Viking Age individuals with Baltic BA compared to early Viking Age individuals from Salme



using  $f_4$  statistics. We find that many individuals from the island of Gotland share a significant excess of alleles with Baltic BA (Extended Data Fig. 4), consistent with other evidence of this site being a trading post with contacts across the Baltic Sea.

## Genetic diversity

We quantified genetic diversity for ancient groups using “conditional nucleotide diversity” as previously described<sup>5</sup>. Briefly, we selected SNPs that were polymorphic in an outgroup population (YRI from the 1000 Genomes Project) and with a minor allele count  $\geq 5$ , and calculated average pairwise differences between individuals. Results of this analysis are shown in Fig. S9.1.

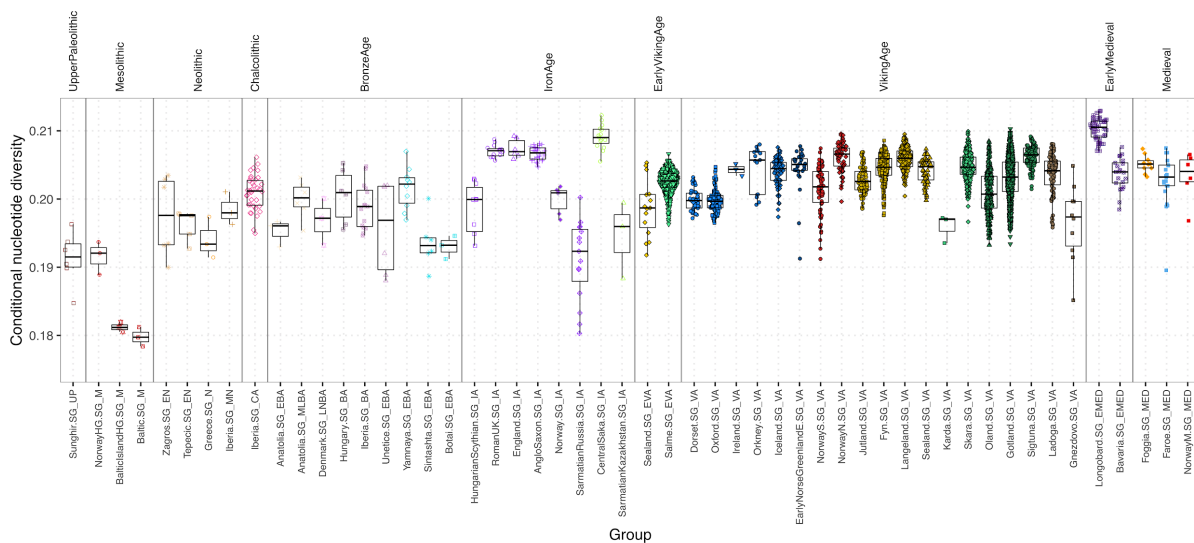

**Fig. S9.1:** Conditional nucleotide diversity of various VA groups from this study and comparative ancient populations.



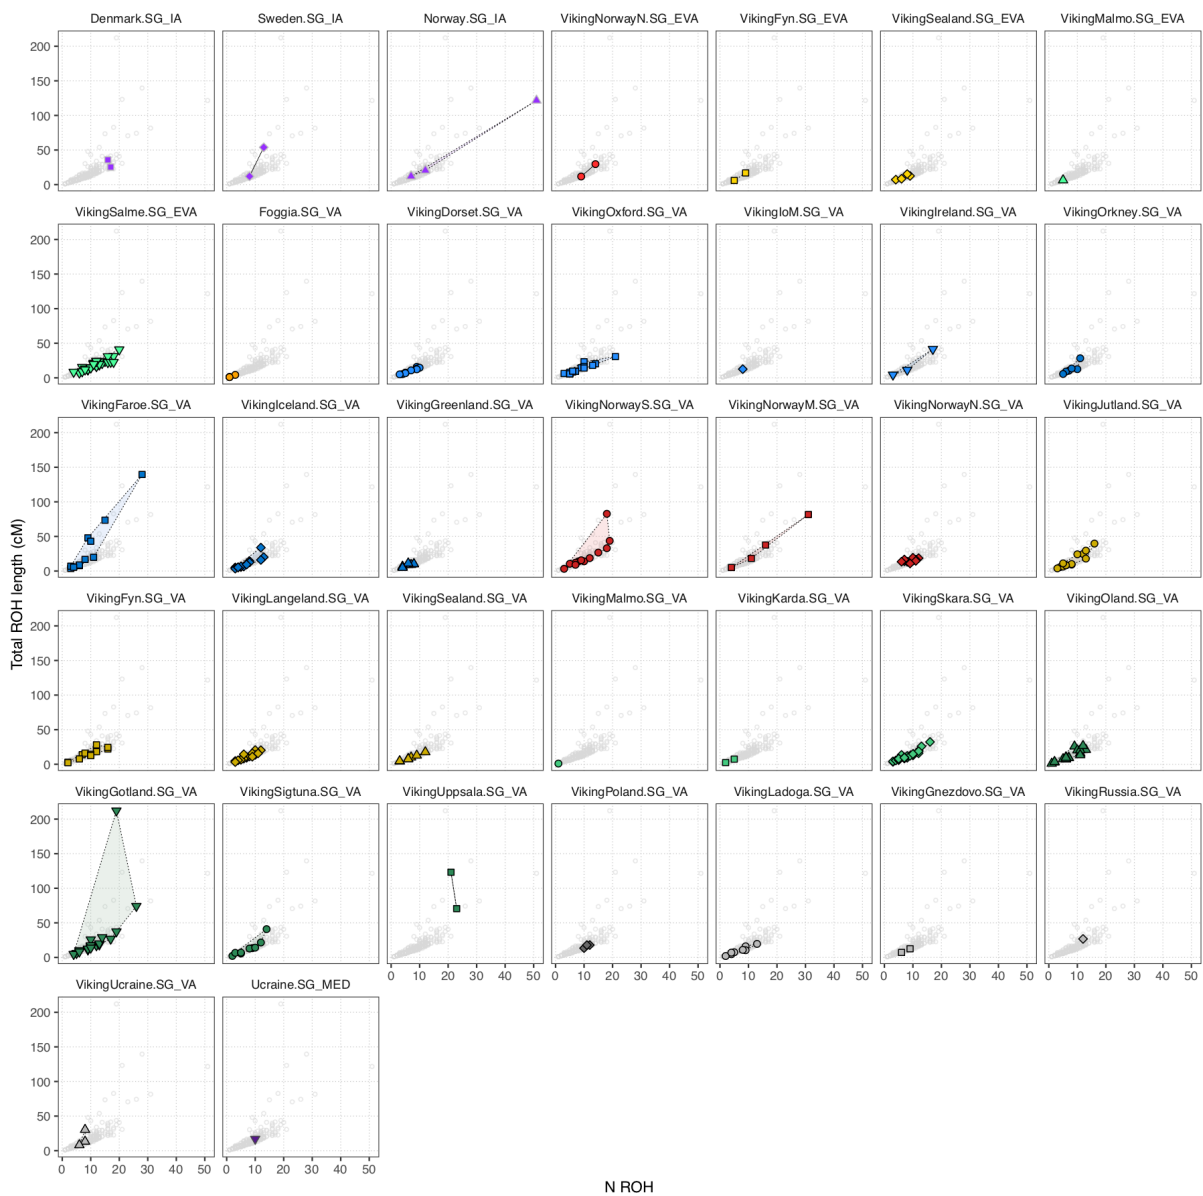

**Fig. S10.2:** Number and total length of genomic segments homozygous-by-descent in Viking Age individuals.

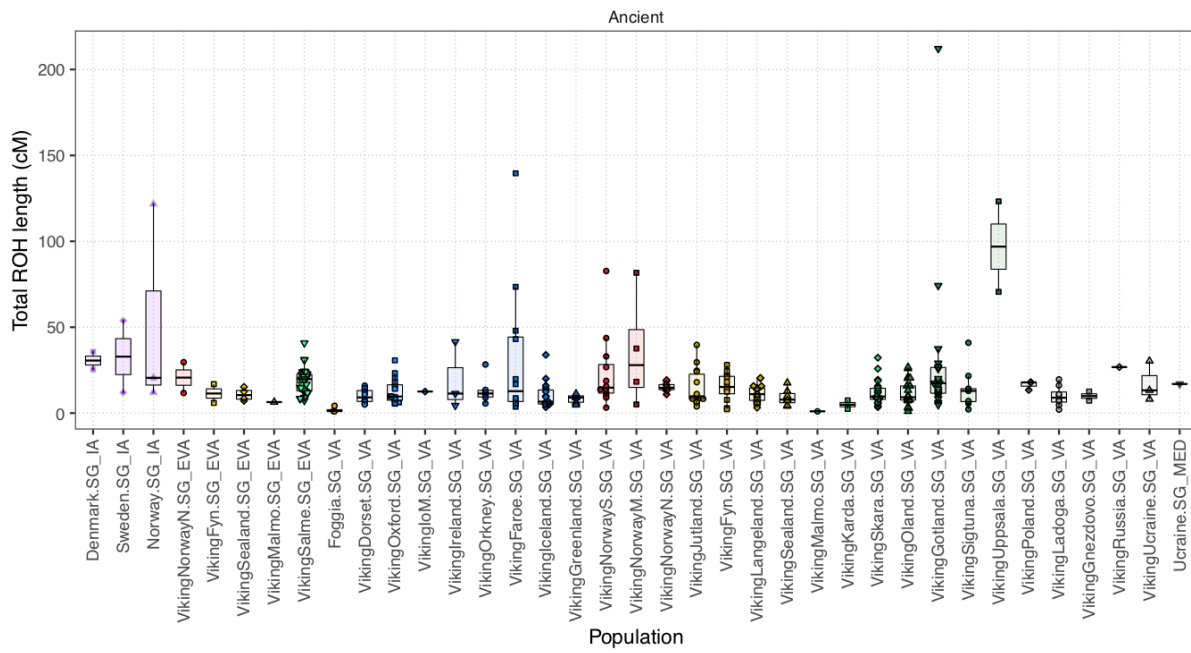

**Fig. S10.3:** Distributions of total length of genomic segments homozygous-by-descent in Viking Age individuals.

## 794 **Supplementary Note 11 - Chromosome Painting**

795

796 When examining the sequence data for the 319 ancient Viking genomes sequenced to 1X or higher,  
797 we found that standard analyses were inadequate in extracting population structure within  
798 Scandinavia. We therefore used a fine-scale method called Chromosome Painting<sup>235</sup> to extract  
799 maximum signal from the ancient DNA.

800 To understand our analysis, it is important to define the terminology:

- 801 ● “Recipient”: an individual whose genetics we wish to describe.
- 802 ● “Donor individuals”: a set of individuals who we will “paint” the recipient from, that together  
803 form a “Panel”.
- 804 ● “Paint”: Use a model, ChromoPainter<sup>235</sup>, to estimate the total amount of genome that each  
805 donor is the closest relative to the recipient in the panel.
- 806 ● “Palette”: a grouping of the donors into clusters, to obtain the amount of genome that the  
807 recipient has a closest relative from each donor population.
- 808 ● “Surrogate population”: a population that we will use to represent a named population of  
809 interest.

810 Briefly, we will use ancient DNA to create a set of K high-quality surrogate populations that are  
811 compared to a palette of M donor populations, with  $M > K$  to allow us to retain as many individuals  
812 as possible. We will then be able to describe each modern or ancient individual by painting them  
813 against the donor populations (to form a palette vector of length M) and then describing them as a  
814 mixture of the K surrogate populations’ palettes. This procedure is a refinement of that used by the  
815 GLOBETROTTER method<sup>236</sup>.

816

817 This approach has the advantage that it is robust to batch effects of modern and ancient samples,  
818 because we focus on comparing all individuals to only one panel. The chromosome painting method  
819 contains an error rate parameter that is unique to each sample. Therefore, batch effects will be treated  
820 as noise, which will be higher in the non-reference batch, and should not produce systematic bias.

821

### 822 **Chromosome Painting Procedure:**

- 823 1. **Unsupervised Ancient Sample Analysis.** We first tried ChromoPainter and  
824 FineSTRUCTURE<sup>235</sup> in its default, unsupervised approach. However, unsupervised, there

was not clear population structure in this data for the clustering method to identify strong structure (Figure S12.1).

2. **Create Modern Reference.** Create a modern reference panel using 1873 modern individuals sampled from Northern Europe, using the standard FineSTRUCTURE pipeline:
  - a. Apply ChromoPainter to paint all modern individuals using the remaining individuals as donors;
  - b. Cluster with FineSTRUCTURE;
  - c. Assign geographical meaning to the clusters using the known labels;
  - d. Call the resulting clustering the “Modern Reference Panel”, which consists of 23 Modern Surrogate populations and 23 Modern Donor populations.
3. **Create Ancient Reference.** Create an “ancient reference panel” using the modern reference panel:
  - a. Apply ChromoPainter to paint all ancient individuals using the “Modern Population Palette”;
  - b. Create a supervised “Ancient Population Palette” consisting of populations that: A: “represent” a modern ancestry direction, or B: are “best associated with” a modern ancestry direction, using an iterated Mixture Model;
  - c. Create an “Ancient Population Surrogate” for each modern population, consisting of the individuals that “represent” each modern population. For  $K=7$  modern populations, this results in a matrix of  $K=7$  rows (surrogate populations) and  $2K=14$  columns (donor palette populations) which captures the ancient population structure.
4. **Infer Ancestry.** Learn about population structure in either modern individuals or ancient individuals by painting them with respect to the “ancient population panel” and fitting them as a mixture using the “ancient population surrogates”.

After the panels are constructed, there are additional steps to be performed:

5. **Check Ancient Reference.** We perform a range of checks and sensitivity analyses to ensure that the inference procedure performs as expected.
6. **Principal Components Analysis.** As a sensitivity and triangulation exercise, we also consider the PCA of the ancient population panel as well as an all-vs-all ChromoPainter analysis including modern and ancient populations.
7. **Interpretation.** We then interpret the ancestry results.

## 857 **Ancient Sample Analysis**

858 We used fs2.0.8 ([www.paintmychromosomes.com](http://www.paintmychromosomes.com)) using the protocol described with the software  
859 <sup>235</sup>) to paint the 319 individuals whose ancient DNA will form the “ancient sample”,. Each is painted  
860 using all other ancient samples to create the “coancestry matrix”, which is the number of independent  
861 segments or “chunks” or genome for which individual j (columns) is the closest match to individual  
862 I (rows). This allowed us to identify related individuals who share more and longer chunks than do  
863 unrelated individuals; after removal of one of each related pair we were left with 255 unrelated ancient  
864 individuals who will be used to create the “ancient panel”. The coancestry matrix is then used by  
865 FineSTRUCTURE to perform unsupervised clustering, as shown in Figure S11.1.

866

867 Whilst there is population structure visible in these results, it is insufficient to clearly define useful  
868 population labels. This is because a) there are relatively few ancient samples, b) the ancient  
869 populations come from very similar populations, and c) many individuals are not in fact  
870 representatives of ancient population groups.

871



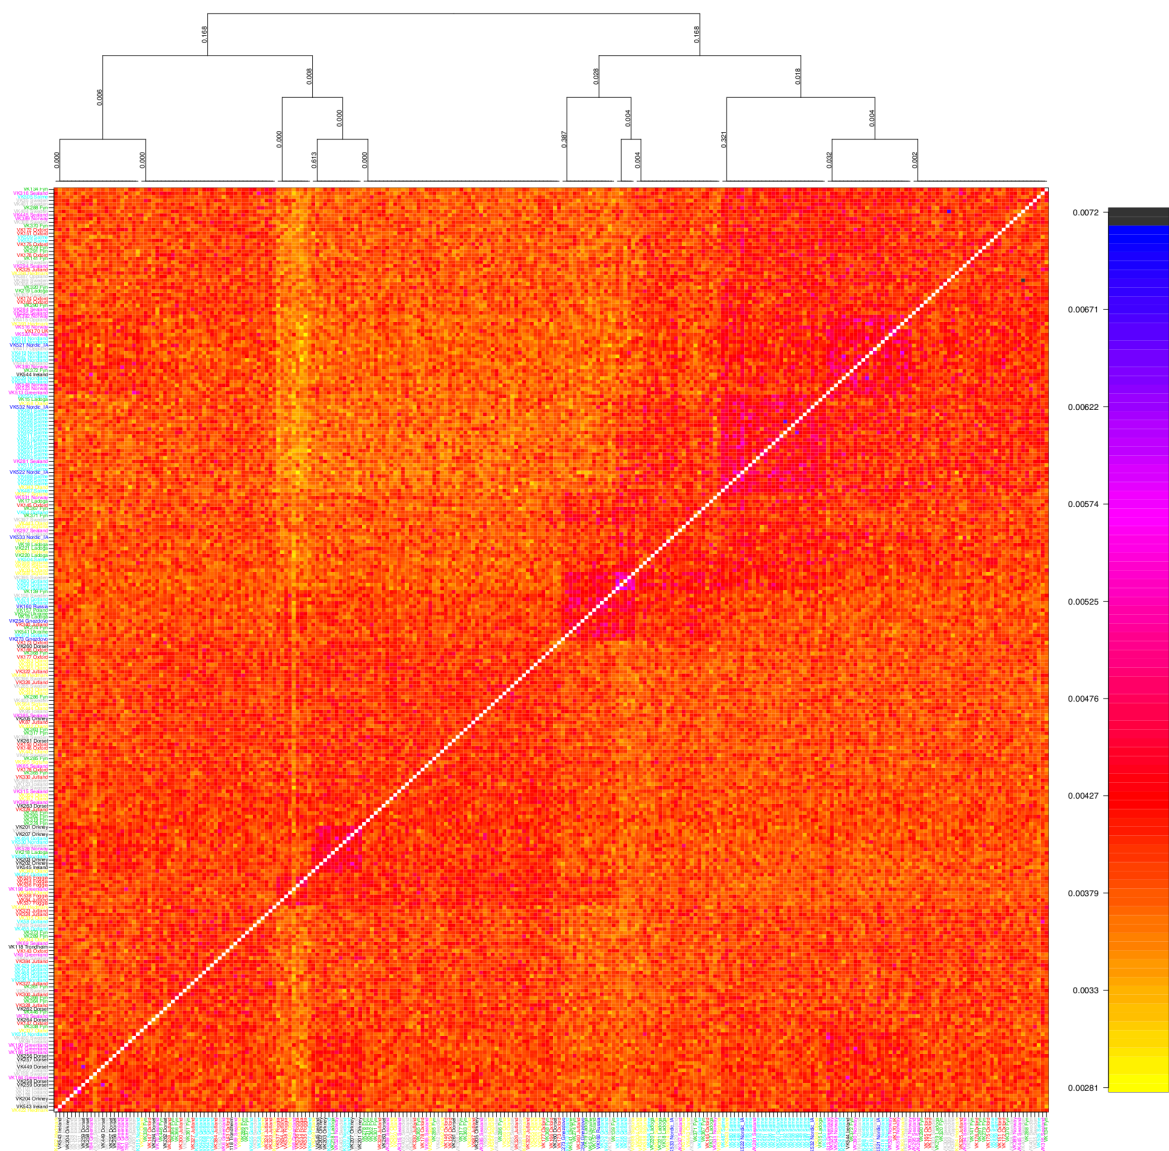

**Fig. S11.1:** Unsupervised ChromoPainter and FineSTRUCTURE results for 255 unrelated ancient individuals. The tree shows the clustering and relationship between clusters as inferred by FineSTRUCTURE, whilst the heatmap shows the Coancestry Matrix output by ChromoPainter.

## Modern References

We used fs2.0.8 ([www.paintmychromosomes.com](http://www.paintmychromosomes.com)) using the protocol described with the software<sup>235</sup> to paint 1675 modern individuals primarily from across Europe (UK, Italy, Poland, Denmark, Sweden, Finland, Norway, as well as China and Africa) who together form the “modern sample”. FineSTRUCTURE identified 40 populations which after removal of small populations and merging of the Chinese (CHB) and African (YRI) sub-populations created 23 modern populations consisting



883 of the 1554 unrelated individuals who could be associated with a modern population label. These  
 884 together will form the “modern reference panel”. Painting against this “Modern Population Palette”  
 885 is done by simply summing the contribution from each individual in each donor population.  
 886  
 887 These results are shown in Figure S11.2. The clustering is strong and perfectly stratified by population  
 888 label. Each population is characterized by receiving higher ancestry from its own population,  
 889 implying that each represents a unique aspect of genetic drift.  
 890

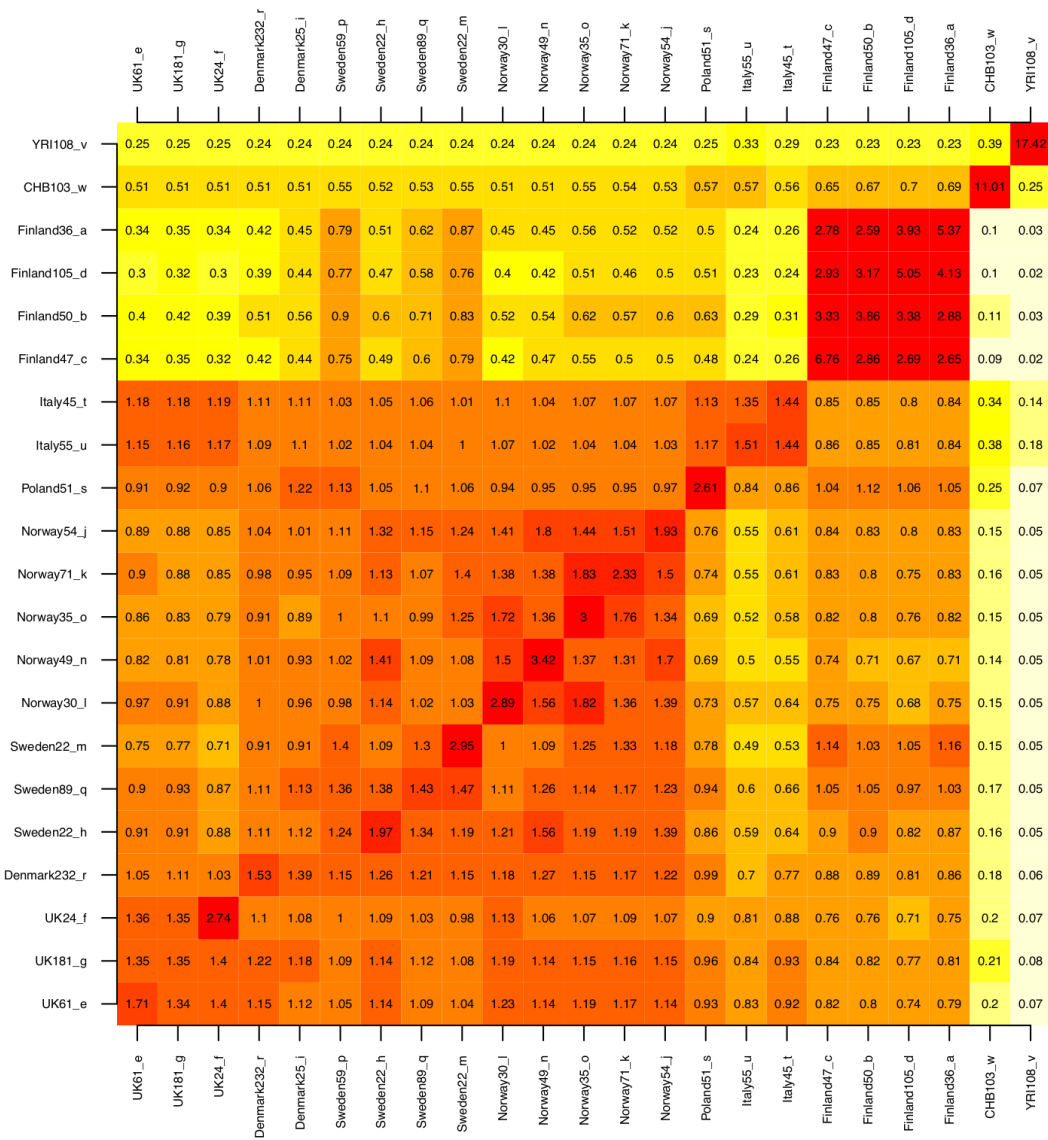

891  
 892 **Fig. S11.2:** Unsupervised ChromoPainter and FineSTRUCTURE results for 1554 unrelated modern  
 893 individuals, where all donor individuals in the same population (i.e. columns) have been summed to

894 create a “population donor palette”, which is averaged over all individuals in the same “recipient  
 895 population” (i.e. rows). The tree shows the relationship between the populations as inferred by  
 896 FineSTRUCTURE.

897

## 898 Ancient References

899 This stage is more involved. We first:

900 **a. Apply ChromoPainter to paint all ancient individuals using the “Modern Population**  
 901 **Palette”.**

902 We now use ChromoPainter v2 to paint each ancient sample against each modern sample. Unlike  
 903 above, where fs2 automatically learns parameters (which measures recombination rate and which  
 904 measures error rate), we have to manually learn these using ChromoPainter v2’s Expectation-  
 905 Maximisation procedure, as performed in the GLOBETROTTER method <sup>236</sup>. We then rerun  
 906 ChromoPainter v2 with these parameters fixed for all individuals. We obtain a painting for each  
 907 ancient sample in the ancient panel, described as a K=23 long palette as shown in Figure S11.3.

908

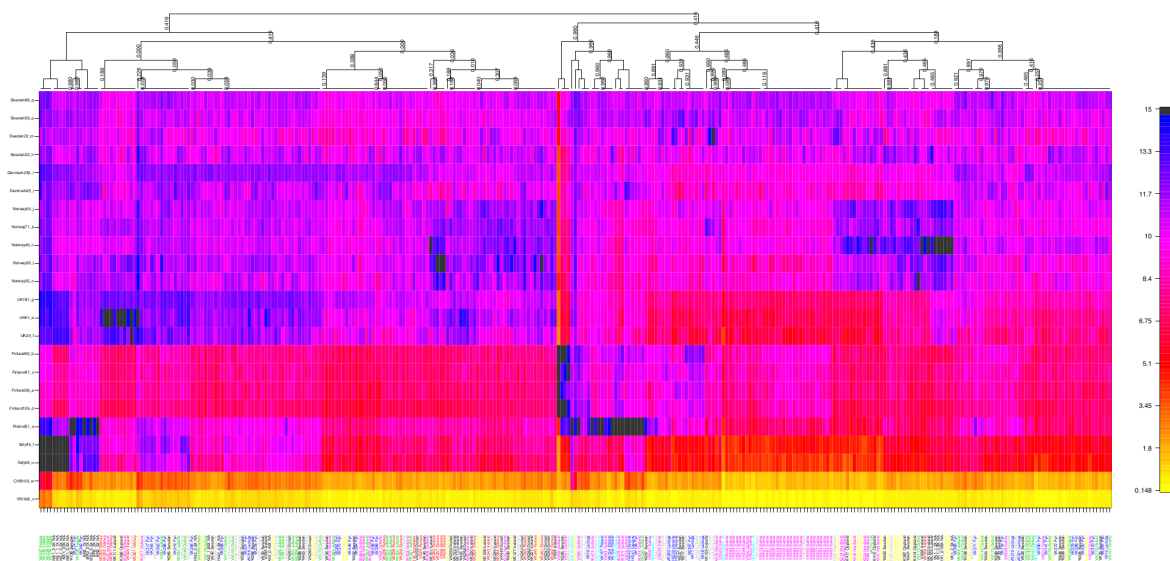

909

910 **Fig. S11.3:** Ancient panel painted against the Modern Population Palette. The palette is ordered as in  
 911 Figure S11.2, whilst the ancient individuals are ordered according to the FineSTRUCTURE  
 912 clustering.

913

914 There are three advantages of using the modern palette, i.e. using Figure S11.3 over Figure S11.1:

- 915 1. Because the donor populations are much larger, there is reduced statistical noise in the  
 916 painting.

2. The donor populations are readily interpretable.

3. The ancient individuals naturally separate into populations that share a lot of drift with specific modern populations – i.e. they are “representative” of them, and those that don’t.

Further – and perhaps surprisingly – most modern European populations (at the level of the 7 labels, not the 23 inferred populations) looks to be effectively represented.

In terms of difficult to assign populations, Denmark is one. The individuals which best match a Denmark population also well-match the “UK181\_g” population. The UK populations contain individuals from the PoBI study and so we can confirm that these are English and hence contains a high proportion of Anglo-Saxon ancestry. The “UK61\_e” population which is well-matched by the ancient Orkney individuals contains individuals from Scotland and Northern Ireland, whilst “UK\_24f” contains individuals from Wales. Another difficult population is Sweden, for which ancient individuals often well-associate with significant Finland or Norwegian ancestry.

We exploit these labels by creating an initial labelling of the ancient populations. To do this we normalise the ancient-vs-modern coancestry by a) calculating the amount of ancestry received per donor individual from the 7 labelled countries; b) normalising each donor label to have mean 1. Figure S11.4 shows how this normalisation changes the matrix. This normalisation is chosen to move from a representation that asks “which populations are important for an individual” to one that asks “which individuals are important for a population”?

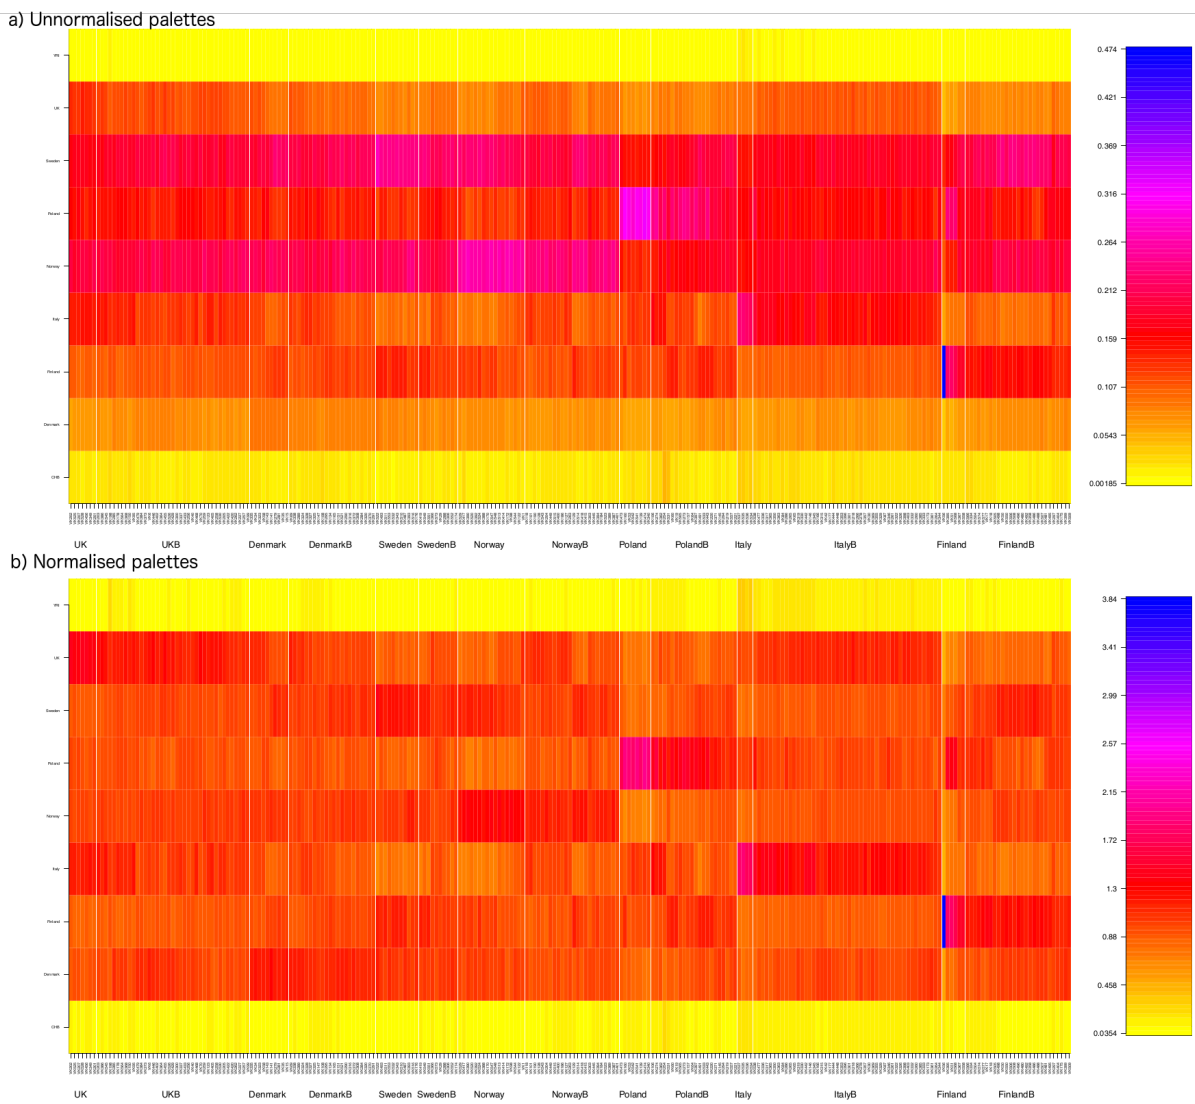

**Fig. S11.4:** a) the ancient individuals represented by their palettes, in unnormalised form, for which each column represents the importance of each population to a specific individual. b) the normalised coancestry matrix on which selection of individuals is performed, for which each row represents the importance that each individual has to a specific population.

For each of the 7 European labels, we then use the following criteria to select “potential representative individuals”:

- Individuals score population  $X$  more than any other population in the normalised coancestry;
- Additionally, they are in the top  $x_k$  for population  $k$ , where  $x$  is chosen to represent the first change-point in the density of scores (Figure S11.5).

The remaining individuals are then assigned to their best-matching population as “potential non-representative donors”.

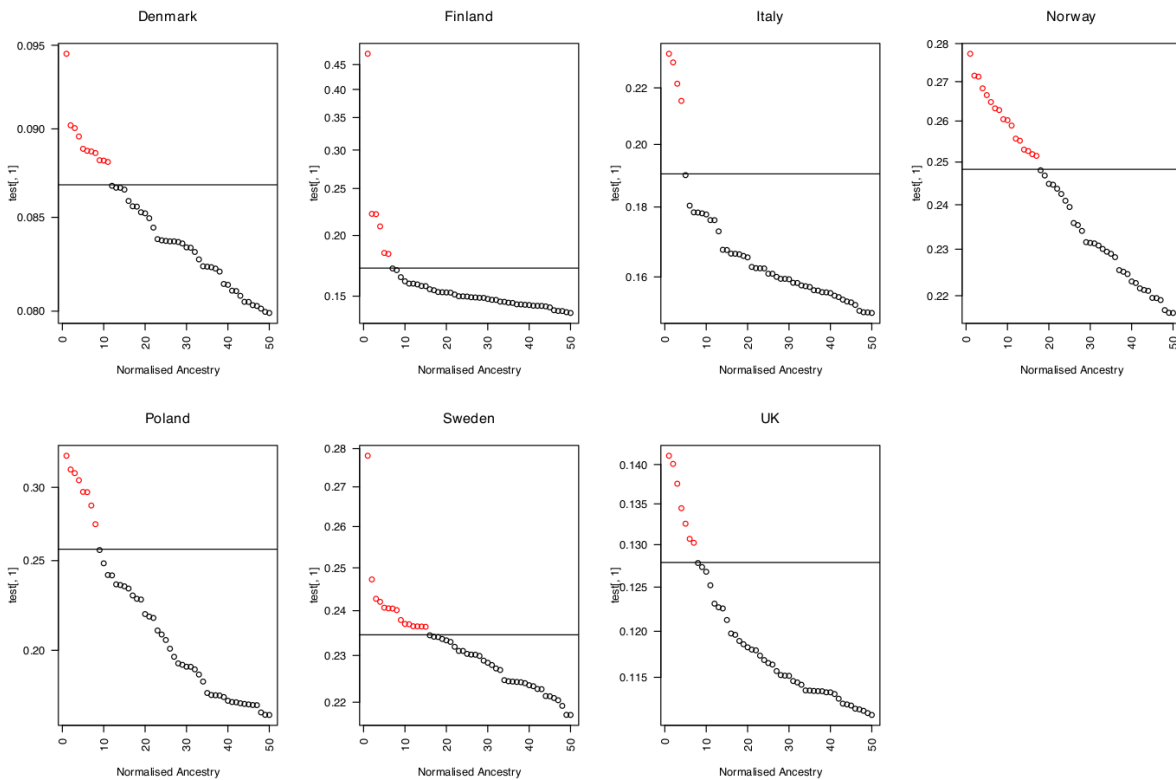

952

953 **Fig. S11.5:** Thresholds for defining the most important individuals for each modern population. All  
 954 individuals above the line are chosen as representative, whilst those below may be assigned to their  
 955 best scoring population as “non-representative donors”.

956

## 957 Ancient Population Palette

958 We are now in the position of having a well-chosen set of populations. The next task is to create an  
 959 ancient population palette that can be used as a reference. This stage follows the procedure used in  
 960 GLOBETROTTER<sup>236</sup>.

961

962 First we repaint each ancient individual using the 14 donor populations, this time “leaving out”  
 963 themselves as donors from their own population, and one random individual from each of the other  
 964 populations<sup>236</sup>. This is done three times: once to learn the painting parameters  $N_e$  and  $\mu$ , a second  
 965 time to learn a genome-wide prior for the donor palette, conditional on the parameters; and a final  
 966 time using a shared  $N_e$ ,  $\mu$ , and an individual-specific donor-prior, to obtain a high-quality palette. For  
 967 each of the 7 surrogate populations (defined by the “representative individuals” above) we learn the  
 968 average amount of genome received from each donor individual in each donor population. This K by

969 M=2K matrix is the “ancient population palette” for the ancient population panel. The results from  
970 this are shown in Figure S11.6, for both the ancient panel and the modern panel.  
971

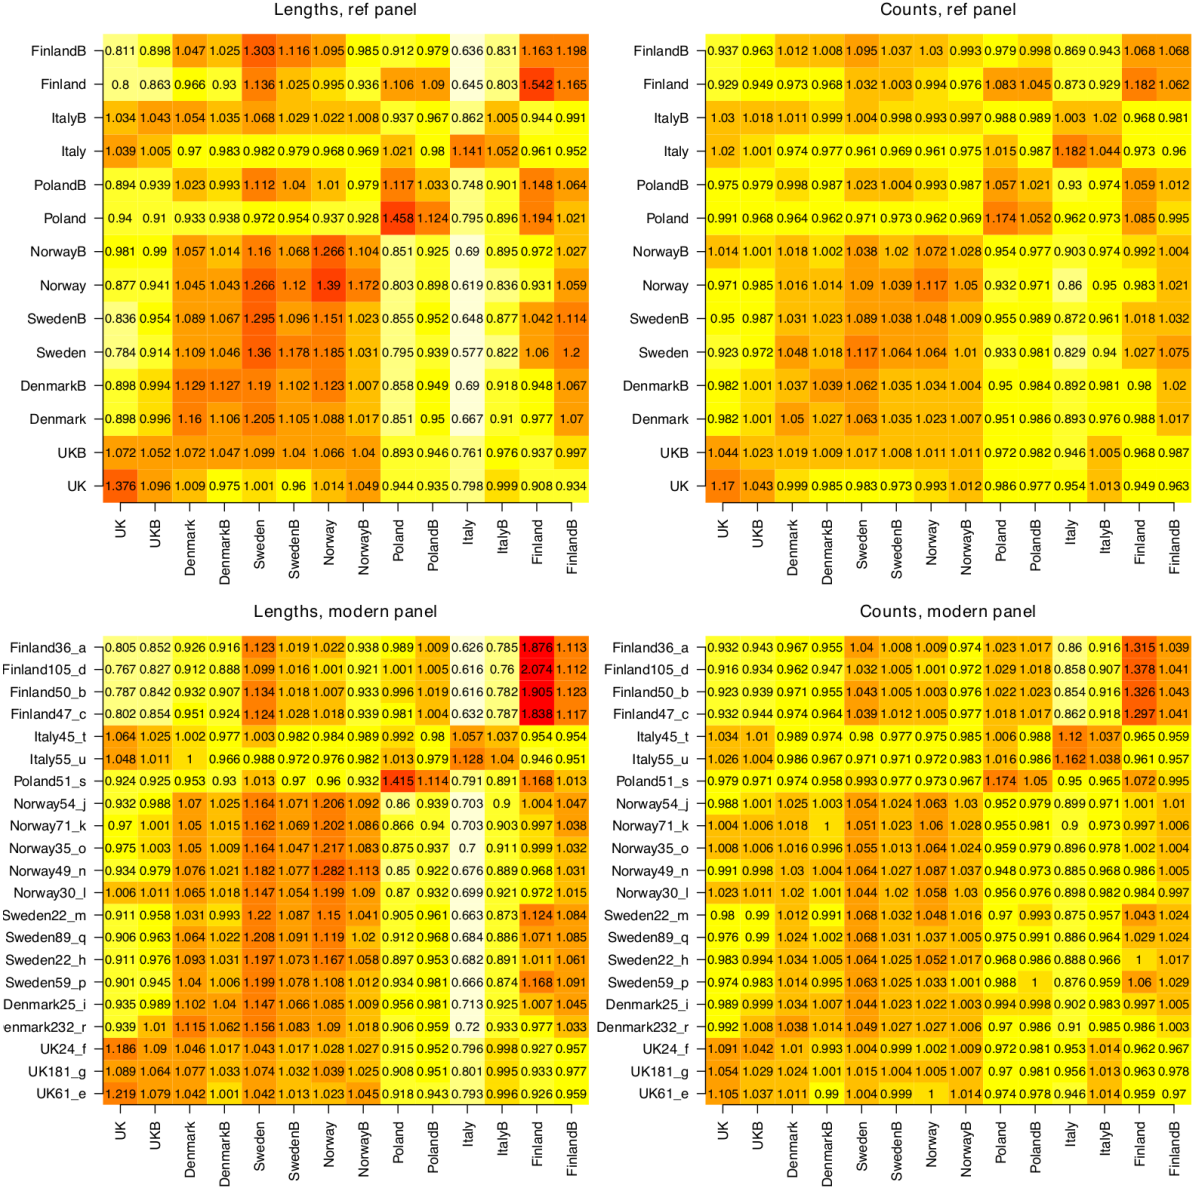

972  
973 **Fig. S11.6:** Ancient DNA painting palette (top) and modern panel painted against the ancient panel  
974 (bottom). We show both the total genome shared (lengths) and inferred number of shared  
975 recombination events (counts). We use the lengths data for onward analysis. The plots show the  
976 average of each score, per donor individual, normalised to have mean value of 1. The rows show the  
977 average for each recipient individual in a population, when painted against the populations in the  
978 columns.

980 The importance of the leave-one-out procedure is that now the individuals used in the donor  
 981 populations (who cannot share genome with themselves) are now exchangeable with the individuals  
 982 in the modern populations. That is because they are all painted against exactly  $n_k - 1$  donor  
 983 individuals, where  $n_k$  is the number of individuals in population  $k$ , regardless of whether the  
 984 individual itself is in the panel.

985

## 986 **Ancestry learning**

987 The target of inference is an admixture profile for each modern and ancient individual. We use the  
 988 first stage of the admixture estimation method as implemented in the software GLOBETROTTER  
 989 <sup>236</sup>. To quantify uncertainty, we resample with replacement the per-chromosome palettes for each  
 990 individual and reapply admixture estimation. We report the average and confidence interval over 100  
 991 random samplings as performed by <sup>236</sup>. Supplementary Table 6 gives the per-individual estimates of  
 992 ancestry.

993 Given that we have performed imputation and the ancient genomes have variable coverage, it is  
 994 important to test how this will effect inference. We first check whether sequence depth is driving any  
 995 broad scale painting structures. Figure S11.7 shows that the results of the Unsupervised Ancient  
 996 Sample Analysis are not associated with sequence depth.

997

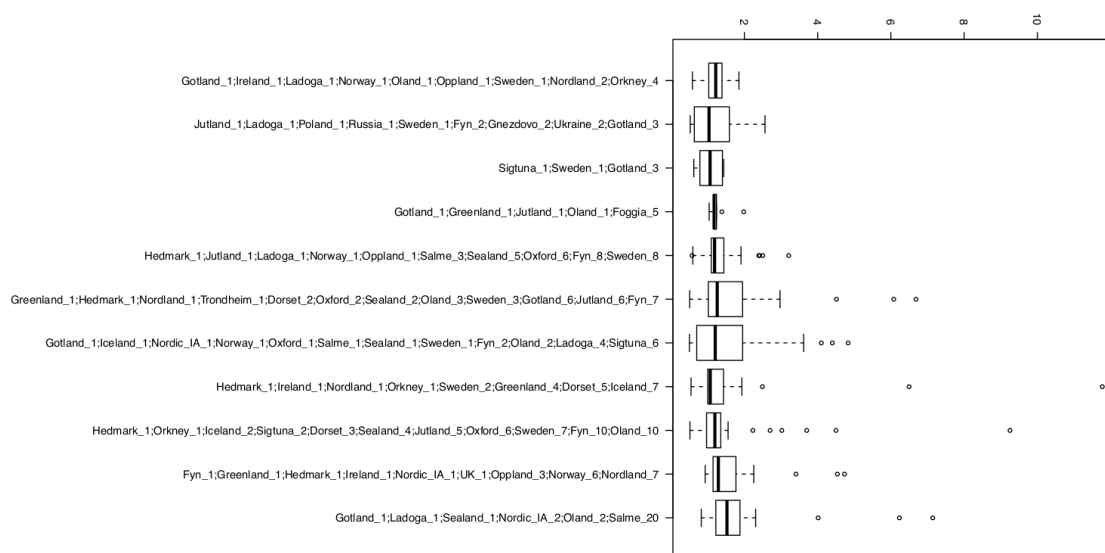

998

999 **Fig. S11.7:** The labels of the individuals in the unsupervised cluster membership (see Unsupervised  
 1000 Ancient Sample Analysis) showing the sequence depth of members. There is no association between  
 1001 membership and sequence depth.

1002

1003   Next we examined the fine-scale effects of sequence depth by downsampling two high quality  
1004   genomes, VK1 (Greenland East Settlement; sequence depth 11.8) and VK50 (Gottland; sequence  
1005   depth 6.2), at the raw read level, to an average sequence depth of 1,2, or 4. We repeat the analysis as  
1006   if this individual were only available at the specified sequence depth. Figure S11.8 shows how the  
1007   inference changes as a function of sequence depth, along with the individual bootstrap samples. In  
1008   general, there is surprisingly little variation as a function of sequence depth, with some evidence that  
1009   1X is biased towards a more mixed solution, but not dramatically worse than the variation induced  
1010   by changing depth. There is no evidence that a) wrong ancestry components are added, or b) major  
1011   changes in ancestry can occur. All changes are within Scandinavian ancestries and the correct  
1012   components are always recovered.

1013



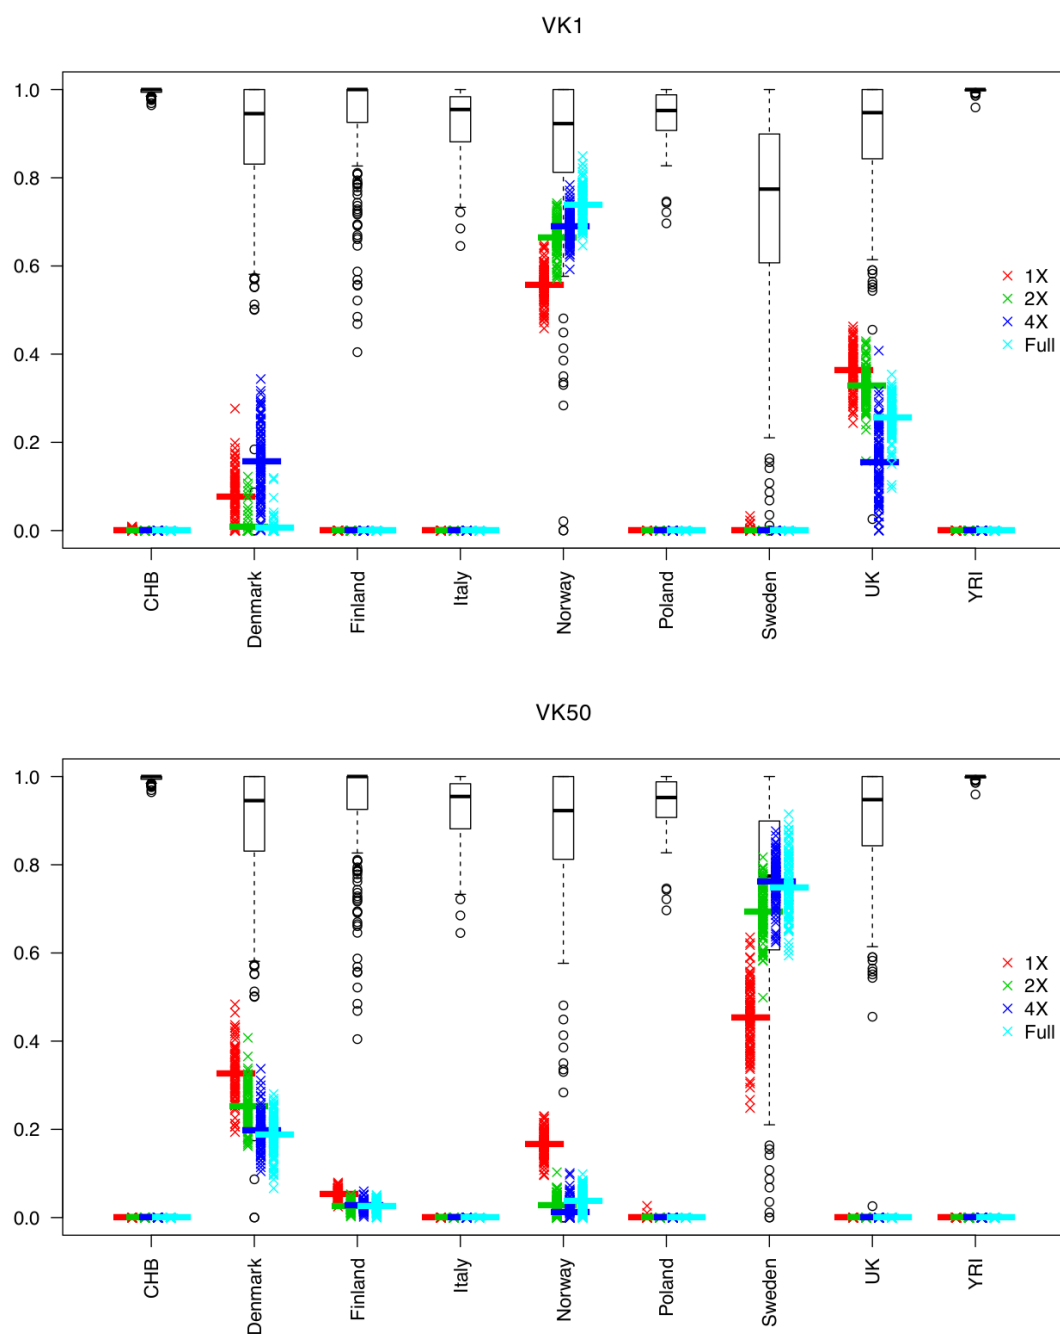

1014  
 1015 **Fig. S11.8:** Top: VK1, Bottom: VK50. The mean results along with 100 bootstrap resamples of the  
 1016 painting are shown for ancestry reconstruction from the 7 populations. Results are shown for each  
 1017 sequence depth (crosses of different colours: red/blue/green/cyan). Also shown is the distribution of  
 1018 each component within the specified population (black boxplots/circles); e.g. the “Denmark” boxplot  
 1019 shows the distribution of Denmark ancestry for individuals from the Denmark population.

## Spatio-temporal Regression Model

To assess the spatio-temporal structure in the data, we use a simple regression model:

$$a_{ik} = \alpha_{jk}t_i + \beta_{jk}x_i + \gamma_{jk}y_i + \varepsilon_{ijk},$$

where  $a_{ik}$  is the amount of ancestry individual  $i$  possesses from population  $j$ ,  $t_i$  is the “age category” of the individual (1=iron age, 2=early Viking, 3= Viking, 4=Medieval) and  $(x_i, y_i)$  are the longitude and latitude of the death location of the individual. We choose to analyse the samples by region, hence restricting to a subset of individuals  $i \in P_r$  found in that region  $r$  (UK, Scandinavia, whole Europe including UK and Scandinavia). The results of the inference are a time-effect  $\alpha_{jk}$ , a longitude effect  $\beta_{jk}$  and a latitude effect  $\gamma_{jk}$ .

We perform time-tests in Scandinavia and Europe, and lat-long tests in Scandinavia, UK, Europe for a total of 8 tests, each run for 7 ancestries.

**Table S11.2:** Regression results for spatio-temporal structure in ancestries. Each row shows the value for a region (named in the columns) of  $\alpha_{jk}$  (for age),  $\beta_{jk}$  (for longitude) and  $\gamma_{jk}$  (for latitude) in the model described in Spatio-temporal Regression Model. Significance thresholds: \*:  $p < 0.05$ , \*\*:  $p < 0.005$ , \*\*\*:  $p < 0.0005$ .

|                | Scandinavia<br>Age | Scandinavia<br>Lat | Scandinavia<br>Long | Europe<br>Age    | Europe<br>Lat    | Europe<br>Long  | UK<br>Lat      | UK<br>Long      |
|----------------|--------------------|--------------------|---------------------|------------------|------------------|-----------------|----------------|-----------------|
| <b>UK</b>      | 0.106              | 0.008              | -0.004              | 0.07*            | 0.008*           | -0.004*         | <b>0.06***</b> | -0.027          |
| <b>Denmark</b> | <b>0.193**</b>     | <b>-0.022***</b>   | -0.003              | 0.073*           | -0.012*          | 2.4e-4*         | -0.022         | <b>0.061**</b>  |
| <b>Sweden</b>  | <b>-0.613***</b>   | -0.001             | 0.001               | <b>-0.374***</b> | <b>0.001***</b>  | <b>0.003***</b> | -0.005         | 0.016           |
| <b>Norway</b>  | <b>-0.173**</b>    | <b>0.037***</b>    | <b>-0.04***</b>     | 0.047            | 0.018            | -0.005          | -0.017         | <b>-0.068**</b> |
| <b>Poland</b>  | <b>0.188***</b>    | -0.007             | <b>0.018**</b>      | 0.069*           | -0.003*          | 0.003*          | -0.001         | 0.003           |
| <b>Italy</b>   | <b>0.136**</b>     | <b>-0.015***</b>   | -0.002              | <b>0.129***</b>  | <b>-0.015***</b> | <b>0.001***</b> | -0.012         | 0.012           |
| <b>Finland</b> | 0.163*             | -0.002             | <b>0.025***</b>     | -0.014           | 0.003            | 0.003           | -0.003         | 0.004           |

1041 Such regression analyses are dependent on the sample locations and choice of geographical region.  
1042 They are therefore intended as a guide to formalise the spatio-temporal relationships that are clear  
1043 by-eye in the maps smoothing ancestry estimates. They are helpful to understand what the inferred  
1044 ancestry components “mean”. The within-Scandinavia results make it clear that the group called  
1045 “Sweden” represents a historical population that once existed in Sweden, replaced by more southern  
1046 population/s containing more continental European ancestry. Similarly, Norwegian ancestry has  
1047 declined but is still higher in the North-West of Scandinavia (i.e. Norway). Italian and Danish  
1048 ancestry both increase over time and are higher in the south of Scandinavia, consistent with a  
1049 migration flow. Similarly, the UK analysis shows that the population labelled “UK” was at the time  
1050 of sampling predominant in the north, with “Danish”-like ancestry found in the East and Norwegian  
1051 in the West.

1052

### 1053 **Principal Components Analysis of Painting**

1054 We perform a Principal Components Analysis of the covariance of the painting which (if the data  
1055 were treated as containing no linkage-disequilibrium) is equivalent under some theoretical conditions  
1056 <sup>235</sup>. Specifically, we formed an  $N_{M+A}$  by  $M$  matrix of the ancient and modern combined palette  
1057 painting, calculate the  $N_{M+A}$  by  $N_{M+A}$  matrix of covariance, and compute the eigenvalue  
1058 decomposition using the function “eigen” in R. Figure S11.9 shows the results of this analysis.

1059

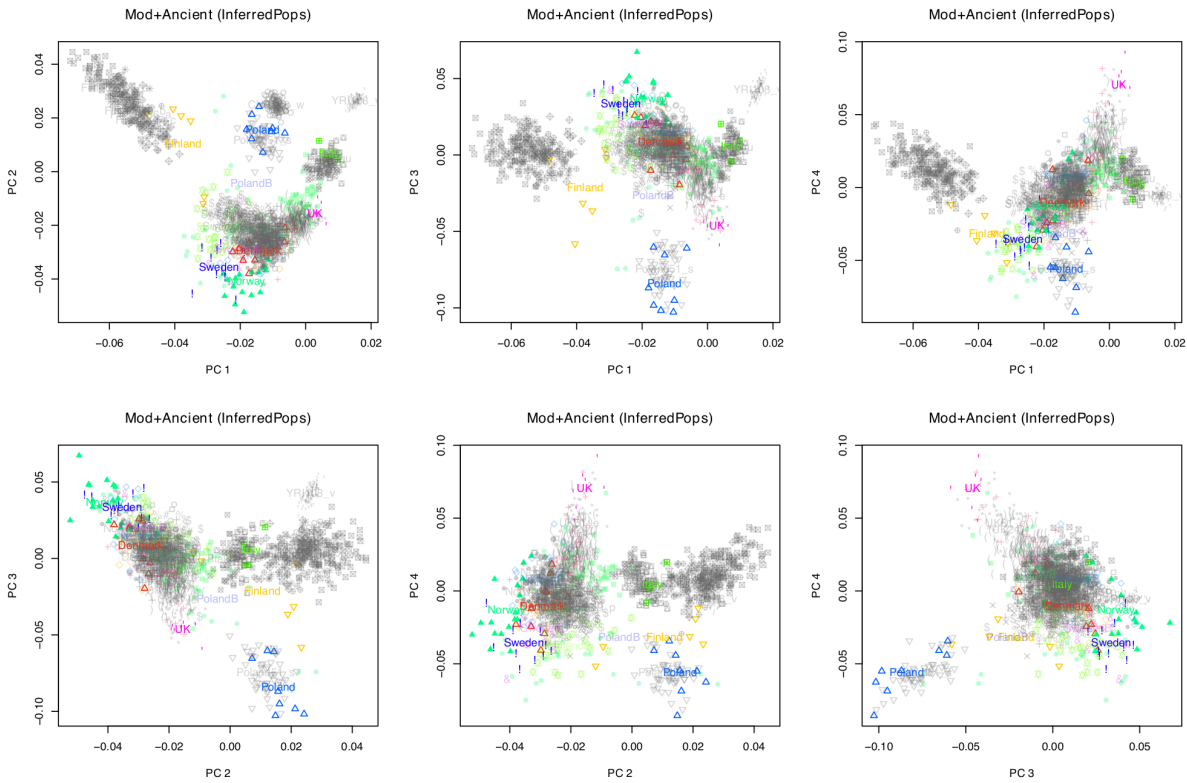

**Fig. S11.9:** PCA of the ancient and modern samples using the ancient palette, showing different PCs. Modern individuals are grey and the  $K=7$  ancient panel surrogate populations are shown in strong colors, whilst the remaining  $M-K=7$  ancient populations are shown in faded colors.

Several features are clear from Figure S11.9. Firstly, modern Finnish individuals are not like ancient Finnish individuals, modern individuals have ancestry of a population not in the reference; most likely Steppe/Russian ancestry, as Chinese are in the reference and do not share this direction. Ancient Swedes and Norwegians are more extreme than modern individuals in PC2 and 4. Ancient UK individuals were more extreme than Modern UK individuals in PC3 and 4. Ancient Danish individuals look rather similar to modern individuals from all over Scandinavia.

By using a supervised ancient panel, we have removed recent drift from the signal, which would have affected modern Scandinavians and Finnish populations especially. This is in general a desirable feature but it is important to check that it has not affected inference. As a sensitivity analysis, we therefore repeated the analysis but this time using the modern and ancient samples together in “all-vs-all mode”, using the same label annotations as above. This leads to a  $N_{M+A}$  by  $N_{M+A}$  “coancestry matrix” which we normalise<sup>235</sup> in the standard way (zero mean rows, standardize variance), before

removing African and Chinese individuals from the rows, so that they are not projected but that their ancestry is represented. We then use the R function “svd” to perform a Singular Value Decomposition (theoretically and practically equivalent to computing the Principal Components). This is shown in Figure S11.10.

As expected, variation in the large modern dataset dominates the picture. Further, the early PCs are dominated by within-population structure. Whilst PC1 describes similarity with Africa for high values, PC2 describes Finnish ancestry, PC3 variation within Finnish ancestry, PC4 describes Norwegian ancestry and PC5 describes variation within Norway at one end of its range. PC8 describes the first batch effect between modern and ancient samples; that it is a relatively small effect compared to the population structure is additional information that the imputation procedure has not biased the inference.

The story for Modern-vs-ancient Finnish ancestry is consistent, with ancient Finns looking much less extreme than the moderns. Conversely, ancient Norwegians look like less-drifted modern Norwegians; the Danish admixture seen through the use of ancient DNA is hard to detect because of the extreme drift within Norway that has occurred since the admixture event. PC4 vs PC5 is the most important plot for the ancient DNA story: Sweden and the UK (along with Poland, Italy and to an extent also Norway) are visibly extremes of a distribution the same “genes-mirror-geography”<sup>4</sup> that was seen in the Ancient-palette analysis. PC1 vs PC2 tells the same story – and stronger, since this is a high variance-explained PC - for the UK, Poland and Italy.

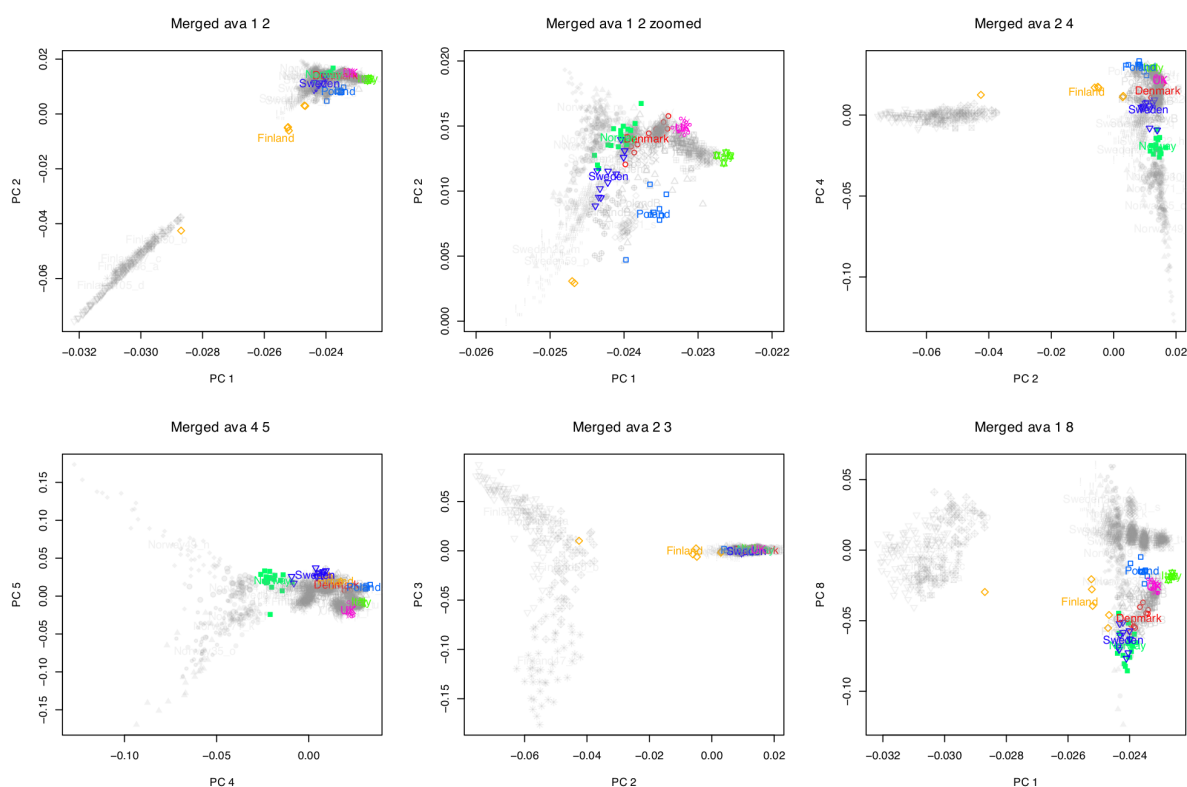

**Fig. S11.10:** PCA of the ancient and modern samples using no palette (see text), showing selected PCs to illustrate the salient features. Modern individuals are grey and the  $K=7$  ancient panel surrogate populations are shown in strong colors.

PCA should be carefully interpreted as it can easily be misleading<sup>3,5</sup>; for example, individuals from very different populations can be mapped to the same location in some PCs if they do not differ in their variation in the directions being displayed. The PCs are also dominated by variance components that represent a large number of individuals (e.g. modern variation), or a few individuals that share a large fraction of the variance (e.g. Finnish). Despite these problems, the PC analysis provides support for the inferences described through the chromosome painting admixture analysis.

## Interpretation: Inference of historical ancestry sharing using Chromosome Painting

The first summary of the data to consider is the population averages of ancestry by population, commonly called the confusion matrix. This is shown in Figure S11.11, which as a sensitivity analysis includes an analysis based on “chunk counts” as used by FineSTRUCTURE as well as the total amount of genome shared, called chunk lengths, on which all other inference is based.

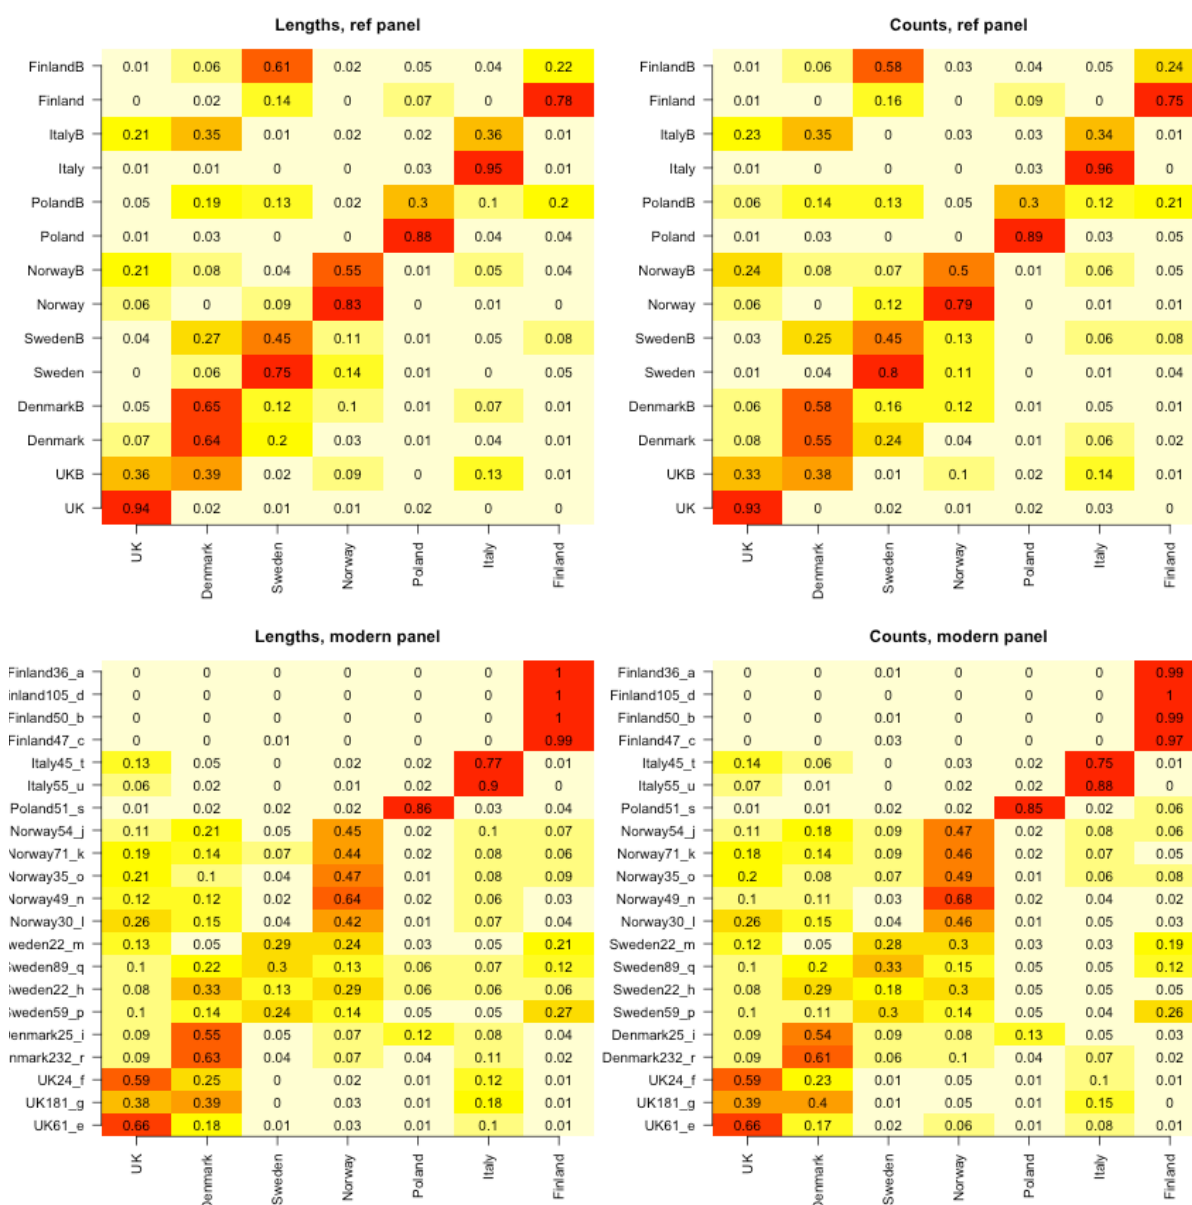

**Fig. S11.11:** Left: results based on inference using the total length of genome shared with individuals from each donor population. Right: results based on inference using the total number of “chunks” (most recent recombination events). Top: ancient panel. Bottom: modern panel.

The general structure of this inference is:

- We can recover the representative donors’ reference populations well.
- Lengths perform slightly better than counts for this problem.
- The populations labelled “B”, who are “non-representative donors”, are always more of a mixture than the “representative donors”.
- Norwegian ancestry is found primarily in Scandinavia, with small amounts in UKB.

- e) Swedish ancestry is found primarily in Sweden and Scandinavia, though is also found in Finland and PolandB.
  - f) UK ancestry is found primarily in the UK but also in the ItalyB and NorwayB populations.
  - g) Denmark ancestry is found in nearly every B population though is lowest in NorwayB and FinlandB.
  - h) Poland ancestry is restricted to Poland and Finland.
  - i) Italy ancestry is found in all B populations and no representative populations.
  - j) Finland ancestry is found in Finland, PolandB and SwedenB only.
- These are inferred populations that were labelled based on which ancestral population “was closest to them”, rather than which they were closest to. Empirically this is symmetric for all cases except FinlandB, who are more related to Sweden than Finland on average.

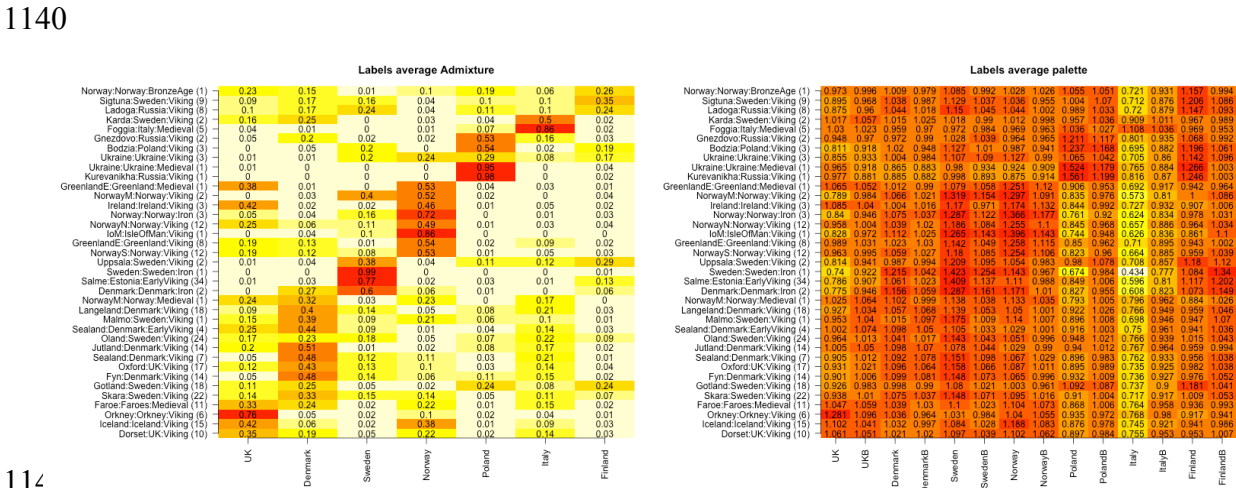

**Fig. S11.12:** Results presented in terms of the labels, which are shown in “Region:Country:Age (sample size)” format. Left: Inferred ancestry. Right: Average painting palettes.

Figure S11.12 shows the same results as Figure S11.11 (for admixture) and Figure S11.6 (for palettes) but presented by labels, that is, the region, country and age of each set of samples. It must be remembered that the individuals concerned were found in heterogeneous locations and where there are multiple individuals, may be heterogeneous genetically. To explore diversity of sites explicitly, we devised a measure of diversity that could characterise highly diverse vs homogeneous sample labels, shown in Extended Data Fig. 5.



For the purpose of characterising diversity there isn't a ready off-the-shelf measure. The data consist of a diversity of probability vectors. We quantify their diversity by computing the average Kullback-Leibler (KL) Divergence for each individual label from the average of that label:

$$D(A^{(l)}) = \frac{1}{n_l} \sum_{i=1}^{n_l} KL(A_i^{(l)} \parallel p^{(l)})$$

where  $A^{(l)}$  is the  $n_l$  by  $K$  matrix of ancestry estimates in label  $l$ ,  $p^{(l)}$  is the length  $K$  vector of average ancestries in that label, and  $KL(Q \parallel P) = \sum_{k=1}^K q_k \log_2 \left( \frac{q_k}{p_k} \right)$ . This therefore measures a population to be “diverse” if there is a large deviation of individual ancestry estimates away from the average ancestry in that population.

We confirm that this score is well-calibrated using simulations. We simulated from a hierarchical dirichlet setup where we make a random “population mean”  $\alpha \sim \text{Dirichlet}(\text{rep}(\alpha_0, K))$  and then sample individuals  $x_i \sim \text{Dirichlet}(\alpha)$ . This is shown in Figure S11.13 (right), with a search of good choices of  $\alpha_0$  (left) being guided by the fit to the data under a normal distribution approximation. This simulation confirms that the diversity measure is appropriate for the data.

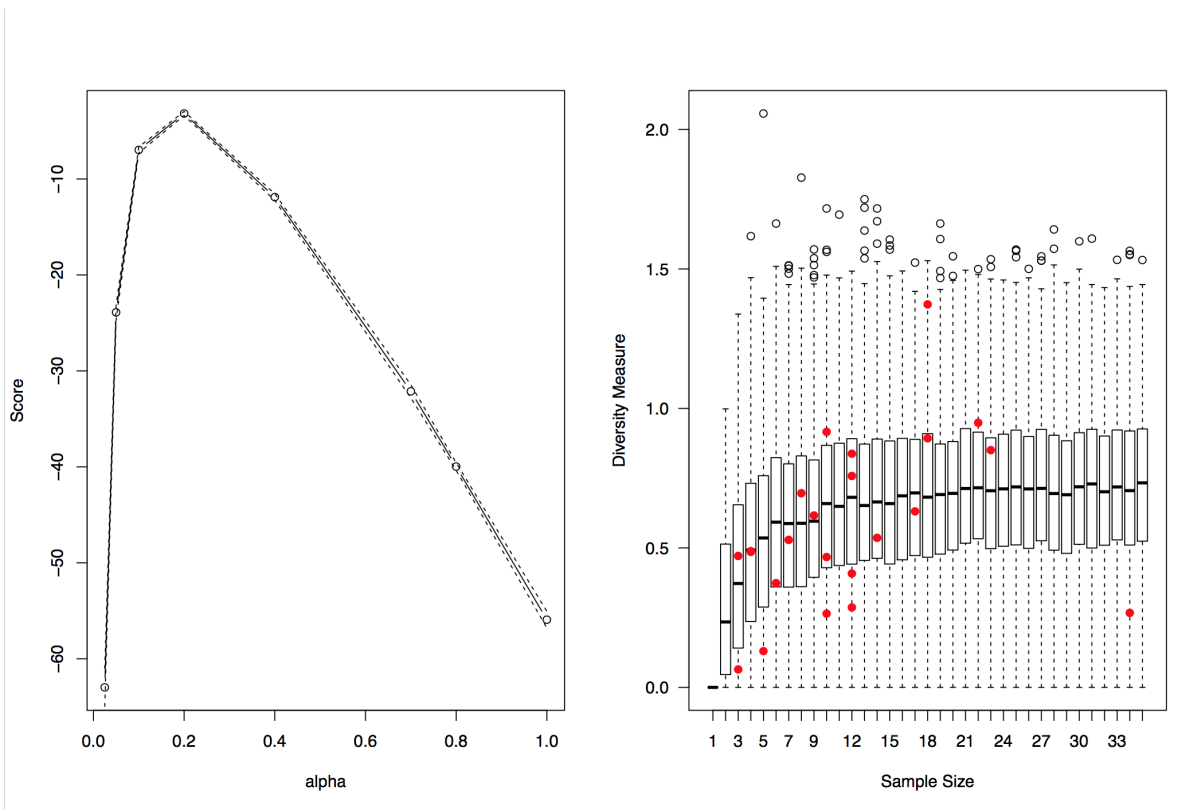

**Fig. S11.13:** Simulated diversity measures for labels. Left: quality of fit of simulations to the data as a function of a tuning parameter  $\alpha_0$  (see text). Right: simulated data (boxplots) and observed data

1169 (red dots) as a function of sample size, to check model fit. Note that the distribution is testing model  
1170 fit, not statistical significance of diversity.

1171

1172 This exploration of diversity raises several points. Firstly, Bodzia (which is associated with our  
1173 ‘Poland’ population), Foggia (associated with our ‘Italy’ population), and Salme (which is associated  
1174 with our ‘Sweden’ population) are relatively homogeneous. Dorset is also homogeneous, containing  
1175 primarily ‘Norway’ or ‘UK’ ancestry.

1176

1177 Extreme diversity is seen in Gotland, a well-known trading location. Other locations such as Skara  
1178 and North Norway are diverse due to the presence of UK, Danish, Swedish and Norway ancestry.  
1179 The overall picture is of high-diversity - and high heterogeneity - in Scandinavia, brought in from  
1180 outside. Sampling must be considered for the peripheral regions, which were sampled to target Viking  
1181 cultural burial.

1182

### 1183 **Modern Interpretation: Inference of historical ancestry sharing using** 1184 **Chromosome Painting**

1185 The estimates in Figure S11.11 of ancestry in modern populations from historical populations is a  
1186 mean, and therefore does not separate ancestry contributions from recent admixture from that which  
1187 is typical of the population. The median is not affected by some individuals with relatively recent  
1188 ancestry, but instead produces estimates that do not sum to 1. To estimate ancestry of populations,  
1189 we therefore consider the *spatial median* of the individual ancestry estimates using the R package  
1190 “ICSNP”<sup>237</sup>, which is a multivariate extension of the median that preserves the sum.

1191

1192 We estimate confidence intervals by resampling individuals with replacement within each population  
1193 and recomputing the spatial median. We report the 95% confidence range (2.5% and 97.5%  
1194 quantiles).

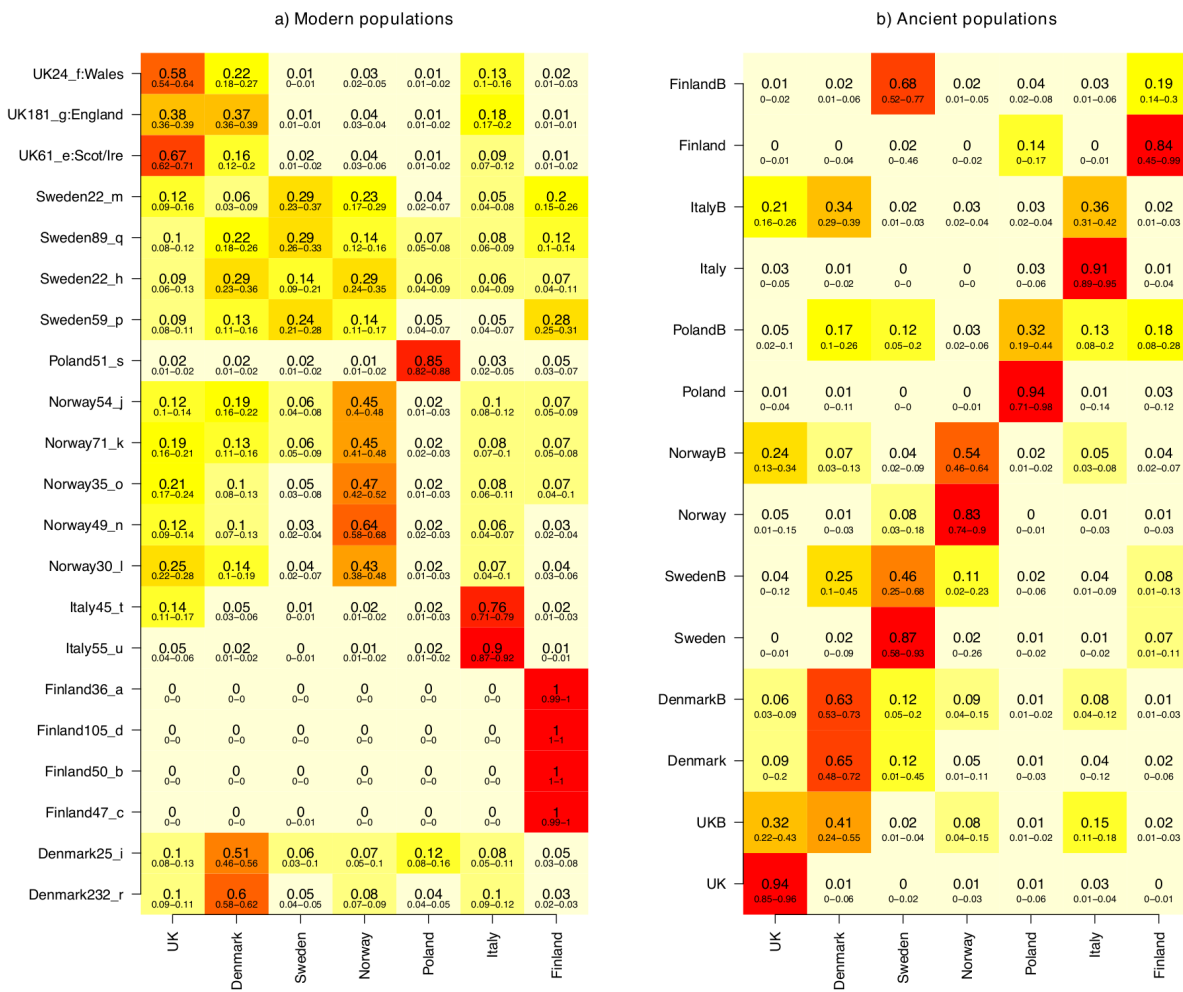

**Fig. S11.14:** Population-based admixture estimates based on the spatial median, as described in the text. a) estimates of the proportion of ancient populations in modern populations. b) estimates of the proportion of ancient populations in ancient samples.

Figure S11.15 shows our best estimates for modern populations, and the ancient sample groupings, based on this spatial median approach. The ancient reference populations are all seen as broadly their own population. The ancient non-reference populations may not be meaningful as they are not expected to be homogenous. However, the modern populations are relatively homogeneous and the spatial median should represent the typical individual from these populations.

From this, we can see the spread of ancestry during and around the Viking era:

- UK populations have all received high ‘Denmark’ ancestry. Although Anglo-Saxon and Danish Viking ancestry are hard to distinguish, Viking-era Danes have too much “Sweden”

ancestry to have contributed more than around 6% ancestry into England, whereas they could plausibly have contributed all (up to 16%) of the Scottish and Irish signal. Anglo-Saxon samples are needed to explore this further.

- The ‘Norway’ ancestry signal in the UK cannot be explained via the Danish or Anglo-Saxon contribution. These fractions (4% in England, Scotland, and Ireland, 3% in Wales) likely correspond to the Norwegian Viking legacy in Britain.
- Modern UK individuals contain around 9-18% ‘Italian’ ancestry, plausibly associated with the Normans and associated increase in population movement during that era. This is a two-way process, with high fractions of the ‘UK-like’ ancestry in a sub-population of Italians.
- Modern Norwegians are structured by their proportion of ‘UK’ and ‘Danish’ ancestry.
- Modern Swedes are structured by a ‘Finland’-like group, a ‘Denmark’+‘Norway’ group, and a ‘UK’ group.
- Modern Danes are structured into high and low ‘Polish’ ancestry groups, both with similar amounts of ‘Norway’ and ‘UK’ ancestry, suggesting that these admixtures occurred earlier. Indeed, the ancient panel implies that this process started in the Viking era, where the high confidence interval is explained by high inter-individual variation.

To understand the biases involved in the use of spatial.median we plot the estimates from this procedure compared to the individual data in Figure S11.15. From this it is clear that small estimates are biased upwards from the sample median for each ancestry, due to the constraint that ancestries should sum to 1. This has been accounted for in the discussion above.

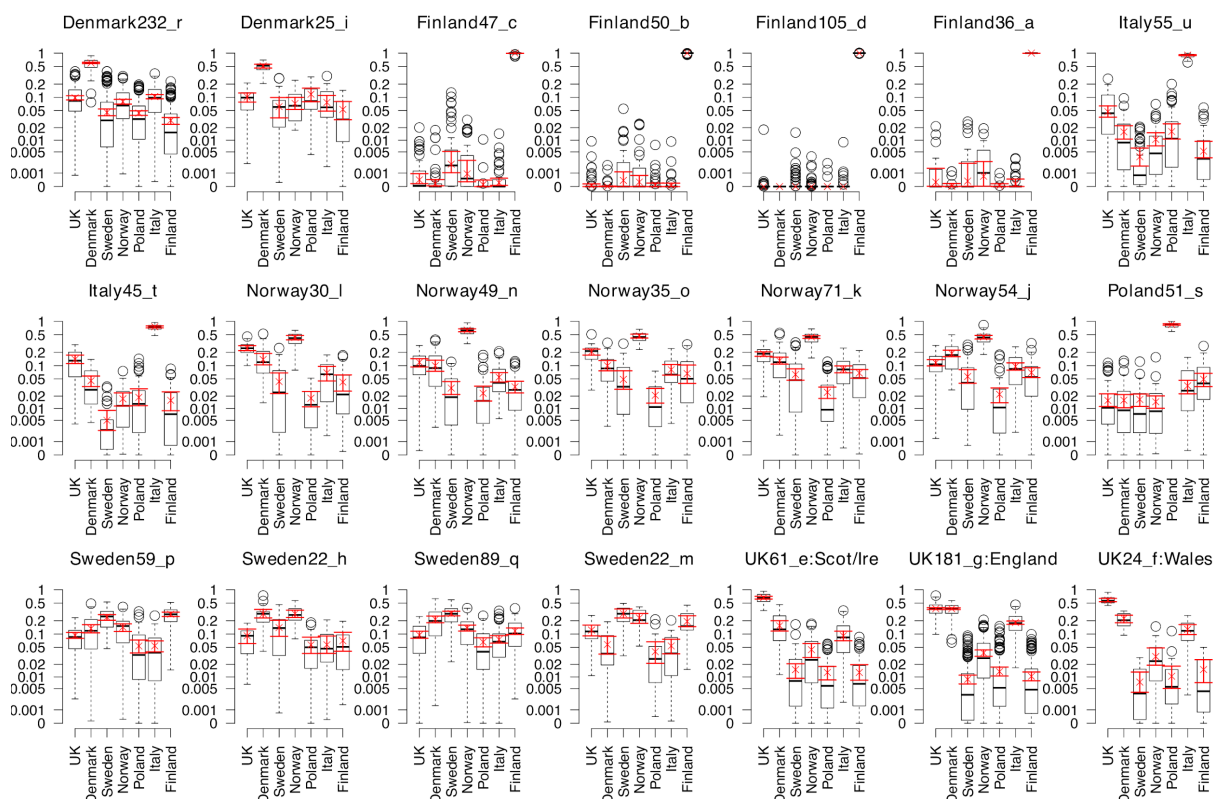

**Fig. S11.15:** Spatial median estimates (red; crosses for best estimate with range shown) and individual estimates (black; reported as a boxplot) for each modern population using the 7 ancient reference populations. Black horizontal bars denote the median for each sample.

## Evidence for Pictish Genomes

Our interpretation for the Orkney samples can be summarised as follows. Firstly, they represent “native British” ancestry, rather than an unusual type of Scandinavian ancestry. Secondly, that this “British” ancestry was found in Britain before the Anglo-Saxon migrations. Finally, that in Orkney, these individuals would have descended from Pictish populations. The evidence for this interpretation is:

1. In Figure S11.10 showing modern and ancient samples painted together and analysed using PCA without any supervision, the ‘UK’ cluster is outlying far from Scandinavia in PC1-2 and PC4-5, and PC3 is describing drift inside modern Finland.
2. In Figure S11.9 showing modern and ancient samples painted together and analysed using PCA after projection into our supervised clusters, the ‘UK’ cluster is further outlying. In PC1-

- 3 it clusters with nothing but is closest to ‘Italy’ and ‘Poland’. In PC4 it is an extremal point opposite Poland and Finland.
3. In Figure S11.3 showing ancient individuals painted against modern populations, the Orkney individuals best match modern Scottish populations (UK61\_e), and show no particular affinity to modern Scandinavian ancestry. In Figure S11.4 showing the importance of modern populations for ancient samples, the modern UK populations do not well describe this variation.
  4. In Figure S11.6a-b showing the painting of ancient population clusters against one another, the UK population is rarely used to describe Scandinavians (low values in the ‘UK’ column), whereas the Italians do. Conversely, the ‘UK’ population does use an excess of Norway ancestry, implying a degree of contemporary admixture into that population (likely due to low sample sizes of unadmixed individuals).
  5. In Figure S11.6c-d showing the painting of modern population clusters against ancients, the Irish and Scottish (UK61\_e) and Welsh (UK24\_f) populations receive the most ‘UK’ ancestry. This is followed by Italy, and then some Norwegian subpopulations into which British is known to have been taken.
  6. In Figure S11.11 showing the inferred ancestry of ancient populations, ‘UK’ ancestry is little seen in other main clusters, and appears in known admixtures including ‘NorwayB’ and ‘ItalyB’.
  7. In Figure S11.12 showing the inferred ancestry of ancient sampling locations, the ‘UK’ ancestry is found at highest proportions in Orkney, Iceland, Ireland, Dorset in England, and Medieval Faroe Islands.
  8. Conversely, of the 10 individuals with more than 80% ‘UK’ ancestry (Supplementary Table 6) only 4 are in Orkney and 1 in Ireland. The rest are in Scandinavia during the Viking period: Norway (VK386, VK525, VK528) and Sweden (VK456, VK405). These populations are sampled more heavily and the overall rate of ‘UK’ ancestry in those locations is low. This is consistent with the migration of individuals with ‘UK’ ancestry into Scandinavia, rather than a population present in Scandinavia.
  9. In Figure S11.14-15 showing modern admixture estimates, the “UK” fraction is ordered: Scotland and Ireland, Wales, England, Norway30\_1, rest of Norway, Northern Italy, Denmark and Sweden. This shows that this ancestry is located in the UK today, though widely

distributed throughout Europe. Note that we have not shown whether the signal in Italy is due to post-Viking era admixture, or a signal of ancient population structure.

Therefore ‘UK’ represents a group from which modern British and Irish people all receive an ancestry component. This information together implies that within the sampling frame of our data, they are proxying the ‘Briton’ component in UK ancestry; that is, a pre-Roman genetic component present across the UK. Given they were found in Orkney, this makes it very likely that they were descended from a Pictish population.

Modern genetic variation within the UK<sup>199</sup> sees variation between ‘native Briton’ populations Wales, Scotland, Cornwall and Ireland as large compared to that within the more ‘Anglo-Saxon’ English. This is despite subsequent gene flow into those populations from English-like populations. We have not attempted to disentangle modern genetic drift from historically distinct populations. Roman-era period people in England, Wales, Ireland and Scotland may not have been genetically close to these Orkney individuals, but our results show that they have a shared genetic component as they represent the same direction of variation.

## **Supplementary Note 12 - Spatiotemporal patterns of ancestry in the Viking World**

1298

1299 We used ordinary kriging implemented in the function ‘idw’ of the R package *gstat*, to interpolate  
1300 the proportion of each ancient genome that was attributed by our *fineStructure* analysis to one of the  
1301 pre-defined ancestry groups: ‘UK’, ‘Denmark’, ‘Norway’, ‘Sweden’, ‘Italy’, ‘Poland’ and ‘Finland’.

1302

1303 We chose to plot a Europe-wide map - including Greenland - (Figure S12.1) and smaller maps of  
1304 particular regions of interest: Scandinavia (Figures S12.2-S12.4), the British Isles (Figure S12.5) and  
1305 the Baltic region (Figure S12.6). For Europe-wide maps, we used a grid size of  $0.2^\circ \times 0.2^\circ$ . For all  
1306 other maps, we used a grid size of  $0.1^\circ \times 0.13^\circ$ . As our densest temporal sampling was for  
1307 Scandinavia, we made separate Scandinavian maps for the Iron Age (Figure S12.2), the Early Viking  
1308 Age (Figure S12.3) and the Viking Age (Figure S12.4). For all other maps, we combined samples  
1309 across time periods, but the vast majority of our samples were from the Viking Age, so our signal  
1310 was dominated by this particular period: we only have Viking Age samples from the British Isles,  
1311 while for the Baltic region we only have Viking and Early Viking Age samples.

1312

1313

1314



1315

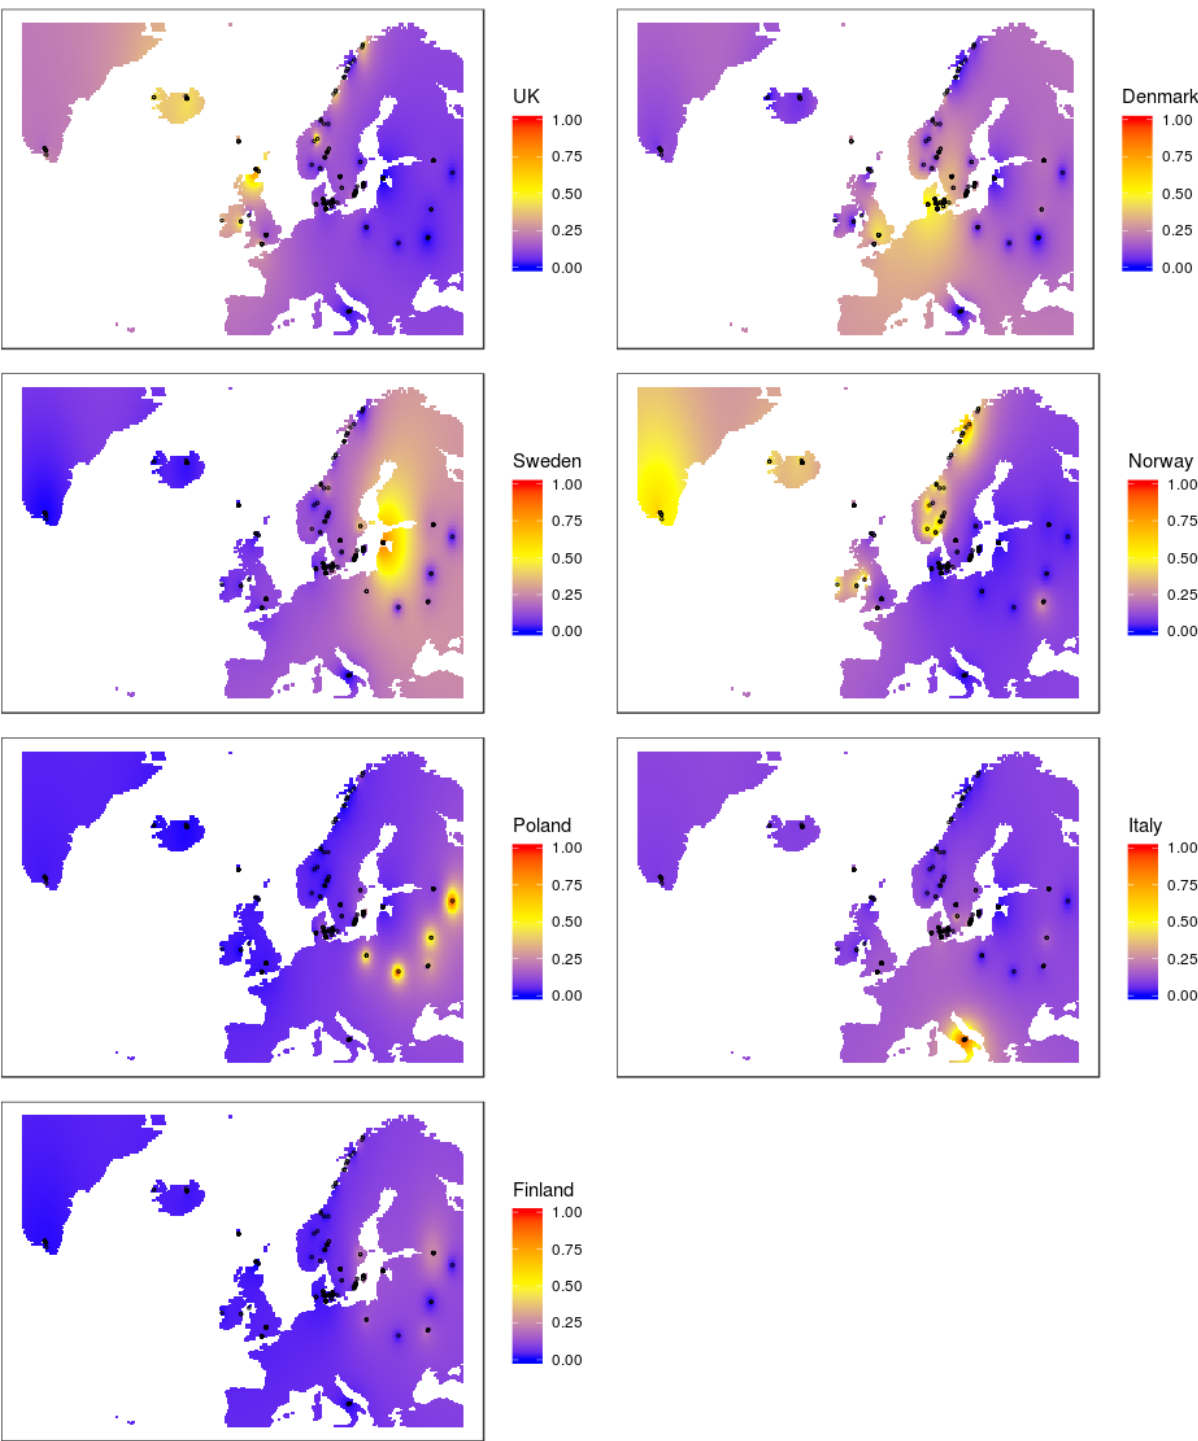

1316

1317

1318

1319

**Fig. S12.1:** Maps of interpolated *fineStructure* ancestries for Europe and Greenland, combining Iron Age, Early Viking Age and Viking Age samples.

1320

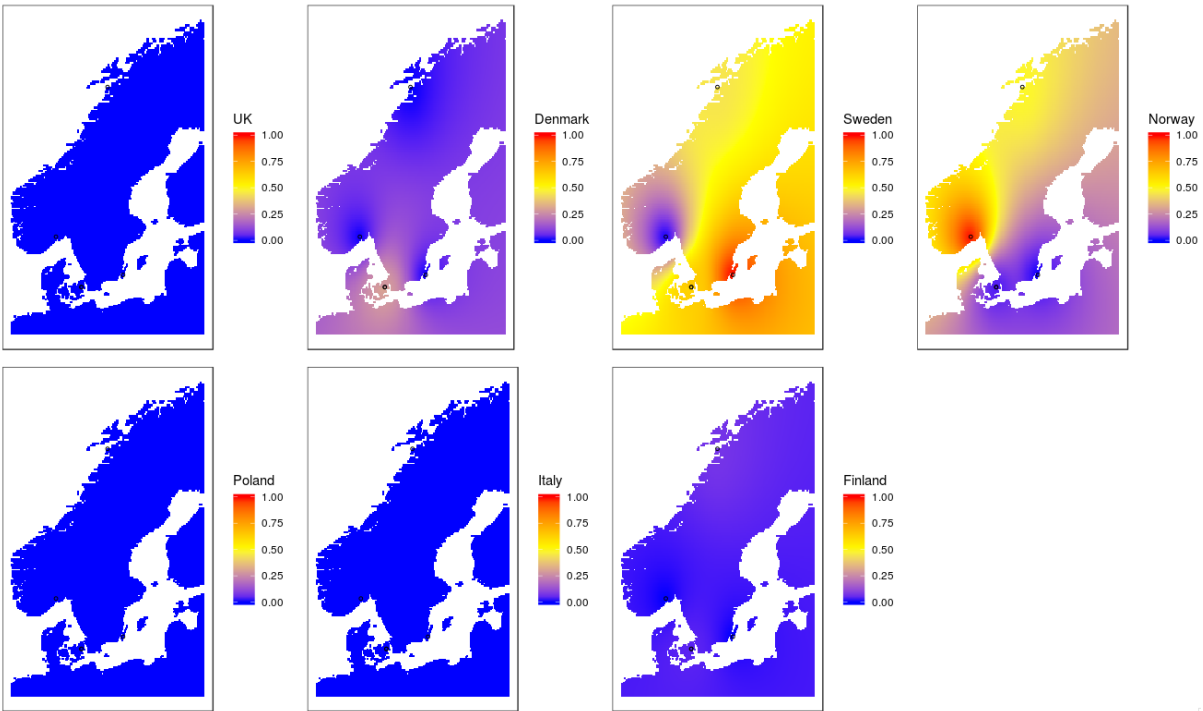

1321

1322

**Fig. S12.2:** Maps of interpolated *fineStructure* ancestries for Scandinavian Iron Age samples.

1323

1324

1325

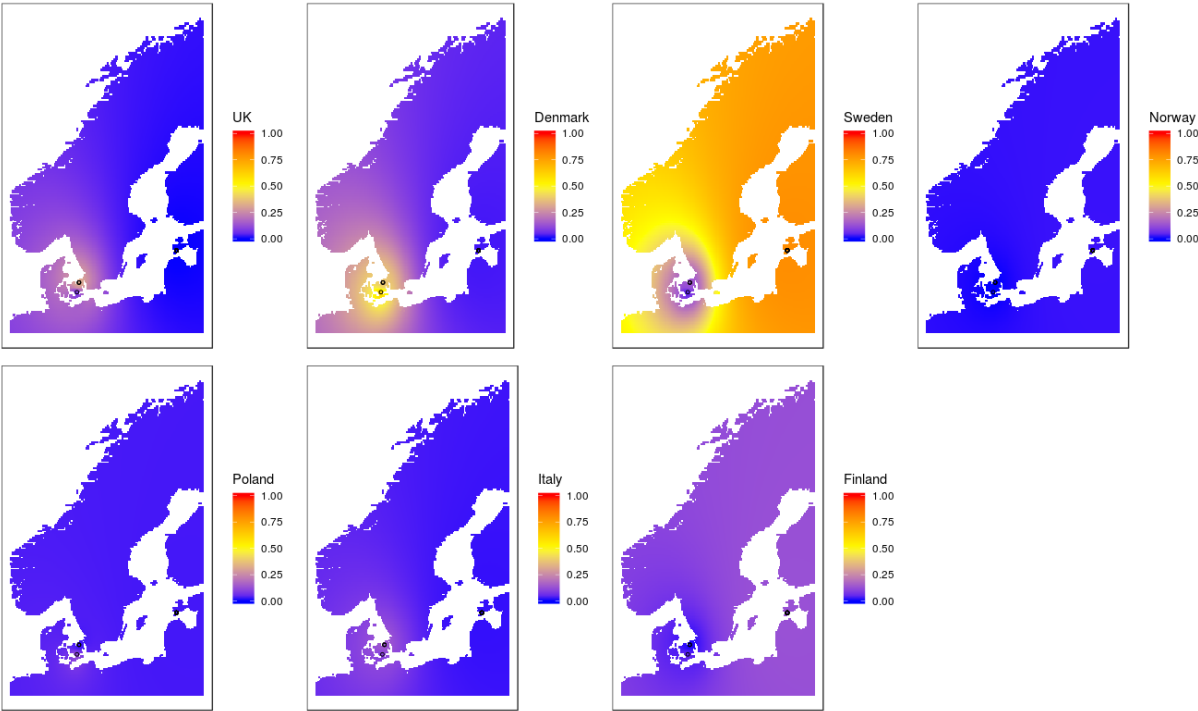

1326

1327

1328

1329

1330

**Fig. S12.3:** Maps of interpolated *fineStructure* ancestries for Scandinavian Early Viking Age samples.

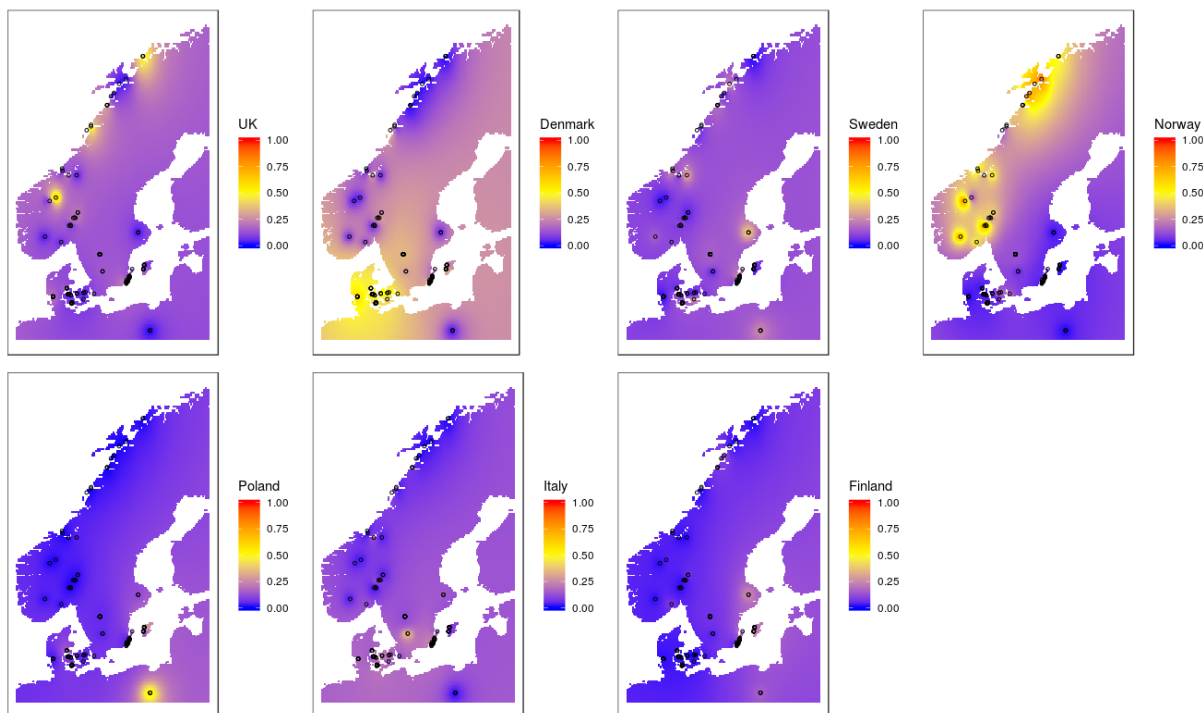

1331

1332

**Fig. S12.4:** Maps of interpolated *fineStructure* ancestries for Scandinavian Viking Age samples.

1333  
1334

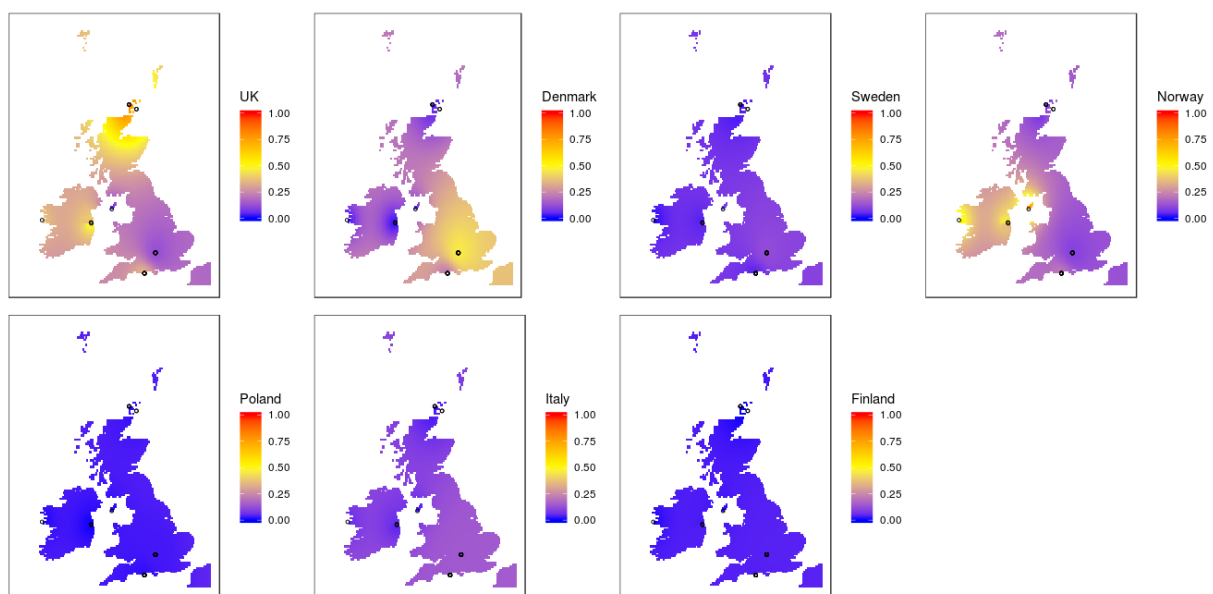

1335  
1336  
1337  
1338  
1339

**Fig. S12.5:** Maps of interpolated *fineStructure* ancestries for Viking Age samples from the British Isles.

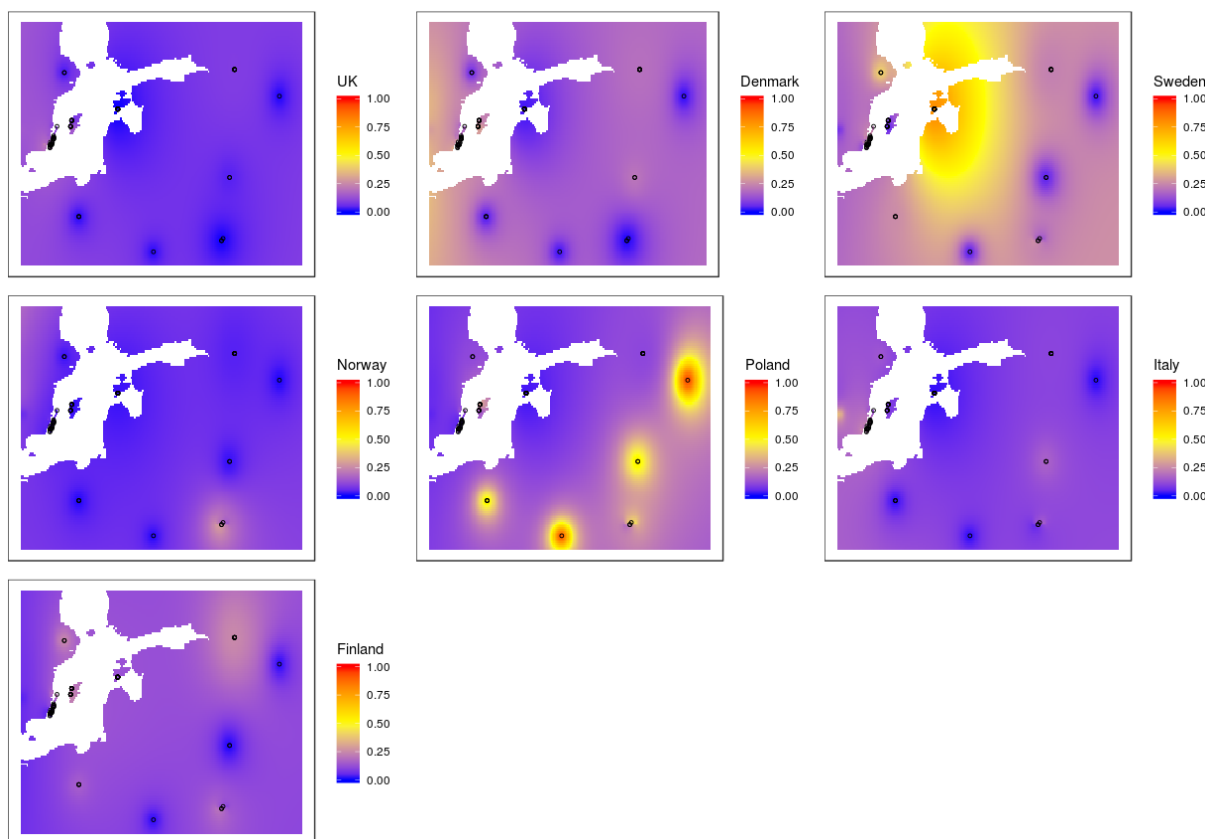

**Fig. S12.6:** Maps of interpolated *fineStructure* ancestries for Early Viking and Viking Age samples from the Baltic region.

## 1346 **Supplementary Note 13 - Lactase persistence and pigmentation SNPs**

1347

### 1348 **Lactase persistence**

1349 To investigate the level of lactase persistence in the ancient population we estimated the derived ‘A’  
1350 allele frequency of the SNP rs4988235 known to affect expression of the lactase LCT gene. The  
1351 ancestral “G” allele is responsible for lactase intolerance in adult Europeans<sup>238</sup>. Since most of the  
1352 ancient samples were sequenced at low depth of coverage, the ANGSD software package was used  
1353 to estimate the allele frequencies of the ancient population based on the genotype likelihood data. We  
1354 used the five European populations (CEU – Northern European, FIN – Fins, GBR – British, TSI –  
1355 Italy, IBS – Spain) and two outgroups (Yoruba – YRI; Chinese – CHB) from the 1000 Genomes  
1356 Project as comparative groups as well as the modern Danish population from the IPSYCH case-cohort  
1357 study<sup>239</sup>. The results are presented in Figure 5.

1358

### 1359 **Pigmentation**

1360 Having a large number of ancient individuals allowed us to assess the frequencies of SNPs  
1361 responsible for pigmentation phenotypes of the ancient dataset (Vikings) at population level. For this  
1362 analysis we have used ancient individuals from the whole Vikin Age period (i.e. Early Viking Age +  
1363 Viking Age) from Scandinavia (n=262).

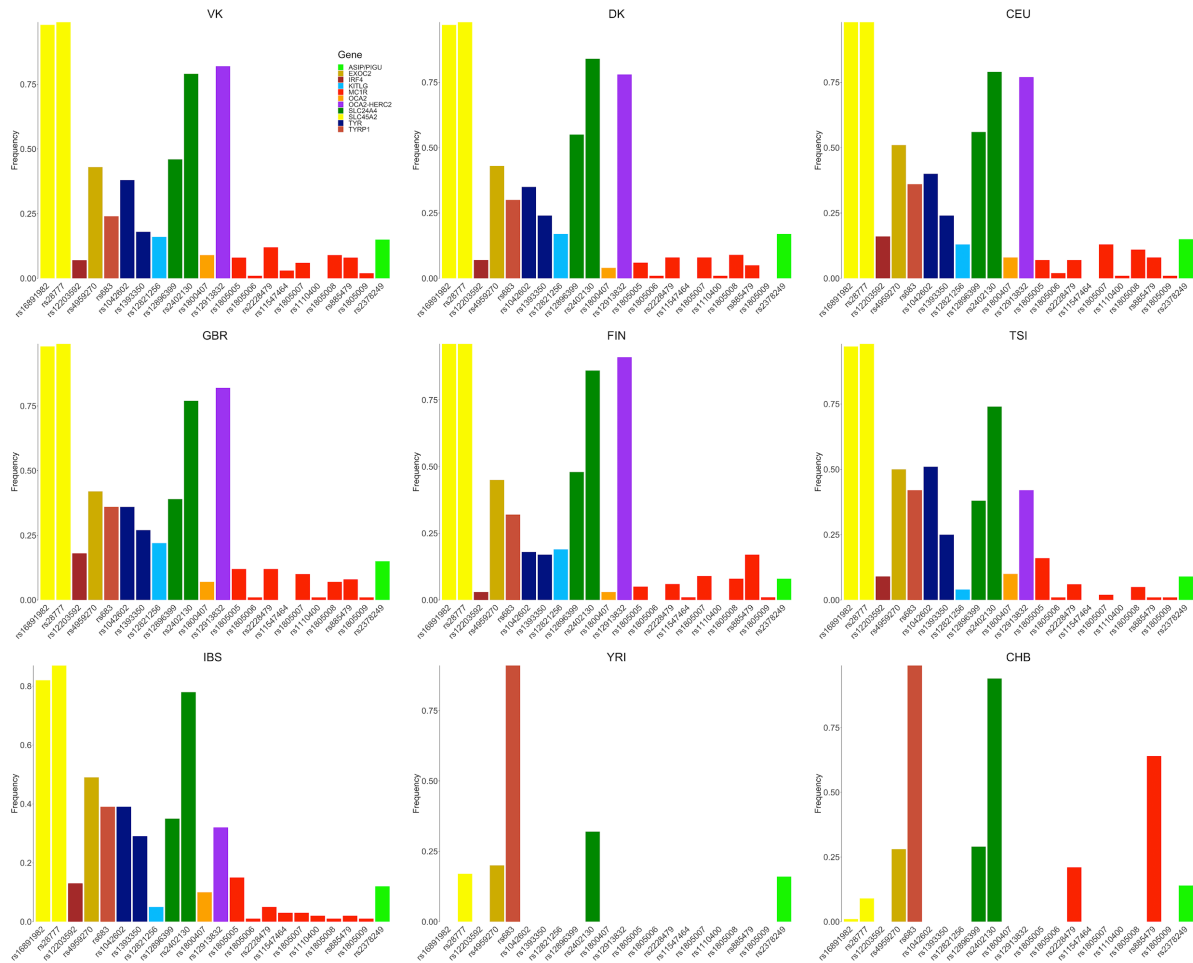

**Fig. S13.1:** The frequencies of derived SNPs with strongest influence on human pigmentation phenotype in Viking (“VK”) and comparative groups. The rs IDs of the SNPs are indicated on the X axis. The genes that contain these SNPs are mentioned in the figure legend. Eight additional populations are also included for comparison: CEU, FIN, GBR, TSI, IBS; YRI; CHB from the 1000 Genomes project and “DK” representing the modern Danish population from IPSYCH case-cohort study.

The SNPs with strongest association with lighter hair and eye pigmentation phenotypes such as the ones in *HERC2*, *OCA2* and *TYR* genes in humans are elevated in the Viking population, and the profile of allele frequency distribution is close to the present-day Northern European population represented here by the “CEU” (1000 Genomes Project) and the modern Danish population (“DK”) from IPSYCH case-cohort study. The frequencies of informative SNPs associated with pigmentation are presented in Figure S13.1.



1379 This suggests that the genetic profile of pigmentation SNPs we observe in northern Europeans today  
1380 had been largely formed at the onset of the Viking period.

1381

1382 We have applied the HIrisPlex<sup>240</sup> model to predict the hair and eye colour for two ancient individuals  
1383 with highest average sequencing depth of coverage, i.e. VK1 and VK42. We used imputed genotypes  
1384 for both individuals.

1385

1386 **Table S13.1:** The list of SNPs used for the HIrisPlex model for the VK1 and VK42 samples.

1387

| Chromosome | Pos      | SNP ID     | Gene                     | Ref | Alt | VK1 | VK42 |
|------------|----------|------------|--------------------------|-----|-----|-----|------|
| 5          | 33951693 | rs16891982 | SLC45A2                  | C   | G   | G/G | G/G  |
| 5          | 33958959 | rs28777    | SLC45A2                  | C   | A   | A/A | A/A  |
| 6          | 396321   | rs12203592 | IRF4                     | C   | T   | C/C | C/C  |
| 6          | 457748   | rs4959270  | EXOC2-<br>LOC105374875   | C   | A   | C/C | C/A  |
| 9          | 12709305 | rs683      | TYRP1                    | C   | A   | A/A | A/A  |
| 11         | 88911696 | rs1042602  | TYR                      | C   | A   | C/A | C/A  |
| 11         | 89011046 | rs1393350  | TYR                      | G   | A   | G/G | G/G  |
| 12         | 89328335 | rs12821256 | KITLG                    | T   | C   | T/T | T/T  |
| 14         | 92773663 | rs12896399 | SLC24A4-<br>LOC105370627 | G   | T   | G/G | T/T  |
| 14         | 92801203 | rs2402130  | SLC24A4                  | G   | A   | A/A | A/A  |
| 15         | 28230318 | rs1800407  | OCA2                     | C   | T   | C/C | C/C  |
| 15         | 28365618 | rs12913832 | HERC2                    | A   | G   | G/G | A/A  |
| 16         | 89985844 | rs1805005  | MC1R                     | G   | T   | G/G | G/G  |
| 16         | 89985918 | rs1805006  | MC1R                     | C   | A   | C/C | C/C  |
| 16         | 89985940 | rs2228479  | MC1R                     | G   | A   | G/A | G/G  |
| 16         | 89986091 | rs11547464 | MC1R                     | G   | A   | G/G | G/G  |

|           |          |           |           |   |   |     |     |
|-----------|----------|-----------|-----------|---|---|-----|-----|
| <b>16</b> | 89986117 | rs1805007 | MC1R      | C | T | C/C | C/C |
| <b>16</b> | 89986130 | rs1110400 | MC1R      | T | C | T/T | T/T |
| <b>16</b> | 89986144 | rs1805008 | MC1R      | C | T | C/C | C/C |
| <b>16</b> | 89986154 | rs885479  | MC1R      | G | A | G/A | G/G |
| <b>16</b> | 89986546 | rs1805009 | MC1R      | G | C | G/G | G/G |
| <b>20</b> | 33218090 | rs2378249 | ASIP-PIGU | G | A | G/A | A/A |

1388

1389 Table S13.1 summarizes the genotypes of each of the 22 SNPs used for phenotype analysis. For VK1  
1390 individual: the estimated probability of having blue eyes was 0.85, while the hair color probabilities  
1391 were blond (0.63), brown (0.29), red (0.01) and black (0.07). For VK42 individual: the estimated  
1392 probability of having brown eyes was 0.98, while the hair color probabilities were blond (0.15),  
1393 brown (0.6), red (0.001) and black (0.25).

1394

1395

## **Supplementary Note 14 - Finding signatures of selection in Europe in the past ten millennia**

### **Introduction**

We aimed to find SNPs whose allele frequencies changed significantly in the last 10,000 years, using our ancient human genomes to look at the frequencies of alleles in the past. We combined our VA and IA genomes with previously published present-day, Bronze Age, Neolithic and Mesolithic sequence data typed at the Human Origins array (see Supplementary Note 6). We filtered for genomes that were younger than 10,000 BP and that were located within a bounding box encompassing the European continent:  $30 < \text{latitude} < 75$  and  $-15 < \text{longitude} < 45$ . We then used neoscan in Ohana<sup>241,242</sup> to scan for variants whose allele frequencies were strongly associated with time, after controlling for genome-wide changes in ancestry that might have also occurred over time. We only analyzed sites with a minor allele frequency  $> 1\%$ .

### **Methods**

Briefly, Ohana works by modelling the allele frequencies across a specific number (K) of ancestry components via a multivariate Gaussian distribution. Each genome is modeled as a mixture of 1 or more components. For more details, see Cheng et al.<sup>241,242</sup>. After genome-wide ancestry component estimation via qpas, the neoscan method implemented in Ohana<sup>243</sup> tests a model in which the frequency of an allele at a site is determined by the genome-wide-estimated ancestry components against a model in which the frequency is also influenced by a free parameter (alpha) that determines the dependence of this frequency on the time at which a genome was sampled. Thus, at each SNP, neoscan computes a log-likelihood ratio that is equal to  $2 \cdot (\text{best local log likelihood} - \text{global log likelihood})$ . The global log likelihood is:

$$H_0 : \ln(L_j) = \sum_i \left( g_{ij} \cdot \ln \left( \sum_k^K (q_{ik} \cdot f_{kj}^{\text{est}}) \right) + (2 - g_{ij}) \cdot \ln \left( \sum_k^K (q_{ik} \cdot (1 - f_{kj}^{\text{est}})) \right) \right)$$

In turn, the local log likelihood is:

$$H_a : \ln(L_j) = \sum_i \left( g_{ij} \cdot \ln \left( \sum_k^K (q_{ik} \cdot f_{kj}^{\text{alt}_i}) \right) + (2 - g_{ij}) \cdot \ln \left( \sum_k^K (q_{ik} \cdot (1 - f_{kj}^{\text{alt}_i})) \right) \right)$$
$$f_{kj}^{\text{alt}_i} = \min \left( 1, \max \left( 0, f_{kj}^{\text{est}} + \alpha \cdot \frac{(t_i - t_{\text{ave}})}{t_{\text{ave}}} \right) \right)$$

The notation here follows from Cheng et al.<sup>241</sup>. I is the total number of sites.  $g_{ij}$  is the called genotype for individual i at SNP j, where 0 is homozygous major, 1 is heterozygous, and 2 is homozygous

1425 minor.  $q_{ik}$  is the estimated genome-wide proportion of ancestry from component  $k$  in individual  $i$ .  $f_{kj}$   
1426 is the estimated frequency in component  $k$  at site  $j$ . The local log likelihood is maximized with respect  
1427 to the parameter  $\alpha$ , which interacts with the time of sampling of individual  $i$  ( $t_i$ ) normalized by  
1428 the average of all the sampling times ( $t_{ave}$ ). This means that SNPs that are not well-modeled by the  
1429 genome-wide mixture of ancestries, and whose deviations from this mixture depend strongly on time,  
1430 will have large likelihood ratios.

1431  
1432 Sampling times were set as 2000 before present (BP) for all Iron Age samples, 1200 BP for all Early  
1433 Viking Age samples, 1000 BP for all Viking Age and Early Norse samples, 750 BP for all Medieval  
1434 and Norse samples, and 500 BP for all Late Medieval samples. The sampling times for all other  
1435 ancient published samples were obtained from the midpoint of their radiocarbon date range. In our  
1436 final scan, we used  $K=3$ , but also verified that our top candidate SNPs were largely robust to the  
1437 choice of  $K$ , by repeating the analysis with higher  $K$ , ranging from 4 to 7. The resulting likelihood  
1438 ratios for all genotyped SNPs in the autosomes are displayed in Figure S14.1.

1439  
1440 We call the above described scan the ‘general’ scan (Figure S14.2, Table S14.1), but we also  
1441 performed two additional scans, focusing on either ‘ancient’ positive selection (older than 4000 BP,  
1442 Figure S14.5, Table S14.2) or ‘recent’ positive selection (younger than 4000 BP, Figure S14.8, Table  
1443 S14.3). For the recent scan, we set all times older than 4000 BP to be equal to 4000 BP, so that ancient  
1444 selection would not affect the local log-likelihood. Conversely, for the ancient scan, we set all times  
1445 younger than 4000 BP to be equal to 4000 BP.

1446  
1447 For each analysis, we selected candidate SNPs whose log-likelihood ratio was larger than the 99.9%  
1448 empirical quantile of the genome-wide distribution of log-likelihood ratios, and that had at least two  
1449 nearby SNPs (in a  $\pm 500$ kb region) that had a ratio score larger than the same quantile. We note,  
1450 however, that because we are working with a dataset intersected with the Human Origins SNPs, the  
1451 highest scoring SNP in a given region may not be the causal one, as the latter may have not been  
1452 selected for SNP capture. We plotted allele frequency time series for candidate SNPs (Figures S14.3,  
1453 S14.6, S14.9 for the “general”, “ancient” and “recent” scans, respectively), grouping ancient genomes  
1454 into five different periods: a period ranging from 10,000 to 8,000 BP, one ranging from 8,000 to 6,000  
1455 BP, one ranging from 6,000 BP to 4,000 BP, one ranging from 4,000 BP to 2,000 BP, one ranging  
1456 from 2,000 BP to the present (excluding present-day samples) and one containing present-day

1457 samples only. We used Jeffreys priors to obtain 95% Bayesian credible intervals for the allele  
1458 frequency of each time period. For each candidate SNP, we also plotted the scores in the local region  
1459 surrounding the SNP (Figure S14.4, S14.7, S14.10 for the “general”, “ancient” and “recent” scans,  
1460 respectively). Finally, we visually verified whether any of the top selection candidates could appear  
1461 as SNPs due to sequencing or mapping errors in the gnomAD browser<sup>244</sup>.

1462

## 1463 **Results**

1464 In the general scan, we mostly find previously described candidate regions for positive selection in  
1465 Europe: the LCT/MCM6 region, the TLR region, the HLA region, SLC45A2 and SLC22A4, all of  
1466 which have been previously reported to be under selection in Europe<sup>160,206</sup>.

1467 In the “ancient” selection scan, we find several new candidates for selection, including a region  
1468 overlapping COL27A1, DNFB31 and AKNA. The region is centered around AKNA, which codes  
1469 for a transcription factor that regulates CD40 and its ligand. It is expressed by B and T lymphocytes,  
1470 natural killer cells and dendritic cells, and plays an important role in the secondary immune  
1471 response<sup>245</sup>. Another candidate region includes the DCC gene, implicated in colorectal cancer<sup>246</sup>. A  
1472 third new candidate region overlaps the DFFB and CEP104 genes. DFFB codes for a nuclease  
1473 involved in apoptosis<sup>247</sup> while CEP104 codes for a protein involved in ciliary structural integrity and  
1474 may be involved in Joubert syndrome<sup>248</sup>. In this scan, we also find a strong candidate for selection in  
1475 a region overlapping the CXCR4 gene, though this one is close to the LCT/MCM6 region and shows  
1476 similar allele frequency dynamics in time, so we cannot discard it may be part of the same selective  
1477 event.

1478 In the “recent” selection scan, we again recover the LCT/MCM6 region (with the highest score by  
1479 far), the TLR region and the HLA region, suggesting that positive selection on these regions has either  
1480 begun (for the LCT/MCM6 region) or persisted (for the other two regions) in recent times. However,  
1481 the SLC45A2 region is not recovered in this scan, in agreement with the previously inferred history  
1482 of allele frequency change in this region<sup>160,206</sup>.

1483

1484

## 1485 Tables

1486

1487 **Table S14.1:** Top candidate SNPs from “general” neoscan temporal scan with K=3. SNPs are listed  
 1488 if they had a log-likelihood ratio score than the 99.9% quantile of the empirical distribution of log-  
 1489 likelihood ratios, and at least two neighboring SNPs (+/- 500kb) with a score larger than the same  
 1490 quantile.

1491

| CHR | POSITION<br>(hg19) | LIKELIHOOD<br>RATIO | GENES (+/- 200 kb)                                                                       |
|-----|--------------------|---------------------|------------------------------------------------------------------------------------------|
| 2   | 136557319          | 66.053              | R3HDM1,UBXN4,LCT,MCM6,DARS                                                               |
| 6   | 31348164           | 31.690              | POU5F1,HCG27,HLA-C,HLA-B,MICA,MICB,MCCD1,ATP6V1G2-DDX39B,DDX39B,ATP6V1G2,NFKBIL1,LTA,TNF |
| 4   | 38859799           | 24.450              | KLF3,TLR10,TLR1,TLR6,FAM114A1,TMEM156,KLHL5                                              |
| 5   | 131586598          | 18.257              | PDLIM4,SLC22A4,SLC22A5,C5orf56,IL3,CSF2,P4HA2                                            |
| 5   | 33954511           | 11.715              | ADAMTS12,RXFP3,SLC45A2,AMACR,C1QTNF3                                                     |

1492

1493

1494 **Table S14.2:** Top candidate SNPs from “ancient” neoscan temporal scan with K=3. SNPs are listed  
 1495 if they had a log-likelihood ratio score than the 99.9% quantile of the empirical distribution of log-  
 1496 likelihood ratios, and at least two neighboring SNPs (+/- 500kb) with a score larger than the same  
 1497 quantile.

| CHR | POSITION<br>(hg19) | LIKELIHOOD<br>RATIO | GENES (+/- 200 kb)                            | NOTES                |
|-----|--------------------|---------------------|-----------------------------------------------|----------------------|
| 9   | 117102046          | 41.088              | COL27A1,ORM1,ORM2,AKNA,DFNB31                 |                      |
| 2   | 136976255          | 39.16               | CXCR4                                         | Near LCT/MCM6 region |
| 18  | 50686991           | 30.029              | DCC                                           |                      |
| 1   | 3776166            | 27.294              | TP73,CCDC27,SMIM1,LRRC47,CEP104,DFFB,C1orf174 |                      |
| 5   | 131586598          | 26.997              | PDLIM4,SLC22A4,SLC22A5,C5orf56,IL3,CSF2,P4HA2 |                      |

|    |           |        |                                             |
|----|-----------|--------|---------------------------------------------|
| 6  | 29732302  | 23.505 | GABBR1,OR2H2,MOG,ZFP57,HLA-F,HLA-G,HLA-A    |
| 1  | 61115790  | 21.933 | N/A                                         |
| 5  | 33958910  | 20.607 | ADAMTS12,RXFP3,SLC45A2,AMACR,C1QTNF3        |
| 16 | 83508437  | 18.912 | CDH13                                       |
| 4  | 38886293  | 18.04  | KLF3,TLR10,TLR1,TLR6,FAM114A1,TMEM156,KLHL5 |
| 1  | 163837511 | 17.854 | N/A                                         |

1498

1499

1500 **Table S14.3:** Top candidate SNPs from “recent” neoscan temporal scan with K=3. SNPs are listed if  
1501 they had a log-likelihood ratio score than the 99.9% quantile of the empirical distribution of log-  
1502 likelihood ratios, and at least two neighboring SNPs (+/- 500kb) with a score larger than the same  
1503 quantile.

1504

| CHR | POSITION<br>(hg19) | LIKELIHOOD<br>RATIO | GENES (+/- 200 kb)                                                                       | NOTES                           |
|-----|--------------------|---------------------|------------------------------------------------------------------------------------------|---------------------------------|
| 2   | 135631400          | 52.517              | TMEM163,ACMSD,CCNT2,MAP3K19<br>,RAB3GAP1                                                 | Near LCT/MCM6 region            |
| 6   | 31348164           | 17.39               | POU5F1,HCG27,HLA-C,HLA-B,MICA,MICB,MCCD1,ATP6V1G2-DDX39B,DDX39B,ATP6V1G2,NFKBIL1,LTA,TNF |                                 |
| 4   | 38859799           | 12.357              | KLF3,TLR10,TLR1,TLR6,FAM114A1, TMEM156,KLHL5                                             |                                 |
| 8   | 140922006          | 11.382              | TRAPPC9,C8orf17                                                                          | May not be a true SNP: no rs ID |
| 13  | 34067497           | 8.713               | STARD13                                                                                  | May not be a true SNP: no rs ID |

1505

1506

1507

1508

1509

1510

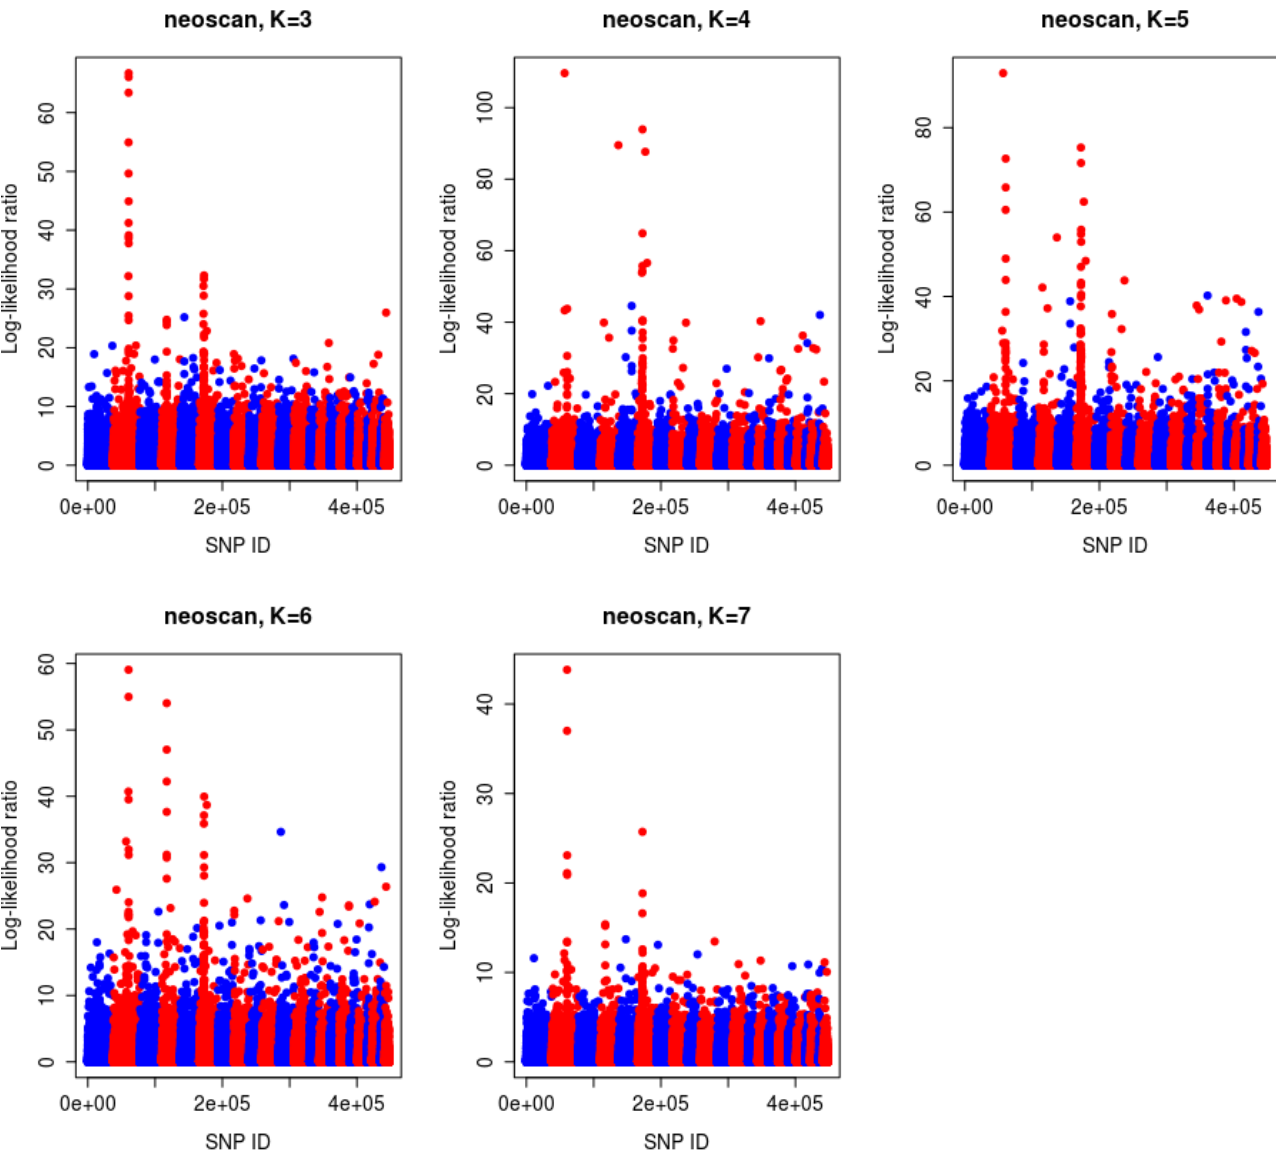

1512 **Fig. S14.1:** Manhattan plots of Ohana neoscan with a latent ancestry fitting ranging from K=3 to  
1513 K=7.

1514



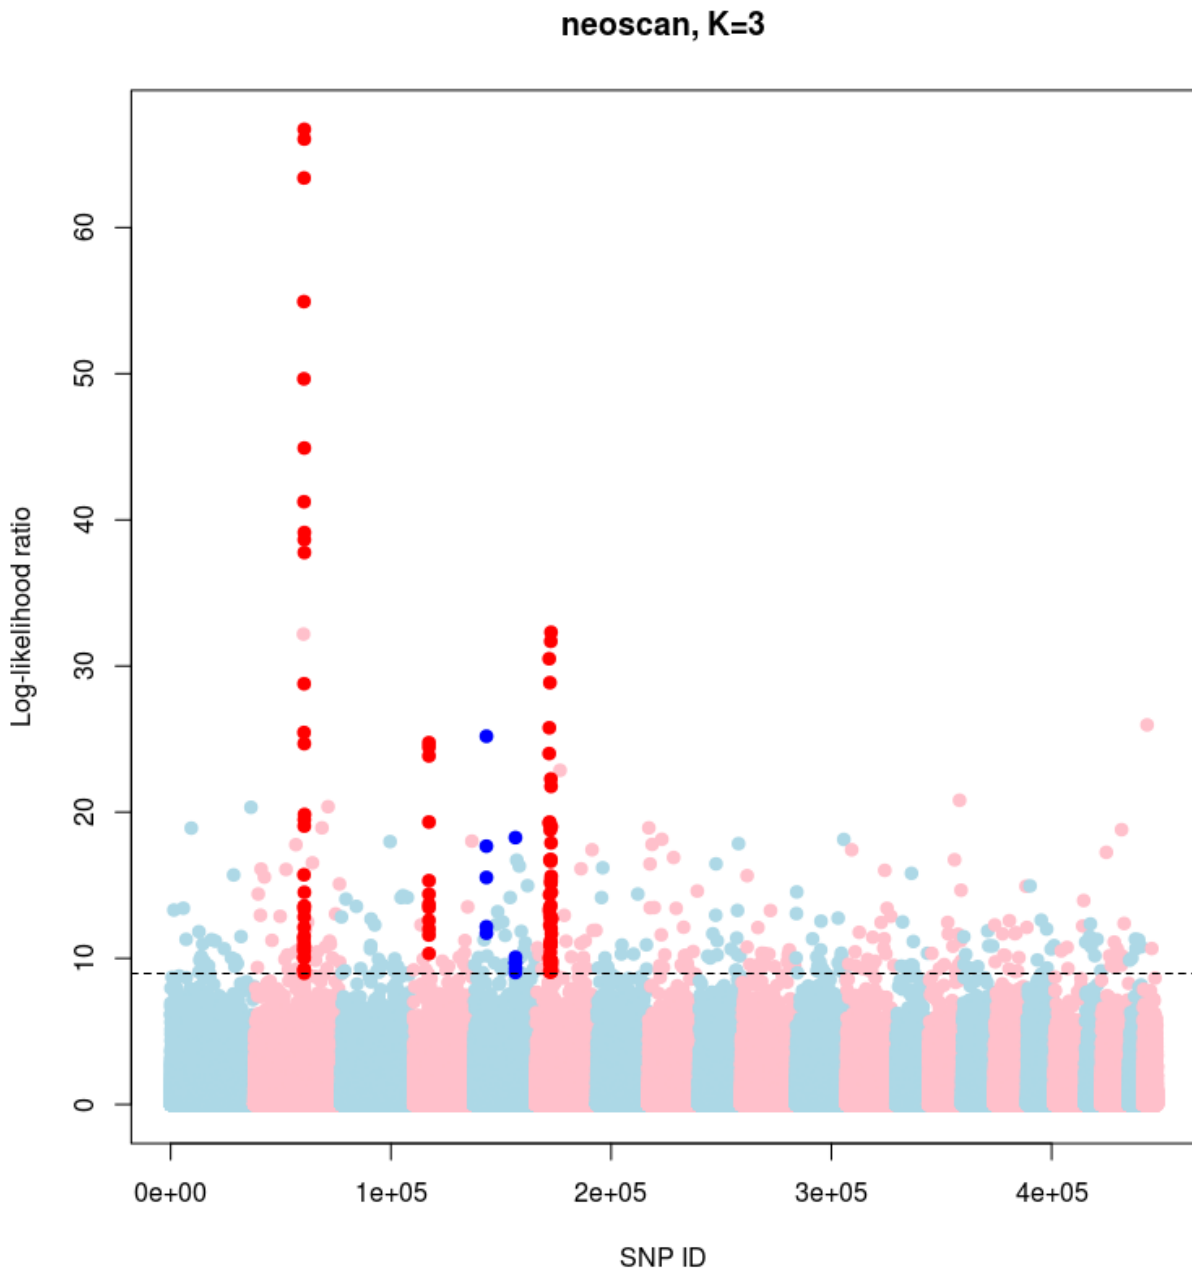

**Fig. S14.2:** Manhattan plot of Ohana “general” neoscan (K=3) looking for SNPs whose allele frequencies were strongly associated with time over the entire 10,000 BP period, after accounting for genome-wide changes in ancestry over time. The highlighted SNPs have a score larger than the 99.9% quantile of the empirical distribution of log-likelihood ratio, and have at least two neighboring SNPs (+/- 500kb) with a score larger than the same quantile.

1525

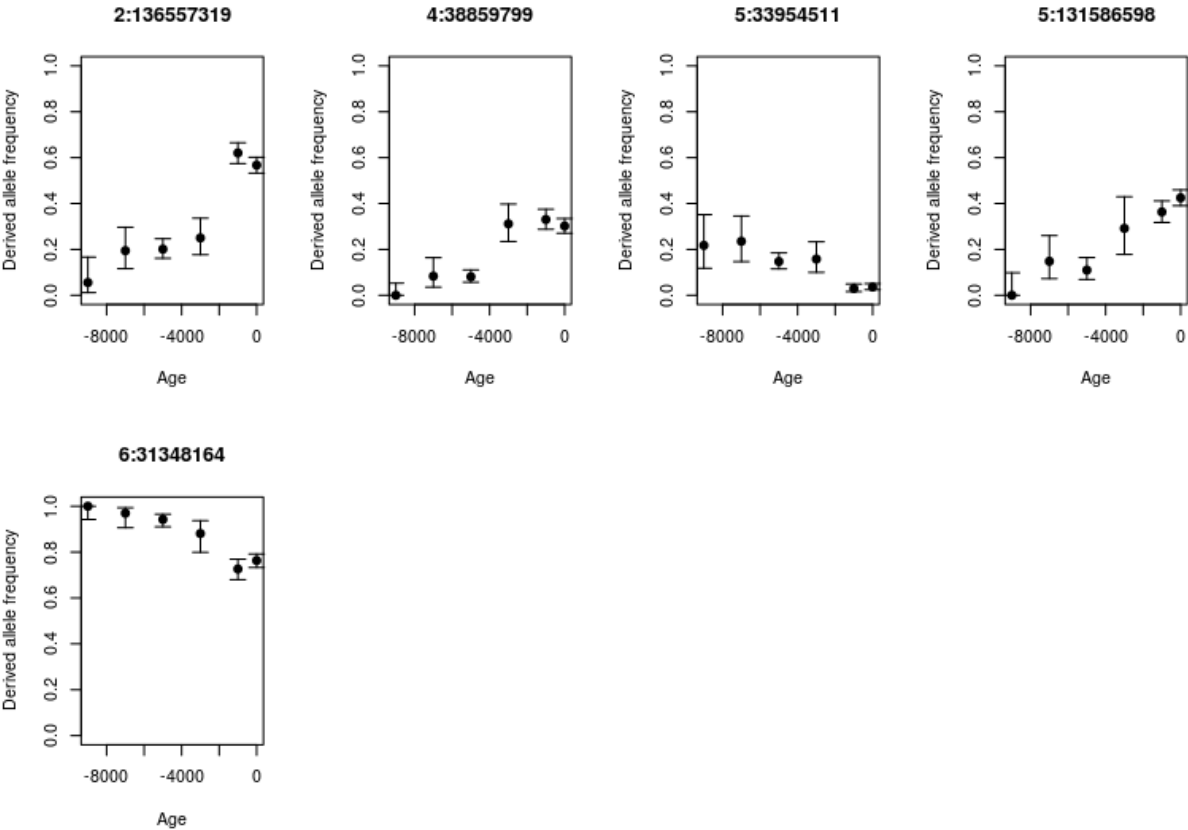

1526

1527 **Fig. S14.3:** Derived allele frequencies of top candidate SNPs from “general” scan with K=3, as a  
1528 function of age, after aggregating ages of ancient samples into 2,000-year bins. 95% Bayesian  
1529 credible intervals (error bars) were computed using a Jeffreys prior.

1530

1531

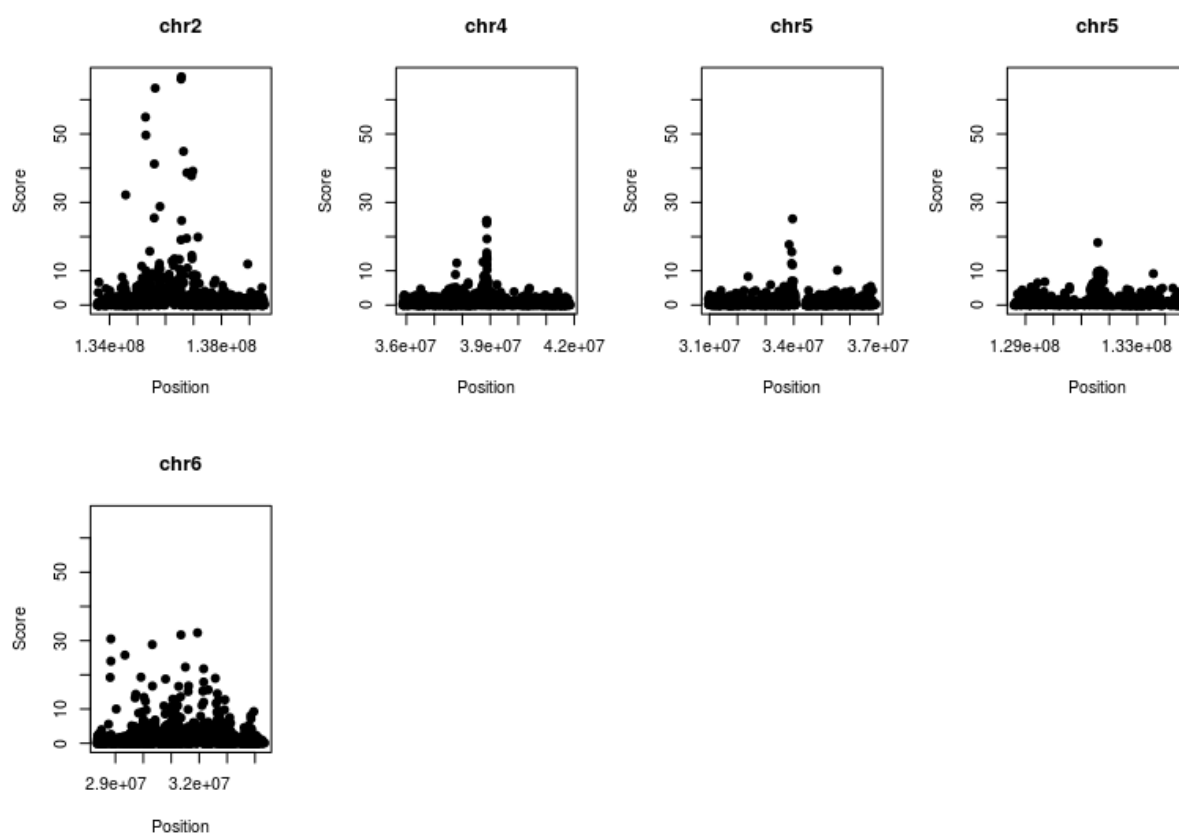

**Fig. S14.4:** Zoomed-in plots of regions ( $\pm 3$  Mb) surrounding the candidate SNPs from the “general” scan.

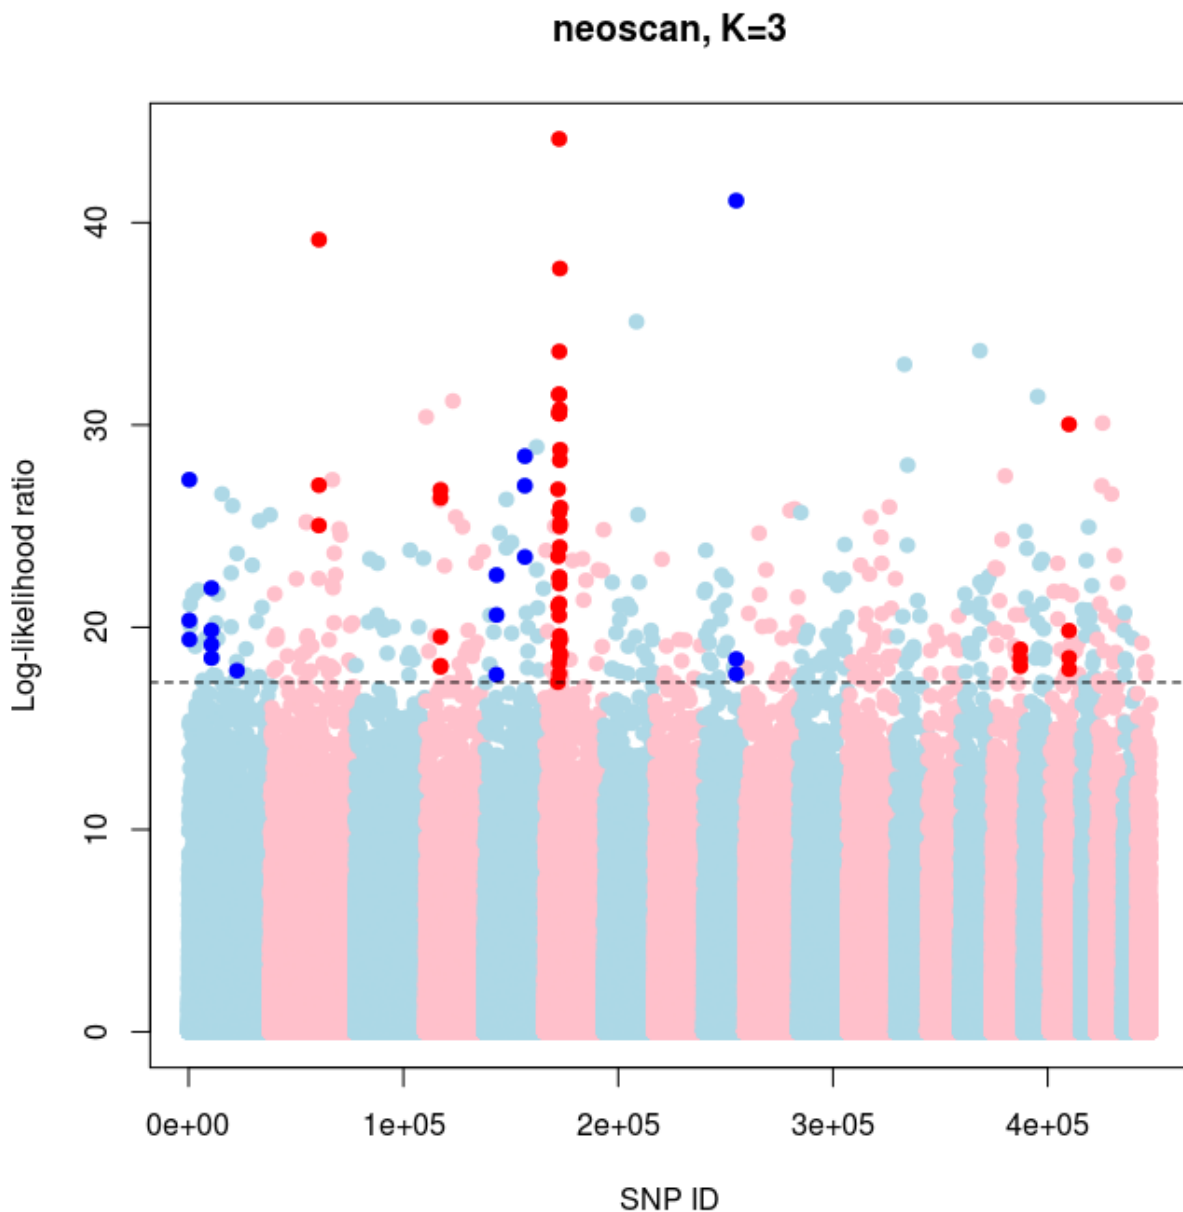

**Fig. S14.5:** Manhattan plot of Ohana ‘ancient’ neoscan (K=3) looking for SNPs whose allele frequencies were strongly associated with time after 4,000 BP, after accounting for genome-wide changes in ancestry over time. The highlighted SNPs have a score larger than the 99.9% quantile of the empirical distribution of log-likelihood ratio, and have at least two neighboring SNPs ( $\pm 500\text{kb}$ ) with a score larger than the same quantile.

1550

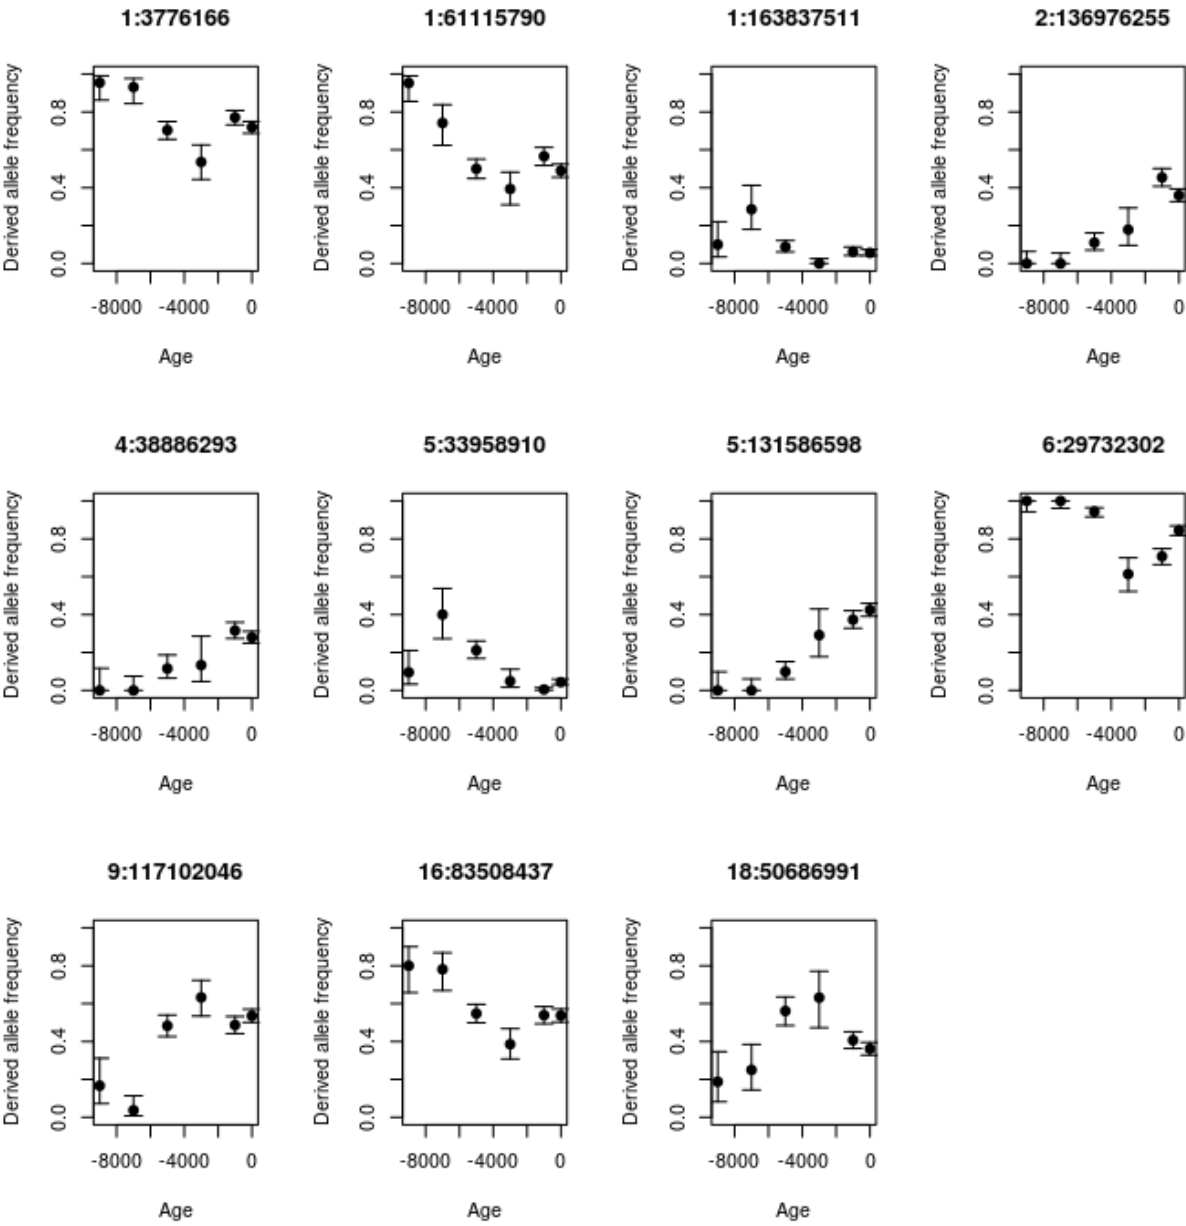

1551

1552 **Fig. S14.6:** Derived allele frequencies of top candidate SNPs from ‘ancient’ scan, as a function of  
1553 age, after aggregating ages of ancient samples into 2,000-year bins. 95% Bayesian credible intervals  
1554 (error bars) were computed using a Jeffreys prior.

1555

1556

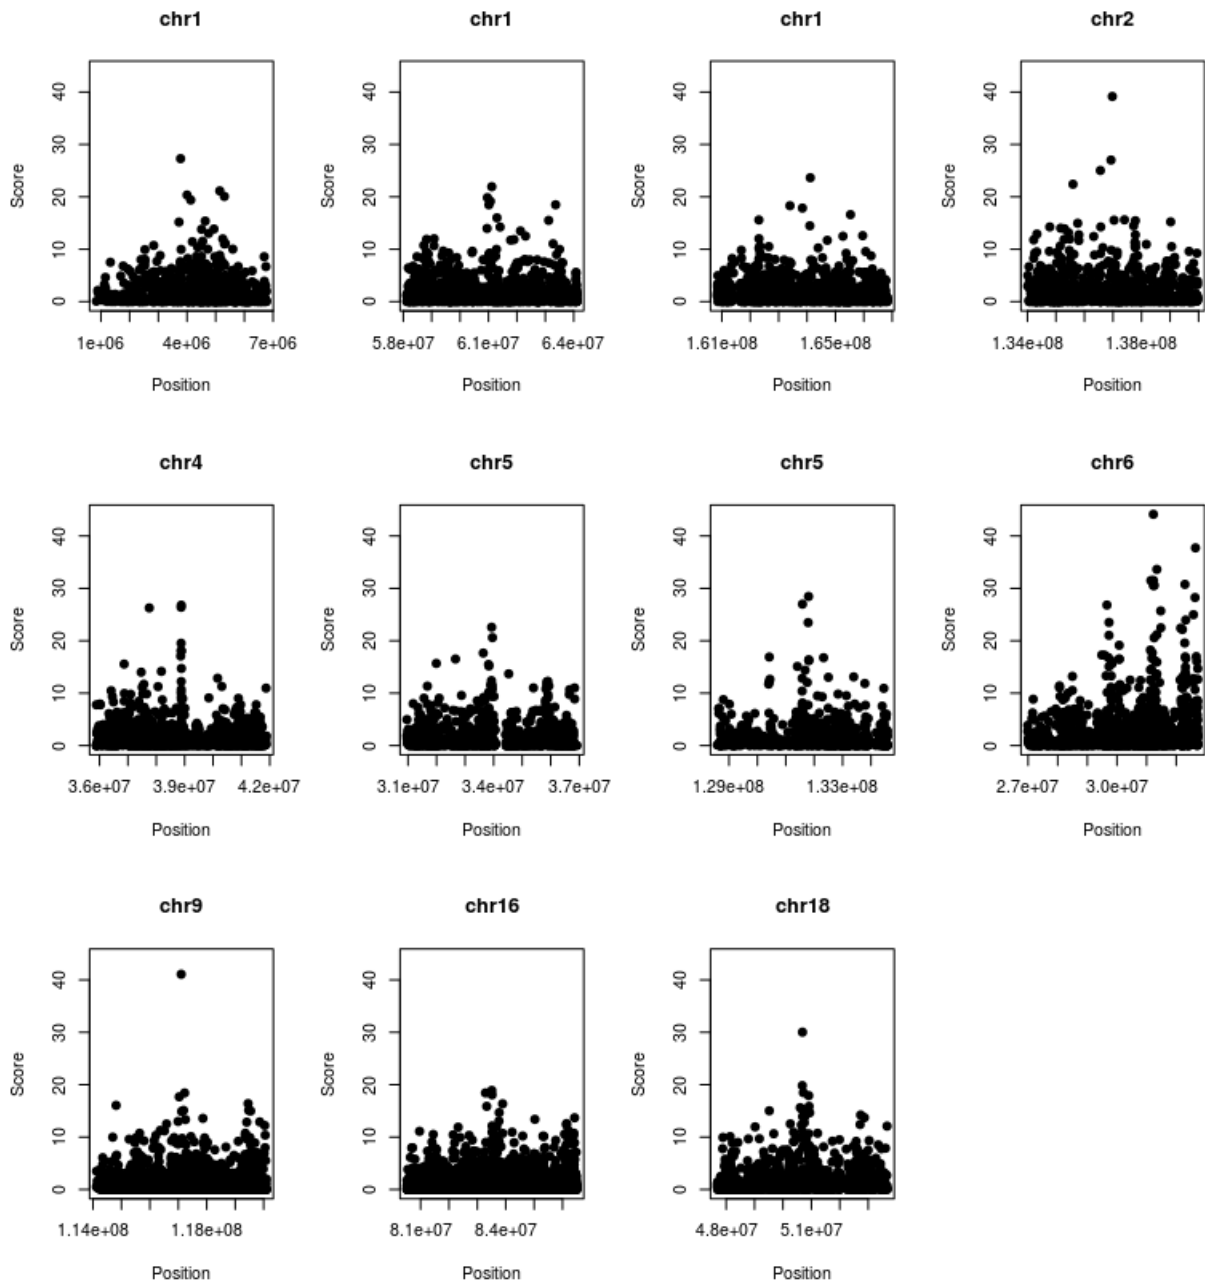

**Fig. S14.7:** Zoomed-in plots of regions (+/- 300 kb) surrounding the candidate SNPs from the ‘ancient’ scan.

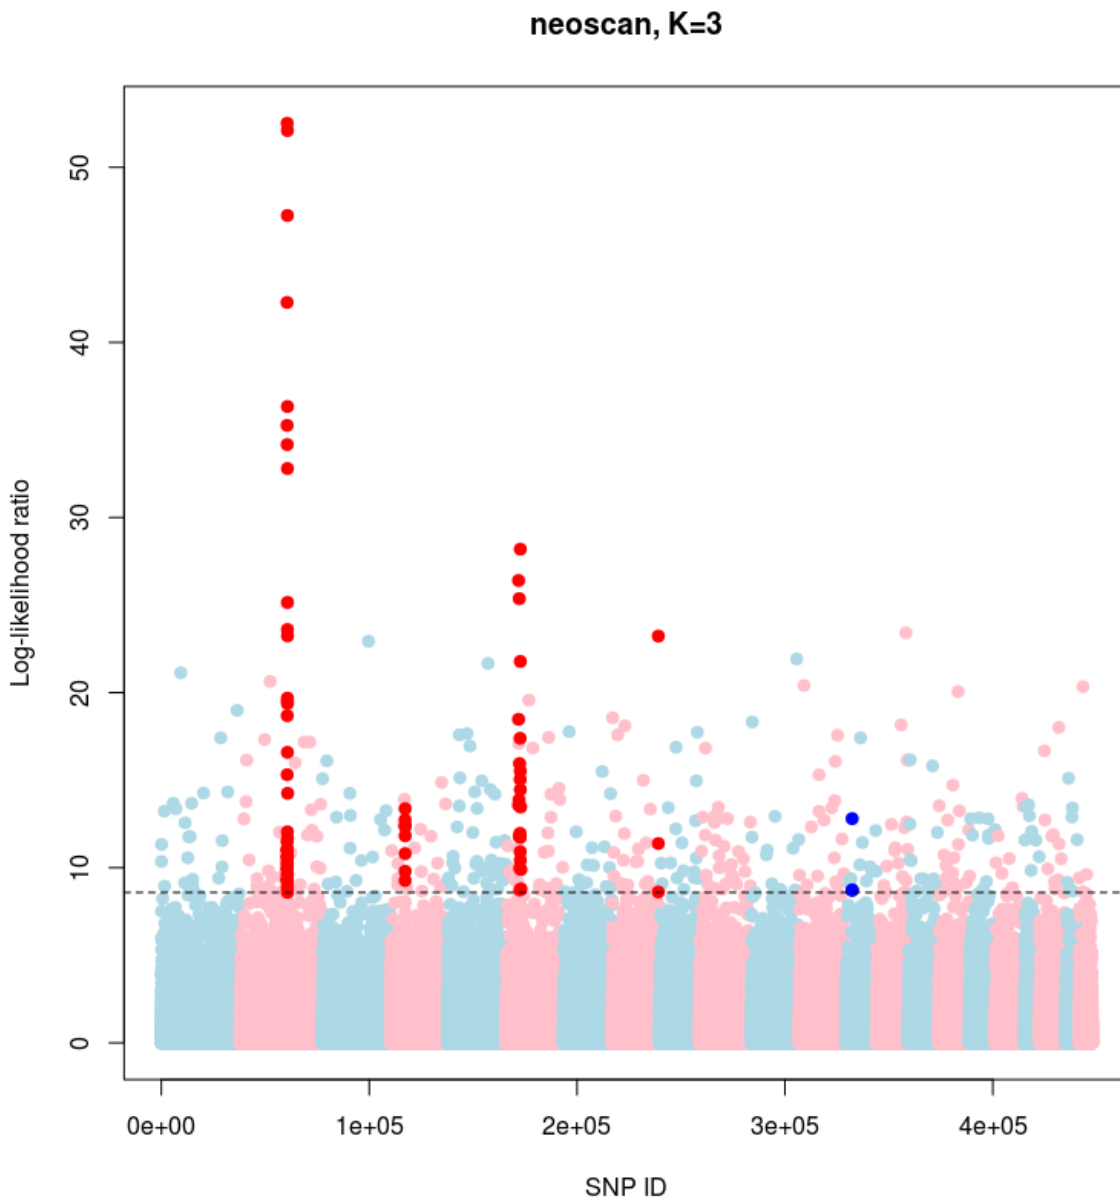

**Fig. S14.8:** Manhattan plot of Ohana ‘recent’ neoscan (K=3) looking for SNPs whose allele frequencies were strongly associated with time after 4,000 BP, after accounting for genome-wide changes in ancestry over time. The highlighted SNPs have a score larger than the 99.9% quantile of the empirical distribution of log-likelihood ratio, and have at least two neighboring SNPs ( $\pm 500\text{kb}$ ) with a score larger than the same quantile.

1574

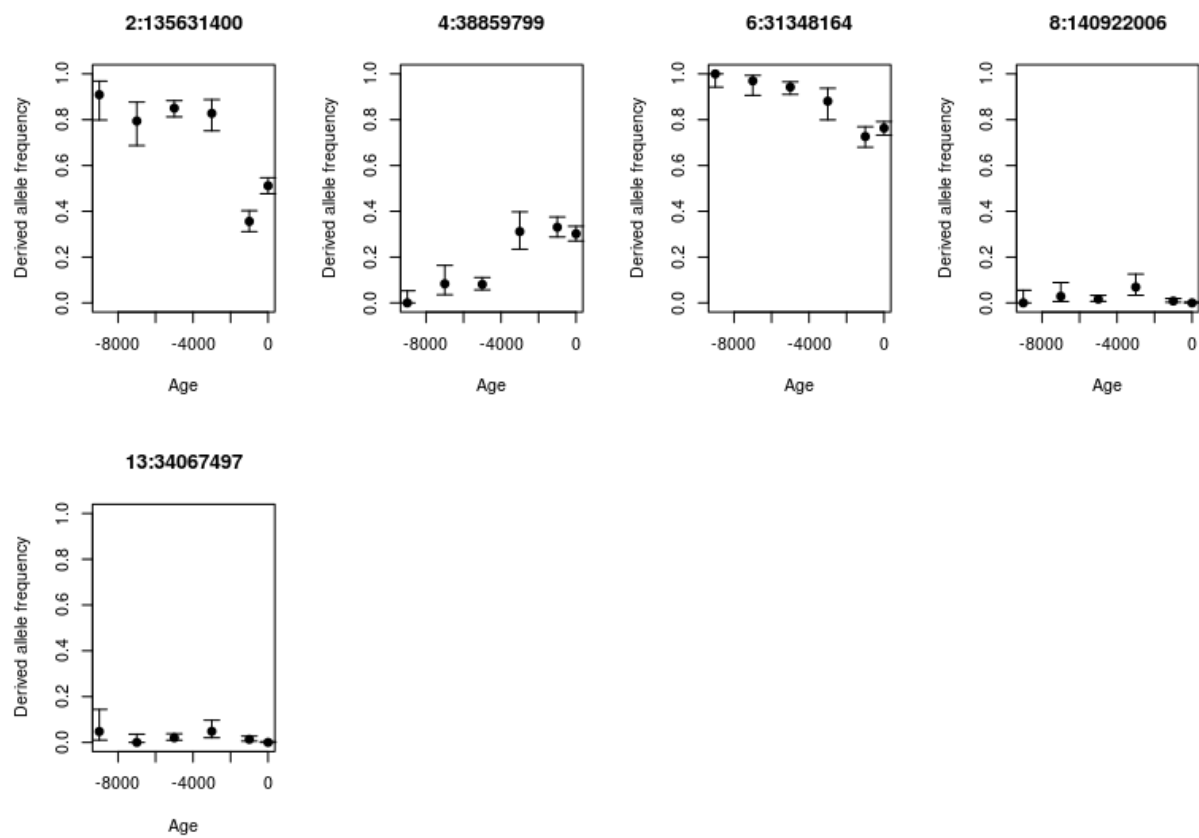

**Fig.**

1575

1576

1577

1578

1579

1580

**S14.9:** Derived allele frequencies of top candidate SNPs from ‘recent’ scan, as a function of age, after aggregating ages of ancient samples into 2,000-year bins. 95% Bayesian credible intervals (error bars) were computed using a Jeffreys prior.



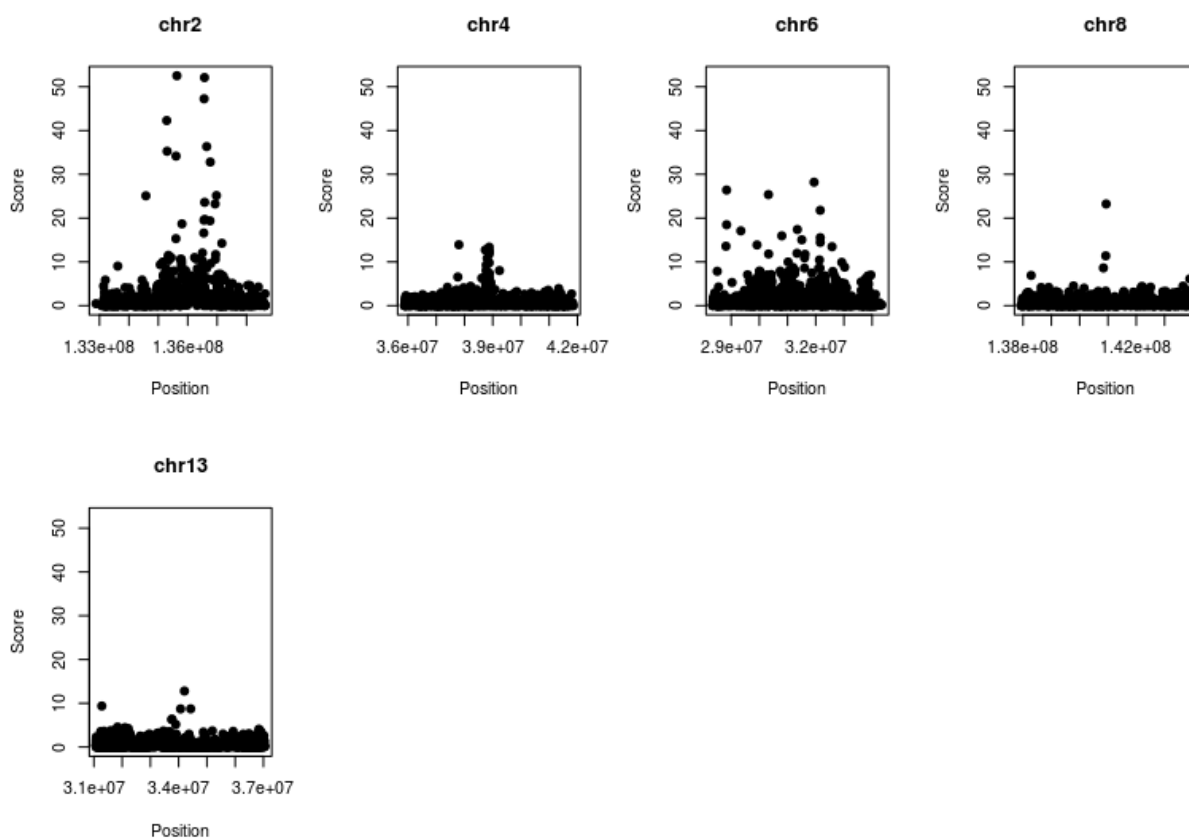

**Fig. S14.10:** Zoomed-in plots of regions (+/- 3 Mb) surrounding the candidate SNPs from the 'recent' scan.

## 1585 **Supplementary Note 15**

### 1586 **Tracking the evolution of complex traits in Scandinavia**

1587 We wanted to examine whether we could identify signals of recent population differentiation of  
1588 complex traits by comparing genotypes of Viking Age samples excavated in Scandinavia (i.e.  
1589 Denmark, Sweden and Norway) with those of a present-day Scandinavian population. We chose to  
1590 focus on traits for which summary statistics from well-powered genome-wide association studies  
1591 (GWAS) were available.

1592

### 1593 **Samples & genotyping**

1594 For comparison with the Viking Age samples we used imputed genotypes from subjects born in  
1595 Denmark between 1981-2011 from the IPSYCH case-cohort study<sup>239</sup>. To minimize potential bias  
1596 from sample source and genotyping platform (the IPSYCH samples are genotyped on Illumina  
1597 PsychArray and imputed with SHAPEIT3<sup>249</sup> and IMPUTE2<sup>250</sup> using 1000 Genomes as reference) we  
1598 filtered both datasets on markers' imputation info ( $>0.98$ ) and minor allele frequency ( $>0.1$ ) before  
1599 merging the datasets on c. 1.3M SNP markers present in both datasets. We then further filtered the  
1600 merged dataset to include only samples and markers with  $>0.98$  genotype yield.

1601

### 1602 **Principal component analysis**

1603 To prevent the large present-day Danish sample from dominating the weights of the principal  
1604 components, we used a subset of samples to estimate principal components, and then the rest of the  
1605 sample was projected onto these components. We pruned genotypes reiteratively with respect to LD  
1606 ( $R^2 < 0.1$  within a window of 100 adjacent SNPs) to a set of 21,013 uncorrelated autosomal SNPs and  
1607 used all unrelated Viking age samples and a subset of unrelated IPSYCH samples enriched for ethnic  
1608 diversity ( $\approx 1,000$  random population samples with both parents born in Denmark and further  $\approx 3,000$   
1609 samples with both parents born outside Denmark, including  $\approx 2,000$  with both parents born outside  
1610 Europe) and derived 25 ancestry-sensitive principal components (PC) with SMARTPCA<sup>251</sup>.

1611

### 1612 **Polygenic score analysis**

1613 We downloaded summary statistics from the Genome wide association study ATLAS webpage  
1614 (<https://atlas.ctglab.nl>)<sup>252</sup>, from studies of 16 disease- and anthropometric traits (excluding those  
1615 related to cognition) published in 2017 or later with SNP heritability estimated at  $>0.1$ , sample size  
1616 of  $>100,000$ , and  $>100$  identified genome-wide significant loci. We calculated polygenic risk scores

1617 based on independent ( $R^2 < 0.1$  within 10Mb range) genome-wide significant allelic effects and  
1618 standardized them to a unit representing the standard deviation of the mean of their distribution. We  
1619 then removed outliers (anyone with a value for any of the 25 PCs falling more than 4 standard  
1620 deviations away from the group mean) reiteratively from within each ancestry group (treating the  
1621 Scandinavian Viking age samples as one ancestry group), and subsequently tested for difference in  
1622 PRS distribution between Viking age samples and Danish ancestry IPSYCH random population  
1623 samples using a linear regression model correcting for sex and the 25 principal components. The  
1624 analysis was done in R (version 3.5.0) and we use the *ggplot* function of the *ggplot2* package, and the  
1625 *forest* function of the *metafor* package to plot the results in figure S15.1 and Extended Data Fig. 5.

1626

## 1627 **Results**

1628 A plot of the first two PCs (Figure S15.1) shows clustering of the present-day IPSYCH random  
1629 sample according to ancestry (as determined by parents' country/region of birth), and that the Viking  
1630 age samples (N = 148) cluster together with the Danish ancestry IPSYCH random sample (N =  
1631 20,551). PRS for three of the 16 traits showed difference between PRS of Viking age samples and  
1632 the Danish ancestry IPSYCH random population sample (Extended Data Fig. 5); these were PRS for  
1633 black hair colour and standing height from GWAS of the UK biobank (N≈385,000), and for  
1634 schizophrenia from a GWAS meta-analysis of the Psychiatric Genomics Consortium (N=105,318).  
1635 The difference in PRS for height and schizophrenia between the Viking Age and present-day Danish  
1636 random sample did however not remain significant after taking into account the number of tests.  
1637 To test whether the observed difference in PRS for black hair colour was driven by a few large effect  
1638 loci, or otherwise dependent on the estimated allelic effects from the respective GWA studies, we  
1639 performed a binomial test of the number of risk alleles found in higher frequency in the Viking Age  
1640 sample (n=65) and the present-day sample (n=41), respectively, which showed a significant  
1641 difference from a 50/50 distribution (P = 0.025). To further test whether this difference could be  
1642 explained by the frequency distribution of the risk alleles, we performed a permutation test, in which  
1643 we replaced the actual risk alleles for black hair colour 1,000 times with randomly drawn alleles  
1644 matched on ancestral allele frequency. In 17 of the 1,000 permutations the distribution of risk alleles  
1645 (according to whether the frequency was higher in the Viking Age or present-day sample) deviated  
1646 as much, or more, from a 50/50 distribution, than we had observed with the actual risk alleles  
1647 (adjusted P = 0.017). Hence, we conclude that the observed PRS difference is neither explained by a

few large effect loci, nor by a general tendency of alleles with the same frequency distribution as the risk alleles to be found at differing frequencies between the Viking age and present-day sample. Thus, it appears that frequencies of established common alleles affecting hair colour have significantly changed in the Danish population since the Viking Age, whereas we do not observe any significant change for alleles affecting other common anthropometric traits and a few complex disorders. At the moment, we cannot conclude whether this difference is due to selection acting on these alleles between the Viking Age and the present time, or to some other factors, or whether a similar change in allele frequencies affecting hair colour has occurred in the other Scandinavian populations.

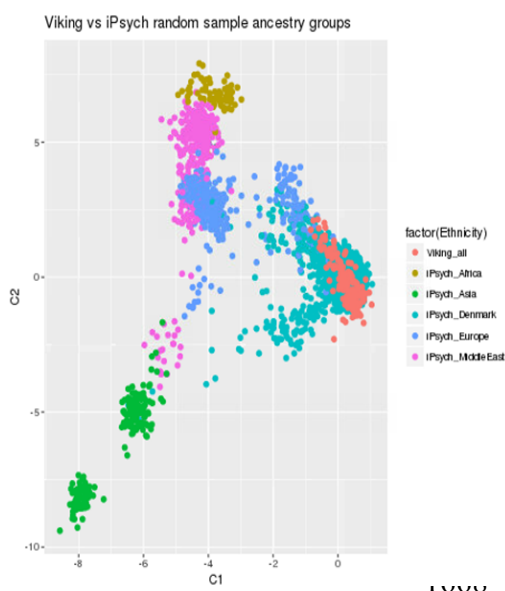

**Fig. S15.1:** A cluster plot of the two first principal components across Viking Age samples (red) and IPSYCH randomly drawn Danish population sample grouped by parents' birthplace (only using samples where both parents are born either in Denmark or one of the other respective regions). The Viking age samples fall mostly within the cluster of Danish ancestry.

## 1676 **References**

- 1677 1. Jesch, J. *The Viking Diaspora*. (Routledge, 2015).
- 1678 2. Abrams, L. Diaspora and identity in the Viking Age. *Early Medieval Europe* **20**, 17–38 (2012).
- 1679 3. Barrett, J. Rounding up the usual suspects: Causation and the Viking Age diaspora. in *The Global*  
1680 *Origins and Development of Seafaring* 289–302 (McDonald Institute for Archaeological  
1681 Research, 2010).
- 1682 4. Barrett, J. H. What caused the Viking Age? *Antiquity* **82**, 671–685 (2008).
- 1683 5. Lind, J. H. The Concept of ‘Europeanisation’ on the Baltic Rim as Seen from the East. *The*  
1684 *European Frontier: Clashes and Compromises in the Middle Ages* 41–45 (2000).
- 1685 6. *Identity Formation and Diversity in the Early Medieval Baltic and Beyond: Communicators and*  
1686 *Communication*. (BRILL, 2017).
- 1687 7. Carver, M. O. H. *Sutton Hoo: burial ground of kings?* (University of Pennsylvania Press, 1998).
- 1688 8. Williams, G. Kingship, Christianity and coinage: monetary and political perspectives on silver  
1689 economy in the Viking Age. in *Silver economy in the Viking Age* 177–214 (Walnut Creek, CA:  
1690 Left Coast Press, 2007).
- 1691 9. Murray, A. V. *The North-Eastern Frontiers of Medieval Europe: The Expansion of Latin*  
1692 *Christendom in the Baltic Lands*. (Routledge, 2017).
- 1693 10. Skre, D. The development of urbanism in Scandinavia. in *The Viking World* 83–93 (Routledge,  
1694 2008).
- 1695 11. Hodges, R. *Dark Age Economics: A New Audit*. 176 (Bloomsbury Academic, 2012).
- 1696 12. Sindbæk, S. M. Urbanism and exchange in the North Atlantic/Baltic, 600–1000CE. in *Routledge*  
1697 *Handbook of Archaeology and Globalization* 553–565 (Routledge, 2016).
- 1698 13. Dugmore, A. J. *et al.* The Norse landnám on the North Atlantic islands: an environmental impact  
1699 assessment. *Polar Rec.* **41**, 21–37 (2005).
- 1700 14. Frei, K. M. *et al.* Was it for walrus? Viking Age settlement and medieval walrus ivory trade in  
1701 Iceland and Greenland. *World Archaeol.* **47**, 439–466 (2015).
- 1702 15. Benedictow, O. J. The demography of the Viking age and the high middle ages in the Nordic  
1703 countries. *Scand. J. Hist.* **21**, 151–182 (1996).
- 1704 16. Raffield, B., Price, N. & Collard, M. Male-biased operational sex ratios and the Viking  
1705 phenomenon: an evolutionary anthropological perspective on Late Iron Age Scandinavian  
1706 raiding. *Evol. Hum. Behav.* **38**, 315–324 (2017).
- 1707 17. Hedeager, L. *Iron-age societies: From tribe to state in northern Europe, 500 BC to AD 700*.

- (Blackwell Oxford, 1992).
- 1709 18. Hedeager, L. *Iron Age Myth and Materiality: An Archaeology of Scandinavia AD 400-1000*.  
 1710 (Routledge, 2011).
  - 1711 19. Hines, J. *The Anglo-Saxons from the Migration Period to the Eighth Century: An Ethnographic*  
 1712 *Perspective (Vol. 2)*. (Boydell Press, 2003).
  - 1713 20. Schiffels, S. *et al.* Iron Age and Anglo-Saxon genomes from East England reveal British  
 1714 migration history. *Nat. Commun.* **7**, 10408 (2016).
  - 1715 21. Büntgen, U. *et al.* Cooling and societal change during the Late Antique Little Ice Age from 536  
 1716 to around 660 AD. *Nature Geoscience* **9**, 231–236 (2016).
  - 1717 22. Little, L. K. *Plague and the End of Antiquity: The Pandemic of 541-750*. (Cambridge University  
 1718 Press, 2007).
  - 1719 23. Gräslund, B. & Price, N. Twilight of the gods? The ‘dust veil event’ of AD 536 in critical  
 1720 perspective. *Antiquity* **86**, 428–443 (2012).
  - 1721 24. Ljungkvist, J. Continental imports to Scandinavia: patterns and changes between AD 400 and  
 1722 800. in *Foreigners in early medieval Europe: thirteen international studies on early medieval*  
 1723 *mobility* 27–50 (Mainz: Römisch-Germanischen Zentralmuseums, 2009).
  - 1724 25. Gräslund, B. *Beowulfkvädet: den nordiska bakgrunden*. (Acta Academiae Gustavi Adolphi  
 1725 CXLIX: Uppsala, 2018).
  - 1726 26. Ashby, S. P., Coutu, A. N. & Sindbæk, S. M. Urban Networks and Arctic Outlands: Craft  
 1727 Specialists and Reindeer Antler in Viking Towns. *European Journal of Archaeology* **18**, 679–  
 1728 704 (2015).
  - 1729 27. Baug, I., Skre, D., Heldal, T. & Jansen, Ø. J. The beginning of the Viking Age in the West.  
 1730 *Journal of Maritime Archaeology* **14**, 43–80 (2019).
  - 1731 28. Heen-Pettersen, A. M. The Earliest Wave of Viking Activity? The Norwegian Evidence  
 1732 Revisited. *European Journal of Archaeology* 1–19
  - 1733 29. Englert, A. & Crumlin-Pedersen, O. *Large Cargo Ships in Danish Waters 1000-1250: Evidence*  
 1734 *of Specialised Merchant Seafaring Prior to the Hanseatic Period*. (Viking Ship Museum, 2015).
  - 1735 30. Douglas Price, T., Peets, J., Allmäe, R., Maldre, L. & Oras, E. Isotopic provenancing of the  
 1736 Salme ship burials in Pre-Viking Age Estonia. *Antiquity* **90**, 1022–1037 (2016).
  - 1737 31. Roesdahl, E. *The Vikings*. (Penguin UK, 1998).
  - 1738 32. Bolton, T. *The Empire of Cnut the Great: Conquest and the Consolidation of Power in Northern*  
 1739 *Europe in the Early Eleventh Century*. (BRILL, 2009).

- 1740 33. Svanberg, F. *Death Rituals in South-East Scandinavia Ad 800-1000: Decolonizing the Viking*  
1741 *Age*. (Lund: Lund University, 2003).
- 1742 34. Eisenschmidt, S. *Grabfunde des 8. bis 11. Jahrhunderts zwischen Kongeå und Eider Bd. 1-2. 80,*  
1743 *(Neumünster, Wachholtz, 2004).*
- 1744 35. Jansson, I. *Ovala spännbucklor: en studie av vikingatida standardsmycken med utgångspunkt*  
1745 *från Björkö-fyndet*. (Uppsala: Institutionen för Archologi, Gustavianum, 1985).
- 1746 36. Grøn, O., Krag, A. H. & Bennike, P. *Vikingetidsgravpladser på Langeland*. (Rudkøbing:  
1747 Langelands Museum., 1994).
- 1748 37. Melchior, L., Kivisild, T., Lynnerup, N. & Dissing, J. Evidence of authentic DNA from Danish  
1749 Viking Age skeletons untouched by humans for 1,000 years. *PLoS One* **3**, e2214 (2008).
- 1750 38. Price, T. D., Prangsgaard, K., Kanstrup, M., Bennike, P. & Frei, K. M. Galgedil: isotopic studies  
1751 of a Viking cemetery on the Danish island of Funen, AD 800–1050. *Danish Journal of*  
1752 *Archaeology* **3**, 129–144 (2014).
- 1753 39. Christensen, T. Lejre bag myten: de arkæologiske udgravninger. *Jysk Arkæologisk Selskabs*  
1754 *Skrifter* **87**, Højbjerg 151–154 (2015).
- 1755 40. Andersen, H. H. & Klindt Jensen, O. Hesselbjerg. En gravplads fra vikingetid. *Kuml* **1970** 31–  
1756 41 (1970).
- 1757 41. Jeppesen, J. Randlevs vikinger. *Østjysk Hjemstavn* 9–20 (2000).
- 1758 42. Jeppesen, J. Randlev. in *Viking Aros* 62–71 (Aarhus: Moesgaard Museum, 2005).
- 1759 43. Jørgensen, L. *et al.* Førkristne kultpladser – ritualer og tro i yngre jernalder og vikingetid.  
1760 *Nationalmuseets Arbejdsmark* 186–199 (2014).
- 1761 44. Brønsted, J. Danish Inhumation Graves of the Viking Age: A Survey. *Acta Archaeol.* **7**, 81–228  
1762 (1936).
- 1763 45. Thorvildsen, K. *Ladby-Skibet. Nordiske Fortidsminder , Vol VI.* (København: Lyng, 1957).
- 1764 46. Sørensen, A. C., Bischoff, V., Jensen, K. & Henrichsen, P. *Ladby: a Danish ship-grave from the*  
1765 *Viking Age*. (Viking Ship Museum in Roskilde, 2001).
- 1766 47. Sellevold, B. J., Bröste, K., Hansen, U. L. & Jørgensen, J. B. *Iron age man in Denmark:*  
1767 *Prehistoric man in Denmark, Vol. III.* (Kongelige Nordiske Oldskrift-Selskab, 1984).
- 1768 48. Skaarup, J. *Stengade II. En langelsk gravplads med grave fra romersk jernalder og*  
1769 *vikingetid*. (Rudkøbing: Langelands Museum, 1976).
- 1770 49. Ulriksen, J. Vikingetidens gravskik i Danmark–Spor af begravelsesritualer i jordfæstegrave.  
1771 *Kuml* **60**, 161–245 (2011).

- 1772 50. Søvsø, M. Ribe in Jutland: A short history of Scandinavia's first town between 700 and 1100  
1773 AD. in *Lübecker Kolloquium zur Stadtarchäologie im Hanserum X 679–690* (Verlag Schmidt-  
1774 Römhild, 2016).
- 1775 51. Petersen, J. *De norske vikingesverd: en typologisk-kronologisk studie over vikingetidens vaaben*.  
1776 (Dybwad, 1919).
- 1777 52. Holst, M. K. *et al.* Direct evidence of a large Northern European Roman period martial event  
1778 and postbattle corpse manipulation. *Proc. Natl. Acad. Sci. U. S. A.* **115**, 5920–5925 (2018).
- 1779 53. Androschuk, F. *Viking Swords: Swords and Social Aspects of Weaponry in Viking Age*  
1780 *Societies*. **23**, (Statens historiska museum, 2014).
- 1781 54. Russ, H. *Osteologisk analyse av skjeletter fra jernalder*. (Museum of Cultural History,  
1782 University of Oslo, Oslo, 2013).
- 1783 55. Naumann, E. Diet, Mobility and Social Identity in Norway AD 400 - 1050. An investigation  
1784 based on d13C, d15N and 87Sr/86Sr analyses of Human Remains. (University of Oslo, Faculty  
1785 of Humanities, 2014).
- 1786 56. Petersen, J. *Vikingetidens Redskaper*. (Dybwad, 1951).
- 1787 57. Krzewińska, M. *et al.* Mitochondrial DNA variation in the Viking age population of Norway.  
1788 *Philos. Trans. R. Soc. Lond. B Biol. Sci.* **370**, 20130384 (2015).
- 1789 58. Schreiner, K. E. Menneskeknoklene fra Osebergskibet og andre norske jernalderfund. in  
1790 *Osebergfundet V*, 81–279 (Universitetets Oldsaksamling, 1927).
- 1791 59. Shetelig, H. *The cruciform brooches of Norway*. **1906 no. 8**, (Bergens Museum, 1907).
- 1792 60. Naumann, E., Price, T. D. & Richards, M. P. Changes in dietary practices and social organization  
1793 during the pivotal late iron age period in Norway (AD 550–1030): Isotope analyses of  
1794 merovingian and viking age human remains. *Am. J. Phys. Anthropol.* **155**, 322–331 (2014).
- 1795 61. Bjørn, A. *Nogen myrfund fra Trøndelagen*. **4**, (Trondheim, 1920).
- 1796 62. Rygh, O. *Norske Oldsager*. (Cammarmeyer, 1885).
- 1797 63. Petersen, J. *Vikingetidens smykker*. **2**, (Stavanger Museum, 1928).
- 1798 64. Müller-Wille, M. *Bestattung im Boot. Studien zu einer nord-europäischen Grabsitte*. **25/26**,  
1799 (Karl Wachholtz Verlag, 1970).
- 1800 65. Sjøvold, T. *The Iron Age settlement of Arctic Norway : a study in the expansion of European*  
1801 *Iron Age culture within the Arctic Circle : 1 : Early iron age : (Roman and Migration periods)*.  
1802 **1**, (Universitetsforlaget, 1962).
- 1803 66. Gjessing, G. *Oldsaksamlingens tilvekst 1933-35*. **nr 7**, (Tromsø museum, 1938).



- 1804 67. Ashby, S. P. Combs, Contact and Chronology: Reconsidering Hair Combs in Early-Historic and  
1805 Viking-Age Atlantic Scotland. *Mediev. Archaeol.* **53**, 1–33 (2009).
- 1806 68. Долженко, Ю. В. Череп князя Гліба Святославовича. in *Міждисциплінарні гуманітарні*  
1807 *студії. Історичні науки. Вип. 3.*, 33–57 (Київ, 2017).
- 1808 69. Долженко, Ю. В. & Баяк, В. Череп князя Ізяслава Інгваревича. in *Матеріали дослідження*  
1809 *археології Закарпаття і Волині. Вип. 17.*, 268–277 (Львів, 2013).
- 1810 70. Потехіна, І. Д. & Слободян, Т. І. Про населення давньоруської Шестовиці за матеріалами  
1811 інгумацій та кремацій. in *Слов'яни і Русь: археологія та історія.* 237–246 (Стародавній  
1812 світ - Київ, 2013).
- 1813 71. Wallis, S. *The Oxford Henge and Late Saxon Massacre: With Medieval and Later Occupation*  
1814 *at St John's College, Oxford.* (Thames Valley Archaeological Services Limited, 2014).
- 1815 72. Chenery, C., Lamb, A., Evans, J., Sloane, H. & Stewart, C. Appendix 3. Isotope analysis of  
1816 individuals from the Ridgeway Hill mass grave. 'Given to the Ground': a Viking Age Mass Grave  
1817 on Ridgeway Hill, Weymouth. *DNHAS* (2014).
- 1818 73. Loe, L., Boyle, A., Webb, H. & Score, D. 'Given to the Ground': A Viking Age Mass Grave on  
1819 Ridgeway Hill, Weymouth. (Dorset Natural History and Archaeological Society, 2014).
- 1820 74. Vretemark, M. Fru Sigrids gård i Varnhem. in *Medeltida storgårdar. 15 uppsatser om ett*  
1821 *tvärvetenskapligt forskningsproblem* 237–246 (Kungl. Gustav Adolfs Akademien för svensk  
1822 folkkultur, 2014).
- 1823 75. Buikstra, J. E. Standards for data collection from human skeletal remains. *Arkansas*  
1824 *Archaeological Survey Research Series* **44**, (1994).
- 1825 76. Arcini, C. & Frölund, P. Two dwarves from Sweden: a unique case. *International Journal of*  
1826 *Osteoarchaeology* **6**, 155–166 (1996).
- 1827 77. Wynne-Davies, R., Hall, C. M. & Apley, A. G. *Atlas of skeletal dysplasias.* (Churchill  
1828 Livingstone, 1985).
- 1829 78. Samuelsson, B. Å. Ljungbacka – a Late Iron Age Cemetery in SouthWest Scania. *Lund*  
1830 *Archaeological Review* **7**, 89–108 (2001).
- 1831 79. Beskow-Sjöberg, M. & Arnell, K.-H. *Ölands järnåldersgravfält. I,* (Stockholm:  
1832 Riksantikvarieämbetet och Statens historiska Museer, 1987).
- 1833 80. Hagberg, U. E. *Ölands järnåldersgravfält. II,* (Stockholm: Riksantikvarieämbetet och Statens  
1834 historiska Museer, 1991).
- 1835 81. Hagberg, U. E. & Beskow-Sjöberg, M. *Ölands järnåldersgravfält. III,* (Stockholm:

- 1836 Riksantikvarieämbetet och Statens historiska Museer, 1996).
- 1837 82. Fallgren, J. H. & Rash, M. *Ölands järnåldersgravfält. IV*, (Stockholm: Riksantikvarieämbetet  
1838 och Statens historiska Museer, 2001).
- 1839 83. Wilhelmson, H. Perspectives from a human-centred archaeology: Iron Age people and society  
1840 on Öland. (Lund University, 2017).
- 1841 84. Bodin, U. *Ett vikingatida skelettgravfält i Finnveden: gravar och boplatser från arkeologiska  
1842 undersökningar 1990 och 1936-1937 inom ett gravfältskomplex i Nästa, Kärda socken, Värnamo  
1843 kommun, Småland*. (Jönköpings läns museum, 1994).
- 1844 85. Gustafsson, J. *Vikingatida gravfält i Nästa, Kärda: arkeologisk undersökning av del av RAA  
1845 42:2, vikingatida gravfält inom fastigheten Kärda 2:1, Kärda socken i Värnamo kommun i  
1846 Jönköpings län*. (Jönköping: Jönköpings läns museum, 2016).
- 1847 86. Pettersson, H. Undersökning av gravfältet vid Kopparsvik Visby. in *Preliminär redogörelse.  
1848 Visby: Gotländskt Arkiv*. 7–18 (Jönköping: Jönköpings läns museum, 1966).
- 1849 87. Westholm, G. Visby-Bönders hamn och handelsplats. in *Visby, staden, och omlandet*. 49–64  
1850 (Riksantikvarieämbetet och Statens historiska museer, Rapport Medeltidsstaden 72, 1989).
- 1851 88. Toplak, M. Das wikingerzeitliche Gräberfeld von Kopparsvik auf Gotland: Studien zu neuen  
1852 Konzepten sozialer Identitäten am Übergang zum christlichen Mittelalter. (Eberhard Karls  
1853 Universität Tübingen, 2016).
- 1854 89. Arcini, C. The Vikings bare their filed teeth. *Am. J. Phys. Anthropol.* **128**, 727–733 (2005).
- 1855 90. Arcini, C. Kopparsvik—ett märkligt gravfält från vikingatid. in *Gotländskt arkiv* **82**, 11–20  
1856 (2010).
- 1857 91. Carlsson, D., Liebe-Harkort, C. & Widerström, P. *Gård, hamn och kyrka: en vikingatida  
1858 kyrkogård i Fröjel*. (Fröjel Discovery Programme, Gotland University College, Center for Baltic  
1859 Studies, 1999).
- 1860 92. Carlsson, D. 'Ridanäs': vikingahamnen i Fröjel. **2**, (Dan Carlsson, 1999).
- 1861 93. Kirpichnikov, A. N. Про населення давньоруської Шестовиці за матеріалами інгумацій та  
1862 кремацій. in *Vers l'Orient et vers l'Occident : regards croisés sur les dynamiques et les  
1863 transferts culturels des Vikings à la Rous ancienne*. 215–230 (Presses universitaires de Caen,  
1864 2014).
- 1865 94. Sankina, S. L. *Etnicheskaya istoriya srednevekovogo naseleniya Novgorodskoy zemli po dannym  
1866 antropologii (Population history of Novgorod area according to anthropological data)*. (Saint-  
1867 Petersburg: Dmitry Bulanin., 2000).

- 1868 95. Moiseyev, V. G. & Khartanovich, V. I. About role of Bronze Age populations in formation of  
1869 population structure of the forest area of East Europe. in *Trudy 4 (20) vserossiyskogo*  
1870 *arkheologicheskogo kongressa v Kazani. Vol 4.* 397–400 (Kazan: Otechestvo, 2014).
- 1871 96. Mikhaylov, K. A. *Elite funeral rite of ancient Russia* *Elite funeral rite of ancient Russia*. (Sankt-  
1872 Petersburg: Branko, 2016).
- 1873 97. Avdussin, D. A. Gnezdovo–der Nachbar von Smolensk. *Zeitschrift für Archdologie* 263–290  
1874 (1977).
- 1875 98. Puškina, T. A., Muraševa, V. V. & Eniosova, N. V. Der archäologische Komplex von Gnezdovo.  
1876 in *Die Rus' im 9. – 10. Jahrhundert. Ein archaologisches Panorama* 250–281 (Wachholtz  
1877 Murmann, 2017).
- 1878 99. Bajka, M. & Florek, M. Wczesnośredniowieczny cmentarz na Wzgórzu Miejskim – ostatnie  
1879 odkrycia. *Zeszyty Sandomierskie* **36**, 83–86 (2013).
- 1880 100. Bajka, M. & Florek, M. Najstarszy cmentarz wczesnośredniowiecznego Sandomierza. *Zeszyty*  
1881 *Sandomierskie* **39**, 70–74 (2015).
- 1882 101. Bajka, M., Florek, M. & Kotowicz, M. N. Pochówek z czekanem z wczesnośredniowiecznego  
1883 cmentarza na Wzgórzu Miejskim w Sandomierzu. *Acta Militaria Mediaevalia* **XII**, 175–198  
1884 (2016).
- 1885 102. Janowski, A. Early medieval chamber graves on the south coast of the Baltic Sea. in *Der Wandel*  
1886 *um 1000. Beiträge der Sektion zur slawischen Frühgeschichte der 18. Jahrestagung des Mittel-*  
1887 *und Ostdeutschen Verbandes für Altertumsforschung in Greifswald, 23. bis 27. März 2009* **60**,  
1888 257–267 (Langenweissbach, 2011).
- 1889 103. Janowski, A. Groby 558 i 1120 z Cedyni na tle wczesnośredniowiecznych zachodniopomorskich  
1890 pochówków z mieczami. in *Civitas Cedene (Studia i materiały do dziejów Cedyni, vol. 1)* 53–  
1891 103 (Chojna-Szczecin-Cedynia, 2014).
- 1892 104. Nadolski, A. *Studia nad uzbrojeniem polskim w X, XI i XII wieku*. (Łódź, 1954).
- 1893 105. Malinowska-Łazarczyk, H. *Cmentarzysko średniowieczne w Cedyni, vol. 1, 2*. (Szczecin, 1982).
- 1894 106. Porzeziński, A. *Osadnictwo ziemi cedyńskiej we wczesnym średniowieczu. Archeologiczne*  
1895 *studium osadnicze*. (Chojna, 2012).
- 1896 107. Bronicka-Rauhut, J. *Cmentarzysko wczesnośredniowieczne w Czersku*. (Warszawa, 1998).
- 1897 108. Poklewski, T. *Misy brązowe z XI, XII i XIII w.* (Łódź, 1961).
- 1898 109. Jurek, T. Kim był komes wrocławski Magnus? in *Venerabiles, nobiles et honesti. Studia z*  
1899  *dziejów społeczeństwa Polski średniowiecznej. Studia ofiarowane prof. Janowi Bieniakowi w*

- 1900 siedemdziesiątą rocznicę urodzin i czterdziestopięciolecie pracy naukowej 181–192 (Toruń,  
1901 1997).
- 1902 110.Kiersnowska, T. Komes Magnus. Wspomnienia archeologa. in *Wspomnienia, opowiadania i*  
1903 *legendy ziemi czerskiej* 23–31 (Czersk, 2001).
- 1904 111.Morawski, W. & Zaitz, E. Wczesnośredniowieczne cmentarzysko szkieletowe w Krakowie na  
1905 Zakrzówku. *Materiały Archeologiczne* **17**, 53–170 (1977).
- 1906 112.Price, T. D. & Frei, K. M. Isotopic Proveniencing of the Bodzia Burials. in *Bodzia. A late Viking-*  
1907 *age elite cemetery in Central Poland* 445–462 (Brill, Leiden, 2015).
- 1908 113.Bogdanowicz, W., Grzybowski, T. & Buś, M. M. Genetic analysis of selected graves from the  
1909 cemetery. in *Bodzia. A late Viking-age elite cemetery in Central Poland* 463–476 (Brill, Leiden,  
1910 2015).
- 1911 114.Sobkowiak-Tabaka, I. Bodzia: site location and history of research. in *Bodzia. A late Viking-age*  
1912 *elite cemetery in Central Poland* 47–53 (Brill, Leiden, 2015).
- 1913 115.Buko, A. & Kara, M. Chronology of the cemetery. in *Bodzia. A late Viking-age elite cemetery in*  
1914 *Central Poland* 463–476 (Brill, Leiden, 2015).
- 1915 116.Kara, M. Weapons. in *Bodzia. A late Viking-age elite cemetery in Central Poland* 177–196 (Brill,  
1916 Leiden, 2015).
- 1917 117.Barrett, J. H. & Richards, M. P. Identity, Gender, Religion and Economy: New Isotope and  
1918 Radiocarbon Evidence for Marine Resource Intensification in Early Historic Orkney, Scotland,  
1919 UK. *European Journal of Archaeology* **7**, 249–271 (2004).
- 1920 118.Barrett, J. H., Beukens, R. P. & Brothwell, D. R. Radiocarbon dating and marine reservoir  
1921 correction of Viking Age Christian burials from Orkney. *Antiquity* **74**, 537–543 (2000).
- 1922 119.Dockrill, S. J. *et al. Excavations at Old Scatness, Shetland. Volume 1: the Pictish village and*  
1923 *Viking settlement*. (Lerwick: Shetland Heritage Publications, 2010).
- 1924 120.Ritchie, A. Excavation of Pictish and Viking-age farmsteads at Buckquoy, Orkney. *Society of*  
1925 *Antiquaries of Scotland* **108**, 174–227 (1976).
- 1926 121.Ashmore, P. J. *Orkney burials in the first millennium AD*. (Pinkfoot Press, 2003).
- 1927 122.Brundle, A., Lorimer, D. & Ritchie, A. Buckquoy revisited 95-104. in *Sea Change Orkney and*  
1928 *Northern Europe in the later Iron Age AD 300-800*. 139–175 (Leeds: Maney, 2003).
- 1929 123.Morris, C. D. *The Birsay Bay Project Volume 1. Coastal Sites Beside the Brough Road, Birsay,*  
1930 *Orkney: Excavations 1976–1982*. (Durham: University of Durham Department of Archaeology  
1931 Monograph Series, 1989).

- 1932 124. Barrett, J. H., Beukens, R. P. & Nicholson, R. A. Diet and ethnicity during the Viking  
1933 colonization of northern Scotland: evidence from fish bones and stable carbon isotopes. *Antiquity*  
1934 **75**, 145–154 (2001).
- 1935 125. Anderson, T. & Göthberg, H. *Olavskirkens kirkegård: humanosteologisk analyse og*  
1936 *faseinndeling*. (Riksantikvaren, Utgravningskontoret for Trondheim, 1986).
- 1937 126. Favia, P. *et al.* Montecorvino. Parabola insediativa di una cittadina dei Monti Dauni fra XI e XVI  
1938 secolo. in *VII Congresso Nazionale di Archeologia Medievale* 191–196 (Sesto Fiorentino, 2015).
- 1939 127. Corrente, M., Mangialardi, N. M. & Maruotti, M. *Cancarro. Una chiesetta di campagna nella*  
1940 *Capitanata medievale*. (Claudio Grenzi Editore, 2017).
- 1941 128. Bersu, G. & Wilson, D. M. *Three Viking graves in the Isle of Man*. **1**, (Society for Medieval  
1942 Archaeology, 1966).
- 1943 129. Symonds, L., Douglas Price, T., Keenleyside, A. & Burton, J. Medieval Migrations: Isotope  
1944 Analysis of Early Medieval Skeletons on the Isle of Man. *Mediev. Archaeol.* **58**, 1–20 (2014).
- 1945 130. Harrison, S. H. & Ó Floinn, R. *Viking graves and Grave-Goods in Ireland*. **11**, (National  
1946 Museum of Ireland Medieval Dublin Excavations 1962-1981 Ser. B, 2015).
- 1947 131. Sikora, M., Ó Donnabháin, B. & Daly, N. Preliminary report on a Viking warrior grave at War  
1948 Memorial Park, Islandbridge. in *Medieval Dublin XI: Proceedings of the Friends of Medieval*  
1949 *Dublin 12th Annual Symposium, Dublin, 22 May 2010* (Four Courts Press, 2011).
- 1950 132. Kavanagh, J. 4-8 Church Street, Finglas, Dublin. (2004).
- 1951 133. Sikora, M., Sheehan, J. & Corráin, D. Ó. The Finglas burial: archaeology and ethnicity in Viking-  
1952 age Dublin. in *The Viking Age: Ireland and the West: Papers from the proceedings of the*  
1953 *Fifteenth Viking Congress, Cork, 18-27 August 2005* 402–417 (Four Courts Press, Dublin, 2010).
- 1954 134. O'Donovan, E. The Irish, the Vikings and the English: new archaeological evidence from  
1955 excavations at Golden Lane, Dublin. in *Medieval Dublin VIII: proceedings of the Friends of*  
1956 *Medieval Dublin symposium* 36–130 (Dublin, 2006).
- 1957 135. Simpson, L. Viking warrior burials in Dublin: is this the longphort. in *Medieval Dublin VI:*  
1958 *proceedings of the Friends of Medieval Dublin symposium* 11–62 (Dublin, 2005).
- 1959 136. Simpson, L. The first phase of Viking activity in Ireland: archaeological evidence from Dublin.  
1960 in *The Viking Age: Ireland and the West: Papers from the proceedings of the Fifteenth Viking*  
1961 *Congress, Cork, 18-27 August 2005* 418–429 (Dublin, 2010).
- 1962 137. Gestsdóttir, H. *Hofstaðir 2015. Interim report*. (Fornleifastofnun Íslands, Reykjavík, 2016).
- 1963 138. Gestsdóttir, H. *Osteoarthritis in Iceland. An archaeological study*. (Háskóli Íslands, Reykjavík,

- 1964 2014).
- 1965 139. Roberts, H. *Ingiríðarstaðir 2015. An interim statement.* (Forleifastofnun Íslands, Reykjavík,
- 1966 2015).
- 1967 140. Friðriksson, A. *Hringsdalur í Arnarfirði. Fornleifarannsóknir 2008-2011.* (Fornleifastofnun
- 1968 Íslands, Reykjavík, 2015).
- 1969 141. Bruun, D. *Oversigt over nordboruiner i Godthaab-og Frederikshaab-Distrikter.* (Reitzel, 1918).
- 1970 142. Price, T. D. & Arneborg, J. The Peopling of the North Atlantic: Isotopic Results from Greenland.
- 1971 *Journal of the North Atlantic* **7**, 164–185 (2014).
- 1972 143. Arneborg, J. *et al.* Norse Greenland Dietary Economy ca. AD 980–ca. AD 1450: Introduction.
- 1973 *Journal of the North Atlantic* **3**, 1–39 (2012).
- 1974 144. Arneborg, J., Lynnerup, N. & Heinemeier, J. Human diet and subsistence patterns in Norse
- 1975 Greenland AD c. 980—AD c. 1450: Archaeological interpretations. *Journal of the North Atlantic*
- 1976 **3**, 119–133 (2012).
- 1977 145. Vebaek, C. L. *The church topography of the Eastern Settlement and the excavation of the*
- 1978 *Benedictine convent in Uunartoq Fjord.* (Kommissionen for Videnskabelige Undersøgelser i
- 1979 Grønland, 1991).
- 1980 146. Alexandersen, V. & Prætorius, F. Hvad tænder kan fortælle om de første nordboere. *Aktuel*
- 1981 *Arkæologi* **3**, 12–15 (2003).
- 1982 147. Arge, S. V. Viking Faroes: Settlement, Paleoeconomy, and Chronology. *Journal of the North*
- 1983 *Atlantic* **7**, 1–17 (2014).
- 1984 148. Konsa, M., Allmäe, R., Maldre, L. & Vassiljev, J. Rescue excavations of a Vendel Era boat-
- 1985 grave in Salme, Saaremaa. *Archaeological fieldwork in Estonia* **2008**, 213–222 (2009).
- 1986 149. Allmäe, R., Maldre, L. & Tomek, T. The Salme I ship burial: an osteological view of a unique
- 1987 burial in Northern Europe. *Interdisciplinaria Archaeologica: Natural Sciences in Archaeology*
- 1988 **2**, 109–124 (2011).
- 1989 150. Peets, J., Allmäe, R. & Maldre, L. Archaeological investigations of Pre-Viking Age burial boat
- 1990 in Salme village at Saaremaa. *Archaeological fieldwork in Estonia* **2010**, 29–48 (2011).
- 1991 151. Peets, J. *et al.* Research results of the Salme ship burials in 2011-2012. *Archaeological fieldwork*
- 1992 *in Estonia* **2012**, 43–60 (2013).
- 1993 152. Larsson, G. Ship and society: maritime ideology in Late Iron Age Sweden. (2007).
- 1994 153. Nerman, B. Die Vendelzeit Gotlands I: 1 Text. *Kungl. Vitterhets Historie och Antikvitets*
- 1995 *Akademien* **55**, (1975).

- 1996 154.Redknap, M. Viking-age settlement in Wales and the evidence from Llanbedrgoch. in *Land, Sea*  
1997 *and Home* 139–175 (Leeds: Maney, 2004).
- 1998 155.Redknap, M. Defining identities in Viking Age North Wales: new data from Llanbedrgoch. in  
1999 *Shetland and the Viking World. Papers from the Proceedings of the Seventeenth Viking Congress*  
2000 *Lerwick* 159–166 (2016).
- 2001 156.Willerslev, E. & Cooper, A. Review Paper. Ancient DNA. *Proceedings of the Royal Society B:*  
2002 *Biological Sciences* **272**, 3–16 (2005).
- 2003 157.Gilbert, M. T. P., Bandelt, H.-J., Hofreiter, M. & Barnes, I. Assessing ancient DNA studies.  
2004 *Trends Ecol. Evol.* **20**, 541–544 (2005).
- 2005 158.de Barros Damgaard, P. *et al.* Improving access to endogenous DNA in ancient bones and teeth.  
2006 *Sci. Rep.* **5**, 11184 (2015).
- 2007 159.Gamba, C. *et al.* Genome flux and stasis in a five millennium transect of European prehistory.  
2008 *Nat. Commun.* **5**, 5257 (2014).
- 2009 160.Allentoft, M. E. *et al.* Population genomics of Bronze Age Eurasia. *Nature* **522**, 167–172 (2015).
- 2010 161.Meyer, M. & Kircher, M. Illumina sequencing library preparation for highly multiplexed target  
2011 capture and sequencing. *Cold Spring Harb. Protoc.* **2010**, db.prot5448 (2010).
- 2012 162.Schubert, M., Lindgreen, S. & Orlando, L. AdapterRemoval v2: rapid adapter trimming,  
2013 identification, and read merging. *BMC Res. Notes* **9**, 88 (2016).
- 2014 163.Li, H. & Durbin, R. Fast and accurate short read alignment with Burrows–Wheeler transform.  
2015 *Bioinformatics* **25**, 1754–1760 (2009).
- 2016 164.Schubert, M. *et al.* Improving ancient DNA read mapping against modern reference genomes.  
2017 *BMC Genomics* **13**, 178 (2012).
- 2018 165.DePristo, M. A. *et al.* A framework for variation discovery and genotyping using next-generation  
2019 DNA sequencing data. *Nature Genetics* **43**, 491–498 (2011).
- 2020 166.Quinlan, A. R. & Hall, I. M. BEDTools: a flexible suite of utilities for comparing genomic  
2021 features. *Bioinformatics* **26**, 841–842 (2010).
- 2022 167.Jónsson, H., Ginolhac, A., Schubert, M., Johnson, P. L. F. & Orlando, L. mapDamage2.0: fast  
2023 approximate Bayesian estimates of ancient DNA damage parameters. *Bioinformatics* **29**, 1682–  
2024 1684 (2013).
- 2025 168.Fu, Q. *et al.* A revised timescale for human evolution based on ancient mitochondrial genomes.  
2026 *Curr. Biol.* **23**, 553–559 (2013).
- 2027 169.Renaud, G., Slon, V., Duggan, A. T. & Kelso, J. Schmutzi: estimation of contamination and

2028 endogenous mitochondrial consensus calling for ancient DNA. *Genome Biol.* **16**, 224 (2015).

2029 170. Rasmussen, M. *et al.* An Aboriginal Australian genome reveals separate human dispersals into  
2030 Asia. *Science* **334**, 94–98 (2011).

2031 171. Korneliussen, T. S., Albrechtsen, A. & Nielsen, R. ANGSD: Analysis of Next Generation  
2032 Sequencing Data. *BMC Bioinformatics* **15**, 356 (2014).

2033 172. Skoglund, P., Storå, J., Götherström, A. & Jakobsson, M. Accurate sex identification of ancient  
2034 human remains using DNA shotgun sequencing. *J. Archaeol. Sci.* **40**, 4477–4482 (2013).

2035 173. Nielsen, J. & Wohler, M. Chromosome abnormalities found among 34910 newborn children:  
2036 results from a 13-year incidence study in Århus, Denmark. *Hum. Genet.* **87**, 81–83 (1991).

2037 174. Weissensteiner, H. *et al.* HaploGrep 2: mitochondrial haplogroup classification in the era of high-  
2038 throughput sequencing. *Nucleic Acids Res.* **44**, W58–63 (2016).

2039 175. Drummond, A. J., Suchard, M. A., Xie, D. & Rambaut, A. Bayesian phylogenetics with BEAUti  
2040 and the BEAST 1.7. *Mol. Biol. Evol.* **29**, 1969–1973 (2012).

2041 176. Miller, M. A., Pfeiffer, W. & Schwartz, T. Creating the CIPRES Science Gateway for inference  
2042 of large phylogenetic trees. in *2010 Gateway Computing Environments Workshop (GCE)* 1–8  
2043 (2010).

2044 177. Rambaut, A., Drummond, A. J., Xie, D., Baele, G. & Suchard, M. A. Posterior Summarization  
2045 in Bayesian Phylogenetics Using Tracer 1.7. *Syst. Biol.* **67**, 901–904 (2018).

2046 178. Posth, C. *et al.* Pleistocene Mitochondrial Genomes Suggest a Single Major Dispersal of Non-  
2047 Africans and a Late Glacial Population Turnover in Europe. *Curr. Biol.* **26**, 827–833 (2016).

2048 179. Ralf, A., González, D. M., Zhong, K. & Kayser, M. Yleaf: Software for Human Y-Chromosomal  
2049 Haplogroup Inference from Next-Generation Sequencing Data. *Mol. Biol. Evol.* **35**, 1291–1294  
2050 (2018).

2051 180. Semino, O. *et al.* Origin, Diffusion, and Differentiation of Y-Chromosome Haplogroups E and  
2052 J: Inferences on the Neolithization of Europe and Later Migratory Events in the Mediterranean  
2053 Area. *Am. J. Hum. Genet.* **74**, 1023–1034 (2004).

2054 181. Poznik, G. D. *et al.* Punctuated bursts in human male demography inferred from 1,244 worldwide  
2055 Y-chromosome sequences. *Nat. Genet.* **48**, 593–599 (2016).

2056 182. Ilumäe, A.-M. *et al.* Human Y Chromosome Haplogroup N: A Non-trivial Time-Resolved  
2057 Phylogeography that Cuts across Language Families. *Am. J. Hum. Genet.* **99**, 163–173 (2016).

2058 183. Rootsi, S. *et al.* Phylogeography of Y-chromosome haplogroup I reveals distinct domains of  
2059 prehistoric gene flow in Europe. *Am. J. Hum. Genet.* **75**, 128–137 (2004).



2060 184. Neuvonen, A. M. *et al.* Vestiges of an Ancient Border in the Contemporary Genetic Diversity of  
2061 North-Eastern Europe. *PLoS One* **10**, e0130331 (2015).

2062 185. Weale, M. E., Weiss, D. A., Jager, R. F., Bradman, N. & Thomas, M. G. Y chromosome evidence  
2063 for Anglo-Saxon mass migration. *Mol. Biol. Evol.* **19**, 1008–1021 (2002).

2064 186. Martiniano, R. *et al.* Genomic signals of migration and continuity in Britain before the Anglo-  
2065 Saxons. *Nat. Commun.* **7**, 10326 (2016).

2066 187. Kivisild, T. The study of human Y chromosome variation through ancient DNA. *Hum. Genet.*  
2067 **136**, 529–546 (2017).

2068 188. Underhill, P. A. *et al.* The phylogenetic and geographic structure of Y-chromosome haplogroup  
2069 R1a. *Eur. J. Hum. Genet.* **23**, 124–131 (2015).

2070 189. Haak, W. *et al.* Massive migration from the steppe was a source for Indo-European languages in  
2071 Europe. *Nature* **522**, 207–211 (2015).

2072 190. de Barros Damgaard, P. *et al.* The first horse herders and the impact of early Bronze Age steppe  
2073 expansions into Asia. *Science* **360**, (2018).

2074 191. Rocca, R. A. *et al.* Discovery of Western European R1b1a2 Y chromosome variants in 1000  
2075 genomes project data: an online community approach. *PLoS One* **7**, e41634 (2012).

2076 192. Myres, N. M. *et al.* A major Y-chromosome haplogroup R1b Holocene era founder effect in  
2077 Central and Western Europe. *Eur. J. Hum. Genet.* **19**, 95–101 (2011).

2078 193. Korneliussen, T. S. & Moltke, I. NgsRelate: a software tool for estimating pairwise relatedness  
2079 from next-generation sequencing data. *Bioinformatics* **31**, 4009–4011 (2015).

2080 194. Monroy Kuhn, J. M., Jakobsson, M. & Günther, T. Estimating genetic kin relationships in  
2081 prehistoric populations. *PLoS One* **13**, e0195491 (2018).

2082 195. Staples, J., Nickerson, D. A. & Below, J. E. Utilizing graph theory to select the largest set of  
2083 unrelated individuals for genetic analysis. *Genet. Epidemiol.* **37**, 136–141 (2013).

2084 196. Krzewińska, M. *et al.* Genomic and Strontium Isotope Variation Reveal Immigration Patterns in  
2085 a Viking Age Town. *Curr. Biol.* **28**, 2730–2738.e10 (2018).

2086 197. Browning, S. R. & Browning, B. L. Rapid and accurate haplotype phasing and missing-data  
2087 inference for whole-genome association studies by use of localized haplotype clustering. *Am. J.*  
2088 *Hum. Genet.* **81**, 1084–1097 (2007).

2089 198. Martiniano, R. *et al.* The population genomics of archaeological transition in west Iberia:  
2090 Investigation of ancient substructure using imputation and haplotype-based methods. *PLoS*  
2091 *Genet.* **13**, e1006852 (2017).

2092 199. Leslie, S. *et al.* The fine-scale genetic structure of the British population. *Nature* **519**, 309–314  
2093 (2015).

2094 200. Genetic Analysis of Psoriasis Consortium & the Wellcome Trust Case Control Consortium 2 *et*  
2095 *al.* A genome-wide association study identifies new psoriasis susceptibility loci and an  
2096 interaction between HLA-C and ERAP1. *Nat. Genet.* **42**, 985–990 (2010).

2097 201. International Multiple Sclerosis Genetics Consortium *et al.* Genetic risk and a primary role for  
2098 cell-mediated immune mechanisms in multiple sclerosis. *Nature* **476**, 214–219 (2011).

2099 202. Chang, C. C. *et al.* Second-generation PLINK: rising to the challenge of larger and richer  
2100 datasets. *Gigascience* **4**, 7 (2015).

2101 203. Kent, W. J. *et al.* The human genome browser at UCSC. *Genome Res.* **12**, 996–1006 (2002).

2102 204. Lazaridis, I. *et al.* Ancient human genomes suggest three ancestral populations for present-day  
2103 Europeans. *Nature* **513**, 409–413 (2014).

2104 205. Lazaridis, I. *et al.* Genomic insights into the origin of farming in the ancient Near East. *Nature*  
2105 **536**, 419–424 (2016).

2106 206. Mathieson, I. *et al.* Genome-wide patterns of selection in 230 ancient Eurasians. *Nature* **528**,  
2107 499–503 (2015).

2108 207. Jones, E. R. *et al.* Upper Palaeolithic genomes reveal deep roots of modern Eurasians. *Nat.*  
2109 *Commun.* **6**, 8912 (2015).

2110 208. Skoglund, P. *et al.* Genomic diversity and admixture differs for Stone-Age Scandinavian foragers  
2111 and farmers. *Science* **344**, 747–750 (2014).

2112 209. Olalde, I. *et al.* Derived immune and ancestral pigmentation alleles in a 7,000-year-old  
2113 Mesolithic European. *Nature* **507**, 225–228 (2014).

2114 210. Sikora, M. *et al.* Ancient genomes show social and reproductive behavior of early Upper  
2115 Paleolithic foragers. *Science* **358**, 659–662 (2017).

2116 211. Fu, Q. *et al.* The genetic history of Ice Age Europe. *Nature* **534**, 200–205 (2016).

2117 212. Jones, E. R. *et al.* The Neolithic Transition in the Baltic Was Not Driven by Admixture with  
2118 Early European Farmers. *Curr. Biol.* **27**, 576–582 (2017).

2119 213. Seguin-Orlando, A. *et al.* Paleogenomics. Genomic structure in Europeans dating back at least  
2120 36,200 years. *Science* **346**, 1113–1118 (2014).

2121 214. Raghavan, M. *et al.* Upper Palaeolithic Siberian genome reveals dual ancestry of Native  
2122 Americans. *Nature* **505**, 87–91 (2014).

2123 215. Hofmanová, Z. *et al.* Early farmers from across Europe directly descended from Neolithic

2124 Aegeans. *Proc. Natl. Acad. Sci. U. S. A.* **113**, 6886–6891 (2016).

2125 216. de Barros Damgaard, P. *et al.* 137 ancient human genomes from across the Eurasian steppes.

2126 *Nature* **557**, 369–374 (2018).

2127 217. Günther, T. *et al.* Population genomics of Mesolithic Scandinavia: Investigating early postglacial

2128 migration routes and high-latitude adaptation. *PLoS Biol.* **16**, e2003703 (2018).

2129 218. Mittnik, A. *et al.* The genetic prehistory of the Baltic Sea region. *Nat. Commun.* **9**, 442 (2018).

2130 219. Kılınç, G. M. *et al.* The Demographic Development of the First Farmers in Anatolia. *Curr. Biol.*

2131 **26**, 2659–2666 (2016).

2132 220. Lazaridis, I. *et al.* Genetic origins of the Minoans and Mycenaeans. *Nature* **548**, 214–218 (2017).

2133 221. Valdiosera, C. *et al.* Four millennia of Iberian biomolecular prehistory illustrate the impact of

2134 prehistoric migrations at the far end of Eurasia. *Proc. Natl. Acad. Sci. U. S. A.* **115**, 3428–3433

2135 (2018).

2136 222. Mathieson, I. *et al.* The genomic history of southeastern Europe. *Nature* **555**, 197–203 (2018).

2137 223. Gallego Llorente, M. *et al.* Ancient Ethiopian genome reveals extensive Eurasian admixture

2138 throughout the African continent. *Science* **350**, 820–822 (2015).

2139 224. Broushaki, F. *et al.* Early Neolithic genomes from the eastern Fertile Crescent. *Science* **353**, 499–

2140 503 (2016).

2141 225. Veeramah, K. R. *et al.* Population genomic analysis of elongated skulls reveals extensive female-

2142 biased immigration in Early Medieval Bavaria. *Proc. Natl. Acad. Sci. U. S. A.* **115**, 3494–3499

2143 (2018).

2144 226. Amorim, C. E. G. *et al.* Understanding 6th-century barbarian social organization and migration

2145 through paleogenomics. *Nat. Commun.* **9**, 3547 (2018).

2146 227. Olalde, I. *et al.* A Common Genetic Origin for Early Farmers from Mediterranean Cardial and

2147 Central European LBK Cultures. *Mol. Biol. Evol.* **32**, 3132–3142 (2015).

2148 228. Olalde, I. *et al.* The Beaker phenomenon and the genomic transformation of northwest Europe.

2149 *Nature* **555**, 190–196 (2018).

2150 229. Alexander, D. H., Novembre, J. & Lange, K. Fast model-based estimation of ancestry in

2151 unrelated individuals. *Genome Res.* **19**, 1655–1664 (2009).

2152 230. Behr, A. A., Liu, K. Z., Liu-Fang, G., Nakka, P. & Ramachandran, S. pong: fast analysis and

2153 visualization of latent clusters in population genetic data. *Bioinformatics* **32**, 2817–2823 (2016).

2154 231. Yang, J., Lee, S. H., Goddard, M. E. & Visscher, P. M. GCTA: a tool for genome-wide complex

2155 trait analysis. *Am. J. Hum. Genet.* **88**, 76–82 (2011).

2156 232. Sikora, M., Pitulko, V., Sousa, V., Allentoft, M. E. & Vinner, L. The population history of  
2157 northeastern Siberia since the Pleistocene. *Nature* **570**, 182–188 (2019).

2158 233. Lamnidis, T. C. *et al.* Ancient Fennoscandian genomes reveal origin and spread of Siberian  
2159 ancestry in Europe. *Nat. Commun.* **9**, 5018 (2018).

2160 234. Raveane, A., Aneli, S., Montinaro, F. & Athanasiadis, G. Population structure of modern-day  
2161 Italians reveals patterns of ancient and archaic ancestries in Southern Europe. *bioRxiv* (2018).

2162 235. Lawson, D. J., Hellenthal, G., Myers, S. & Falush, D. Inference of population structure using  
2163 dense haplotype data. *PLoS Genet.* **8**, e1002453 (2012).

2164 236. Hellenthal, G. *et al.* A genetic atlas of human admixture history. *Science* **343**, 747–751 (2014).

2165 237. Nordhausen, K., Sirkia, S., Oja, H., Tyler, D. E. & Nordhausen, M. K. Package ‘ICSNP’. *R*  
2166 *package version 1.1-1* (2018).

2167 238. Bersaglieri, T. *et al.* Genetic signatures of strong recent positive selection at the lactase gene.  
2168 *Am. J. Hum. Genet.* **74**, 1111–1120 (2004).

2169 239. Pedersen, C. B. *et al.* The iPSYCH2012 case-cohort sample: new directions for unravelling  
2170 genetic and environmental architectures of severe mental disorders. *Mol. Psychiatry* **23**, 6–14  
2171 (2018).

2172 240. Walsh, S. *et al.* The HIrisPlex system for simultaneous prediction of hair and eye colour from  
2173 DNA. *Forensic Sci. Int. Genet.* **7**, 98–115 (2013).

2174 241. Cheng, J. Y., Mailund, T. & Nielsen, R. Fast admixture analysis and population tree estimation  
2175 for SNP and NGS data. *Bioinformatics* **33**, 2148–2155 (2017).

2176 242. Cheng, J. Y., Racimo, F. & Nielsen, R. Ohana: detecting selection in multiple populations by  
2177 modelling ancestral admixture components. *bioRxiv* 546408 (2019).

2178 243. Alves, J. M. *et al.* Parallel adaptation of rabbit populations to myxoma virus. *Science* **363**, 1319–  
2179 1326 (2019).

2180 244. Lek, M. *et al.* Analysis of protein-coding genetic variation in 60,706 humans. *Nature* **536**, 285–  
2181 291 (2016).

2182 245. Siddiqua, A. *et al.* Regulation of CD40 and CD40 ligand by the AT-hook transcription factor  
2183 AKNA. *Nature* **410**, 383–387 (2001).

2184 246. Fearon, E. R. *et al.* Identification of a chromosome 18q gene that is altered in colorectal cancers.  
2185 *Science* **247**, 49–56 (1990).

2186 247. Liu, X., Zou, H., Slaughter, C. & Wang, X. DFF, a heterodimeric protein that functions  
2187 downstream of caspase-3 to trigger DNA fragmentation during apoptosis. *Cell* **89**, 175–184

2188 (1997).

2189 248.Srour, M. *et al.* Joubert Syndrome in French Canadians and Identification of Mutations in  
2190 CEP104. *Am. J. Hum. Genet.* **97**, 744–753 (2015).

2191 249.O’Connell, J. *et al.* Haplotype estimation for biobank-scale data sets. *Nat. Genet.* **48**, 817–820  
2192 (2016).

2193 250.Howie, B. N., Donnelly, P. & Marchini, J. A flexible and accurate genotype imputation method  
2194 for the next generation of genome-wide association studies. *PLoS Genet.* **5**, e1000529 (2009).

2195 251.Price, A. L. *et al.* Principal components analysis corrects for stratification in genome-wide  
2196 association studies. *Nat. Genet.* **38**, 904–909 (2006).

2197 252.Watanabe, K. *et al.* A global view of pleiotropy and genetic architecture in complex traits.  
2198 *bioRxiv* 500090 (2018).

2199
